# Supplementary material
Source: MDPI journal article supplement (https://www.mdpi.com/1660-3397/6/4/550)
Supplement: s1 [file s1]

Archive with 9 entries (9 files):
- doc.kml
- files/modis_sst_l3.gif
- files/google_earth_banner.png
- files/google_earth_banner_01.png
- files/mysavedplaces_closed.png
- files/735022rgb_T.KMZ.png
- files/735018rgb_T.KMZ.png
- files/mysavedplaces_open.png
- files/modis_chlor.gif
