# Supplementary material
Source: MDPI journal article supplement (https://www.mdpi.com/1660-3397/6/4/550)
Supplement: s1 [file s1 › doc.kml]

<?xml version="1.0" encoding="UTF-8"?>
<kml xmlns="http://earth.google.com/kml/2.2">
<Folder>
	<name>My Places</name>
	<visibility>0</visibility>
	<open>1</open>
	<Style>
		<ListStyle>
			<listItemType>check</listItemType>
			<ItemIcon>
				<state>open</state>
				<href>files/mysavedplaces_open.png</href>
			</ItemIcon>
			<ItemIcon>
				<state>closed</state>
				<href>files/mysavedplaces_closed.png</href>
			</ItemIcon>
			<bgColor>00ffffff</bgColor>
		</ListStyle>
	</Style>
	<Document id="spreadsheet_template_copy0" xmlns:atom="http://www.w3.org/2005/Atom">
		<name>UNDP: Millennium Development Goals Monitor</name>
		<visibility>0</visibility>
		<atom:author><atom:name><b>MDG</b>MONITOR</atom:name></atom:author>
		<StyleMap id="text_photo_banner_copy0">
			<Pair>
				<key>normal</key>
				<styleUrl>#text_photo_banner_off</styleUrl>
			</Pair>
			<Pair>
				<key>highlight</key>
				<styleUrl>#text_photo_banner_on</styleUrl>
			</Pair>
		</StyleMap>
		<Style id="text_photo_banner_on">
			<IconStyle>
				<Icon>
					<href>files/mdg_icon.png</href>
				</Icon>
			</IconStyle>
			<BalloonStyle>
				<text>$[description]</text>
			</BalloonStyle>
		</Style>
		<Style id="text_photo_banner_on_copy0">
			<IconStyle>
				<Icon>
					<href>files/mdg_icon.png</href>
				</Icon>
			</IconStyle>
			<BalloonStyle>
				<text>$[description]</text>
			</BalloonStyle>
		</Style>
		<Style id="text_photo_banner_off_copy0">
			<IconStyle>
				<Icon>
					<href>files/mdg_icon.png</href>
				</Icon>
			</IconStyle>
			<LabelStyle>
				<scale>0</scale>
			</LabelStyle>
			<BalloonStyle>
				<text>$[description]</text>
			</BalloonStyle>
		</Style>
		<StyleMap id="text_photo_banner">
			<Pair>
				<key>normal</key>
				<styleUrl>#text_photo_banner_off</styleUrl>
			</Pair>
			<Pair>
				<key>highlight</key>
				<styleUrl>#text_photo_banner_on</styleUrl>
			</Pair>
		</StyleMap>
		<Style id="text_photo_banner_off">
			<IconStyle>
				<Icon>
					<href>files/mdg_icon.png</href>
				</Icon>
			</IconStyle>
			<LabelStyle>
				<scale>0</scale>
			</LabelStyle>
			<BalloonStyle>
				<text>$[description]</text>
			</BalloonStyle>
		</Style>
		<Placemark>
			<name>Albania</name>
			<visibility>0</visibility>
			<address>http://www.mdgmonitor.org/factsheets_00.cfm?c=ALB</address>
			<Snippet maxLines="2"></Snippet>
			<description><![CDATA[<table width='350' border='0' cellpadding='3' cellspacing='0' bgcolor='#FFFFFF'> <tr> <td align='left'><table border='0' cellspacing='0' cellpadding='0'> <tr> <td rowspan='2' align='left' valign='middle'><a href='http://www.mdgmonitor.org/'><img src='files/mdg_logo.png' alt='mdp logo' border='0' /></a></td> <td align='left' valign='bottom'><font color='#00486D' size='6'><b>MDG</b>MONITOR</td> </tr> <tr> <td align='right' valign='top'><font color='#00486D' size='4'>Track. Learn. Support.</font></td> </tr> </table></td> </tr> <tr> <td align='left' valign='top' bgcolor='#003F7C'><font color='#FFFFFF' size='5'><strong>Albania</strong></font></td> </tr> <tr> <td align='left' valign='top'><table border='0' cellspacing='0' cellpadding='0'> <tr> <td align='left' valign='top'><a href='http://www.mdgmonitor.org/factsheets_00.cfm?c=ALB'><img src='files/albania.jpg' alt='image' width='200' border='0' align='left' /></a></td> <td align='left' valign='middle'><p><strong><font size='3'>Total Population (millions):</font> </strong>3.1</p><p><strong><font size'3'><a href='http://unstats.un.org/unsd/cdb/cdb_dict_xrxx.asp?def_code=63'>GDP</a> per capita (PPP US$):</font></strong> 5318 </p><p><font size='3'><strong>2006 <a href='http://hdr.undp.org/hdr2006/statistics/indices/default.cfm' target='_blank'>Human Development Index</a> (Rank 1-177):</strong> </font>73 </p></td> </tr> </table></td> </tr> <tr> <td align='left' valign='top'><font color='#003F7C' size='5'><strong>Nine MDGs</strong></font></td> </tr> <tr> <td align='left' valign='top'><p><font color='#000000'>In addition to good governance – the country’s “ninth” Millennium Development Goal – Albania concentrates on poverty reduction, gender equality, and environmental sustainability.A parliamentary MDG resolution, briefing sessions and other advocacy methods have inspired the country to come up with ways to achieve the MDGs at the local level.  The government is preparing a national strategy where all regions of the country will contribute in the effort to reduce social and economic disparities.</font></p></td> </tr> <tr> <td align='left' valign='top'><a href='http://www.mdgmonitor.org/factsheets_00.cfm?c=ALB'>Read more... </a></td> </tr> <tr> <td align='right' valign='top'><p>Read related articles on <a href='http://news.google.com/archivesearch?q=albania+and+%22millennium+development+goals%22&hl=en&ned=us&ie=UTF-8'>Google News</a></p></td> </tr> <tr> <td align='right' valign='top'>&nbsp;</td> </tr> <tr> <td align='center'><table border='0' cellpadding='0' cellspacing='0'> <tr> <td align='right' valign='middle'><a href='http://www.un.org/'><img src='files/un_logo_small.png' alt='UN logo' border='0' /></a></td> <td align='left' valign='middle'><font color='#666666'>The  <a href="http://www.un.org/millenniumgoals/" target="_blank">Millennium Development Goals </a>(MDGs) were laid out by the leaders of the world in 2000. They include  halving extreme poverty, halting the spread of HIV/AIDS and   providing universal primary education, all by 2015.</font></td> </tr> </table></td> </tr> </table>]]></description>
			<styleUrl>#text_photo_banner</styleUrl>
			<Point>
				<coordinates>19.819999,41.330001,0</coordinates>
			</Point>
		</Placemark>
		<Placemark>
			<name>Algeria</name>
			<visibility>0</visibility>
			<address>http://www.mdgmonitor.org/factsheets_00.cfm?c=DZA</address>
			<Snippet maxLines="2"></Snippet>
			<description><![CDATA[<table width='350' border='0' cellpadding='3' cellspacing='0' bgcolor='#FFFFFF'> <tr> <td align='left'><table border='0' cellspacing='0' cellpadding='0'> <tr> <td rowspan='2' align='left' valign='middle'><a href='http://www.mdgmonitor.org/'><img src='files/mdg_logo.png' alt='mdp logo' border='0' /></a></td> <td align='left' valign='bottom'><font color='#00486D' size='6'><b>MDG</b>MONITOR</td> </tr> <tr> <td align='right' valign='top'><font color='#00486D' size='4'>Track. Learn. Support.</font></td> </tr> </table></td> </tr> <tr> <td align='left' valign='top' bgcolor='#003F7C'><font color='#FFFFFF' size='5'><strong>Algeria</strong></font></td> </tr> <tr> <td align='left' valign='top'><table border='0' cellspacing='0' cellpadding='0'> <tr> <td align='left' valign='top'><a href='http://www.mdgmonitor.org/factsheets_00.cfm?c=DZA'><img src='files/algeria.jpg' alt='image' width='200' border='0' align='left' /></a></td> <td align='left' valign='middle'><p><strong><font size='3'>Total Population (millions):</font> </strong>32.85</p><p><strong><font size'3'><a href='http://unstats.un.org/unsd/cdb/cdb_dict_xrxx.asp?def_code=63'>GDP</a> per capita (PPP US$):</font></strong> 7111 </p><p><font size='3'><strong>2006 <a href='http://hdr.undp.org/hdr2006/statistics/indices/default.cfm' target='_blank'>Human Development Index</a> (Rank 1-177):</strong> </font>102 </p></td> </tr> </table></td> </tr> <tr> <td align='left' valign='top'><font color='#003F7C' size='5'><strong>Economic growth with public investments</strong></font></td> </tr> <tr> <td align='left' valign='top'><p><font color='#000000'>Steady progress continues to be made in Algeria.  The eradication of extreme poverty and reduction of unemployment (from 27 percent in 2001 to 12.3 percent in 2006) are due to an upsurge in economic growth and public investment programmes.  Job creation is accommodating population growth as well as the growing number of young females in the labour market.  In addition, parity between boys and girls has essentially been achieved at the primary school level; almost a quarter of the State’s annual budget is allocated to education.</font></p></td> </tr> <tr> <td align='left' valign='top'><a href='http://www.mdgmonitor.org/factsheets_00.cfm?c=DZA'>Read more... </a></td> </tr> <tr> <td align='right' valign='top'><p>Read related articles on <a href='http://news.google.com/archivesearch?q=algeria+%22millennium+development+goals%22&hl=en&ned=us'>Google News</a></p></td> </tr> <tr> <td align='right' valign='top'>&nbsp;</td> </tr> <tr> <td align='center'><table border='0' cellpadding='0' cellspacing='0'> <tr> <td align='right' valign='middle'><a href='http://www.un.org/'><img src='files/un_logo_small.png' alt='UN logo' border='0' /></a></td> <td align='left' valign='middle'><font color='#666666'>The  <a href="http://www.un.org/millenniumgoals/" target="_blank">Millennium Development Goals </a>(MDGs) were laid out by the leaders of the world in 2000. They include  halving extreme poverty, halting the spread of HIV/AIDS and   providing universal primary education, all by 2015.</font></td> </tr> </table></td> </tr> </table>]]></description>
			<styleUrl>#text_photo_banner</styleUrl>
			<Point>
				<coordinates>3.039999,36.77,0</coordinates>
			</Point>
		</Placemark>
		<Placemark>
			<name>Angola</name>
			<visibility>0</visibility>
			<address>http://www.mdgmonitor.org/factsheets_00.cfm?c=AGO</address>
			<Snippet maxLines="2"></Snippet>
			<description><![CDATA[<table width='350' border='0' cellpadding='3' cellspacing='0' bgcolor='#FFFFFF'> <tr> <td align='left'><table border='0' cellspacing='0' cellpadding='0'> <tr> <td rowspan='2' align='left' valign='middle'><a href='http://www.mdgmonitor.org/'><img src='files/mdg_logo.png' alt='mdp logo' border='0' /></a></td> <td align='left' valign='bottom'><font color='#00486D' size='6'><b>MDG</b>MONITOR</td> </tr> <tr> <td align='right' valign='top'><font color='#00486D' size='4'>Track. Learn. Support.</font></td> </tr> </table></td> </tr> <tr> <td align='left' valign='top' bgcolor='#003F7C'><font color='#FFFFFF' size='5'><strong>Angola</strong></font></td> </tr> <tr> <td align='left' valign='top'><table border='0' cellspacing='0' cellpadding='0'> <tr> <td align='left' valign='top'><a href='http://www.mdgmonitor.org/factsheets_00.cfm?c=AGO'><img src='files/angola.jpg' alt='image' width='200' border='0' align='left' /></a></td> <td align='left' valign='middle'><p><strong><font size='3'>Total Population (millions):</font> </strong>15.94</p><p><strong><font size'3'><a href='http://unstats.un.org/unsd/cdb/cdb_dict_xrxx.asp?def_code=63'>GDP</a> per capita (PPP US$):</font></strong> 2425 </p><p><font size='3'><strong>2006 <a href='http://hdr.undp.org/hdr2006/statistics/indices/default.cfm' target='_blank'>Human Development Index</a> (Rank 1-177):</strong> </font>161 </p></td> </tr> </table></td> </tr> <tr> <td align='left' valign='top'><font color='#003F7C' size='5'><strong>Recovering from civil war</strong></font></td> </tr> <tr> <td align='left' valign='top'><p><font color='#000000'>Incorporating the MDGs into long-term development plans and rebuilding infrastructures are the most pressing tasks for Angola, a resource-rich country that emerged from a 30-year civil war in 2002.  Achieving universal education is the African country’s most noteworthy MDG advancement: Between 1999 and 2006, the net enrolment rate in primary education grew from 47 per cent to 56 per cent, thanks to government programmes that developed social infrastructures such as primary schools, and set up successful initiatives, such as teacher-recruitment programmes.</font></p></td> </tr> <tr> <td align='left' valign='top'><a href='http://www.mdgmonitor.org/factsheets_00.cfm?c=AGO'>Read more... </a></td> </tr> <tr> <td align='right' valign='top'><p>Read related articles on <a href='http://news.google.com/archivesearch?q=angola+%22millennium+development+goals%22&hl=en&ned=us'>Google News</a></p></td> </tr> <tr> <td align='right' valign='top'>&nbsp;</td> </tr> <tr> <td align='center'><table border='0' cellpadding='0' cellspacing='0'> <tr> <td align='right' valign='middle'><a href='http://www.un.org/'><img src='files/un_logo_small.png' alt='UN logo' border='0' /></a></td> <td align='left' valign='middle'><font color='#666666'>The  <a href="http://www.un.org/millenniumgoals/" target="_blank">Millennium Development Goals </a>(MDGs) were laid out by the leaders of the world in 2000. They include  halving extreme poverty, halting the spread of HIV/AIDS and   providing universal primary education, all by 2015.</font></td> </tr> </table></td> </tr> </table>]]></description>
			<styleUrl>#text_photo_banner</styleUrl>
			<Point>
				<coordinates>13.239999,-8.819998999999999,0</coordinates>
			</Point>
		</Placemark>
		<Placemark>
			<name>Antigua &amp; Barbuda (Barbados)</name>
			<visibility>0</visibility>
			<address>http://www.mdgmonitor.org/factsheets_00.cfm?c=ATG</address>
			<Snippet maxLines="2"></Snippet>
			<description><![CDATA[<table width='350' border='0' cellpadding='3' cellspacing='0' bgcolor='#FFFFFF'> <tr> <td align='left'><table border='0' cellspacing='0' cellpadding='0'> <tr> <td rowspan='2' align='left' valign='middle'><a href='http://www.mdgmonitor.org/'><img src='files/mdg_logo.png' alt='mdp logo' border='0' /></a></td> <td align='left' valign='bottom'><font color='#00486D' size='6'><b>MDG</b>MONITOR</td> </tr> <tr> <td align='right' valign='top'><font color='#00486D' size='4'>Track. Learn. Support.</font></td> </tr> </table></td> </tr> <tr> <td align='left' valign='top' bgcolor='#003F7C'><font color='#FFFFFF' size='5'><strong>Antigua & Barbuda (Barbados)</strong></font></td> </tr> <tr> <td align='left' valign='top'><table border='0' cellspacing='0' cellpadding='0'> <tr> <td align='left' valign='top'><a href='http://www.mdgmonitor.org/factsheets_00.cfm?c=ATG'><img src='files/antigua.jpg' alt='image' width='200' border='0' align='left' /></a></td> <td align='left' valign='middle'><p><strong><font size='3'>Total Population (millions):</font> </strong>0.08</p><p><strong><font size'3'><a href='http://unstats.un.org/unsd/cdb/cdb_dict_xrxx.asp?def_code=63'>GDP</a> per capita (PPP US$):</font></strong> 12337 </p><p><font size='3'><strong>2006 <a href='http://hdr.undp.org/hdr2006/statistics/indices/default.cfm' target='_blank'>Human Development Index</a> (Rank 1-177):</strong> </font>59 </p></td> </tr> </table></td> </tr> <tr> <td align='left' valign='top'><font color='#003F7C' size='5'><strong>MDGs against crime and terrorism</strong></font></td> </tr> <tr> <td align='left' valign='top'><p><font color='#000000'>In Antigua and Barbuda, two additional Millennium Development Goals (MDGs) have been added. One is to take concerted action against international terrorism and to accede as soon as possible to all relevant conventions. The second affirms the intention of the government to intensify its efforts to fight transnational crime, including the trafficking and smuggling of human beings, and money laundering.</font></p></td> </tr> <tr> <td align='left' valign='top'><a href='http://www.mdgmonitor.org/factsheets_00.cfm?c=ATG'>Read more... </a></td> </tr> <tr> <td align='right' valign='top'><p>Read related articles on <a href='http://news.google.com/archivesearch?q=antigua+%22millennium+development+goals%22&hl=en&ned=us'>Google News</a></p></td> </tr> <tr> <td align='right' valign='top'>&nbsp;</td> </tr> <tr> <td align='center'><table border='0' cellpadding='0' cellspacing='0'> <tr> <td align='right' valign='middle'><a href='http://www.un.org/'><img src='files/un_logo_small.png' alt='UN logo' border='0' /></a></td> <td align='left' valign='middle'><font color='#666666'>The  <a href="http://www.un.org/millenniumgoals/" target="_blank">Millennium Development Goals </a>(MDGs) were laid out by the leaders of the world in 2000. They include  halving extreme poverty, halting the spread of HIV/AIDS and   providing universal primary education, all by 2015.</font></td> </tr> </table></td> </tr> </table>]]></description>
			<styleUrl>#text_photo_banner</styleUrl>
			<Point>
				<coordinates>-61.849998,17.11,0</coordinates>
			</Point>
		</Placemark>
		<Placemark>
			<name>Argentina</name>
			<visibility>0</visibility>
			<address>http://www.mdgmonitor.org/factsheets_00.cfm?c=ARG</address>
			<Snippet maxLines="2"></Snippet>
			<description><![CDATA[<table width='350' border='0' cellpadding='3' cellspacing='0' bgcolor='#FFFFFF'> <tr> <td align='left'><table border='0' cellspacing='0' cellpadding='0'> <tr> <td rowspan='2' align='left' valign='middle'><a href='http://www.mdgmonitor.org/'><img src='files/mdg_logo.png' alt='mdp logo' border='0' /></a></td> <td align='left' valign='bottom'><font color='#00486D' size='6'><b>MDG</b>MONITOR</td> </tr> <tr> <td align='right' valign='top'><font color='#00486D' size='4'>Track. Learn. Support.</font></td> </tr> </table></td> </tr> <tr> <td align='left' valign='top' bgcolor='#003F7C'><font color='#FFFFFF' size='5'><strong>Argentina</strong></font></td> </tr> <tr> <td align='left' valign='top'><table border='0' cellspacing='0' cellpadding='0'> <tr> <td align='left' valign='top'><a href='http://www.mdgmonitor.org/factsheets_00.cfm?c=ARG'><img src='files/argentina.jpg' alt='image' width='200' border='0' align='left' /></a></td> <td align='left' valign='middle'><p><strong><font size='3'>Total Population (millions):</font> </strong>38.75</p><p><strong><font size'3'><a href='http://unstats.un.org/unsd/cdb/cdb_dict_xrxx.asp?def_code=63'>GDP</a> per capita (PPP US$):</font></strong> 14421 </p><p><font size='3'><strong>2006 <a href='http://hdr.undp.org/hdr2006/statistics/indices/default.cfm' target='_blank'>Human Development Index</a> (Rank 1-177):</strong> </font>36 </p></td> </tr> </table></td> </tr> <tr> <td align='left' valign='top'><font color='#003F7C' size='5'><strong>Substantive improvements</strong></font></td> </tr> <tr> <td align='left' valign='top'><p><font color='#000000'>The Government of Argentina that came to power in 2003 is, with the cooperation of the United Nations, adapting the Millennium Development Goals to reflect the needs of the country. Argentina plans to develop a set of tools that concentrates on localization as well as human rights, characterized by the participation of civil society organizations such as the Grandmothers of the “Plaza de Mayo.” Compared to 2003, when Argentina started to emerge from its economic crisis, the indicators reflect substantive improvement in all areas, including the parameters pertaining to decent work. But some indicators still lag behind.</font></p></td> </tr> <tr> <td align='left' valign='top'><a href='http://www.mdgmonitor.org/factsheets_00.cfm?c=ARG'>Read more... </a></td> </tr> <tr> <td align='right' valign='top'><p>Read related articles on <a href='http://news.google.com/news?hl=en&ned=us&q=argentina+%22millennium+development+goals%22'>Google News</a></p></td> </tr> <tr> <td align='right' valign='top'>&nbsp;</td> </tr> <tr> <td align='center'><table border='0' cellpadding='0' cellspacing='0'> <tr> <td align='right' valign='middle'><a href='http://www.un.org/'><img src='files/un_logo_small.png' alt='UN logo' border='0' /></a></td> <td align='left' valign='middle'><font color='#666666'>The  <a href="http://www.un.org/millenniumgoals/" target="_blank">Millennium Development Goals </a>(MDGs) were laid out by the leaders of the world in 2000. They include  halving extreme poverty, halting the spread of HIV/AIDS and   providing universal primary education, all by 2015.</font></td> </tr> </table></td> </tr> </table>]]></description>
			<styleUrl>#text_photo_banner</styleUrl>
			<Point>
				<coordinates>-58.369998,-34.364241,0</coordinates>
			</Point>
		</Placemark>
		<Placemark>
			<name>Armenia</name>
			<visibility>0</visibility>
			<address>http://www.mdgmonitor.org/factsheets_00.cfm?c=ARM</address>
			<Snippet maxLines="2"></Snippet>
			<description><![CDATA[<table width='350' border='0' cellpadding='3' cellspacing='0' bgcolor='#FFFFFF'> <tr> <td align='left'><table border='0' cellspacing='0' cellpadding='0'> <tr> <td rowspan='2' align='left' valign='middle'><a href='http://www.mdgmonitor.org/'><img src='files/mdg_logo.png' alt='mdp logo' border='0' /></a></td> <td align='left' valign='bottom'><font color='#00486D' size='6'><b>MDG</b>MONITOR</td> </tr> <tr> <td align='right' valign='top'><font color='#00486D' size='4'>Track. Learn. Support.</font></td> </tr> </table></td> </tr> <tr> <td align='left' valign='top' bgcolor='#003F7C'><font color='#FFFFFF' size='5'><strong>Armenia</strong></font></td> </tr> <tr> <td align='left' valign='top'><table border='0' cellspacing='0' cellpadding='0'> <tr> <td align='left' valign='top'><a href='http://www.mdgmonitor.org/factsheets_00.cfm?c=ARM'><img src='files/armenia.jpg' alt='image' width='200' border='0' align='left' /></a></td> <td align='left' valign='middle'><p><strong><font size='3'>Total Population (millions):</font> </strong>3.02</p><p><strong><font size'3'><a href='http://unstats.un.org/unsd/cdb/cdb_dict_xrxx.asp?def_code=63'>GDP</a> per capita (PPP US$):</font></strong> 5013 </p><p><font size='3'><strong>2006 <a href='http://hdr.undp.org/hdr2006/statistics/indices/default.cfm' target='_blank'>Human Development Index</a> (Rank 1-177):</strong> </font>80 </p></td> </tr> </table></td> </tr> <tr> <td align='left' valign='top'><font color='#003F7C' size='5'><strong>Ambitious goals</strong></font></td> </tr> <tr> <td align='left' valign='top'><p><font color='#000000'>Localizing the Millennium Development Goals (MDGs) in Armenia has resulted in setting more ambitious goals. For example, MDG No. 7 – to ensure environmental sustainability – includes water management issues concerning Lake Sevan, the largest lake in the country. The country has also committed to ensuring appropriate levels of good governance, political rights and responsibilities, and human rights protection.</font></p></td> </tr> <tr> <td align='left' valign='top'><a href='http://www.mdgmonitor.org/factsheets_00.cfm?c=ARM'>Read more... </a></td> </tr> <tr> <td align='right' valign='top'><p>Read related articles on <a href='http://news.google.com/archivesearch?hl=en&ned=us&q=armenia+and+%22millennium+development+goals%22&ie=UTF-8'>Google News</a></p></td> </tr> <tr> <td align='right' valign='top'>&nbsp;</td> </tr> <tr> <td align='center'><table border='0' cellpadding='0' cellspacing='0'> <tr> <td align='right' valign='middle'><a href='http://www.un.org/'><img src='files/un_logo_small.png' alt='UN logo' border='0' /></a></td> <td align='left' valign='middle'><font color='#666666'>The  <a href="http://www.un.org/millenniumgoals/" target="_blank">Millennium Development Goals </a>(MDGs) were laid out by the leaders of the world in 2000. They include  halving extreme poverty, halting the spread of HIV/AIDS and   providing universal primary education, all by 2015.</font></td> </tr> </table></td> </tr> </table>]]></description>
			<styleUrl>#text_photo_banner</styleUrl>
			<Point>
				<coordinates>44.52,40.169998,0</coordinates>
			</Point>
		</Placemark>
		<Placemark>
			<name>Azerbaijan</name>
			<visibility>0</visibility>
			<address>http://www.mdgmonitor.org/factsheets_00.cfm?c=AZE</address>
			<Snippet maxLines="2"></Snippet>
			<description><![CDATA[<table width='350' border='0' cellpadding='3' cellspacing='0' bgcolor='#FFFFFF'> <tr> <td align='left'><table border='0' cellspacing='0' cellpadding='0'> <tr> <td rowspan='2' align='left' valign='middle'><a href='http://www.mdgmonitor.org/'><img src='files/mdg_logo.png' alt='mdp logo' border='0' /></a></td> <td align='left' valign='bottom'><font color='#00486D' size='6'><b>MDG</b>MONITOR</td> </tr> <tr> <td align='right' valign='top'><font color='#00486D' size='4'>Track. Learn. Support.</font></td> </tr> </table></td> </tr> <tr> <td align='left' valign='top' bgcolor='#003F7C'><font color='#FFFFFF' size='5'><strong>Azerbaijan</strong></font></td> </tr> <tr> <td align='left' valign='top'><table border='0' cellspacing='0' cellpadding='0'> <tr> <td align='left' valign='top'><a href='http://www.mdgmonitor.org/factsheets_00.cfm?c=AZE'><img src='files/azerbaijan.jpg' alt='image' width='200' border='0' align='left' /></a></td> <td align='left' valign='middle'><p><strong><font size='3'>Total Population (millions):</font> </strong>8.41</p><p><strong><font size'3'><a href='http://unstats.un.org/unsd/cdb/cdb_dict_xrxx.asp?def_code=63'>GDP</a> per capita (PPP US$):</font></strong> 5607 </p><p><font size='3'><strong>2006 <a href='http://hdr.undp.org/hdr2006/statistics/indices/default.cfm' target='_blank'>Human Development Index</a> (Rank 1-177):</strong> </font>99 </p></td> </tr> </table></td> </tr> <tr> <td align='left' valign='top'><font color='#003F7C' size='5'><strong>Poverty cut by nearly half in three years</strong></font></td> </tr> <tr> <td align='left' valign='top'><p><font color='#000000'>The percentage of Azerbaijan’s population living in poverty has fallen by nearly half, from 46 per cent in 2003 to 20 per cent in 2006.  Azerbaijan’s government has worked closely with a fast reforming UN system to implement poverty reduction and economic development strategies, to localize the MDGs and to accurately report the goals’ progress.</font></p></td> </tr> <tr> <td align='left' valign='top'><a href='http://www.mdgmonitor.org/factsheets_00.cfm?c=AZE'>Read more... </a></td> </tr> <tr> <td align='right' valign='top'><p>Read related articles on <a href='http://news.google.com/archivesearch?hl=en&ned=us&ie=UTF-8&q=azerbaijan+%22millennium+development+goals%22'>Google News</a></p></td> </tr> <tr> <td align='right' valign='top'>&nbsp;</td> </tr> <tr> <td align='center'><table border='0' cellpadding='0' cellspacing='0'> <tr> <td align='right' valign='middle'><a href='http://www.un.org/'><img src='files/un_logo_small.png' alt='UN logo' border='0' /></a></td> <td align='left' valign='middle'><font color='#666666'>The  <a href="http://www.un.org/millenniumgoals/" target="_blank">Millennium Development Goals </a>(MDGs) were laid out by the leaders of the world in 2000. They include  halving extreme poverty, halting the spread of HIV/AIDS and   providing universal primary education, all by 2015.</font></td> </tr> </table></td> </tr> </table>]]></description>
			<styleUrl>#text_photo_banner</styleUrl>
			<Point>
				<coordinates>49.86000000000001,40.39,0</coordinates>
			</Point>
		</Placemark>
		<Placemark>
			<name>Bahrain</name>
			<visibility>0</visibility>
			<address>http://www.mdgmonitor.org/factsheets_00.cfm?c=BHR</address>
			<Snippet maxLines="2"></Snippet>
			<description><![CDATA[<table width='350' border='0' cellpadding='3' cellspacing='0' bgcolor='#FFFFFF'> <tr> <td align='left'><table border='0' cellspacing='0' cellpadding='0'> <tr> <td rowspan='2' align='left' valign='middle'><a href='http://www.mdgmonitor.org/'><img src='files/mdg_logo.png' alt='mdp logo' border='0' /></a></td> <td align='left' valign='bottom'><font color='#00486D' size='6'><b>MDG</b>MONITOR</td> </tr> <tr> <td align='right' valign='top'><font color='#00486D' size='4'>Track. Learn. Support.</font></td> </tr> </table></td> </tr> <tr> <td align='left' valign='top' bgcolor='#003F7C'><font color='#FFFFFF' size='5'><strong>Bahrain</strong></font></td> </tr> <tr> <td align='left' valign='top'><table border='0' cellspacing='0' cellpadding='0'> <tr> <td align='left' valign='top'><a href='http://www.mdgmonitor.org/factsheets_00.cfm?c=BHR'><img src='files/bahrain.jpg' alt='image' width='200' border='0' align='left' /></a></td> <td align='left' valign='middle'><p><strong><font size='3'>Total Population (millions):</font> </strong>0.73</p><p><strong><font size'3'><a href='http://unstats.un.org/unsd/cdb/cdb_dict_xrxx.asp?def_code=63'>GDP</a> per capita (PPP US$):</font></strong> 20759 </p><p><font size='3'><strong>2006 <a href='http://hdr.undp.org/hdr2006/statistics/indices/default.cfm' target='_blank'>Human Development Index</a> (Rank 1-177):</strong> </font>39 </p></td> </tr> </table></td> </tr> <tr> <td align='left' valign='top'><font color='#003F7C' size='5'><strong>Mostly on track!</strong></font></td> </tr> <tr> <td align='left' valign='top'><p><font color='#000000'>Bahrain is on track to achieve most of the Millennium Development Goals (MDGs). The country is free from extreme poverty (defined as living on less than one dollar a day). Bahrain also has 100 per cent enrolment in primary school, and is on the way to meet the 2015 target of reducing child and maternal mortality. However Bahrain would need to take appropriate measures to meet MDG 7 (Ensuring a sustainable environment), including carbon emission, marine life protection and costal areas management.</font></p></td> </tr> <tr> <td align='left' valign='top'><a href='http://www.mdgmonitor.org/factsheets_00.cfm?c=BHR'>Read more... </a></td> </tr> <tr> <td align='right' valign='top'><p>Read related articles on <a href='http://news.google.com/archivesearch?hl=en&ned=us&q=bahrain+and+%22millennium+development+goals%22&ie=UTF-8'>Google News</a></p></td> </tr> <tr> <td align='right' valign='top'>&nbsp;</td> </tr> <tr> <td align='center'><table border='0' cellpadding='0' cellspacing='0'> <tr> <td align='right' valign='middle'><a href='http://www.un.org/'><img src='files/un_logo_small.png' alt='UN logo' border='0' /></a></td> <td align='left' valign='middle'><font color='#666666'>The  <a href="http://www.un.org/millenniumgoals/" target="_blank">Millennium Development Goals </a>(MDGs) were laid out by the leaders of the world in 2000. They include  halving extreme poverty, halting the spread of HIV/AIDS and   providing universal primary education, all by 2015.</font></td> </tr> </table></td> </tr> </table>]]></description>
			<styleUrl>#text_photo_banner</styleUrl>
			<Point>
				<coordinates>50.58000100000001,26.209999,0</coordinates>
			</Point>
		</Placemark>
		<Placemark>
			<name>Bangladesh</name>
			<visibility>0</visibility>
			<address>http://www.mdgmonitor.org/factsheets_00.cfm?c=BGD</address>
			<Snippet maxLines="2"></Snippet>
			<description><![CDATA[<table width='350' border='0' cellpadding='3' cellspacing='0' bgcolor='#FFFFFF'> <tr> <td align='left'><table border='0' cellspacing='0' cellpadding='0'> <tr> <td rowspan='2' align='left' valign='middle'><a href='http://www.mdgmonitor.org/'><img src='files/mdg_logo.png' alt='mdp logo' border='0' /></a></td> <td align='left' valign='bottom'><font color='#00486D' size='6'><b>MDG</b>MONITOR</td> </tr> <tr> <td align='right' valign='top'><font color='#00486D' size='4'>Track. Learn. Support.</font></td> </tr> </table></td> </tr> <tr> <td align='left' valign='top' bgcolor='#003F7C'><font color='#FFFFFF' size='5'><strong>Bangladesh</strong></font></td> </tr> <tr> <td align='left' valign='top'><table border='0' cellspacing='0' cellpadding='0'> <tr> <td align='left' valign='top'><a href='http://www.mdgmonitor.org/factsheets_00.cfm?c=BGD'><img src='files/bangladesh.jpg' alt='image' width='200' border='0' align='left' /></a></td> <td align='left' valign='middle'><p><strong><font size='3'>Total Population (millions):</font> </strong>141.82</p><p><strong><font size'3'><a href='http://unstats.un.org/unsd/cdb/cdb_dict_xrxx.asp?def_code=63'>GDP</a> per capita (PPP US$):</font></strong> 1997 </p><p><font size='3'><strong>2006 <a href='http://hdr.undp.org/hdr2006/statistics/indices/default.cfm' target='_blank'>Human Development Index</a> (Rank 1-177):</strong> </font>137 </p></td> </tr> </table></td> </tr> <tr> <td align='left' valign='top'><font color='#003F7C' size='5'><strong>Rural poverty as a major issue</strong></font></td> </tr> <tr> <td align='left' valign='top'><p><font color='#000000'>Bangladesh made noteworthy progress in attaining the Millennium Development Goals (MDGs).  Income poverty decreased from 59 per cent in 1990 to 40 per cent in 2003, and the gender gap in primary and secondary school enrolment has been eliminated. Urbanization poses a problem. Poverty remains largely a rural phenomenon. An estimated 85 percent of the country’s poor – 53.5 million out of a total of 62.7 million poor – live in the rural areas.</font></p></td> </tr> <tr> <td align='left' valign='top'><a href='http://www.mdgmonitor.org/factsheets_00.cfm?c=BGD'>Read more... </a></td> </tr> <tr> <td align='right' valign='top'><p>Read related articles on <a href='http://news.google.com/news?hl=en&ned=us&q=bangladesh+and+%22millennium+development+goals%22'>Google News</a></p></td> </tr> <tr> <td align='right' valign='top'>&nbsp;</td> </tr> <tr> <td align='center'><table border='0' cellpadding='0' cellspacing='0'> <tr> <td align='right' valign='middle'><a href='http://www.un.org/'><img src='files/un_logo_small.png' alt='UN logo' border='0' /></a></td> <td align='left' valign='middle'><font color='#666666'>The  <a href="http://www.un.org/millenniumgoals/" target="_blank">Millennium Development Goals </a>(MDGs) were laid out by the leaders of the world in 2000. They include  halving extreme poverty, halting the spread of HIV/AIDS and   providing universal primary education, all by 2015.</font></td> </tr> </table></td> </tr> </table>]]></description>
			<styleUrl>#text_photo_banner</styleUrl>
			<Point>
				<coordinates>90.38999900000002,23.7,0</coordinates>
			</Point>
		</Placemark>
		<Placemark>
			<name>Barbados</name>
			<visibility>0</visibility>
			<address>http://www.mdgmonitor.org/factsheets_00.cfm?c=BRB</address>
			<Snippet maxLines="2"></Snippet>
			<description><![CDATA[<table width='350' border='0' cellpadding='3' cellspacing='0' bgcolor='#FFFFFF'> <tr> <td align='left'><table border='0' cellspacing='0' cellpadding='0'> <tr> <td rowspan='2' align='left' valign='middle'><a href='http://www.mdgmonitor.org/'><img src='files/mdg_logo.png' alt='mdp logo' border='0' /></a></td> <td align='left' valign='bottom'><font color='#00486D' size='6'><b>MDG</b>MONITOR</td> </tr> <tr> <td align='right' valign='top'><font color='#00486D' size='4'>Track. Learn. Support.</font></td> </tr> </table></td> </tr> <tr> <td align='left' valign='top' bgcolor='#003F7C'><font color='#FFFFFF' size='5'><strong>Barbados</strong></font></td> </tr> <tr> <td align='left' valign='top'><table border='0' cellspacing='0' cellpadding='0'> <tr> <td align='left' valign='top'><a href='http://www.mdgmonitor.org/factsheets_00.cfm?c=BRB'><img src='files/barbados.jpg' alt='image' width='200' border='0' align='left' /></a></td> <td align='left' valign='middle'><p><strong><font size='3'>Total Population (millions):</font> </strong>0.27</p><p><strong><font size'3'><a href='http://unstats.un.org/unsd/cdb/cdb_dict_xrxx.asp?def_code=63'>GDP</a> per capita (PPP US$):</font></strong> NA </p><p><font size='3'><strong>2006 <a href='http://hdr.undp.org/hdr2006/statistics/indices/default.cfm' target='_blank'>Human Development Index</a> (Rank 1-177):</strong> </font>31 </p></td> </tr> </table></td> </tr> <tr> <td align='left' valign='top'><font color='#003F7C' size='5'><strong>HIV/AIDS as a major challenge</strong></font></td> </tr> <tr> <td align='left' valign='top'><p><font color='#000000'>Barbados has achieved and surpassed most of its targets, specifically Goal Nos. 1 through 6. The biggest challenge to achieving the Millennium Development Goals is the HIV/AIDS pandemic. Within the last five years, the country has seen an overall increase in rates of infection, particularly among females aged 15-24. Like many other Caribbean nations, Barbados is witnessing a change in the epidemiology, from problems with communicable diseases to increasing difficulties in dealing with non-communicable diseases such as diabetes. Childhood and adult obesity is also causing a problem, adding to the burden of disease and disability.</font></p></td> </tr> <tr> <td align='left' valign='top'><a href='http://www.mdgmonitor.org/factsheets_00.cfm?c=BRB'>Read more... </a></td> </tr> <tr> <td align='right' valign='top'><p>Read related articles on <a href='http://news.google.com/archivesearch?hl=en&ned=us&q=barbados+and+%22millennium+development+goals%22&ie=UTF-8'>Google News</a></p></td> </tr> <tr> <td align='right' valign='top'>&nbsp;</td> </tr> <tr> <td align='center'><table border='0' cellpadding='0' cellspacing='0'> <tr> <td align='right' valign='middle'><a href='http://www.un.org/'><img src='files/un_logo_small.png' alt='UN logo' border='0' /></a></td> <td align='left' valign='middle'><font color='#666666'>The  <a href="http://www.un.org/millenniumgoals/" target="_blank">Millennium Development Goals </a>(MDGs) were laid out by the leaders of the world in 2000. They include  halving extreme poverty, halting the spread of HIV/AIDS and   providing universal primary education, all by 2015.</font></td> </tr> </table></td> </tr> </table>]]></description>
			<styleUrl>#text_photo_banner</styleUrl>
			<Point>
				<coordinates>-59.61,13.109999,0</coordinates>
			</Point>
		</Placemark>
		<Placemark>
			<name>Belarus</name>
			<visibility>0</visibility>
			<address>http://www.mdgmonitor.org/factsheets_00.cfm?c=BLR</address>
			<Snippet maxLines="2"></Snippet>
			<description><![CDATA[<table width='350' border='0' cellpadding='3' cellspacing='0' bgcolor='#FFFFFF'> <tr> <td align='left'><table border='0' cellspacing='0' cellpadding='0'> <tr> <td rowspan='2' align='left' valign='middle'><a href='http://www.mdgmonitor.org/'><img src='files/mdg_logo.png' alt='mdp logo' border='0' /></a></td> <td align='left' valign='bottom'><font color='#00486D' size='6'><b>MDG</b>MONITOR</td> </tr> <tr> <td align='right' valign='top'><font color='#00486D' size='4'>Track. Learn. Support.</font></td> </tr> </table></td> </tr> <tr> <td align='left' valign='top' bgcolor='#003F7C'><font color='#FFFFFF' size='5'><strong>Belarus</strong></font></td> </tr> <tr> <td align='left' valign='top'><table border='0' cellspacing='0' cellpadding='0'> <tr> <td align='left' valign='top'><a href='http://www.mdgmonitor.org/factsheets_00.cfm?c=BLR'><img src='files/belarus.jpg' alt='image' width='200' border='0' align='left' /></a></td> <td align='left' valign='middle'><p><strong><font size='3'>Total Population (millions):</font> </strong>9.76</p><p><strong><font size'3'><a href='http://unstats.un.org/unsd/cdb/cdb_dict_xrxx.asp?def_code=63'>GDP</a> per capita (PPP US$):</font></strong> 7883 </p><p><font size='3'><strong>2006 <a href='http://hdr.undp.org/hdr2006/statistics/indices/default.cfm' target='_blank'>Human Development Index</a> (Rank 1-177):</strong> </font>67 </p></td> </tr> </table></td> </tr> <tr> <td align='left' valign='top'><font color='#003F7C' size='5'><strong>A rural-urban divide</strong></font></td> </tr> <tr> <td align='left' valign='top'><p><font color='#000000'>In 2006, Belarus embarked on a series of MDG-related programmes, ranging from small urban community development to HIV/AIDS prevention to energy conservation.  Policy makers are addressing a number of setbacks as well. Child mortality in rural areas was found to be twice as high as  in cities – the result of significant gaps between rural and urban areas in health care.  Also, from 1990 to 2004, the number of deaths attributed to tuberculosis rose by 2.5 times, with rural inhabitants 1.5 times more likely to die from tuberculosis than their urban counterparts.</font></p></td> </tr> <tr> <td align='left' valign='top'><a href='http://www.mdgmonitor.org/factsheets_00.cfm?c=BLR'>Read more... </a></td> </tr> <tr> <td align='right' valign='top'><p>Read related articles on <a href='http://news.google.com/archivesearch?hl=en&ned=us&ie=UTF-8&q=belarus+and+%22millennium+development+goals%22'>Google News</a></p></td> </tr> <tr> <td align='right' valign='top'>&nbsp;</td> </tr> <tr> <td align='center'><table border='0' cellpadding='0' cellspacing='0'> <tr> <td align='right' valign='middle'><a href='http://www.un.org/'><img src='files/un_logo_small.png' alt='UN logo' border='0' /></a></td> <td align='left' valign='middle'><font color='#666666'>The  <a href="http://www.un.org/millenniumgoals/" target="_blank">Millennium Development Goals </a>(MDGs) were laid out by the leaders of the world in 2000. They include  halving extreme poverty, halting the spread of HIV/AIDS and   providing universal primary education, all by 2015.</font></td> </tr> </table></td> </tr> </table>]]></description>
			<styleUrl>#text_photo_banner</styleUrl>
			<Point>
				<coordinates>27.549999,53.90999900000001,0</coordinates>
			</Point>
		</Placemark>
		<Placemark>
			<name>Belize</name>
			<visibility>0</visibility>
			<address>http://www.mdgmonitor.org/factsheets_00.cfm?c=BLZ</address>
			<Snippet maxLines="2"></Snippet>
			<description><![CDATA[<table width='350' border='0' cellpadding='3' cellspacing='0' bgcolor='#FFFFFF'> <tr> <td align='left'><table border='0' cellspacing='0' cellpadding='0'> <tr> <td rowspan='2' align='left' valign='middle'><a href='http://www.mdgmonitor.org/'><img src='files/mdg_logo.png' alt='mdp logo' border='0' /></a></td> <td align='left' valign='bottom'><font color='#00486D' size='6'><b>MDG</b>MONITOR</td> </tr> <tr> <td align='right' valign='top'><font color='#00486D' size='4'>Track. Learn. Support.</font></td> </tr> </table></td> </tr> <tr> <td align='left' valign='top' bgcolor='#003F7C'><font color='#FFFFFF' size='5'><strong>Belize</strong></font></td> </tr> <tr> <td align='left' valign='top'><table border='0' cellspacing='0' cellpadding='0'> <tr> <td align='left' valign='top'><a href='http://www.mdgmonitor.org/factsheets_00.cfm?c=BLZ'><img src='files/belize.jpg' alt='image' width='200' border='0' align='left' /></a></td> <td align='left' valign='middle'><p><strong><font size='3'>Total Population (millions):</font> </strong>0.27</p><p><strong><font size'3'><a href='http://unstats.un.org/unsd/cdb/cdb_dict_xrxx.asp?def_code=63'>GDP</a> per capita (PPP US$):</font></strong> 7580 </p><p><font size='3'><strong>2006 <a href='http://hdr.undp.org/hdr2006/statistics/indices/default.cfm' target='_blank'>Human Development Index</a> (Rank 1-177):</strong> </font>95 </p></td> </tr> </table></td> </tr> <tr> <td align='left' valign='top'><font color='#003F7C' size='5'><strong>Rural areas and minorities</strong></font></td> </tr> <tr> <td align='left' valign='top'><p><font color='#000000'>Belize is a generally stable democratic country that has seen a smooth transition of political power every five years. The latest statistics on poverty show that 33.5% of the population is living in poverty, with higher rates in rural areas and among the indigenous Maya population. More efforts are being made to ensure that the MDGs are broadly disseminated and that they are adequately integrated into the government’s poverty reduction plan.</font></p></td> </tr> <tr> <td align='left' valign='top'><a href='http://www.mdgmonitor.org/factsheets_00.cfm?c=BLZ'>Read more... </a></td> </tr> <tr> <td align='right' valign='top'><p>Read related articles on <a href='http://news.google.com/archivesearch?hl=en&ned=us&ie=UTF-8&q=belize+%22millennium+development+goals%22'>Google News</a></p></td> </tr> <tr> <td align='right' valign='top'>&nbsp;</td> </tr> <tr> <td align='center'><table border='0' cellpadding='0' cellspacing='0'> <tr> <td align='right' valign='middle'><a href='http://www.un.org/'><img src='files/un_logo_small.png' alt='UN logo' border='0' /></a></td> <td align='left' valign='middle'><font color='#666666'>The  <a href="http://www.un.org/millenniumgoals/" target="_blank">Millennium Development Goals </a>(MDGs) were laid out by the leaders of the world in 2000. They include  halving extreme poverty, halting the spread of HIV/AIDS and   providing universal primary education, all by 2015.</font></td> </tr> </table></td> </tr> </table>]]></description>
			<styleUrl>#text_photo_banner</styleUrl>
			<Point>
				<coordinates>-88.79000000000001,17.25,0</coordinates>
			</Point>
		</Placemark>
		<Placemark>
			<name>Benin</name>
			<visibility>0</visibility>
			<address>http://www.mdgmonitor.org/factsheets_00.cfm?c=BEN</address>
			<Snippet maxLines="2"></Snippet>
			<description><![CDATA[<table width='350' border='0' cellpadding='3' cellspacing='0' bgcolor='#FFFFFF'> <tr> <td align='left'><table border='0' cellspacing='0' cellpadding='0'> <tr> <td rowspan='2' align='left' valign='middle'><a href='http://www.mdgmonitor.org/'><img src='files/mdg_logo.png' alt='mdp logo' border='0' /></a></td> <td align='left' valign='bottom'><font color='#00486D' size='6'><b>MDG</b>MONITOR</td> </tr> <tr> <td align='right' valign='top'><font color='#00486D' size='4'>Track. Learn. Support.</font></td> </tr> </table></td> </tr> <tr> <td align='left' valign='top' bgcolor='#003F7C'><font color='#FFFFFF' size='5'><strong>Benin</strong></font></td> </tr> <tr> <td align='left' valign='top'><table border='0' cellspacing='0' cellpadding='0'> <tr> <td align='left' valign='top'><a href='http://www.mdgmonitor.org/factsheets_00.cfm?c=BEN'><img src='files/benin.jpg' alt='image' width='200' border='0' align='left' /></a></td> <td align='left' valign='middle'><p><strong><font size='3'>Total Population (millions):</font> </strong>8.44</p><p><strong><font size'3'><a href='http://unstats.un.org/unsd/cdb/cdb_dict_xrxx.asp?def_code=63'>GDP</a> per capita (PPP US$):</font></strong> 1118 </p><p><font size='3'><strong>2006 <a href='http://hdr.undp.org/hdr2006/statistics/indices/default.cfm' target='_blank'>Human Development Index</a> (Rank 1-177):</strong> </font>163 </p></td> </tr> </table></td> </tr> <tr> <td align='left' valign='top'><font color='#003F7C' size='5'><strong>Progress in education and maternal health</strong></font></td> </tr> <tr> <td align='left' valign='top'><p><font color='#000000'>In 2006, the Government of Benin decided to focus on growth and the reduction of poverty in its development policymaking.  The percentage of Beninese living below the poverty line increased to 36 per cent between 2000 and 2006.Achievement of universal primary education (Goal No. 3) is showing  definite progress. The gap between the number of girls and boys in school has diminished considerably. The maternal mortality ratio is decreasing but achievement of Goal No. 5 is in doubt because expectant mothers have difficulty in obtaining prenatal care.</font></p></td> </tr> <tr> <td align='left' valign='top'><a href='http://www.mdgmonitor.org/factsheets_00.cfm?c=BEN'>Read more... </a></td> </tr> <tr> <td align='right' valign='top'><p>Read related articles on <a href='http://news.google.com/archivesearch?hl=en&ned=us&ie=UTF-8&q=benin+and+%22millennium+development+goals%22'>Google News</a></p></td> </tr> <tr> <td align='right' valign='top'>&nbsp;</td> </tr> <tr> <td align='center'><table border='0' cellpadding='0' cellspacing='0'> <tr> <td align='right' valign='middle'><a href='http://www.un.org/'><img src='files/un_logo_small.png' alt='UN logo' border='0' /></a></td> <td align='left' valign='middle'><font color='#666666'>The  <a href="http://www.un.org/millenniumgoals/" target="_blank">Millennium Development Goals </a>(MDGs) were laid out by the leaders of the world in 2000. They include  halving extreme poverty, halting the spread of HIV/AIDS and   providing universal primary education, all by 2015.</font></td> </tr> </table></td> </tr> </table>]]></description>
			<styleUrl>#text_photo_banner</styleUrl>
			<Point>
				<coordinates>2.63,6.48,0</coordinates>
			</Point>
		</Placemark>
		<Placemark>
			<name>Bhutan</name>
			<visibility>0</visibility>
			<address>http://www.mdgmonitor.org/factsheets_00.cfm?c=BTN</address>
			<Snippet maxLines="2"></Snippet>
			<description><![CDATA[<table width='350' border='0' cellpadding='3' cellspacing='0' bgcolor='#FFFFFF'> <tr> <td align='left'><table border='0' cellspacing='0' cellpadding='0'> <tr> <td rowspan='2' align='left' valign='middle'><a href='http://www.mdgmonitor.org/'><img src='files/mdg_logo.png' alt='mdp logo' border='0' /></a></td> <td align='left' valign='bottom'><font color='#00486D' size='6'><b>MDG</b>MONITOR</td> </tr> <tr> <td align='right' valign='top'><font color='#00486D' size='4'>Track. Learn. Support.</font></td> </tr> </table></td> </tr> <tr> <td align='left' valign='top' bgcolor='#003F7C'><font color='#FFFFFF' size='5'><strong>Bhutan</strong></font></td> </tr> <tr> <td align='left' valign='top'><table border='0' cellspacing='0' cellpadding='0'> <tr> <td align='left' valign='top'><a href='http://www.mdgmonitor.org/factsheets_00.cfm?c=BTN'><img src='files/bhutan.jpg' alt='image' width='200' border='0' align='left' /></a></td> <td align='left' valign='middle'><p><strong><font size='3'>Total Population (millions):</font> </strong>2.16</p><p><strong><font size'3'><a href='http://unstats.un.org/unsd/cdb/cdb_dict_xrxx.asp?def_code=63'>GDP</a> per capita (PPP US$):</font></strong> NA </p><p><font size='3'><strong>2006 <a href='http://hdr.undp.org/hdr2006/statistics/indices/default.cfm' target='_blank'>Human Development Index</a> (Rank 1-177):</strong> </font>135 </p></td> </tr> </table></td> </tr> <tr> <td align='left' valign='top'><font color='#003F7C' size='5'><strong>1/3 under the poverty line</strong></font></td> </tr> <tr> <td align='left' valign='top'><p><font color='#000000'>Bhutan has succeeded in halving the proportion of people without sustainable access to sanitation and safe drinking water, as well as halving the number of underweight children under age 5. But some goals, such as gender equality, will be difficult to meet, and the country still has relatively high levels of poverty. Overall, nearly one-third of the population still lives below the poverty line, with poverty much more widespread and severe in rural areas.</font></p></td> </tr> <tr> <td align='left' valign='top'><a href='http://www.mdgmonitor.org/factsheets_00.cfm?c=BTN'>Read more... </a></td> </tr> <tr> <td align='right' valign='top'><p>Read related articles on <a href='http://news.google.com/archivesearch?q=bhutan+and+%22millennium+development+goals%22&hl=en&ned=us&ie=UTF-8'>Google News</a></p></td> </tr> <tr> <td align='right' valign='top'>&nbsp;</td> </tr> <tr> <td align='center'><table border='0' cellpadding='0' cellspacing='0'> <tr> <td align='right' valign='middle'><a href='http://www.un.org/'><img src='files/un_logo_small.png' alt='UN logo' border='0' /></a></td> <td align='left' valign='middle'><font color='#666666'>The  <a href="http://www.un.org/millenniumgoals/" target="_blank">Millennium Development Goals </a>(MDGs) were laid out by the leaders of the world in 2000. They include  halving extreme poverty, halting the spread of HIV/AIDS and   providing universal primary education, all by 2015.</font></td> </tr> </table></td> </tr> </table>]]></description>
			<styleUrl>#text_photo_banner</styleUrl>
			<Point>
				<coordinates>89.699996,27.479999,0</coordinates>
			</Point>
		</Placemark>
		<Placemark>
			<name>Bolivia</name>
			<visibility>0</visibility>
			<address>http://www.mdgmonitor.org/factsheets_00.cfm?c=BOL</address>
			<Snippet maxLines="2"></Snippet>
			<description><![CDATA[<table width='350' border='0' cellpadding='3' cellspacing='0' bgcolor='#FFFFFF'> <tr> <td align='left'><table border='0' cellspacing='0' cellpadding='0'> <tr> <td rowspan='2' align='left' valign='middle'><a href='http://www.mdgmonitor.org/'><img src='files/mdg_logo.png' alt='mdp logo' border='0' /></a></td> <td align='left' valign='bottom'><font color='#00486D' size='6'><b>MDG</b>MONITOR</td> </tr> <tr> <td align='right' valign='top'><font color='#00486D' size='4'>Track. Learn. Support.</font></td> </tr> </table></td> </tr> <tr> <td align='left' valign='top' bgcolor='#003F7C'><font color='#FFFFFF' size='5'><strong>Bolivia</strong></font></td> </tr> <tr> <td align='left' valign='top'><table border='0' cellspacing='0' cellpadding='0'> <tr> <td align='left' valign='top'><a href='http://www.mdgmonitor.org/factsheets_00.cfm?c=BOL'><img src='files/bolivia.jpg' alt='image' width='200' border='0' align='left' /></a></td> <td align='left' valign='middle'><p><strong><font size='3'>Total Population (millions):</font> </strong>9.18</p><p><strong><font size'3'><a href='http://unstats.un.org/unsd/cdb/cdb_dict_xrxx.asp?def_code=63'>GDP</a> per capita (PPP US$):</font></strong> 2856 </p><p><font size='3'><strong>2006 <a href='http://hdr.undp.org/hdr2006/statistics/indices/default.cfm' target='_blank'>Human Development Index</a> (Rank 1-177):</strong> </font>115 </p></td> </tr> </table></td> </tr> <tr> <td align='left' valign='top'><font color='#003F7C' size='5'><strong>Better health but limited capacities</strong></font></td> </tr> <tr> <td align='left' valign='top'><p><font color='#000000'>In Bolivia, infant and maternal mortality have dropped considerably, thanks to the implementation of free maternal-infant health insurance policies. Programmes for immune-preventable illnesses have reduced rates of infestation for tuberculosis and other diseases. The main obstacles to achieving the MDGs include low rates of economic growth, fiscal constraints that have hampered social spending, limited decentralized public management capacity, and low rates of execution and lack of coordination for concurrent investment.</font></p></td> </tr> <tr> <td align='left' valign='top'><a href='http://www.mdgmonitor.org/factsheets_00.cfm?c=BOL'>Read more... </a></td> </tr> <tr> <td align='right' valign='top'><p>Read related articles on <a href='http://news.google.com/archivesearch?hl=en&ned=us&q=bolivia+and+%22millennium+development+goals%22&ie=UTF-8'>Google News</a></p></td> </tr> <tr> <td align='right' valign='top'>&nbsp;</td> </tr> <tr> <td align='center'><table border='0' cellpadding='0' cellspacing='0'> <tr> <td align='right' valign='middle'><a href='http://www.un.org/'><img src='files/un_logo_small.png' alt='UN logo' border='0' /></a></td> <td align='left' valign='middle'><font color='#666666'>The  <a href="http://www.un.org/millenniumgoals/" target="_blank">Millennium Development Goals </a>(MDGs) were laid out by the leaders of the world in 2000. They include  halving extreme poverty, halting the spread of HIV/AIDS and   providing universal primary education, all by 2015.</font></td> </tr> </table></td> </tr> </table>]]></description>
			<styleUrl>#text_photo_banner</styleUrl>
			<Point>
				<coordinates>-68.150001,-16.5,0</coordinates>
			</Point>
		</Placemark>
		<Placemark>
			<name>Bosnia &amp; Herzegovina</name>
			<visibility>0</visibility>
			<address>http://www.mdgmonitor.org/factsheets_00.cfm?c=BIH</address>
			<Snippet maxLines="2"></Snippet>
			<description><![CDATA[<table width='350' border='0' cellpadding='3' cellspacing='0' bgcolor='#FFFFFF'> <tr> <td align='left'><table border='0' cellspacing='0' cellpadding='0'> <tr> <td rowspan='2' align='left' valign='middle'><a href='http://www.mdgmonitor.org/'><img src='files/mdg_logo.png' alt='mdp logo' border='0' /></a></td> <td align='left' valign='bottom'><font color='#00486D' size='6'><b>MDG</b>MONITOR</td> </tr> <tr> <td align='right' valign='top'><font color='#00486D' size='4'>Track. Learn. Support.</font></td> </tr> </table></td> </tr> <tr> <td align='left' valign='top' bgcolor='#003F7C'><font color='#FFFFFF' size='5'><strong>Bosnia & Herzegovina</strong></font></td> </tr> <tr> <td align='left' valign='top'><table border='0' cellspacing='0' cellpadding='0'> <tr> <td align='left' valign='top'><a href='http://www.mdgmonitor.org/factsheets_00.cfm?c=BIH'><img src='files/bosnia.JPG' alt='image' width='200' border='0' align='left' /></a></td> <td align='left' valign='middle'><p><strong><font size='3'>Total Population (millions):</font> </strong>3.91</p><p><strong><font size'3'><a href='http://unstats.un.org/unsd/cdb/cdb_dict_xrxx.asp?def_code=63'>GDP</a> per capita (PPP US$):</font></strong> 7630 </p><p><font size='3'><strong>2006 <a href='http://hdr.undp.org/hdr2006/statistics/indices/default.cfm' target='_blank'>Human Development Index</a> (Rank 1-177):</strong> </font>62 </p></td> </tr> </table></td> </tr> <tr> <td align='left' valign='top'><font color='#003F7C' size='5'><strong>EU accession</strong></font></td> </tr> <tr> <td align='left' valign='top'><p><font color='#000000'>Membership of the European Union (EU) is both central to achieving these objectives and an end in itself. The accession process presents both the opportunity and the means by which the citizens of Bosnia and Herzegovina can come to enjoy the same economic prosperity and the social entitlements enjoyed by other Europeans.</font></p></td> </tr> <tr> <td align='left' valign='top'><a href='http://www.mdgmonitor.org/factsheets_00.cfm?c=BIH'>Read more... </a></td> </tr> <tr> <td align='right' valign='top'><p>Read related articles on <a href='http://news.google.com/archivesearch?hl=en&ned=us&ie=UTF-8&q=bosnia+and+%22millennium+development+goals%22'>Google News</a></p></td> </tr> <tr> <td align='right' valign='top'>&nbsp;</td> </tr> <tr> <td align='center'><table border='0' cellpadding='0' cellspacing='0'> <tr> <td align='right' valign='middle'><a href='http://www.un.org/'><img src='files/un_logo_small.png' alt='UN logo' border='0' /></a></td> <td align='left' valign='middle'><font color='#666666'>The  <a href="http://www.un.org/millenniumgoals/" target="_blank">Millennium Development Goals </a>(MDGs) were laid out by the leaders of the world in 2000. They include  halving extreme poverty, halting the spread of HIV/AIDS and   providing universal primary education, all by 2015.</font></td> </tr> </table></td> </tr> </table>]]></description>
			<styleUrl>#text_photo_banner</styleUrl>
			<Point>
				<coordinates>18.379999,43.849998,0</coordinates>
			</Point>
		</Placemark>
		<Placemark>
			<name>Botswana</name>
			<visibility>0</visibility>
			<address>http://www.mdgmonitor.org/factsheets_00.cfm?c=BWA</address>
			<Snippet maxLines="2"></Snippet>
			<description><![CDATA[<table width='350' border='0' cellpadding='3' cellspacing='0' bgcolor='#FFFFFF'> <tr> <td align='left'><table border='0' cellspacing='0' cellpadding='0'> <tr> <td rowspan='2' align='left' valign='middle'><a href='http://www.mdgmonitor.org/'><img src='files/mdg_logo.png' alt='mdp logo' border='0' /></a></td> <td align='left' valign='bottom'><font color='#00486D' size='6'><b>MDG</b>MONITOR</td> </tr> <tr> <td align='right' valign='top'><font color='#00486D' size='4'>Track. Learn. Support.</font></td> </tr> </table></td> </tr> <tr> <td align='left' valign='top' bgcolor='#003F7C'><font color='#FFFFFF' size='5'><strong>Botswana</strong></font></td> </tr> <tr> <td align='left' valign='top'><table border='0' cellspacing='0' cellpadding='0'> <tr> <td align='left' valign='top'><a href='http://www.mdgmonitor.org/factsheets_00.cfm?c=BWA'><img src='files/botswana.jpg' alt='image' width='200' border='0' align='left' /></a></td> <td align='left' valign='middle'><p><strong><font size='3'>Total Population (millions):</font> </strong>1.76</p><p><strong><font size'3'><a href='http://unstats.un.org/unsd/cdb/cdb_dict_xrxx.asp?def_code=63'>GDP</a> per capita (PPP US$):</font></strong> 10790 </p><p><font size='3'><strong>2006 <a href='http://hdr.undp.org/hdr2006/statistics/indices/default.cfm' target='_blank'>Human Development Index</a> (Rank 1-177):</strong> </font>131 </p></td> </tr> </table></td> </tr> <tr> <td align='left' valign='top'><font color='#003F7C' size='5'><strong>Spectacular achievements</strong></font></td> </tr> <tr> <td align='left' valign='top'><p><font color='#000000'>Since its independence more than two decades ago, Botswana has moved from a least developed to an upper middle-income country. The most spectacular area of success has been in education, where universal access to 10 years of schooling is now assured for boys and girls alike. The country has generally done well in improving access to basic services, e.g. health, and water and sanitation. HIV/AIDS remains the most important challenge.</font></p></td> </tr> <tr> <td align='left' valign='top'><a href='http://www.mdgmonitor.org/factsheets_00.cfm?c=BWA'>Read more... </a></td> </tr> <tr> <td align='right' valign='top'><p>Read related articles on <a href='http://news.google.com/archivesearch?hl=en&ned=us&ie=UTF-8&q=botswana+and+%22millennium+development+goals%22'>Google News</a></p></td> </tr> <tr> <td align='right' valign='top'>&nbsp;</td> </tr> <tr> <td align='center'><table border='0' cellpadding='0' cellspacing='0'> <tr> <td align='right' valign='middle'><a href='http://www.un.org/'><img src='files/un_logo_small.png' alt='UN logo' border='0' /></a></td> <td align='left' valign='middle'><font color='#666666'>The  <a href="http://www.un.org/millenniumgoals/" target="_blank">Millennium Development Goals </a>(MDGs) were laid out by the leaders of the world in 2000. They include  halving extreme poverty, halting the spread of HIV/AIDS and   providing universal primary education, all by 2015.</font></td> </tr> </table></td> </tr> </table>]]></description>
			<styleUrl>#text_photo_banner</styleUrl>
			<Point>
				<coordinates>25.909999,-24.64999900000002,0</coordinates>
			</Point>
		</Placemark>
		<Placemark>
			<name>Brazil</name>
			<visibility>0</visibility>
			<address>http://www.mdgmonitor.org/factsheets_00.cfm?c=BRA</address>
			<Snippet maxLines="2"></Snippet>
			<description><![CDATA[<table width='350' border='0' cellpadding='3' cellspacing='0' bgcolor='#FFFFFF'> <tr> <td align='left'><table border='0' cellspacing='0' cellpadding='0'> <tr> <td rowspan='2' align='left' valign='middle'><a href='http://www.mdgmonitor.org/'><img src='files/mdg_logo.png' alt='mdp logo' border='0' /></a></td> <td align='left' valign='bottom'><font color='#00486D' size='6'><b>MDG</b>MONITOR</td> </tr> <tr> <td align='right' valign='top'><font color='#00486D' size='4'>Track. Learn. Support.</font></td> </tr> </table></td> </tr> <tr> <td align='left' valign='top' bgcolor='#003F7C'><font color='#FFFFFF' size='5'><strong>Brazil</strong></font></td> </tr> <tr> <td align='left' valign='top'><table border='0' cellspacing='0' cellpadding='0'> <tr> <td align='left' valign='top'><a href='http://www.mdgmonitor.org/factsheets_00.cfm?c=BRA'><img src='files/brazil.jpg' alt='image' width='200' border='0' align='left' /></a></td> <td align='left' valign='middle'><p><strong><font size='3'>Total Population (millions):</font> </strong>186.4</p><p><strong><font size'3'><a href='http://unstats.un.org/unsd/cdb/cdb_dict_xrxx.asp?def_code=63'>GDP</a> per capita (PPP US$):</font></strong> 8730 </p><p><font size='3'><strong>2006 <a href='http://hdr.undp.org/hdr2006/statistics/indices/default.cfm' target='_blank'>Human Development Index</a> (Rank 1-177):</strong> </font>69 </p></td> </tr> </table></td> </tr> <tr> <td align='left' valign='top'><font color='#003F7C' size='5'><strong>Inequality as a major issue</strong></font></td> </tr> <tr> <td align='left' valign='top'><p><font color='#000000'>Difficulties have risen in Brazil because of the excessive levels of inequality and disparity in Brazilian society and among geographical regions. For example, access to education has improved, resulting in nearly universal enrolment in elementary school. But the quality of basic education must be improved, since a large number of children finish grade 4 without having acquired adequate reading and writing skills. Women have already reached a higher schooling level than men in Brazil, but discrimination exists in the labour market and their presence among political leaders.</font></p></td> </tr> <tr> <td align='left' valign='top'><a href='http://www.mdgmonitor.org/factsheets_00.cfm?c=BRA'>Read more... </a></td> </tr> <tr> <td align='right' valign='top'><p>Read related articles on <a href='http://news.google.com/news?hl=en&ned=us&q=brazil+and+%22millennium+development+goals%22'>Google News</a></p></td> </tr> <tr> <td align='right' valign='top'>&nbsp;</td> </tr> <tr> <td align='center'><table border='0' cellpadding='0' cellspacing='0'> <tr> <td align='right' valign='middle'><a href='http://www.un.org/'><img src='files/un_logo_small.png' alt='UN logo' border='0' /></a></td> <td align='left' valign='middle'><font color='#666666'>The  <a href="http://www.un.org/millenniumgoals/" target="_blank">Millennium Development Goals </a>(MDGs) were laid out by the leaders of the world in 2000. They include  halving extreme poverty, halting the spread of HIV/AIDS and   providing universal primary education, all by 2015.</font></td> </tr> </table></td> </tr> </table>]]></description>
			<styleUrl>#text_photo_banner</styleUrl>
			<Point>
				<coordinates>-47.909999,-15.779999,0</coordinates>
			</Point>
		</Placemark>
		<Placemark>
			<name>Bulgaria</name>
			<visibility>0</visibility>
			<address>http://www.mdgmonitor.org/factsheets_00.cfm?c=BGR</address>
			<Snippet maxLines="2"></Snippet>
			<description><![CDATA[<table width='350' border='0' cellpadding='3' cellspacing='0' bgcolor='#FFFFFF'> <tr> <td align='left'><table border='0' cellspacing='0' cellpadding='0'> <tr> <td rowspan='2' align='left' valign='middle'><a href='http://www.mdgmonitor.org/'><img src='files/mdg_logo.png' alt='mdp logo' border='0' /></a></td> <td align='left' valign='bottom'><font color='#00486D' size='6'><b>MDG</b>MONITOR</td> </tr> <tr> <td align='right' valign='top'><font color='#00486D' size='4'>Track. Learn. Support.</font></td> </tr> </table></td> </tr> <tr> <td align='left' valign='top' bgcolor='#003F7C'><font color='#FFFFFF' size='5'><strong>Bulgaria</strong></font></td> </tr> <tr> <td align='left' valign='top'><table border='0' cellspacing='0' cellpadding='0'> <tr> <td align='left' valign='top'><a href='http://www.mdgmonitor.org/factsheets_00.cfm?c=BGR'><img src='files/bulgaria.jpg' alt='image' width='200' border='0' align='left' /></a></td> <td align='left' valign='middle'><p><strong><font size='3'>Total Population (millions):</font> </strong>7.73</p><p><strong><font size'3'><a href='http://unstats.un.org/unsd/cdb/cdb_dict_xrxx.asp?def_code=63'>GDP</a> per capita (PPP US$):</font></strong> 8794 </p><p><font size='3'><strong>2006 <a href='http://hdr.undp.org/hdr2006/statistics/indices/default.cfm' target='_blank'>Human Development Index</a> (Rank 1-177):</strong> </font>54 </p></td> </tr> </table></td> </tr> <tr> <td align='left' valign='top'><font color='#003F7C' size='5'><strong>Health and education as a challenge</strong></font></td> </tr> <tr> <td align='left' valign='top'><p><font color='#000000'>Some MDG indicators in Bulgaria, such as education and unemployment, are close to European Union averages, but others are well below. These include average monthly income, child mortality and maternal mortality.  Bulgaria is experiencing a demographic transition, with the school-age population shrinking substantially. A generous education infrastructure remains from the period before the transition, but the number of students declined by more than 25 percent between 1992 and 2005, forcing many municipalities to close their schools. Funding for health care is also an important challenge.</font></p></td> </tr> <tr> <td align='left' valign='top'><a href='http://www.mdgmonitor.org/factsheets_00.cfm?c=BGR'>Read more... </a></td> </tr> <tr> <td align='right' valign='top'><p>Read related articles on <a href='http://news.google.com/archivesearch?hl=en&ned=us&q=bulgaria+and+%22millennium+development+goals%22&ie=UTF-8'>Google News</a></p></td> </tr> <tr> <td align='right' valign='top'>&nbsp;</td> </tr> <tr> <td align='center'><table border='0' cellpadding='0' cellspacing='0'> <tr> <td align='right' valign='middle'><a href='http://www.un.org/'><img src='files/un_logo_small.png' alt='UN logo' border='0' /></a></td> <td align='left' valign='middle'><font color='#666666'>The  <a href="http://www.un.org/millenniumgoals/" target="_blank">Millennium Development Goals </a>(MDGs) were laid out by the leaders of the world in 2000. They include  halving extreme poverty, halting the spread of HIV/AIDS and   providing universal primary education, all by 2015.</font></td> </tr> </table></td> </tr> </table>]]></description>
			<styleUrl>#text_photo_banner</styleUrl>
			<Point>
				<coordinates>23.309999,42.689998,0</coordinates>
			</Point>
		</Placemark>
		<Placemark>
			<name>Burkina Faso</name>
			<visibility>0</visibility>
			<address>http://www.mdgmonitor.org/factsheets_00.cfm?c=BFA</address>
			<Snippet maxLines="2"></Snippet>
			<description><![CDATA[<table width='350' border='0' cellpadding='3' cellspacing='0' bgcolor='#FFFFFF'> <tr> <td align='left'><table border='0' cellspacing='0' cellpadding='0'> <tr> <td rowspan='2' align='left' valign='middle'><a href='http://www.mdgmonitor.org/'><img src='files/mdg_logo.png' alt='mdp logo' border='0' /></a></td> <td align='left' valign='bottom'><font color='#00486D' size='6'><b>MDG</b>MONITOR</td> </tr> <tr> <td align='right' valign='top'><font color='#00486D' size='4'>Track. Learn. Support.</font></td> </tr> </table></td> </tr> <tr> <td align='left' valign='top' bgcolor='#003F7C'><font color='#FFFFFF' size='5'><strong>Burkina Faso</strong></font></td> </tr> <tr> <td align='left' valign='top'><table border='0' cellspacing='0' cellpadding='0'> <tr> <td align='left' valign='top'><a href='http://www.mdgmonitor.org/factsheets_00.cfm?c=BFA'><img src='files/burkina.jpg' alt='image' width='200' border='0' align='left' /></a></td> <td align='left' valign='middle'><p><strong><font size='3'>Total Population (millions):</font> </strong>13.23</p><p><strong><font size'3'><a href='http://unstats.un.org/unsd/cdb/cdb_dict_xrxx.asp?def_code=63'>GDP</a> per capita (PPP US$):</font></strong> 1222 </p><p><font size='3'><strong>2006 <a href='http://hdr.undp.org/hdr2006/statistics/indices/default.cfm' target='_blank'>Human Development Index</a> (Rank 1-177):</strong> </font>174 </p></td> </tr> </table></td> </tr> <tr> <td align='left' valign='top'><font color='#003F7C' size='5'><strong>Diversifying the economy, reducing population growth</strong></font></td> </tr> <tr> <td align='left' valign='top'><p><font color='#000000'>The attainment of the Millennium Development Goals in Burkina Faso depends on the reduction of gender inequalities; slower population growth; and diversification of the economy. Thanks to sectoral approaches in education, health, and water and sanitation, the gross rate of school enrolment rose to 60.9 percent in 2006, and the infant mortality rate declined from 105 per 1,000 live births in 1998 to 81 per 1,000 in 2003. Access to drinking water reached 74 percent in 2005.</font></p></td> </tr> <tr> <td align='left' valign='top'><a href='http://www.mdgmonitor.org/factsheets_00.cfm?c=BFA'>Read more... </a></td> </tr> <tr> <td align='right' valign='top'><p>Read related articles on <a href='http://news.google.com/archivesearch?hl=en&ned=us&q=burkina+faso+and+%22millennium+development+goals%22&ie=UTF-8'>Google News</a></p></td> </tr> <tr> <td align='right' valign='top'>&nbsp;</td> </tr> <tr> <td align='center'><table border='0' cellpadding='0' cellspacing='0'> <tr> <td align='right' valign='middle'><a href='http://www.un.org/'><img src='files/un_logo_small.png' alt='UN logo' border='0' /></a></td> <td align='left' valign='middle'><font color='#666666'>The  <a href="http://www.un.org/millenniumgoals/" target="_blank">Millennium Development Goals </a>(MDGs) were laid out by the leaders of the world in 2000. They include  halving extreme poverty, halting the spread of HIV/AIDS and   providing universal primary education, all by 2015.</font></td> </tr> </table></td> </tr> </table>]]></description>
			<styleUrl>#text_photo_banner</styleUrl>
			<Point>
				<coordinates>-1.529999,12.369999,0</coordinates>
			</Point>
		</Placemark>
		<Placemark>
			<name>Cambodia</name>
			<visibility>0</visibility>
			<address>http://www.mdgmonitor.org/factsheets_00.cfm?c=KHM</address>
			<Snippet maxLines="2"></Snippet>
			<description><![CDATA[<table width='350' border='0' cellpadding='3' cellspacing='0' bgcolor='#FFFFFF'> <tr> <td align='left'><table border='0' cellspacing='0' cellpadding='0'> <tr> <td rowspan='2' align='left' valign='middle'><a href='http://www.mdgmonitor.org/'><img src='files/mdg_logo.png' alt='mdp logo' border='0' /></a></td> <td align='left' valign='bottom'><font color='#00486D' size='6'><b>MDG</b>MONITOR</td> </tr> <tr> <td align='right' valign='top'><font color='#00486D' size='4'>Track. Learn. Support.</font></td> </tr> </table></td> </tr> <tr> <td align='left' valign='top' bgcolor='#003F7C'><font color='#FFFFFF' size='5'><strong>Cambodia</strong></font></td> </tr> <tr> <td align='left' valign='top'><table border='0' cellspacing='0' cellpadding='0'> <tr> <td align='left' valign='top'><a href='http://www.mdgmonitor.org/factsheets_00.cfm?c=KHM'><img src='files/cambodia.jpg' alt='image' width='200' border='0' align='left' /></a></td> <td align='left' valign='middle'><p><strong><font size='3'>Total Population (millions):</font> </strong>14.07</p><p><strong><font size'3'><a href='http://unstats.un.org/unsd/cdb/cdb_dict_xrxx.asp?def_code=63'>GDP</a> per capita (PPP US$):</font></strong> 2595 </p><p><font size='3'><strong>2006 <a href='http://hdr.undp.org/hdr2006/statistics/indices/default.cfm' target='_blank'>Human Development Index</a> (Rank 1-177):</strong> </font>129 </p></td> </tr> </table></td> </tr> <tr> <td align='left' valign='top'><font color='#003F7C' size='5'><strong>Rural poverty</strong></font></td> </tr> <tr> <td align='left' valign='top'><p><font color='#000000'>Cambodia is on track on a number of MDG targets, including school enrolment rates and HIV/AIDS. The national poverty rate is still far behind the target, however. Child mortality and maternal mortality are high, and domestic violence has increased. The biggest challenge for Cambodia lies in rural poverty. While the country has experienced economic growth (averaging more than 10 percent for the last three years), it also faces greater inequality. The national poverty level remains at 35 percent of the population, while in some areas the poverty rate is as high as 60 percent.</font></p></td> </tr> <tr> <td align='left' valign='top'><a href='http://www.mdgmonitor.org/factsheets_00.cfm?c=KHM'>Read more... </a></td> </tr> <tr> <td align='right' valign='top'><p>Read related articles on <a href='http://news.google.com/archivesearch?hl=en&ned=us&q=cambodia+and+%22millennium+development+goals%22&ie=UTF-8'>Google News</a></p></td> </tr> <tr> <td align='right' valign='top'>&nbsp;</td> </tr> <tr> <td align='center'><table border='0' cellpadding='0' cellspacing='0'> <tr> <td align='right' valign='middle'><a href='http://www.un.org/'><img src='files/un_logo_small.png' alt='UN logo' border='0' /></a></td> <td align='left' valign='middle'><font color='#666666'>The  <a href="http://www.un.org/millenniumgoals/" target="_blank">Millennium Development Goals </a>(MDGs) were laid out by the leaders of the world in 2000. They include  halving extreme poverty, halting the spread of HIV/AIDS and   providing universal primary education, all by 2015.</font></td> </tr> </table></td> </tr> </table>]]></description>
			<styleUrl>#text_photo_banner</styleUrl>
			<Point>
				<coordinates>104.917445,11.558831,0</coordinates>
			</Point>
		</Placemark>
		<Placemark>
			<name>Cameroon</name>
			<visibility>0</visibility>
			<address>http://www.mdgmonitor.org/factsheets_00.cfm?c=CMR</address>
			<Snippet maxLines="2"></Snippet>
			<description><![CDATA[<table width='350' border='0' cellpadding='3' cellspacing='0' bgcolor='#FFFFFF'> <tr> <td align='left'><table border='0' cellspacing='0' cellpadding='0'> <tr> <td rowspan='2' align='left' valign='middle'><a href='http://www.mdgmonitor.org/'><img src='files/mdg_logo.png' alt='mdp logo' border='0' /></a></td> <td align='left' valign='bottom'><font color='#00486D' size='6'><b>MDG</b>MONITOR</td> </tr> <tr> <td align='right' valign='top'><font color='#00486D' size='4'>Track. Learn. Support.</font></td> </tr> </table></td> </tr> <tr> <td align='left' valign='top' bgcolor='#003F7C'><font color='#FFFFFF' size='5'><strong>Cameroon</strong></font></td> </tr> <tr> <td align='left' valign='top'><table border='0' cellspacing='0' cellpadding='0'> <tr> <td align='left' valign='top'><a href='http://www.mdgmonitor.org/factsheets_00.cfm?c=CMR'><img src='files/cameroon.jpg' alt='image' width='200' border='0' align='left' /></a></td> <td align='left' valign='middle'><p><strong><font size='3'>Total Population (millions):</font> </strong>16.32</p><p><strong><font size'3'><a href='http://unstats.un.org/unsd/cdb/cdb_dict_xrxx.asp?def_code=63'>GDP</a> per capita (PPP US$):</font></strong> 2211 </p><p><font size='3'><strong>2006 <a href='http://hdr.undp.org/hdr2006/statistics/indices/default.cfm' target='_blank'>Human Development Index</a> (Rank 1-177):</strong> </font>144 </p></td> </tr> </table></td> </tr> <tr> <td align='left' valign='top'><font color='#003F7C' size='5'><strong>Accelerating economic growth</strong></font></td> </tr> <tr> <td align='left' valign='top'><p><font color='#000000'>Cameroon has not yet reached the level of economic growth required to achieve the MDGs by 2015. A number of constraints stand in the way. Some include disparities in the allocation of public resources and a sluggish business climate reflecting a lack of suitable incentives.  Among the initiatives in the works are a programme for changing behaviour with a view to combating corruption, a plan for reducing grass-roots poverty, and the launching of major policy undertakings to create jobs.</font></p></td> </tr> <tr> <td align='left' valign='top'><a href='http://www.mdgmonitor.org/factsheets_00.cfm?c=CMR'>Read more... </a></td> </tr> <tr> <td align='right' valign='top'><p>Read related articles on <a href='http://news.google.com/archivesearch?q=cameroon+and+%22millennium+development+goals%22&hl=en&ned=us&ie=UTF-8'>Google News</a></p></td> </tr> <tr> <td align='right' valign='top'>&nbsp;</td> </tr> <tr> <td align='center'><table border='0' cellpadding='0' cellspacing='0'> <tr> <td align='right' valign='middle'><a href='http://www.un.org/'><img src='files/un_logo_small.png' alt='UN logo' border='0' /></a></td> <td align='left' valign='middle'><font color='#666666'>The  <a href="http://www.un.org/millenniumgoals/" target="_blank">Millennium Development Goals </a>(MDGs) were laid out by the leaders of the world in 2000. They include  halving extreme poverty, halting the spread of HIV/AIDS and   providing universal primary education, all by 2015.</font></td> </tr> </table></td> </tr> </table>]]></description>
			<styleUrl>#text_photo_banner</styleUrl>
			<Point>
				<coordinates>11.52,3.869999,0</coordinates>
			</Point>
		</Placemark>
		<Placemark>
			<name>Cape Verde</name>
			<visibility>0</visibility>
			<address>http://www.mdgmonitor.org/factsheets_00.cfm?c=CPV</address>
			<Snippet maxLines="2"></Snippet>
			<description><![CDATA[<table width='350' border='0' cellpadding='3' cellspacing='0' bgcolor='#FFFFFF'> <tr> <td align='left'><table border='0' cellspacing='0' cellpadding='0'> <tr> <td rowspan='2' align='left' valign='middle'><a href='http://www.mdgmonitor.org/'><img src='files/mdg_logo.png' alt='mdp logo' border='0' /></a></td> <td align='left' valign='bottom'><font color='#00486D' size='6'><b>MDG</b>MONITOR</td> </tr> <tr> <td align='right' valign='top'><font color='#00486D' size='4'>Track. Learn. Support.</font></td> </tr> </table></td> </tr> <tr> <td align='left' valign='top' bgcolor='#003F7C'><font color='#FFFFFF' size='5'><strong>Cape Verde</strong></font></td> </tr> <tr> <td align='left' valign='top'><table border='0' cellspacing='0' cellpadding='0'> <tr> <td align='left' valign='top'><a href='http://www.mdgmonitor.org/factsheets_00.cfm?c=CPV'><img src='files/capeverde.jpg' alt='image' width='200' border='0' align='left' /></a></td> <td align='left' valign='middle'><p><strong><font size='3'>Total Population (millions):</font> </strong>0.51</p><p><strong><font size'3'><a href='http://unstats.un.org/unsd/cdb/cdb_dict_xrxx.asp?def_code=63'>GDP</a> per capita (PPP US$):</font></strong> 6523 </p><p><font size='3'><strong>2006 <a href='http://hdr.undp.org/hdr2006/statistics/indices/default.cfm' target='_blank'>Human Development Index</a> (Rank 1-177):</strong> </font>106 </p></td> </tr> </table></td> </tr> <tr> <td align='left' valign='top'><font color='#003F7C' size='5'><strong>Inequalities and geographic disparities</strong></font></td> </tr> <tr> <td align='left' valign='top'><p><font color='#000000'>Encouraging results have been achieved in Cape Verde. Extreme poverty and poverty have been reduced. The universal education has been achieved, and there has been progress in ensuring greater autonomy for women. Maternal mortality and infant mortality for children under five years of age have fallen more rapidly than anticipated. Access to drinking water has substantially improved. However, the spread of HIV/AIDS has not yet been halted, and unemployment among young people continues to cause concern.  In 2006, the Prime Minister reaffirmed the importance of the MDGs in Cape Verde, with a focus on eliminating inequalities and geographical disparities.</font></p></td> </tr> <tr> <td align='left' valign='top'><a href='http://www.mdgmonitor.org/factsheets_00.cfm?c=CPV'>Read more... </a></td> </tr> <tr> <td align='right' valign='top'><p>Read related articles on <a href='http://news.google.com/archivesearch?hl=en&ned=us&q=cape+verde+and+%22millennium+development+goals%22&ie=UTF-8'>Google News</a></p></td> </tr> <tr> <td align='right' valign='top'>&nbsp;</td> </tr> <tr> <td align='center'><table border='0' cellpadding='0' cellspacing='0'> <tr> <td align='right' valign='middle'><a href='http://www.un.org/'><img src='files/un_logo_small.png' alt='UN logo' border='0' /></a></td> <td align='left' valign='middle'><font color='#666666'>The  <a href="http://www.un.org/millenniumgoals/" target="_blank">Millennium Development Goals </a>(MDGs) were laid out by the leaders of the world in 2000. They include  halving extreme poverty, halting the spread of HIV/AIDS and   providing universal primary education, all by 2015.</font></td> </tr> </table></td> </tr> </table>]]></description>
			<styleUrl>#text_photo_banner</styleUrl>
			<Point>
				<coordinates>-23.54,14.93,0</coordinates>
			</Point>
		</Placemark>
		<Placemark>
			<name>Central African Republic</name>
			<visibility>0</visibility>
			<address>http://www.mdgmonitor.org/factsheets_00.cfm?c=CAF</address>
			<Snippet maxLines="2"></Snippet>
			<description><![CDATA[<table width='350' border='0' cellpadding='3' cellspacing='0' bgcolor='#FFFFFF'> <tr> <td align='left'><table border='0' cellspacing='0' cellpadding='0'> <tr> <td rowspan='2' align='left' valign='middle'><a href='http://www.mdgmonitor.org/'><img src='files/mdg_logo.png' alt='mdp logo' border='0' /></a></td> <td align='left' valign='bottom'><font color='#00486D' size='6'><b>MDG</b>MONITOR</td> </tr> <tr> <td align='right' valign='top'><font color='#00486D' size='4'>Track. Learn. Support.</font></td> </tr> </table></td> </tr> <tr> <td align='left' valign='top' bgcolor='#003F7C'><font color='#FFFFFF' size='5'><strong>Central African Republic</strong></font></td> </tr> <tr> <td align='left' valign='top'><table border='0' cellspacing='0' cellpadding='0'> <tr> <td align='left' valign='top'><a href='http://www.mdgmonitor.org/factsheets_00.cfm?c=CAF'><img src='files/centralafricanrepublic.jpg' alt='image' width='200' border='0' align='left' /></a></td> <td align='left' valign='middle'><p><strong><font size='3'>Total Population (millions):</font> </strong>4.04</p><p><strong><font size'3'><a href='http://unstats.un.org/unsd/cdb/cdb_dict_xrxx.asp?def_code=63'>GDP</a> per capita (PPP US$):</font></strong> 1145 </p><p><font size='3'><strong>2006 <a href='http://hdr.undp.org/hdr2006/statistics/indices/default.cfm' target='_blank'>Human Development Index</a> (Rank 1-177):</strong> </font>172 </p></td> </tr> </table></td> </tr> <tr> <td align='left' valign='top'><font color='#003F7C' size='5'><strong>Weathering crises</strong></font></td> </tr> <tr> <td align='left' valign='top'><p><font color='#000000'>As a country emerging from conflict, the Central African Republic has weathered a number of crises over the last few years. Numerous challenges will need to be addressed in order to achieve the MDGs at the domestic level. The most important are: an increase in the volume and efficiency of foreign aid in order to meet needs; strong pro-poor growth to relaunch the economy and improve the level of human development; and the strengthening of security and the promotion of sound governance.</font></p></td> </tr> <tr> <td align='left' valign='top'><a href='http://www.mdgmonitor.org/factsheets_00.cfm?c=CAF'>Read more... </a></td> </tr> <tr> <td align='right' valign='top'><p>Read related articles on <a href='http://news.google.com/archivesearch?hl=en&ned=us&ie=UTF-8&q=%22central+african+republic%22+and+%22millennium+development+goals%22'>Google News</a></p></td> </tr> <tr> <td align='right' valign='top'>&nbsp;</td> </tr> <tr> <td align='center'><table border='0' cellpadding='0' cellspacing='0'> <tr> <td align='right' valign='middle'><a href='http://www.un.org/'><img src='files/un_logo_small.png' alt='UN logo' border='0' /></a></td> <td align='left' valign='middle'><font color='#666666'>The  <a href="http://www.un.org/millenniumgoals/" target="_blank">Millennium Development Goals </a>(MDGs) were laid out by the leaders of the world in 2000. They include  halving extreme poverty, halting the spread of HIV/AIDS and   providing universal primary education, all by 2015.</font></td> </tr> </table></td> </tr> </table>]]></description>
			<styleUrl>#text_photo_banner</styleUrl>
			<Point>
				<coordinates>18.559999,4.36,0</coordinates>
			</Point>
		</Placemark>
		<Placemark>
			<name>Chad</name>
			<visibility>0</visibility>
			<address>http://www.mdgmonitor.org/factsheets_00.cfm?c=TCD</address>
			<Snippet maxLines="2"></Snippet>
			<description><![CDATA[<table width='350' border='0' cellpadding='3' cellspacing='0' bgcolor='#FFFFFF'> <tr> <td align='left'><table border='0' cellspacing='0' cellpadding='0'> <tr> <td rowspan='2' align='left' valign='middle'><a href='http://www.mdgmonitor.org/'><img src='files/mdg_logo.png' alt='mdp logo' border='0' /></a></td> <td align='left' valign='bottom'><font color='#00486D' size='6'><b>MDG</b>MONITOR</td> </tr> <tr> <td align='right' valign='top'><font color='#00486D' size='4'>Track. Learn. Support.</font></td> </tr> </table></td> </tr> <tr> <td align='left' valign='top' bgcolor='#003F7C'><font color='#FFFFFF' size='5'><strong>Chad</strong></font></td> </tr> <tr> <td align='left' valign='top'><table border='0' cellspacing='0' cellpadding='0'> <tr> <td align='left' valign='top'><a href='http://www.mdgmonitor.org/factsheets_00.cfm?c=TCD'><img src='files/chad.jpg' alt='image' width='200' border='0' align='left' /></a></td> <td align='left' valign='middle'><p><strong><font size='3'>Total Population (millions):</font> </strong>9.75</p><p><strong><font size'3'><a href='http://unstats.un.org/unsd/cdb/cdb_dict_xrxx.asp?def_code=63'>GDP</a> per capita (PPP US$):</font></strong> 1807 </p><p><font size='3'><strong>2006 <a href='http://hdr.undp.org/hdr2006/statistics/indices/default.cfm' target='_blank'>Human Development Index</a> (Rank 1-177):</strong> </font>171 </p></td> </tr> </table></td> </tr> <tr> <td align='left' valign='top'><font color='#003F7C' size='5'><strong>Peace and safety first</strong></font></td> </tr> <tr> <td align='left' valign='top'><p><font color='#000000'>Under current conditions, it is unlikely that more than half the MDG targets in Chad can be reached, except the reduction of hunger, and access to primary education and drinking water. The first challenge for the Chad government involves the re-establishment of peace and safety on the eastern border. The three-year-old crisis has absorbed resources intended for development. The second challenge for Chad is to use its oil revenues to diversify the economy and develop human capital to prepare for the post-oil boom projected for 2010.</font></p></td> </tr> <tr> <td align='left' valign='top'><a href='http://www.mdgmonitor.org/factsheets_00.cfm?c=TCD'>Read more... </a></td> </tr> <tr> <td align='right' valign='top'><p>Read related articles on <a href='http://news.google.com/archivesearch?hl=en&ned=us&q=chad+and+%22millennium+development+goals%22&ie=UTF-8'>Google News</a></p></td> </tr> <tr> <td align='right' valign='top'>&nbsp;</td> </tr> <tr> <td align='center'><table border='0' cellpadding='0' cellspacing='0'> <tr> <td align='right' valign='middle'><a href='http://www.un.org/'><img src='files/un_logo_small.png' alt='UN logo' border='0' /></a></td> <td align='left' valign='middle'><font color='#666666'>The  <a href="http://www.un.org/millenniumgoals/" target="_blank">Millennium Development Goals </a>(MDGs) were laid out by the leaders of the world in 2000. They include  halving extreme poverty, halting the spread of HIV/AIDS and   providing universal primary education, all by 2015.</font></td> </tr> </table></td> </tr> </table>]]></description>
			<styleUrl>#text_photo_banner</styleUrl>
			<Point>
				<coordinates>15.044506,12.104797,0</coordinates>
			</Point>
		</Placemark>
		<Placemark>
			<name>Chile</name>
			<visibility>0</visibility>
			<address>http://www.mdgmonitor.org/factsheets_00.cfm?c=CHL</address>
			<Snippet maxLines="2"></Snippet>
			<description><![CDATA[<table width='350' border='0' cellpadding='3' cellspacing='0' bgcolor='#FFFFFF'> <tr> <td align='left'><table border='0' cellspacing='0' cellpadding='0'> <tr> <td rowspan='2' align='left' valign='middle'><a href='http://www.mdgmonitor.org/'><img src='files/mdg_logo.png' alt='mdp logo' border='0' /></a></td> <td align='left' valign='bottom'><font color='#00486D' size='6'><b>MDG</b>MONITOR</td> </tr> <tr> <td align='right' valign='top'><font color='#00486D' size='4'>Track. Learn. Support.</font></td> </tr> </table></td> </tr> <tr> <td align='left' valign='top' bgcolor='#003F7C'><font color='#FFFFFF' size='5'><strong>Chile</strong></font></td> </tr> <tr> <td align='left' valign='top'><table border='0' cellspacing='0' cellpadding='0'> <tr> <td align='left' valign='top'><a href='http://www.mdgmonitor.org/factsheets_00.cfm?c=CHL'><img src='files/chile.jpg' alt='image' width='200' border='0' align='left' /></a></td> <td align='left' valign='middle'><p><strong><font size='3'>Total Population (millions):</font> </strong>16.3</p><p><strong><font size'3'><a href='http://unstats.un.org/unsd/cdb/cdb_dict_xrxx.asp?def_code=63'>GDP</a> per capita (PPP US$):</font></strong> 12635 </p><p><font size='3'><strong>2006 <a href='http://hdr.undp.org/hdr2006/statistics/indices/default.cfm' target='_blank'>Human Development Index</a> (Rank 1-177):</strong> </font>38 </p></td> </tr> </table></td> </tr> <tr> <td align='left' valign='top'><font color='#003F7C' size='5'><strong>Social spending on the increase</strong></font></td> </tr> <tr> <td align='left' valign='top'><p><font color='#000000'>Chile has become the first country in Latin America to achieve a 50 per cent reduction in extreme poverty.  Its gains are the result of reforms that led to increased social spending, with much of it aimed at the poorest of the poor. Despite these achievements, Chile is still behind in some important areas such as inequality in the distribution of income and wealth and the complete eradication of extreme poverty; gender equity, and full recognition of the value and needs of indigenous peoples.</font></p></td> </tr> <tr> <td align='left' valign='top'><a href='http://www.mdgmonitor.org/factsheets_00.cfm?c=CHL'>Read more... </a></td> </tr> <tr> <td align='right' valign='top'><p>Read related articles on <a href='http://news.google.com/archivesearch?hl=en&ned=us&q=chile+and+%22millennium+development+goals%22&ie=UTF-8'>Google News</a></p></td> </tr> <tr> <td align='right' valign='top'>&nbsp;</td> </tr> <tr> <td align='center'><table border='0' cellpadding='0' cellspacing='0'> <tr> <td align='right' valign='middle'><a href='http://www.un.org/'><img src='files/un_logo_small.png' alt='UN logo' border='0' /></a></td> <td align='left' valign='middle'><font color='#666666'>The  <a href="http://www.un.org/millenniumgoals/" target="_blank">Millennium Development Goals </a>(MDGs) were laid out by the leaders of the world in 2000. They include  halving extreme poverty, halting the spread of HIV/AIDS and   providing universal primary education, all by 2015.</font></td> </tr> </table></td> </tr> </table>]]></description>
			<styleUrl>#text_photo_banner</styleUrl>
			<Point>
				<coordinates>-70.641991,-33.469117,0</coordinates>
			</Point>
		</Placemark>
		<Placemark>
			<name>China</name>
			<visibility>0</visibility>
			<address>http://www.mdgmonitor.org/factsheets_00.cfm?c=CHN</address>
			<Snippet maxLines="2"></Snippet>
			<description><![CDATA[<table width='350' border='0' cellpadding='3' cellspacing='0' bgcolor='#FFFFFF'> <tr> <td align='left'><table border='0' cellspacing='0' cellpadding='0'> <tr> <td rowspan='2' align='left' valign='middle'><a href='http://www.mdgmonitor.org/'><img src='files/mdg_logo.png' alt='mdp logo' border='0' /></a></td> <td align='left' valign='bottom'><font color='#00486D' size='6'><b>MDG</b>MONITOR</td> </tr> <tr> <td align='right' valign='top'><font color='#00486D' size='4'>Track. Learn. Support.</font></td> </tr> </table></td> </tr> <tr> <td align='left' valign='top' bgcolor='#003F7C'><font color='#FFFFFF' size='5'><strong>China</strong></font></td> </tr> <tr> <td align='left' valign='top'><table border='0' cellspacing='0' cellpadding='0'> <tr> <td align='left' valign='top'><a href='http://www.mdgmonitor.org/factsheets_00.cfm?c=CHN'><img src='files/china.jpg' alt='image' width='200' border='0' align='left' /></a></td> <td align='left' valign='middle'><p><strong><font size='3'>Total Population (millions):</font> </strong>1315.84</p><p><strong><font size'3'><a href='http://unstats.un.org/unsd/cdb/cdb_dict_xrxx.asp?def_code=63'>GDP</a> per capita (PPP US$):</font></strong> 6572 </p><p><font size='3'><strong>2006 <a href='http://hdr.undp.org/hdr2006/statistics/indices/default.cfm' target='_blank'>Human Development Index</a> (Rank 1-177):</strong> </font>81 </p></td> </tr> </table></td> </tr> <tr> <td align='left' valign='top'><font color='#003F7C' size='5'><strong>Unprecedented success</strong></font></td> </tr> <tr> <td align='left' valign='top'><p><font color='#000000'>China’s success in reducing income poverty is unprecedented. Its progress towards MDG No. 2 (universal primary education), MDG No. 4 (reducing child mortality) and MDG No. 5 (improving maternal health) has also been strong. The greatest challenges are in MDG No. 3 (gender equality and empowerment of women) and MDG No. 7 (ensuring environmental sustainability). School enrolment gender ratios are generally on track. But there are continued indications of gender inequality, as evidenced in the high boy:girl birth ratio and in the fairly low representation of women in senior government posts.</font></p></td> </tr> <tr> <td align='left' valign='top'><a href='http://www.mdgmonitor.org/factsheets_00.cfm?c=CHN'>Read more... </a></td> </tr> <tr> <td align='right' valign='top'><p>Read related articles on <a href='http://news.google.com/archivesearch?hl=en&ned=us&ie=UTF-8&q=china+and+%22millennium+development+goals%22'>Google News</a></p></td> </tr> <tr> <td align='right' valign='top'>&nbsp;</td> </tr> <tr> <td align='center'><table border='0' cellpadding='0' cellspacing='0'> <tr> <td align='right' valign='middle'><a href='http://www.un.org/'><img src='files/un_logo_small.png' alt='UN logo' border='0' /></a></td> <td align='left' valign='middle'><font color='#666666'>The  <a href="http://www.un.org/millenniumgoals/" target="_blank">Millennium Development Goals </a>(MDGs) were laid out by the leaders of the world in 2000. They include  halving extreme poverty, halting the spread of HIV/AIDS and   providing universal primary education, all by 2015.</font></td> </tr> </table></td> </tr> </table>]]></description>
			<styleUrl>#text_photo_banner</styleUrl>
			<Point>
				<coordinates>116.391576,39.903241,0</coordinates>
			</Point>
		</Placemark>
		<Placemark>
			<name>Colombia</name>
			<visibility>0</visibility>
			<address>http://www.mdgmonitor.org/factsheets_00.cfm?c=COL</address>
			<Snippet maxLines="2"></Snippet>
			<description><![CDATA[<table width='350' border='0' cellpadding='3' cellspacing='0' bgcolor='#FFFFFF'> <tr> <td align='left'><table border='0' cellspacing='0' cellpadding='0'> <tr> <td rowspan='2' align='left' valign='middle'><a href='http://www.mdgmonitor.org/'><img src='files/mdg_logo.png' alt='mdp logo' border='0' /></a></td> <td align='left' valign='bottom'><font color='#00486D' size='6'><b>MDG</b>MONITOR</td> </tr> <tr> <td align='right' valign='top'><font color='#00486D' size='4'>Track. Learn. Support.</font></td> </tr> </table></td> </tr> <tr> <td align='left' valign='top' bgcolor='#003F7C'><font color='#FFFFFF' size='5'><strong>Colombia</strong></font></td> </tr> <tr> <td align='left' valign='top'><table border='0' cellspacing='0' cellpadding='0'> <tr> <td align='left' valign='top'><a href='http://www.mdgmonitor.org/factsheets_00.cfm?c=COL'><img src='files/colombia.jpg' alt='image' width='200' border='0' align='left' /></a></td> <td align='left' valign='middle'><p><strong><font size='3'>Total Population (millions):</font> </strong>45.6</p><p><strong><font size'3'><a href='http://unstats.un.org/unsd/cdb/cdb_dict_xrxx.asp?def_code=63'>GDP</a> per capita (PPP US$):</font></strong> 7769 </p><p><font size='3'><strong>2006 <a href='http://hdr.undp.org/hdr2006/statistics/indices/default.cfm' target='_blank'>Human Development Index</a> (Rank 1-177):</strong> </font>70 </p></td> </tr> </table></td> </tr> <tr> <td align='left' valign='top'><font color='#003F7C' size='5'><strong>Putting an end to armed conflict</strong></font></td> </tr> <tr> <td align='left' valign='top'><p><font color='#000000'>The Government of Colombia declared that the goal for reducing extreme poverty will be reached five years before the target date of 2015.  However, one challenge is to put an end to armed conflict.  More than 2 million people have been internally displaced by conflict, while others have disappeared or have been kidnapped. These victims form a large proportion of the population that would benefit the most from achievement of the MDGs. Because armed conflict undermines governance in these territories, the capacity of many local regional institutions has been diminished.</font></p></td> </tr> <tr> <td align='left' valign='top'><a href='http://www.mdgmonitor.org/factsheets_00.cfm?c=COL'>Read more... </a></td> </tr> <tr> <td align='right' valign='top'><p>Read related articles on <a href='http://news.google.com/archivesearch?hl=en&ned=us&ie=UTF-8&q=colombia+and+%22millennium+development+goals%22'>Google News</a></p></td> </tr> <tr> <td align='right' valign='top'>&nbsp;</td> </tr> <tr> <td align='center'><table border='0' cellpadding='0' cellspacing='0'> <tr> <td align='right' valign='middle'><a href='http://www.un.org/'><img src='files/un_logo_small.png' alt='UN logo' border='0' /></a></td> <td align='left' valign='middle'><font color='#666666'>The  <a href="http://www.un.org/millenniumgoals/" target="_blank">Millennium Development Goals </a>(MDGs) were laid out by the leaders of the world in 2000. They include  halving extreme poverty, halting the spread of HIV/AIDS and   providing universal primary education, all by 2015.</font></td> </tr> </table></td> </tr> </table>]]></description>
			<styleUrl>#text_photo_banner</styleUrl>
			<Point>
				<coordinates>-74.089996,4.63,0</coordinates>
			</Point>
		</Placemark>
		<Placemark>
			<name>Comoros</name>
			<visibility>0</visibility>
			<address>http://www.mdgmonitor.org/factsheets_00.cfm?c=COM</address>
			<Snippet maxLines="2"></Snippet>
			<description><![CDATA[<table width='350' border='0' cellpadding='3' cellspacing='0' bgcolor='#FFFFFF'> <tr> <td align='left'><table border='0' cellspacing='0' cellpadding='0'> <tr> <td rowspan='2' align='left' valign='middle'><a href='http://www.mdgmonitor.org/'><img src='files/mdg_logo.png' alt='mdp logo' border='0' /></a></td> <td align='left' valign='bottom'><font color='#00486D' size='6'><b>MDG</b>MONITOR</td> </tr> <tr> <td align='right' valign='top'><font color='#00486D' size='4'>Track. Learn. Support.</font></td> </tr> </table></td> </tr> <tr> <td align='left' valign='top' bgcolor='#003F7C'><font color='#FFFFFF' size='5'><strong>Comoros</strong></font></td> </tr> <tr> <td align='left' valign='top'><table border='0' cellspacing='0' cellpadding='0'> <tr> <td align='left' valign='top'><a href='http://www.mdgmonitor.org/factsheets_00.cfm?c=COM'><img src='files/comoros.jpg' alt='image' width='200' border='0' align='left' /></a></td> <td align='left' valign='middle'><p><strong><font size='3'>Total Population (millions):</font> </strong>0.8</p><p><strong><font size'3'><a href='http://unstats.un.org/unsd/cdb/cdb_dict_xrxx.asp?def_code=63'>GDP</a> per capita (PPP US$):</font></strong> 2007 </p><p><font size='3'><strong>2006 <a href='http://hdr.undp.org/hdr2006/statistics/indices/default.cfm' target='_blank'>Human Development Index</a> (Rank 1-177):</strong> </font>132 </p></td> </tr> </table></td> </tr> <tr> <td align='left' valign='top'><font color='#003F7C' size='5'><strong>Education and health as the best results</strong></font></td> </tr> <tr> <td align='left' valign='top'><p><font color='#000000'>The Comoros shows its best results in education and health and, to a lesser degree, in the level of income poverty. These results have been achieved largely because of investments in the health and education sectors through programmes supported by the international community. The promotion of microfinance and programmes for microenterprise has helped in poverty reduction.  The main challenges are to broaden the production base of the Comoros; build national capacity; reduce gender inequalities; and halt the degradation of the environmental heritage.</font></p></td> </tr> <tr> <td align='left' valign='top'><a href='http://www.mdgmonitor.org/factsheets_00.cfm?c=COM'>Read more... </a></td> </tr> <tr> <td align='right' valign='top'><p>Read related articles on <a href='http://news.google.com/archivesearch?hl=en&ned=us&ie=UTF-8&q=comoros+and+%22millennium+development+goals%22'>Google News</a></p></td> </tr> <tr> <td align='right' valign='top'>&nbsp;</td> </tr> <tr> <td align='center'><table border='0' cellpadding='0' cellspacing='0'> <tr> <td align='right' valign='middle'><a href='http://www.un.org/'><img src='files/un_logo_small.png' alt='UN logo' border='0' /></a></td> <td align='left' valign='middle'><font color='#666666'>The  <a href="http://www.un.org/millenniumgoals/" target="_blank">Millennium Development Goals </a>(MDGs) were laid out by the leaders of the world in 2000. They include  halving extreme poverty, halting the spread of HIV/AIDS and   providing universal primary education, all by 2015.</font></td> </tr> </table></td> </tr> </table>]]></description>
			<styleUrl>#text_photo_banner</styleUrl>
			<Point>
				<coordinates>43.24865201,-11.70566412,0</coordinates>
			</Point>
		</Placemark>
		<Placemark>
			<name>Congo (Brazzaville), Republic of</name>
			<visibility>0</visibility>
			<address>http://www.mdgmonitor.org/factsheets_00.cfm?c=COG</address>
			<Snippet maxLines="2"></Snippet>
			<description><![CDATA[<table width='350' border='0' cellpadding='3' cellspacing='0' bgcolor='#FFFFFF'> <tr> <td align='left'><table border='0' cellspacing='0' cellpadding='0'> <tr> <td rowspan='2' align='left' valign='middle'><a href='http://www.mdgmonitor.org/'><img src='files/mdg_logo.png' alt='mdp logo' border='0' /></a></td> <td align='left' valign='bottom'><font color='#00486D' size='6'><b>MDG</b>MONITOR</td> </tr> <tr> <td align='right' valign='top'><font color='#00486D' size='4'>Track. Learn. Support.</font></td> </tr> </table></td> </tr> <tr> <td align='left' valign='top' bgcolor='#003F7C'><font color='#FFFFFF' size='5'><strong>Congo (Brazzaville), Republic of</strong></font></td> </tr> <tr> <td align='left' valign='top'><table border='0' cellspacing='0' cellpadding='0'> <tr> <td align='left' valign='top'><a href='http://www.mdgmonitor.org/factsheets_00.cfm?c=COG'><img src='files/congo.jpg' alt='image' width='200' border='0' align='left' /></a></td> <td align='left' valign='middle'><p><strong><font size='3'>Total Population (millions):</font> </strong>4</p><p><strong><font size'3'><a href='http://unstats.un.org/unsd/cdb/cdb_dict_xrxx.asp?def_code=63'>GDP</a> per capita (PPP US$):</font></strong> 1041 </p><p><font size='3'><strong>2006 <a href='http://hdr.undp.org/hdr2006/statistics/indices/default.cfm' target='_blank'>Human Development Index</a> (Rank 1-177):</strong> </font>140 </p></td> </tr> </table></td> </tr> <tr> <td align='left' valign='top'><font color='#003F7C' size='5'><strong>After the war</strong></font></td> </tr> <tr> <td align='left' valign='top'><p><font color='#000000'>The Congo has emerged from conflicts that have taken a toll in human lives and basic socio-economic infrastructure. Efforts to strengthen the country, achieve governmental capacity-building, and restore the infrastructure have driven the Government’s programmes and projects, supported by its development partners. An example of good practice is the coordinated support that the United Nations organizations in the Congo are providing for a pilot experiment in public health for Gaboma District.</font></p></td> </tr> <tr> <td align='left' valign='top'><a href='http://www.mdgmonitor.org/factsheets_00.cfm?c=COG'>Read more... </a></td> </tr> <tr> <td align='right' valign='top'><p>Read related articles on <a href='http://news.google.com/news?hl=en&ned=us&ie=UTF-8&q=%22republic+of+congo%22+and+%22millennium+development+goals%22'>Google News</a></p></td> </tr> <tr> <td align='right' valign='top'>&nbsp;</td> </tr> <tr> <td align='center'><table border='0' cellpadding='0' cellspacing='0'> <tr> <td align='right' valign='middle'><a href='http://www.un.org/'><img src='files/un_logo_small.png' alt='UN logo' border='0' /></a></td> <td align='left' valign='middle'><font color='#666666'>The  <a href="http://www.un.org/millenniumgoals/" target="_blank">Millennium Development Goals </a>(MDGs) were laid out by the leaders of the world in 2000. They include  halving extreme poverty, halting the spread of HIV/AIDS and   providing universal primary education, all by 2015.</font></td> </tr> </table></td> </tr> </table>]]></description>
			<styleUrl>#text_photo_banner</styleUrl>
			<Point>
				<coordinates>15.26,-4.25,0</coordinates>
			</Point>
		</Placemark>
		<Placemark>
			<name>Cook Islands (Samoa)</name>
			<visibility>0</visibility>
			<address>http://www.mdgmonitor.org/factsheets_00.cfm?c=CKI</address>
			<Snippet maxLines="2"></Snippet>
			<description><![CDATA[<table width='350' border='0' cellpadding='3' cellspacing='0' bgcolor='#FFFFFF'> <tr> <td align='left'><table border='0' cellspacing='0' cellpadding='0'> <tr> <td rowspan='2' align='left' valign='middle'><a href='http://www.mdgmonitor.org/'><img src='files/mdg_logo.png' alt='mdp logo' border='0' /></a></td> <td align='left' valign='bottom'><font color='#00486D' size='6'><b>MDG</b>MONITOR</td> </tr> <tr> <td align='right' valign='top'><font color='#00486D' size='4'>Track. Learn. Support.</font></td> </tr> </table></td> </tr> <tr> <td align='left' valign='top' bgcolor='#003F7C'><font color='#FFFFFF' size='5'><strong>Cook Islands (Samoa)</strong></font></td> </tr> <tr> <td align='left' valign='top'><table border='0' cellspacing='0' cellpadding='0'> <tr> <td align='left' valign='top'><a href='http://www.mdgmonitor.org/factsheets_00.cfm?c=CKI'><img src='files/cook.jpg' alt='image' width='200' border='0' align='left' /></a></td> <td align='left' valign='middle'><p><strong><font size='3'>Total Population (millions):</font> </strong>0.02</p><p><strong><font size'3'><a href='http://unstats.un.org/unsd/cdb/cdb_dict_xrxx.asp?def_code=63'>GDP</a> per capita (PPP US$):</font></strong> NA </p><p><font size='3'><strong>2006 <a href='http://hdr.undp.org/hdr2006/statistics/indices/default.cfm' target='_blank'>Human Development Index</a> (Rank 1-177):</strong> </font>NA </p></td> </tr> </table></td> </tr> <tr> <td align='left' valign='top'><font color='#003F7C' size='5'><strong>Regional disparities</strong></font></td> </tr> <tr> <td align='left' valign='top'><p><font color='#000000'>As far as the MDGs are concerned, the Cook Islands are one of the better-performing small island developing States in terms of MDG achievement. By 2005, the islands had already achieved two of the Goals: No. 4 (reducing child mortality) and No. 5 (improving maternal health). The most pressing challenge is the disparity of development opportunities between the main island of Rarotonga and the outer islands. Communities in the outer islands and pockets of communities on Rarotonga experience hardship because they lack of job opportunities and access to basic social services.</font></p></td> </tr> <tr> <td align='left' valign='top'><a href='http://www.mdgmonitor.org/factsheets_00.cfm?c=CKI'>Read more... </a></td> </tr> <tr> <td align='right' valign='top'><p>Read related articles on <a href='http://news.google.com/archivesearch?hl=en&ned=us&ie=UTF-8&q=%22Cook+islands%22+and+%22millennium+development+goals%22'>Google News</a></p></td> </tr> <tr> <td align='right' valign='top'>&nbsp;</td> </tr> <tr> <td align='center'><table border='0' cellpadding='0' cellspacing='0'> <tr> <td align='right' valign='middle'><a href='http://www.un.org/'><img src='files/un_logo_small.png' alt='UN logo' border='0' /></a></td> <td align='left' valign='middle'><font color='#666666'>The  <a href="http://www.un.org/millenniumgoals/" target="_blank">Millennium Development Goals </a>(MDGs) were laid out by the leaders of the world in 2000. They include  halving extreme poverty, halting the spread of HIV/AIDS and   providing universal primary education, all by 2015.</font></td> </tr> </table></td> </tr> </table>]]></description>
			<styleUrl>#text_photo_banner</styleUrl>
			<Point>
				<coordinates>-159.775505,-21.206642,0</coordinates>
			</Point>
		</Placemark>
		<Placemark>
			<name>Costa Rica</name>
			<visibility>0</visibility>
			<address>http://www.mdgmonitor.org/factsheets_00.cfm?c=CRI</address>
			<Snippet maxLines="2"></Snippet>
			<description><![CDATA[<table width='350' border='0' cellpadding='3' cellspacing='0' bgcolor='#FFFFFF'> <tr> <td align='left'><table border='0' cellspacing='0' cellpadding='0'> <tr> <td rowspan='2' align='left' valign='middle'><a href='http://www.mdgmonitor.org/'><img src='files/mdg_logo.png' alt='mdp logo' border='0' /></a></td> <td align='left' valign='bottom'><font color='#00486D' size='6'><b>MDG</b>MONITOR</td> </tr> <tr> <td align='right' valign='top'><font color='#00486D' size='4'>Track. Learn. Support.</font></td> </tr> </table></td> </tr> <tr> <td align='left' valign='top' bgcolor='#003F7C'><font color='#FFFFFF' size='5'><strong>Costa Rica</strong></font></td> </tr> <tr> <td align='left' valign='top'><table border='0' cellspacing='0' cellpadding='0'> <tr> <td align='left' valign='top'><a href='http://www.mdgmonitor.org/factsheets_00.cfm?c=CRI'><img src='files/costarica.jpg' alt='image' width='200' border='0' align='left' /></a></td> <td align='left' valign='middle'><p><strong><font size='3'>Total Population (millions):</font> </strong>4.33</p><p><strong><font size'3'><a href='http://unstats.un.org/unsd/cdb/cdb_dict_xrxx.asp?def_code=63'>GDP</a> per capita (PPP US$):</font></strong> 9985 </p><p><font size='3'><strong>2006 <a href='http://hdr.undp.org/hdr2006/statistics/indices/default.cfm' target='_blank'>Human Development Index</a> (Rank 1-177):</strong> </font>48 </p></td> </tr> </table></td> </tr> <tr> <td align='left' valign='top'><font color='#003F7C' size='5'><strong>Gender equality and indigenous rights</strong></font></td> </tr> <tr> <td align='left' valign='top'><p><font color='#000000'>While Costa Rica has high rankings in some MDG indicators, it has some distance to go before it can achieve a substantial number of MDGs, especially in such areas as gender equality and the rights of indigenous peoples. The country’s main challenge will be sustaining its progress. This makes it all the more imperative that the State, civil society and the United Nations monitor such areas as education, health and protection of the environment that directly affect the achievement of the MDGs.</font></p></td> </tr> <tr> <td align='left' valign='top'><a href='http://www.mdgmonitor.org/factsheets_00.cfm?c=CRI'>Read more... </a></td> </tr> <tr> <td align='right' valign='top'><p>Read related articles on <a href='http://news.google.com/archivesearch?hl=en&ned=us&ie=UTF-8&q=%22costa+rica%22+and+%22millennium+development+goals%22'>Google News</a></p></td> </tr> <tr> <td align='right' valign='top'>&nbsp;</td> </tr> <tr> <td align='center'><table border='0' cellpadding='0' cellspacing='0'> <tr> <td align='right' valign='middle'><a href='http://www.un.org/'><img src='files/un_logo_small.png' alt='UN logo' border='0' /></a></td> <td align='left' valign='middle'><font color='#666666'>The  <a href="http://www.un.org/millenniumgoals/" target="_blank">Millennium Development Goals </a>(MDGs) were laid out by the leaders of the world in 2000. They include  halving extreme poverty, halting the spread of HIV/AIDS and   providing universal primary education, all by 2015.</font></td> </tr> </table></td> </tr> </table>]]></description>
			<styleUrl>#text_photo_banner</styleUrl>
			<Point>
				<coordinates>-84.082042,9.927113,0</coordinates>
			</Point>
		</Placemark>
		<Placemark>
			<name>Côte d&apos;Ivoire</name>
			<visibility>0</visibility>
			<address>http://www.mdgmonitor.org/factsheets_00.cfm?c=CIV</address>
			<Snippet maxLines="2"></Snippet>
			<description><![CDATA[<table width='350' border='0' cellpadding='3' cellspacing='0' bgcolor='#FFFFFF'> <tr> <td align='left'><table border='0' cellspacing='0' cellpadding='0'> <tr> <td rowspan='2' align='left' valign='middle'><a href='http://www.mdgmonitor.org/'><img src='files/mdg_logo.png' alt='mdp logo' border='0' /></a></td> <td align='left' valign='bottom'><font color='#00486D' size='6'><b>MDG</b>MONITOR</td> </tr> <tr> <td align='right' valign='top'><font color='#00486D' size='4'>Track. Learn. Support.</font></td> </tr> </table></td> </tr> <tr> <td align='left' valign='top' bgcolor='#003F7C'><font color='#FFFFFF' size='5'><strong>Côte d'Ivoire</strong></font></td> </tr> <tr> <td align='left' valign='top'><table border='0' cellspacing='0' cellpadding='0'> <tr> <td align='left' valign='top'><a href='http://www.mdgmonitor.org/factsheets_00.cfm?c=CIV'><img src='files/cotedivoire.jpg' alt='image' width='200' border='0' align='left' /></a></td> <td align='left' valign='middle'><p><strong><font size='3'>Total Population (millions):</font> </strong>18.15</p><p><strong><font size'3'><a href='http://unstats.un.org/unsd/cdb/cdb_dict_xrxx.asp?def_code=63'>GDP</a> per capita (PPP US$):</font></strong> 1566 </p><p><font size='3'><strong>2006 <a href='http://hdr.undp.org/hdr2006/statistics/indices/default.cfm' target='_blank'>Human Development Index</a> (Rank 1-177):</strong> </font>164 </p></td> </tr> </table></td> </tr> <tr> <td align='left' valign='top'><font color='#003F7C' size='5'><strong>A fragile social and economic climate</strong></font></td> </tr> <tr> <td align='left' valign='top'><p><font color='#000000'>One of the principal obstacles to the efficient implementation of the MDGs in Côte d’Ivoire is the socio-political climate, which continues to be fragile since the attempted coup d’état in September 2002. This has prevented the undertaking of effective development actions in certain parts of the country. A pilot experiment for MDG-based regional development is currently being carried out in the community of Tiassalé. The results should demonstrate the potential to achieve the MDGs through local development strategies and show how this process can serve as a benchmark for replicating similar initiatives in other parts of the country.</font></p></td> </tr> <tr> <td align='left' valign='top'><a href='http://www.mdgmonitor.org/factsheets_00.cfm?c=CIV'>Read more... </a></td> </tr> <tr> <td align='right' valign='top'><p>Read related articles on <a href='http://news.google.com/news?hl=en&ned=us&ie=UTF-8&q=%22cote+d%27ivoire%22+and+%22millennium+development+goals%22'>Google News</a></p></td> </tr> <tr> <td align='right' valign='top'>&nbsp;</td> </tr> <tr> <td align='center'><table border='0' cellpadding='0' cellspacing='0'> <tr> <td align='right' valign='middle'><a href='http://www.un.org/'><img src='files/un_logo_small.png' alt='UN logo' border='0' /></a></td> <td align='left' valign='middle'><font color='#666666'>The  <a href="http://www.un.org/millenniumgoals/" target="_blank">Millennium Development Goals </a>(MDGs) were laid out by the leaders of the world in 2000. They include  halving extreme poverty, halting the spread of HIV/AIDS and   providing universal primary education, all by 2015.</font></td> </tr> </table></td> </tr> </table>]]></description>
			<styleUrl>#text_photo_banner</styleUrl>
			<Point>
				<coordinates>-5.293943,6.815154408,0</coordinates>
			</Point>
		</Placemark>
		<Placemark>
			<name>Croatia</name>
			<visibility>0</visibility>
			<address>http://www.mdgmonitor.org/factsheets_00.cfm?c=HRV</address>
			<Snippet maxLines="2"></Snippet>
			<description><![CDATA[<table width='350' border='0' cellpadding='3' cellspacing='0' bgcolor='#FFFFFF'> <tr> <td align='left'><table border='0' cellspacing='0' cellpadding='0'> <tr> <td rowspan='2' align='left' valign='middle'><a href='http://www.mdgmonitor.org/'><img src='files/mdg_logo.png' alt='mdp logo' border='0' /></a></td> <td align='left' valign='bottom'><font color='#00486D' size='6'><b>MDG</b>MONITOR</td> </tr> <tr> <td align='right' valign='top'><font color='#00486D' size='4'>Track. Learn. Support.</font></td> </tr> </table></td> </tr> <tr> <td align='left' valign='top' bgcolor='#003F7C'><font color='#FFFFFF' size='5'><strong>Croatia</strong></font></td> </tr> <tr> <td align='left' valign='top'><table border='0' cellspacing='0' cellpadding='0'> <tr> <td align='left' valign='top'><a href='http://www.mdgmonitor.org/factsheets_00.cfm?c=HRV'><img src='files/croatia.jpg' alt='image' width='200' border='0' align='left' /></a></td> <td align='left' valign='middle'><p><strong><font size='3'>Total Population (millions):</font> </strong>4.55</p><p><strong><font size'3'><a href='http://unstats.un.org/unsd/cdb/cdb_dict_xrxx.asp?def_code=63'>GDP</a> per capita (PPP US$):</font></strong> 13169 </p><p><font size='3'><strong>2006 <a href='http://hdr.undp.org/hdr2006/statistics/indices/default.cfm' target='_blank'>Human Development Index</a> (Rank 1-177):</strong> </font>44 </p></td> </tr> </table></td> </tr> <tr> <td align='left' valign='top'><font color='#003F7C' size='5'><strong>Focusing on the disadvantaged</strong></font></td> </tr> <tr> <td align='left' valign='top'><p><font color='#000000'>The Croatian government is paying particular attention to impoverished groups, including people with disabilities; people over 65 years old (especially women); the long-term unemployed; members of the Roma ethnic group, and families with three or more children.</font></p></td> </tr> <tr> <td align='left' valign='top'><a href='http://www.mdgmonitor.org/factsheets_00.cfm?c=HRV'>Read more... </a></td> </tr> <tr> <td align='right' valign='top'><p>Read related articles on <a href='http://news.google.com/archivesearch?hl=en&ned=us&ie=UTF-8&q=croatia++and+%22millennium+development+goals%22'>Google News</a></p></td> </tr> <tr> <td align='right' valign='top'>&nbsp;</td> </tr> <tr> <td align='center'><table border='0' cellpadding='0' cellspacing='0'> <tr> <td align='right' valign='middle'><a href='http://www.un.org/'><img src='files/un_logo_small.png' alt='UN logo' border='0' /></a></td> <td align='left' valign='middle'><font color='#666666'>The  <a href="http://www.un.org/millenniumgoals/" target="_blank">Millennium Development Goals </a>(MDGs) were laid out by the leaders of the world in 2000. They include  halving extreme poverty, halting the spread of HIV/AIDS and   providing universal primary education, all by 2015.</font></td> </tr> </table></td> </tr> </table>]]></description>
			<styleUrl>#text_photo_banner</styleUrl>
			<Point>
				<coordinates>15.97,45.799999,0</coordinates>
			</Point>
		</Placemark>
		<Placemark>
			<name>Cuba</name>
			<visibility>0</visibility>
			<address>http://www.mdgmonitor.org/factsheets_00.cfm?c=CUB</address>
			<Snippet maxLines="2"></Snippet>
			<description><![CDATA[<table width='350' border='0' cellpadding='3' cellspacing='0' bgcolor='#FFFFFF'> <tr> <td align='left'><table border='0' cellspacing='0' cellpadding='0'> <tr> <td rowspan='2' align='left' valign='middle'><a href='http://www.mdgmonitor.org/'><img src='files/mdg_logo.png' alt='mdp logo' border='0' /></a></td> <td align='left' valign='bottom'><font color='#00486D' size='6'><b>MDG</b>MONITOR</td> </tr> <tr> <td align='right' valign='top'><font color='#00486D' size='4'>Track. Learn. Support.</font></td> </tr> </table></td> </tr> <tr> <td align='left' valign='top' bgcolor='#003F7C'><font color='#FFFFFF' size='5'><strong>Cuba</strong></font></td> </tr> <tr> <td align='left' valign='top'><table border='0' cellspacing='0' cellpadding='0'> <tr> <td align='left' valign='top'><a href='http://www.mdgmonitor.org/factsheets_00.cfm?c=CUB'><img src='files/cuba.jpg' alt='image' width='200' border='0' align='left' /></a></td> <td align='left' valign='middle'><p><strong><font size='3'>Total Population (millions):</font> </strong>11.27</p><p><strong><font size'3'><a href='http://unstats.un.org/unsd/cdb/cdb_dict_xrxx.asp?def_code=63'>GDP</a> per capita (PPP US$):</font></strong> NA </p><p><font size='3'><strong>2006 <a href='http://hdr.undp.org/hdr2006/statistics/indices/default.cfm' target='_blank'>Human Development Index</a> (Rank 1-177):</strong> </font>50 </p></td> </tr> </table></td> </tr> <tr> <td align='left' valign='top'><font color='#003F7C' size='5'><strong>Equity and social investment</strong></font></td> </tr> <tr> <td align='left' valign='top'><p><font color='#000000'>Since the Cuban revolution, an emphasis has been placed on equity and social investment. There is no distinct strategy to achieve the MDGs as these objectives have long formed part of the Cuban vision of development. As a consequence, Cuba shows relatively high social indicators. The Goals of universal primary education; gender equality and empowerment of women; and reduction of child mortality have already been achieved. Others are on track or require further efforts. However, even though significant progress has been made in human development, there are differences at the regional and provincial levels.</font></p></td> </tr> <tr> <td align='left' valign='top'><a href='http://www.mdgmonitor.org/factsheets_00.cfm?c=CUB'>Read more... </a></td> </tr> <tr> <td align='right' valign='top'><p>Read related articles on <a href='http://news.google.com/archivesearch?hl=en&ned=us&ie=UTF-8&q=cuba+and+%22millennium+development+goals%22'>Google News</a></p></td> </tr> <tr> <td align='right' valign='top'>&nbsp;</td> </tr> <tr> <td align='center'><table border='0' cellpadding='0' cellspacing='0'> <tr> <td align='right' valign='middle'><a href='http://www.un.org/'><img src='files/un_logo_small.png' alt='UN logo' border='0' /></a></td> <td align='left' valign='middle'><font color='#666666'>The  <a href="http://www.un.org/millenniumgoals/" target="_blank">Millennium Development Goals </a>(MDGs) were laid out by the leaders of the world in 2000. They include  halving extreme poverty, halting the spread of HIV/AIDS and   providing universal primary education, all by 2015.</font></td> </tr> </table></td> </tr> </table>]]></description>
			<styleUrl>#text_photo_banner</styleUrl>
			<Point>
				<coordinates>-82.389999,23.129999,0</coordinates>
			</Point>
		</Placemark>
		<Placemark>
			<name>Czech Republic</name>
			<visibility>0</visibility>
			<address>http://www.mdgmonitor.org/factsheets_00.cfm?c=CZE</address>
			<Snippet maxLines="2"></Snippet>
			<description><![CDATA[<table width='350' border='0' cellpadding='3' cellspacing='0' bgcolor='#FFFFFF'> <tr> <td align='left'><table border='0' cellspacing='0' cellpadding='0'> <tr> <td rowspan='2' align='left' valign='middle'><a href='http://www.mdgmonitor.org/'><img src='files/mdg_logo.png' alt='mdp logo' border='0' /></a></td> <td align='left' valign='bottom'><font color='#00486D' size='6'><b>MDG</b>MONITOR</td> </tr> <tr> <td align='right' valign='top'><font color='#00486D' size='4'>Track. Learn. Support.</font></td> </tr> </table></td> </tr> <tr> <td align='left' valign='top' bgcolor='#003F7C'><font color='#FFFFFF' size='5'><strong>Czech Republic</strong></font></td> </tr> <tr> <td align='left' valign='top'><table border='0' cellspacing='0' cellpadding='0'> <tr> <td align='left' valign='top'><a href='http://www.mdgmonitor.org/factsheets_00.cfm?c=CZE'><img src='files/czechrepublic.jpg' alt='image' width='200' border='0' align='left' /></a></td> <td align='left' valign='middle'><p><strong><font size='3'>Total Population (millions):</font> </strong>10.22</p><p><strong><font size'3'><a href='http://unstats.un.org/unsd/cdb/cdb_dict_xrxx.asp?def_code=63'>GDP</a> per capita (PPP US$):</font></strong> 21317 </p><p><font size='3'><strong>2006 <a href='http://hdr.undp.org/hdr2006/statistics/indices/default.cfm' target='_blank'>Human Development Index</a> (Rank 1-177):</strong> </font>30 </p></td> </tr> </table></td> </tr> <tr> <td align='left' valign='top'><font color='#003F7C' size='5'><strong>An EU member</strong></font></td> </tr> <tr> <td align='left' valign='top'><p><font color='#000000'>As one of the newer members of the European Union (EU), the Czech Republic is aligning its MDG agenda with that of its EU neighbours, especially in the areas of environmental protection and social exclusion. At the same time, the Czech Government is working to make good on its long-standing commitment to eradicate extreme poverty in developing countries and those in transition to market economies, an effort in line with Goal No. 8.</font></p></td> </tr> <tr> <td align='left' valign='top'><a href='http://www.mdgmonitor.org/factsheets_00.cfm?c=CZE'>Read more... </a></td> </tr> <tr> <td align='right' valign='top'><p>Read related articles on <a href='http://news.google.com/archivesearch?q=%22Czech+republic%22+and+%22millennium+development+goals%22&hl=en&ned=us&ie=UTF-8'>Google News</a></p></td> </tr> <tr> <td align='right' valign='top'>&nbsp;</td> </tr> <tr> <td align='center'><table border='0' cellpadding='0' cellspacing='0'> <tr> <td align='right' valign='middle'><a href='http://www.un.org/'><img src='files/un_logo_small.png' alt='UN logo' border='0' /></a></td> <td align='left' valign='middle'><font color='#666666'>The  <a href="http://www.un.org/millenniumgoals/" target="_blank">Millennium Development Goals </a>(MDGs) were laid out by the leaders of the world in 2000. They include  halving extreme poverty, halting the spread of HIV/AIDS and   providing universal primary education, all by 2015.</font></td> </tr> </table></td> </tr> </table>]]></description>
			<styleUrl>#text_photo_banner</styleUrl>
			<Point>
				<coordinates>14.43,50.08000100000001,0</coordinates>
			</Point>
		</Placemark>
		<Placemark>
			<name>Democratic Republic of the Congo</name>
			<visibility>0</visibility>
			<address>http://www.mdgmonitor.org/factsheets_00.cfm?c=COD</address>
			<Snippet maxLines="2"></Snippet>
			<description><![CDATA[<table width='350' border='0' cellpadding='3' cellspacing='0' bgcolor='#FFFFFF'> <tr> <td align='left'><table border='0' cellspacing='0' cellpadding='0'> <tr> <td rowspan='2' align='left' valign='middle'><a href='http://www.mdgmonitor.org/'><img src='files/mdg_logo.png' alt='mdp logo' border='0' /></a></td> <td align='left' valign='bottom'><font color='#00486D' size='6'><b>MDG</b>MONITOR</td> </tr> <tr> <td align='right' valign='top'><font color='#00486D' size='4'>Track. Learn. Support.</font></td> </tr> </table></td> </tr> <tr> <td align='left' valign='top' bgcolor='#003F7C'><font color='#FFFFFF' size='5'><strong>Democratic Republic of the Congo</strong></font></td> </tr> <tr> <td align='left' valign='top'><table border='0' cellspacing='0' cellpadding='0'> <tr> <td align='left' valign='top'><a href='http://www.mdgmonitor.org/factsheets_00.cfm?c=COD'><img src='files/drcongo.jpg' alt='image' width='200' border='0' align='left' /></a></td> <td align='left' valign='middle'><p><strong><font size='3'>Total Population (millions):</font> </strong>57.55</p><p><strong><font size'3'><a href='http://unstats.un.org/unsd/cdb/cdb_dict_xrxx.asp?def_code=63'>GDP</a> per capita (PPP US$):</font></strong> 759 </p><p><font size='3'><strong>2006 <a href='http://hdr.undp.org/hdr2006/statistics/indices/default.cfm' target='_blank'>Human Development Index</a> (Rank 1-177):</strong> </font>167 </p></td> </tr> </table></td> </tr> <tr> <td align='left' valign='top'><font color='#003F7C' size='5'><strong>Recovering from armed conflict</strong></font></td> </tr> <tr> <td align='left' valign='top'><p><font color='#000000'>The Democratic Republic of the Congo is emerging from a tumultuous period marked by large-scale armed conflict, a weakening of the authority of the State and economic instability. Since 2001 the government has adopted a three-stage strategy for recovery: stabilization, revitalization, and a return to sustainable development. The government’s difficulty in assuring security in much of the country, and particularly in Eastern Congo, remain obstacles to achieving the MDGs – especially the goals relating to HIV/AIDS and hunger.</font></p></td> </tr> <tr> <td align='left' valign='top'><a href='http://www.mdgmonitor.org/factsheets_00.cfm?c=COD'>Read more... </a></td> </tr> <tr> <td align='right' valign='top'><p>Read related articles on <a href='http://news.google.com/news?hl=en&ned=us&ie=UTF-8&q=DRC+and+%22millennium+development+goals%22'>Google News</a></p></td> </tr> <tr> <td align='right' valign='top'>&nbsp;</td> </tr> <tr> <td align='center'><table border='0' cellpadding='0' cellspacing='0'> <tr> <td align='right' valign='middle'><a href='http://www.un.org/'><img src='files/un_logo_small.png' alt='UN logo' border='0' /></a></td> <td align='left' valign='middle'><font color='#666666'>The  <a href="http://www.un.org/millenniumgoals/" target="_blank">Millennium Development Goals </a>(MDGs) were laid out by the leaders of the world in 2000. They include  halving extreme poverty, halting the spread of HIV/AIDS and   providing universal primary education, all by 2015.</font></td> </tr> </table></td> </tr> </table>]]></description>
			<styleUrl>#text_photo_banner</styleUrl>
			<Point>
				<coordinates>15.319999,-4.309999,0</coordinates>
			</Point>
		</Placemark>
		<Placemark>
			<name>Djibouti</name>
			<visibility>0</visibility>
			<address>http://www.mdgmonitor.org/factsheets_00.cfm?c=DJI</address>
			<Snippet maxLines="2"></Snippet>
			<description><![CDATA[<table width='350' border='0' cellpadding='3' cellspacing='0' bgcolor='#FFFFFF'> <tr> <td align='left'><table border='0' cellspacing='0' cellpadding='0'> <tr> <td rowspan='2' align='left' valign='middle'><a href='http://www.mdgmonitor.org/'><img src='files/mdg_logo.png' alt='mdp logo' border='0' /></a></td> <td align='left' valign='bottom'><font color='#00486D' size='6'><b>MDG</b>MONITOR</td> </tr> <tr> <td align='right' valign='top'><font color='#00486D' size='4'>Track. Learn. Support.</font></td> </tr> </table></td> </tr> <tr> <td align='left' valign='top' bgcolor='#003F7C'><font color='#FFFFFF' size='5'><strong>Djibouti</strong></font></td> </tr> <tr> <td align='left' valign='top'><table border='0' cellspacing='0' cellpadding='0'> <tr> <td align='left' valign='top'><a href='http://www.mdgmonitor.org/factsheets_00.cfm?c=DJI'><img src='files/djibouti.jpg' alt='image' width='200' border='0' align='left' /></a></td> <td align='left' valign='middle'><p><strong><font size='3'>Total Population (millions):</font> </strong>0.79</p><p><strong><font size'3'><a href='http://unstats.un.org/unsd/cdb/cdb_dict_xrxx.asp?def_code=63'>GDP</a> per capita (PPP US$):</font></strong> 2018 </p><p><font size='3'><strong>2006 <a href='http://hdr.undp.org/hdr2006/statistics/indices/default.cfm' target='_blank'>Human Development Index</a> (Rank 1-177):</strong> </font>148 </p></td> </tr> </table></td> </tr> <tr> <td align='left' valign='top'><font color='#003F7C' size='5'><strong>42% in extreme poverty</strong></font></td> </tr> <tr> <td align='left' valign='top'><p><font color='#000000'>To reduce poverty, the government in Djibouti has adopted strategies in the fields of education; health; HIV/AIDS, malaria and tuberculosis; the environment; housing; and the integration of women.  There has been significant improvement in the education and health sectors. However, 42 percent of the population lives in extreme poverty.  Other priorities include malnutrition, and access to safe drinking water and decent housing.</font></p></td> </tr> <tr> <td align='left' valign='top'><a href='http://www.mdgmonitor.org/factsheets_00.cfm?c=DJI'>Read more... </a></td> </tr> <tr> <td align='right' valign='top'><p>Read related articles on <a href='http://news.google.com/archivesearch?hl=en&ned=us&ie=UTF-8&q=djibouti+and+%22millennium+development+goals%22'>Google News</a></p></td> </tr> <tr> <td align='right' valign='top'>&nbsp;</td> </tr> <tr> <td align='center'><table border='0' cellpadding='0' cellspacing='0'> <tr> <td align='right' valign='middle'><a href='http://www.un.org/'><img src='files/un_logo_small.png' alt='UN logo' border='0' /></a></td> <td align='left' valign='middle'><font color='#666666'>The  <a href="http://www.un.org/millenniumgoals/" target="_blank">Millennium Development Goals </a>(MDGs) were laid out by the leaders of the world in 2000. They include  halving extreme poverty, halting the spread of HIV/AIDS and   providing universal primary education, all by 2015.</font></td> </tr> </table></td> </tr> </table>]]></description>
			<styleUrl>#text_photo_banner</styleUrl>
			<Point>
				<coordinates>43.145798,11.588525,0</coordinates>
			</Point>
		</Placemark>
		<Placemark>
			<name>Dominica (Barbados)</name>
			<visibility>0</visibility>
			<address>http://www.mdgmonitor.org/factsheets_00.cfm?c=DMA</address>
			<Snippet maxLines="2"></Snippet>
			<description><![CDATA[<table width='350' border='0' cellpadding='3' cellspacing='0' bgcolor='#FFFFFF'> <tr> <td align='left'><table border='0' cellspacing='0' cellpadding='0'> <tr> <td rowspan='2' align='left' valign='middle'><a href='http://www.mdgmonitor.org/'><img src='files/mdg_logo.png' alt='mdp logo' border='0' /></a></td> <td align='left' valign='bottom'><font color='#00486D' size='6'><b>MDG</b>MONITOR</td> </tr> <tr> <td align='right' valign='top'><font color='#00486D' size='4'>Track. Learn. Support.</font></td> </tr> </table></td> </tr> <tr> <td align='left' valign='top' bgcolor='#003F7C'><font color='#FFFFFF' size='5'><strong>Dominica (Barbados)</strong></font></td> </tr> <tr> <td align='left' valign='top'><table border='0' cellspacing='0' cellpadding='0'> <tr> <td align='left' valign='top'><a href='http://www.mdgmonitor.org/factsheets_00.cfm?c=DMA'><img src='files/dominica.jpg' alt='image' width='200' border='0' align='left' /></a></td> <td align='left' valign='middle'><p><strong><font size='3'>Total Population (millions):</font> </strong>0.08</p><p><strong><font size'3'><a href='http://unstats.un.org/unsd/cdb/cdb_dict_xrxx.asp?def_code=63'>GDP</a> per capita (PPP US$):</font></strong> 6011 </p><p><font size='3'><strong>2006 <a href='http://hdr.undp.org/hdr2006/statistics/indices/default.cfm' target='_blank'>Human Development Index</a> (Rank 1-177):</strong> </font>68 </p></td> </tr> </table></td> </tr> <tr> <td align='left' valign='top'><font color='#003F7C' size='5'><strong>Mixed results</strong></font></td> </tr> <tr> <td align='left' valign='top'><p><font color='#000000'>Dominica has successfully achieved the basic requirements for MDG Nos. 2, 4, and 5 (poverty, child mortality, and maternal health). The country has partially achieved Goal Nos. 3, 7, and 8 (gender equality and the empowerment of women, environmental sustainability, and a global partnership for development). The remaining Goals, 1 and 6 (poverty, and halting the spread of HIV/AIDS, malaria, and other diseases), present lagging indicators and serious challenges.</font></p></td> </tr> <tr> <td align='left' valign='top'><a href='http://www.mdgmonitor.org/factsheets_00.cfm?c=DMA'>Read more... </a></td> </tr> <tr> <td align='right' valign='top'><p>Read related articles on <a href='http://news.google.com/archivesearch?hl=en&ned=us&ie=UTF-8&q=dominica+and+%22millennium+development+goals%22'>Google News</a></p></td> </tr> <tr> <td align='right' valign='top'>&nbsp;</td> </tr> <tr> <td align='center'><table border='0' cellpadding='0' cellspacing='0'> <tr> <td align='right' valign='middle'><a href='http://www.un.org/'><img src='files/un_logo_small.png' alt='UN logo' border='0' /></a></td> <td align='left' valign='middle'><font color='#666666'>The  <a href="http://www.un.org/millenniumgoals/" target="_blank">Millennium Development Goals </a>(MDGs) were laid out by the leaders of the world in 2000. They include  halving extreme poverty, halting the spread of HIV/AIDS and   providing universal primary education, all by 2015.</font></td> </tr> </table></td> </tr> </table>]]></description>
			<styleUrl>#text_photo_banner</styleUrl>
			<Point>
				<coordinates>-61.232411,15.175145,0</coordinates>
			</Point>
		</Placemark>
		<Placemark>
			<name>Dominican Republic</name>
			<visibility>0</visibility>
			<address>http://www.mdgmonitor.org/factsheets_00.cfm?c=DOM</address>
			<Snippet maxLines="2"></Snippet>
			<description><![CDATA[<table width='350' border='0' cellpadding='3' cellspacing='0' bgcolor='#FFFFFF'> <tr> <td align='left'><table border='0' cellspacing='0' cellpadding='0'> <tr> <td rowspan='2' align='left' valign='middle'><a href='http://www.mdgmonitor.org/'><img src='files/mdg_logo.png' alt='mdp logo' border='0' /></a></td> <td align='left' valign='bottom'><font color='#00486D' size='6'><b>MDG</b>MONITOR</td> </tr> <tr> <td align='right' valign='top'><font color='#00486D' size='4'>Track. Learn. Support.</font></td> </tr> </table></td> </tr> <tr> <td align='left' valign='top' bgcolor='#003F7C'><font color='#FFFFFF' size='5'><strong>Dominican Republic</strong></font></td> </tr> <tr> <td align='left' valign='top'><table border='0' cellspacing='0' cellpadding='0'> <tr> <td align='left' valign='top'><a href='http://www.mdgmonitor.org/factsheets_00.cfm?c=DOM'><img src='files/dominicanrepublic.jpg' alt='image' width='200' border='0' align='left' /></a></td> <td align='left' valign='middle'><p><strong><font size='3'>Total Population (millions):</font> </strong>8.89</p><p><strong><font size'3'><a href='http://unstats.un.org/unsd/cdb/cdb_dict_xrxx.asp?def_code=63'>GDP</a> per capita (PPP US$):</font></strong> 7579 </p><p><font size='3'><strong>2006 <a href='http://hdr.undp.org/hdr2006/statistics/indices/default.cfm' target='_blank'>Human Development Index</a> (Rank 1-177):</strong> </font>94 </p></td> </tr> </table></td> </tr> <tr> <td align='left' valign='top'><font color='#003F7C' size='5'><strong>The MDGs as a priority</strong></font></td> </tr> <tr> <td align='left' valign='top'><p><font color='#000000'>The Government of the Dominican Republic is treating the MDGs as a priority. UNDP and other United Nations organizations working in the country have helped implement a human development programme to be carried out in the third poorest province of the country.  In addition, a costing analysis in the Province of El Seibo has served as a benchmark and tool to study local needs and the design of specific, customized policies by government ministries.</font></p></td> </tr> <tr> <td align='left' valign='top'><a href='http://www.mdgmonitor.org/factsheets_00.cfm?c=DOM'>Read more... </a></td> </tr> <tr> <td align='right' valign='top'><p>Read related articles on <a href='http://news.google.com/archivesearch?hl=en&ned=us&ie=UTF-8&q=dominican+republic+and+%22millennium+development+goals%22'>Google News</a></p></td> </tr> <tr> <td align='right' valign='top'>&nbsp;</td> </tr> <tr> <td align='center'><table border='0' cellpadding='0' cellspacing='0'> <tr> <td align='right' valign='middle'><a href='http://www.un.org/'><img src='files/un_logo_small.png' alt='UN logo' border='0' /></a></td> <td align='left' valign='middle'><font color='#666666'>The  <a href="http://www.un.org/millenniumgoals/" target="_blank">Millennium Development Goals </a>(MDGs) were laid out by the leaders of the world in 2000. They include  halving extreme poverty, halting the spread of HIV/AIDS and   providing universal primary education, all by 2015.</font></td> </tr> </table></td> </tr> </table>]]></description>
			<styleUrl>#text_photo_banner</styleUrl>
			<Point>
				<coordinates>-69.910003,18.479999,0</coordinates>
			</Point>
		</Placemark>
		<Placemark>
			<name>Ecuador</name>
			<visibility>0</visibility>
			<address>http://www.mdgmonitor.org/factsheets_00.cfm?c=ECU</address>
			<Snippet maxLines="2"></Snippet>
			<description><![CDATA[<table width='350' border='0' cellpadding='3' cellspacing='0' bgcolor='#FFFFFF'> <tr> <td align='left'><table border='0' cellspacing='0' cellpadding='0'> <tr> <td rowspan='2' align='left' valign='middle'><a href='http://www.mdgmonitor.org/'><img src='files/mdg_logo.png' alt='mdp logo' border='0' /></a></td> <td align='left' valign='bottom'><font color='#00486D' size='6'><b>MDG</b>MONITOR</td> </tr> <tr> <td align='right' valign='top'><font color='#00486D' size='4'>Track. Learn. Support.</font></td> </tr> </table></td> </tr> <tr> <td align='left' valign='top' bgcolor='#003F7C'><font color='#FFFFFF' size='5'><strong>Ecuador</strong></font></td> </tr> <tr> <td align='left' valign='top'><table border='0' cellspacing='0' cellpadding='0'> <tr> <td align='left' valign='top'><a href='http://www.mdgmonitor.org/factsheets_00.cfm?c=ECU'><img src='files/ecuador.jpg' alt='image' width='200' border='0' align='left' /></a></td> <td align='left' valign='middle'><p><strong><font size='3'>Total Population (millions):</font> </strong>13.23</p><p><strong><font size'3'><a href='http://unstats.un.org/unsd/cdb/cdb_dict_xrxx.asp?def_code=63'>GDP</a> per capita (PPP US$):</font></strong> 4272 </p><p><font size='3'><strong>2006 <a href='http://hdr.undp.org/hdr2006/statistics/indices/default.cfm' target='_blank'>Human Development Index</a> (Rank 1-177):</strong> </font>83 </p></td> </tr> </table></td> </tr> <tr> <td align='left' valign='top'><font color='#003F7C' size='5'><strong>Effective ownership of the MDGs</strong></font></td> </tr> <tr> <td align='left' valign='top'><p><font color='#000000'>Over the last three years, Ecuador has made big strides in taking effective ownership of the MDGs.  In 2006, UNDP, the World Bank, CONCOPE, AECI, the Latin American Faculty of Social Sciences (FLACSO) and the Government established the Social Centre for Millennium Research, located at FLACSO in the capital, Quito. The Centre is the leading government adviser for the MDGs.</font></p></td> </tr> <tr> <td align='left' valign='top'><a href='http://www.mdgmonitor.org/factsheets_00.cfm?c=ECU'>Read more... </a></td> </tr> <tr> <td align='right' valign='top'><p>Read related articles on <a href='http://news.google.com/archivesearch?hl=en&ned=us&ie=UTF-8&q=ecuador+and+%22millennium+development+goals%22'>Google News</a></p></td> </tr> <tr> <td align='right' valign='top'>&nbsp;</td> </tr> <tr> <td align='center'><table border='0' cellpadding='0' cellspacing='0'> <tr> <td align='right' valign='middle'><a href='http://www.un.org/'><img src='files/un_logo_small.png' alt='UN logo' border='0' /></a></td> <td align='left' valign='middle'><font color='#666666'>The  <a href="http://www.un.org/millenniumgoals/" target="_blank">Millennium Development Goals </a>(MDGs) were laid out by the leaders of the world in 2000. They include  halving extreme poverty, halting the spread of HIV/AIDS and   providing universal primary education, all by 2015.</font></td> </tr> </table></td> </tr> </table>]]></description>
			<styleUrl>#text_photo_banner</styleUrl>
			<Point>
				<coordinates>-78.51560662,-0.224275915,0</coordinates>
			</Point>
		</Placemark>
		<Placemark>
			<name>Egypt</name>
			<visibility>0</visibility>
			<address>http://www.mdgmonitor.org/factsheets_00.cfm?c=EGY</address>
			<Snippet maxLines="2"></Snippet>
			<description><![CDATA[<table width='350' border='0' cellpadding='3' cellspacing='0' bgcolor='#FFFFFF'> <tr> <td align='left'><table border='0' cellspacing='0' cellpadding='0'> <tr> <td rowspan='2' align='left' valign='middle'><a href='http://www.mdgmonitor.org/'><img src='files/mdg_logo.png' alt='mdp logo' border='0' /></a></td> <td align='left' valign='bottom'><font color='#00486D' size='6'><b>MDG</b>MONITOR</td> </tr> <tr> <td align='right' valign='top'><font color='#00486D' size='4'>Track. Learn. Support.</font></td> </tr> </table></td> </tr> <tr> <td align='left' valign='top' bgcolor='#003F7C'><font color='#FFFFFF' size='5'><strong>Egypt</strong></font></td> </tr> <tr> <td align='left' valign='top'><table border='0' cellspacing='0' cellpadding='0'> <tr> <td align='left' valign='top'><a href='http://www.mdgmonitor.org/factsheets_00.cfm?c=EGY'><img src='files/egypt.jpg' alt='image' width='200' border='0' align='left' /></a></td> <td align='left' valign='middle'><p><strong><font size='3'>Total Population (millions):</font> </strong>74.03</p><p><strong><font size'3'><a href='http://unstats.un.org/unsd/cdb/cdb_dict_xrxx.asp?def_code=63'>GDP</a> per capita (PPP US$):</font></strong> 4455 </p><p><font size='3'><strong>2006 <a href='http://hdr.undp.org/hdr2006/statistics/indices/default.cfm' target='_blank'>Human Development Index</a> (Rank 1-177):</strong> </font>111 </p></td> </tr> </table></td> </tr> <tr> <td align='left' valign='top'><font color='#003F7C' size='5'><strong>Volnteerism as a strength</strong></font></td> </tr> <tr> <td align='left' valign='top'><p><font color='#000000'>Egypt’s UN programmes involve prevention and treatment of HIV/AIDS among vulnerable women; fostering private sector involvement in workplace HIV/AIDS policies; and maximizing the involvement of non-governmental organizations in HIV/AIDS projects. Another UN program, the Girls Education Initiative, provides access to quality basic education to nearly 20,000 girls in seven impoverished areas.  The government is also working to stir public awareness of the MDG campaign with events like “Sailing the Nile for the Millennium Development Goals,” a yearly outreach project aimed at helping communities in northern Egypt build the capacity to implement the MDGs through volunteerism.</font></p></td> </tr> <tr> <td align='left' valign='top'><a href='http://www.mdgmonitor.org/factsheets_00.cfm?c=EGY'>Read more... </a></td> </tr> <tr> <td align='right' valign='top'><p>Read related articles on <a href='http://news.google.com/archivesearch?hl=en&ned=us&ie=UTF-8&q=egypt+and+%22millennium+development+goals%22'>Google News</a></p></td> </tr> <tr> <td align='right' valign='top'>&nbsp;</td> </tr> <tr> <td align='center'><table border='0' cellpadding='0' cellspacing='0'> <tr> <td align='right' valign='middle'><a href='http://www.un.org/'><img src='files/un_logo_small.png' alt='UN logo' border='0' /></a></td> <td align='left' valign='middle'><font color='#666666'>The  <a href="http://www.un.org/millenniumgoals/" target="_blank">Millennium Development Goals </a>(MDGs) were laid out by the leaders of the world in 2000. They include  halving extreme poverty, halting the spread of HIV/AIDS and   providing universal primary education, all by 2015.</font></td> </tr> </table></td> </tr> </table>]]></description>
			<styleUrl>#text_photo_banner</styleUrl>
			<Point>
				<coordinates>31.25,30.05999900000001,0</coordinates>
			</Point>
		</Placemark>
		<Placemark>
			<name>El Salvador</name>
			<visibility>0</visibility>
			<address>http://www.mdgmonitor.org/factsheets_00.cfm?c=SLV</address>
			<Snippet maxLines="2"></Snippet>
			<description><![CDATA[<table width='350' border='0' cellpadding='3' cellspacing='0' bgcolor='#FFFFFF'> <tr> <td align='left'><table border='0' cellspacing='0' cellpadding='0'> <tr> <td rowspan='2' align='left' valign='middle'><a href='http://www.mdgmonitor.org/'><img src='files/mdg_logo.png' alt='mdp logo' border='0' /></a></td> <td align='left' valign='bottom'><font color='#00486D' size='6'><b>MDG</b>MONITOR</td> </tr> <tr> <td align='right' valign='top'><font color='#00486D' size='4'>Track. Learn. Support.</font></td> </tr> </table></td> </tr> <tr> <td align='left' valign='top' bgcolor='#003F7C'><font color='#FFFFFF' size='5'><strong>El Salvador</strong></font></td> </tr> <tr> <td align='left' valign='top'><table border='0' cellspacing='0' cellpadding='0'> <tr> <td align='left' valign='top'><a href='http://www.mdgmonitor.org/factsheets_00.cfm?c=SLV'><img src='files/elsalvador.jpg' alt='image' width='200' border='0' align='left' /></a></td> <td align='left' valign='middle'><p><strong><font size='3'>Total Population (millions):</font> </strong>6.88</p><p><strong><font size'3'><a href='http://unstats.un.org/unsd/cdb/cdb_dict_xrxx.asp?def_code=63'>GDP</a> per capita (PPP US$):</font></strong> 5301 </p><p><font size='3'><strong>2006 <a href='http://hdr.undp.org/hdr2006/statistics/indices/default.cfm' target='_blank'>Human Development Index</a> (Rank 1-177):</strong> </font>101 </p></td> </tr> </table></td> </tr> <tr> <td align='left' valign='top'><font color='#003F7C' size='5'><strong>Building networks for the MDGs</strong></font></td> </tr> <tr> <td align='left' valign='top'><p><font color='#000000'>The government has developed several programmes to meet the MDGs. One of these includes the Red Solidaria (Solidarity Network), launched in 2005, which provides relief to families living in extreme poverty in rural areas. An educational module has been produced to bring the MDGs into the National Education Plan 2021. UNDP has prepared the Teachers Manual: Learning about Human Development and the MDGs, which provides teachers with a general support tool for different subjects taught in primary school.</font></p></td> </tr> <tr> <td align='left' valign='top'><a href='http://www.mdgmonitor.org/factsheets_00.cfm?c=SLV'>Read more... </a></td> </tr> <tr> <td align='right' valign='top'><p>Read related articles on <a href='http://news.google.com/archivesearch?hl=en&ned=us&ie=UTF-8&q=%22el+salvador%22+and+%22millennium+development+goals%22'>Google News</a></p></td> </tr> <tr> <td align='right' valign='top'>&nbsp;</td> </tr> <tr> <td align='center'><table border='0' cellpadding='0' cellspacing='0'> <tr> <td align='right' valign='middle'><a href='http://www.un.org/'><img src='files/un_logo_small.png' alt='UN logo' border='0' /></a></td> <td align='left' valign='middle'><font color='#666666'>The  <a href="http://www.un.org/millenniumgoals/" target="_blank">Millennium Development Goals </a>(MDGs) were laid out by the leaders of the world in 2000. They include  halving extreme poverty, halting the spread of HIV/AIDS and   providing universal primary education, all by 2015.</font></td> </tr> </table></td> </tr> </table>]]></description>
			<styleUrl>#text_photo_banner</styleUrl>
			<Point>
				<coordinates>-89.19000200000002,13.689999,0</coordinates>
			</Point>
		</Placemark>
		<Placemark>
			<name>Equatorial Guinea</name>
			<visibility>0</visibility>
			<address>http://www.mdgmonitor.org/factsheets_00.cfm?c=GNQ</address>
			<Snippet maxLines="2"></Snippet>
			<description><![CDATA[<table width='350' border='0' cellpadding='3' cellspacing='0' bgcolor='#FFFFFF'> <tr> <td align='left'><table border='0' cellspacing='0' cellpadding='0'> <tr> <td rowspan='2' align='left' valign='middle'><a href='http://www.mdgmonitor.org/'><img src='files/mdg_logo.png' alt='mdp logo' border='0' /></a></td> <td align='left' valign='bottom'><font color='#00486D' size='6'><b>MDG</b>MONITOR</td> </tr> <tr> <td align='right' valign='top'><font color='#00486D' size='4'>Track. Learn. Support.</font></td> </tr> </table></td> </tr> <tr> <td align='left' valign='top' bgcolor='#003F7C'><font color='#FFFFFF' size='5'><strong>Equatorial Guinea</strong></font></td> </tr> <tr> <td align='left' valign='top'><table border='0' cellspacing='0' cellpadding='0'> <tr> <td align='left' valign='top'><a href='http://www.mdgmonitor.org/factsheets_00.cfm?c=GNQ'><img src='files/eqGuinea.jpg' alt='image' width='200' border='0' align='left' /></a></td> <td align='left' valign='middle'><p><strong><font size='3'>Total Population (millions):</font> </strong>0.5</p><p><strong><font size'3'><a href='http://unstats.un.org/unsd/cdb/cdb_dict_xrxx.asp?def_code=63'>GDP</a> per capita (PPP US$):</font></strong> NA </p><p><font size='3'><strong>2006 <a href='http://hdr.undp.org/hdr2006/statistics/indices/default.cfm' target='_blank'>Human Development Index</a> (Rank 1-177):</strong> </font>120 </p></td> </tr> </table></td> </tr> <tr> <td align='left' valign='top'><font color='#003F7C' size='5'><strong>Budget constraints</strong></font></td> </tr> <tr> <td align='left' valign='top'><p><font color='#000000'>Over the last few years, the government has been preparing policies and sectoral development plans, but this implementation has run into serious budgetary constraints. However, the available data indicate that the MDGs will be achievable, provided the country makes rational use of its human and financial resources, pursues ongoing training and staff development policies for civil servants, and takes full advantage of foreign aid.</font></p></td> </tr> <tr> <td align='left' valign='top'><a href='http://www.mdgmonitor.org/factsheets_00.cfm?c=GNQ'>Read more... </a></td> </tr> <tr> <td align='right' valign='top'><p>Read related articles on <a href='http://news.google.com/archivesearch?q=%22equatorial+guinea%22+and+%22millennium+development+goals%22&hl=en&ned=us&ie=UTF-8'>Google News</a></p></td> </tr> <tr> <td align='right' valign='top'>&nbsp;</td> </tr> <tr> <td align='center'><table border='0' cellpadding='0' cellspacing='0'> <tr> <td align='right' valign='middle'><a href='http://www.un.org/'><img src='files/un_logo_small.png' alt='UN logo' border='0' /></a></td> <td align='left' valign='middle'><font color='#666666'>The  <a href="http://www.un.org/millenniumgoals/" target="_blank">Millennium Development Goals </a>(MDGs) were laid out by the leaders of the world in 2000. They include  halving extreme poverty, halting the spread of HIV/AIDS and   providing universal primary education, all by 2015.</font></td> </tr> </table></td> </tr> </table>]]></description>
			<styleUrl>#text_photo_banner</styleUrl>
			<Point>
				<coordinates>8.780827630999999,3.754828987,0</coordinates>
			</Point>
		</Placemark>
		<Placemark>
			<name>Fiji</name>
			<visibility>0</visibility>
			<address>http://www.mdgmonitor.org/factsheets_00.cfm?c=FJI</address>
			<Snippet maxLines="2"></Snippet>
			<description><![CDATA[<table width='350' border='0' cellpadding='3' cellspacing='0' bgcolor='#FFFFFF'> <tr> <td align='left'><table border='0' cellspacing='0' cellpadding='0'> <tr> <td rowspan='2' align='left' valign='middle'><a href='http://www.mdgmonitor.org/'><img src='files/mdg_logo.png' alt='mdp logo' border='0' /></a></td> <td align='left' valign='bottom'><font color='#00486D' size='6'><b>MDG</b>MONITOR</td> </tr> <tr> <td align='right' valign='top'><font color='#00486D' size='4'>Track. Learn. Support.</font></td> </tr> </table></td> </tr> <tr> <td align='left' valign='top' bgcolor='#003F7C'><font color='#FFFFFF' size='5'><strong>Fiji</strong></font></td> </tr> <tr> <td align='left' valign='top'><table border='0' cellspacing='0' cellpadding='0'> <tr> <td align='left' valign='top'><a href='http://www.mdgmonitor.org/factsheets_00.cfm?c=FJI'><img src='files/fiji.jpg' alt='image' width='200' border='0' align='left' /></a></td> <td align='left' valign='middle'><p><strong><font size='3'>Total Population (millions):</font> </strong>0.85</p><p><strong><font size'3'><a href='http://unstats.un.org/unsd/cdb/cdb_dict_xrxx.asp?def_code=63'>GDP</a> per capita (PPP US$):</font></strong> 5958 </p><p><font size='3'><strong>2006 <a href='http://hdr.undp.org/hdr2006/statistics/indices/default.cfm' target='_blank'>Human Development Index</a> (Rank 1-177):</strong> </font>90 </p></td> </tr> </table></td> </tr> <tr> <td align='left' valign='top'><font color='#003F7C' size='5'><strong>Ten Pacific island countries</strong></font></td> </tr> <tr> <td align='left' valign='top'><p><font color='#000000'>Pacific Island leaders have committed to achieving the MDGs, and their leadership will be crucial in realising progress in 10 Pacific Island countries, including Fiji. The formation of MDG National Task Forces and Committees across these 10 countries shows that there is a will to accomplish the MDGs. However a widely acknowledged difficulty in the region is the lack of monitoring.</font></p></td> </tr> <tr> <td align='left' valign='top'><a href='http://www.mdgmonitor.org/factsheets_00.cfm?c=FJI'>Read more... </a></td> </tr> <tr> <td align='right' valign='top'><p>Read related articles on <a href='http://news.google.com/archivesearch?q=fiji+and+%22millennium+development+goals%22&hl=en&ned=us&ie=UTF-8'>Google News</a></p></td> </tr> <tr> <td align='right' valign='top'>&nbsp;</td> </tr> <tr> <td align='center'><table border='0' cellpadding='0' cellspacing='0'> <tr> <td align='right' valign='middle'><a href='http://www.un.org/'><img src='files/un_logo_small.png' alt='UN logo' border='0' /></a></td> <td align='left' valign='middle'><font color='#666666'>The  <a href="http://www.un.org/millenniumgoals/" target="_blank">Millennium Development Goals </a>(MDGs) were laid out by the leaders of the world in 2000. They include  halving extreme poverty, halting the spread of HIV/AIDS and   providing universal primary education, all by 2015.</font></td> </tr> </table></td> </tr> </table>]]></description>
			<styleUrl>#text_photo_banner</styleUrl>
			<Point>
				<coordinates>178.429992,-18.129999,0</coordinates>
			</Point>
		</Placemark>
		<Placemark>
			<name>Gabon</name>
			<visibility>0</visibility>
			<address>http://www.mdgmonitor.org/factsheets_00.cfm?c=GAB</address>
			<Snippet maxLines="2"></Snippet>
			<description><![CDATA[<table width='350' border='0' cellpadding='3' cellspacing='0' bgcolor='#FFFFFF'> <tr> <td align='left'><table border='0' cellspacing='0' cellpadding='0'> <tr> <td rowspan='2' align='left' valign='middle'><a href='http://www.mdgmonitor.org/'><img src='files/mdg_logo.png' alt='mdp logo' border='0' /></a></td> <td align='left' valign='bottom'><font color='#00486D' size='6'><b>MDG</b>MONITOR</td> </tr> <tr> <td align='right' valign='top'><font color='#00486D' size='4'>Track. Learn. Support.</font></td> </tr> </table></td> </tr> <tr> <td align='left' valign='top' bgcolor='#003F7C'><font color='#FFFFFF' size='5'><strong>Gabon</strong></font></td> </tr> <tr> <td align='left' valign='top'><table border='0' cellspacing='0' cellpadding='0'> <tr> <td align='left' valign='top'><a href='http://www.mdgmonitor.org/factsheets_00.cfm?c=GAB'><img src='files/gabon.jpg' alt='image' width='200' border='0' align='left' /></a></td> <td align='left' valign='middle'><p><strong><font size='3'>Total Population (millions):</font> </strong>1.38</p><p><strong><font size'3'><a href='http://unstats.un.org/unsd/cdb/cdb_dict_xrxx.asp?def_code=63'>GDP</a> per capita (PPP US$):</font></strong> 6528 </p><p><font size='3'><strong>2006 <a href='http://hdr.undp.org/hdr2006/statistics/indices/default.cfm' target='_blank'>Human Development Index</a> (Rank 1-177):</strong> </font>124 </p></td> </tr> </table></td> </tr> <tr> <td align='left' valign='top'><font color='#003F7C' size='5'><strong>Natural and human potential</strong></font></td> </tr> <tr> <td align='left' valign='top'><p><font color='#000000'>Gabon’s immense natural and human potential stands in sharp contrast to the level of poverty that affects about one-third of its population. In 2005 the net rate of enrolment in primary school was estimated at 92.44 percent, and the adult literacy rate at 85.4 percent, one of the highest in sub-Saharan Africa. However, the under-five mortality rate was 87 deaths per 1,000 live births, a high rate given the income level of the country. The infant mortality rate of 57 in 1,000 was also one of the concerns facing Gabon.</font></p></td> </tr> <tr> <td align='left' valign='top'><a href='http://www.mdgmonitor.org/factsheets_00.cfm?c=GAB'>Read more... </a></td> </tr> <tr> <td align='right' valign='top'><p>Read related articles on <a href='http://news.google.com/archivesearch?q=gabon+and+%22millennium+development+goals%22&hl=en&ned=us&ie=UTF-8'>Google News</a></p></td> </tr> <tr> <td align='right' valign='top'>&nbsp;</td> </tr> <tr> <td align='center'><table border='0' cellpadding='0' cellspacing='0'> <tr> <td align='right' valign='middle'><a href='http://www.un.org/'><img src='files/un_logo_small.png' alt='UN logo' border='0' /></a></td> <td align='left' valign='middle'><font color='#666666'>The  <a href="http://www.un.org/millenniumgoals/" target="_blank">Millennium Development Goals </a>(MDGs) were laid out by the leaders of the world in 2000. They include  halving extreme poverty, halting the spread of HIV/AIDS and   providing universal primary education, all by 2015.</font></td> </tr> </table></td> </tr> </table>]]></description>
			<styleUrl>#text_photo_banner</styleUrl>
			<Point>
				<coordinates>9.449999,0.389999,0</coordinates>
			</Point>
		</Placemark>
		<Placemark>
			<name>Gambia</name>
			<visibility>0</visibility>
			<address>http://www.mdgmonitor.org/factsheets_00.cfm?c=GMB</address>
			<Snippet maxLines="2"></Snippet>
			<description><![CDATA[<table width='350' border='0' cellpadding='3' cellspacing='0' bgcolor='#FFFFFF'> <tr> <td align='left'><table border='0' cellspacing='0' cellpadding='0'> <tr> <td rowspan='2' align='left' valign='middle'><a href='http://www.mdgmonitor.org/'><img src='files/mdg_logo.png' alt='mdp logo' border='0' /></a></td> <td align='left' valign='bottom'><font color='#00486D' size='6'><b>MDG</b>MONITOR</td> </tr> <tr> <td align='right' valign='top'><font color='#00486D' size='4'>Track. Learn. Support.</font></td> </tr> </table></td> </tr> <tr> <td align='left' valign='top' bgcolor='#003F7C'><font color='#FFFFFF' size='5'><strong>Gambia</strong></font></td> </tr> <tr> <td align='left' valign='top'><table border='0' cellspacing='0' cellpadding='0'> <tr> <td align='left' valign='top'><a href='http://www.mdgmonitor.org/factsheets_00.cfm?c=GMB'><img src='files/gambia.jpg' alt='image' width='200' border='0' align='left' /></a></td> <td align='left' valign='middle'><p><strong><font size='3'>Total Population (millions):</font> </strong>1.52</p><p><strong><font size'3'><a href='http://unstats.un.org/unsd/cdb/cdb_dict_xrxx.asp?def_code=63'>GDP</a> per capita (PPP US$):</font></strong> 1991 </p><p><font size='3'><strong>2006 <a href='http://hdr.undp.org/hdr2006/statistics/indices/default.cfm' target='_blank'>Human Development Index</a> (Rank 1-177):</strong> </font>155 </p></td> </tr> </table></td> </tr> <tr> <td align='left' valign='top'><font color='#003F7C' size='5'><strong>Building an MDG "task force"</strong></font></td> </tr> <tr> <td align='left' valign='top'><p><font color='#000000'>The Government of the Gambia has committed itself to integrating the MDGs into its planning processes. With the assistance of the United Nations Development Programme, an MDG Task Force comprising government, the private sector, civil society, and development partners was established under the Office of the President. Workshops have also been held for media practitioners, National Assembly Members, representatives of non-governmental organizations, civil society, and women’s groups.</font></p></td> </tr> <tr> <td align='left' valign='top'><a href='http://www.mdgmonitor.org/factsheets_00.cfm?c=GMB'>Read more... </a></td> </tr> <tr> <td align='right' valign='top'><p>Read related articles on <a href='http://news.google.com/archivesearch?q=gambia+and+%22millennium+development+goals%22&hl=en&ned=us&ie=UTF-8'>Google News</a></p></td> </tr> <tr> <td align='right' valign='top'>&nbsp;</td> </tr> <tr> <td align='center'><table border='0' cellpadding='0' cellspacing='0'> <tr> <td align='right' valign='middle'><a href='http://www.un.org/'><img src='files/un_logo_small.png' alt='UN logo' border='0' /></a></td> <td align='left' valign='middle'><font color='#666666'>The  <a href="http://www.un.org/millenniumgoals/" target="_blank">Millennium Development Goals </a>(MDGs) were laid out by the leaders of the world in 2000. They include  halving extreme poverty, halting the spread of HIV/AIDS and   providing universal primary education, all by 2015.</font></td> </tr> </table></td> </tr> </table>]]></description>
			<styleUrl>#text_photo_banner</styleUrl>
			<Point>
				<coordinates>-16.57521831,13.45508198,0</coordinates>
			</Point>
		</Placemark>
		<Placemark>
			<name>Georgia</name>
			<visibility>0</visibility>
			<address>http://www.mdgmonitor.org/factsheets_00.cfm?c=GEO</address>
			<Snippet maxLines="2"></Snippet>
			<description><![CDATA[<table width='350' border='0' cellpadding='3' cellspacing='0' bgcolor='#FFFFFF'> <tr> <td align='left'><table border='0' cellspacing='0' cellpadding='0'> <tr> <td rowspan='2' align='left' valign='middle'><a href='http://www.mdgmonitor.org/'><img src='files/mdg_logo.png' alt='mdp logo' border='0' /></a></td> <td align='left' valign='bottom'><font color='#00486D' size='6'><b>MDG</b>MONITOR</td> </tr> <tr> <td align='right' valign='top'><font color='#00486D' size='4'>Track. Learn. Support.</font></td> </tr> </table></td> </tr> <tr> <td align='left' valign='top' bgcolor='#003F7C'><font color='#FFFFFF' size='5'><strong>Georgia</strong></font></td> </tr> <tr> <td align='left' valign='top'><table border='0' cellspacing='0' cellpadding='0'> <tr> <td align='left' valign='top'><a href='http://www.mdgmonitor.org/factsheets_00.cfm?c=GEO'><img src='files/georgia.jpg' alt='image' width='200' border='0' align='left' /></a></td> <td align='left' valign='middle'><p><strong><font size='3'>Total Population (millions):</font> </strong>4.47</p><p><strong><font size'3'><a href='http://unstats.un.org/unsd/cdb/cdb_dict_xrxx.asp?def_code=63'>GDP</a> per capita (PPP US$):</font></strong> 3177 </p><p><font size='3'><strong>2006 <a href='http://hdr.undp.org/hdr2006/statistics/indices/default.cfm' target='_blank'>Human Development Index</a> (Rank 1-177):</strong> </font>97 </p></td> </tr> </table></td> </tr> <tr> <td align='left' valign='top'><font color='#003F7C' size='5'><strong>Governance reforms</strong></font></td> </tr> <tr> <td align='left' valign='top'><p><font color='#000000'>The current government, which came into power after the “Rose Revolution” in November 2003, has begun instituting important governance reforms to achieve the MDGs. These include anti-corruption measures, strengthened law enforcement and improved public finance. Providing expertise and advice, UNDP in Georgia has been successful in responding to the immediate needs of the government. This support has included provision of a senior advisor to the President on economic reforms, as well as advisory services on social sector reforms with particular attention to the health sector and the pension system.</font></p></td> </tr> <tr> <td align='left' valign='top'><a href='http://www.mdgmonitor.org/factsheets_00.cfm?c=GEO'>Read more... </a></td> </tr> <tr> <td align='right' valign='top'><p>Read related articles on <a href='http://news.google.com/archivesearch?q=georgia+and+%22millennium+development+goals%22&hl=en&ned=us&ie=UTF-8'>Google News</a></p></td> </tr> <tr> <td align='right' valign='top'>&nbsp;</td> </tr> <tr> <td align='center'><table border='0' cellpadding='0' cellspacing='0'> <tr> <td align='right' valign='middle'><a href='http://www.un.org/'><img src='files/un_logo_small.png' alt='UN logo' border='0' /></a></td> <td align='left' valign='middle'><font color='#666666'>The  <a href="http://www.un.org/millenniumgoals/" target="_blank">Millennium Development Goals </a>(MDGs) were laid out by the leaders of the world in 2000. They include  halving extreme poverty, halting the spread of HIV/AIDS and   providing universal primary education, all by 2015.</font></td> </tr> </table></td> </tr> </table>]]></description>
			<styleUrl>#text_photo_banner</styleUrl>
			<Point>
				<coordinates>44.79000000000001,41.720001,0</coordinates>
			</Point>
		</Placemark>
		<Placemark>
			<name>Ghana</name>
			<visibility>0</visibility>
			<address>http://www.mdgmonitor.org/factsheets_00.cfm?c=GHA</address>
			<Snippet maxLines="2"></Snippet>
			<description><![CDATA[<table width='350' border='0' cellpadding='3' cellspacing='0' bgcolor='#FFFFFF'> <tr> <td align='left'><table border='0' cellspacing='0' cellpadding='0'> <tr> <td rowspan='2' align='left' valign='middle'><a href='http://www.mdgmonitor.org/'><img src='files/mdg_logo.png' alt='mdp logo' border='0' /></a></td> <td align='left' valign='bottom'><font color='#00486D' size='6'><b>MDG</b>MONITOR</td> </tr> <tr> <td align='right' valign='top'><font color='#00486D' size='4'>Track. Learn. Support.</font></td> </tr> </table></td> </tr> <tr> <td align='left' valign='top' bgcolor='#003F7C'><font color='#FFFFFF' size='5'><strong>Ghana</strong></font></td> </tr> <tr> <td align='left' valign='top'><table border='0' cellspacing='0' cellpadding='0'> <tr> <td align='left' valign='top'><a href='http://www.mdgmonitor.org/factsheets_00.cfm?c=GHA'><img src='files/ghana.jpg' alt='image' width='200' border='0' align='left' /></a></td> <td align='left' valign='middle'><p><strong><font size='3'>Total Population (millions):</font> </strong>22.11</p><p><strong><font size'3'><a href='http://unstats.un.org/unsd/cdb/cdb_dict_xrxx.asp?def_code=63'>GDP</a> per capita (PPP US$):</font></strong> 2402 </p><p><font size='3'><strong>2006 <a href='http://hdr.undp.org/hdr2006/statistics/indices/default.cfm' target='_blank'>Human Development Index</a> (Rank 1-177):</strong> </font>136 </p></td> </tr> </table></td> </tr> <tr> <td align='left' valign='top'><font color='#003F7C' size='5'><strong>Family planning, health and education</strong></font></td> </tr> <tr> <td align='left' valign='top'><p><font color='#000000'>Ghana has sustained a period of economic stability, with income poverty levels declining from 42 per cent in 1997 to around 35 per cent in 2005.  Although there has been steady progress in some areas towards achieving the MDGs, challenges remain.  The government has embarked on measures to address these, including expanding nationwide fee exemptions for maternal deliveries; introducing a basic education grant as well as a school feeding programme; refocusing attention on family planning and adolescent sexual health; and instituting a national health insurance scheme with exemptions for the poorest.</font></p></td> </tr> <tr> <td align='left' valign='top'><a href='http://www.mdgmonitor.org/factsheets_00.cfm?c=GHA'>Read more... </a></td> </tr> <tr> <td align='right' valign='top'><p>Read related articles on <a href='http://news.google.com/archivesearch?q=ghana+and+%22millennium+development+goals%22&hl=en&ned=us&ie=UTF-8'>Google News</a></p></td> </tr> <tr> <td align='right' valign='top'>&nbsp;</td> </tr> <tr> <td align='center'><table border='0' cellpadding='0' cellspacing='0'> <tr> <td align='right' valign='middle'><a href='http://www.un.org/'><img src='files/un_logo_small.png' alt='UN logo' border='0' /></a></td> <td align='left' valign='middle'><font color='#666666'>The  <a href="http://www.un.org/millenniumgoals/" target="_blank">Millennium Development Goals </a>(MDGs) were laid out by the leaders of the world in 2000. They include  halving extreme poverty, halting the spread of HIV/AIDS and   providing universal primary education, all by 2015.</font></td> </tr> </table></td> </tr> </table>]]></description>
			<styleUrl>#text_photo_banner</styleUrl>
			<Point>
				<coordinates>-0.2,5.559999,0</coordinates>
			</Point>
		</Placemark>
		<Placemark>
			<name>Grenada</name>
			<visibility>0</visibility>
			<address>http://www.mdgmonitor.org/factsheets_00.cfm?c=GRD</address>
			<Snippet maxLines="2"></Snippet>
			<description><![CDATA[<table width='350' border='0' cellpadding='3' cellspacing='0' bgcolor='#FFFFFF'> <tr> <td align='left'><table border='0' cellspacing='0' cellpadding='0'> <tr> <td rowspan='2' align='left' valign='middle'><a href='http://www.mdgmonitor.org/'><img src='files/mdg_logo.png' alt='mdp logo' border='0' /></a></td> <td align='left' valign='bottom'><font color='#00486D' size='6'><b>MDG</b>MONITOR</td> </tr> <tr> <td align='right' valign='top'><font color='#00486D' size='4'>Track. Learn. Support.</font></td> </tr> </table></td> </tr> <tr> <td align='left' valign='top' bgcolor='#003F7C'><font color='#FFFFFF' size='5'><strong>Grenada</strong></font></td> </tr> <tr> <td align='left' valign='top'><table border='0' cellspacing='0' cellpadding='0'> <tr> <td align='left' valign='top'><a href='http://www.mdgmonitor.org/factsheets_00.cfm?c=GRD'><img src='files/grenada.jpg' alt='image' width='200' border='0' align='left' /></a></td> <td align='left' valign='middle'><p><strong><font size='3'>Total Population (millions):</font> </strong>0.45</p><p><strong><font size'3'><a href='http://unstats.un.org/unsd/cdb/cdb_dict_xrxx.asp?def_code=63'>GDP</a> per capita (PPP US$):</font></strong> 8221 </p><p><font size='3'><strong>2006 <a href='http://hdr.undp.org/hdr2006/statistics/indices/default.cfm' target='_blank'>Human Development Index</a> (Rank 1-177):</strong> </font>85 </p></td> </tr> </table></td> </tr> <tr> <td align='left' valign='top'><font color='#003F7C' size='5'><strong>After Hurricane Ivan</strong></font></td> </tr> <tr> <td align='left' valign='top'><p><font color='#000000'>Up to 2003, Grenada was in a position to achieve the MDGs by 2015. But the country experienced considerable damage after Hurricane Ivan in 2004, significantly affecting its ability to meet all the targets. Today, Grenada is in need of substantial international development assistance.  Reports have called attention to the need to localize MDG indicators in order to respond to national issues. One of these is the need for a curriculum to meet the demand for education in technical subjects, agriculture, and the tourism industry.</font></p></td> </tr> <tr> <td align='left' valign='top'><a href='http://www.mdgmonitor.org/factsheets_00.cfm?c=GRD'>Read more... </a></td> </tr> <tr> <td align='right' valign='top'><p>Read related articles on <a href='http://news.google.com/archivesearch?hl=en&ned=us&q=grenada+and+%22millennium+development+goals%22&ie=UTF-8'>Google News</a></p></td> </tr> <tr> <td align='right' valign='top'>&nbsp;</td> </tr> <tr> <td align='center'><table border='0' cellpadding='0' cellspacing='0'> <tr> <td align='right' valign='middle'><a href='http://www.un.org/'><img src='files/un_logo_small.png' alt='UN logo' border='0' /></a></td> <td align='left' valign='middle'><font color='#666666'>The  <a href="http://www.un.org/millenniumgoals/" target="_blank">Millennium Development Goals </a>(MDGs) were laid out by the leaders of the world in 2000. They include  halving extreme poverty, halting the spread of HIV/AIDS and   providing universal primary education, all by 2015.</font></td> </tr> </table></td> </tr> </table>]]></description>
			<styleUrl>#text_photo_banner</styleUrl>
			<Point>
				<coordinates>-61.44416,12.040264,0</coordinates>
			</Point>
		</Placemark>
		<Placemark>
			<name>Guatemala</name>
			<visibility>0</visibility>
			<address>http://www.mdgmonitor.org/factsheets_00.cfm?c=GTM</address>
			<Snippet maxLines="2"></Snippet>
			<description><![CDATA[<table width='350' border='0' cellpadding='3' cellspacing='0' bgcolor='#FFFFFF'> <tr> <td align='left'><table border='0' cellspacing='0' cellpadding='0'> <tr> <td rowspan='2' align='left' valign='middle'><a href='http://www.mdgmonitor.org/'><img src='files/mdg_logo.png' alt='mdp logo' border='0' /></a></td> <td align='left' valign='bottom'><font color='#00486D' size='6'><b>MDG</b>MONITOR</td> </tr> <tr> <td align='right' valign='top'><font color='#00486D' size='4'>Track. Learn. Support.</font></td> </tr> </table></td> </tr> <tr> <td align='left' valign='top' bgcolor='#003F7C'><font color='#FFFFFF' size='5'><strong>Guatemala</strong></font></td> </tr> <tr> <td align='left' valign='top'><table border='0' cellspacing='0' cellpadding='0'> <tr> <td align='left' valign='top'><a href='http://www.mdgmonitor.org/factsheets_00.cfm?c=GTM'><img src='files/guatemala.jpg' alt='image' width='200' border='0' align='left' /></a></td> <td align='left' valign='middle'><p><strong><font size='3'>Total Population (millions):</font> </strong>12.6</p><p><strong><font size'3'><a href='http://unstats.un.org/unsd/cdb/cdb_dict_xrxx.asp?def_code=63'>GDP</a> per capita (PPP US$):</font></strong> 4468 </p><p><font size='3'><strong>2006 <a href='http://hdr.undp.org/hdr2006/statistics/indices/default.cfm' target='_blank'>Human Development Index</a> (Rank 1-177):</strong> </font>118 </p></td> </tr> </table></td> </tr> <tr> <td align='left' valign='top'><font color='#003F7C' size='5'><strong>Significant progress in education</strong></font></td> </tr> <tr> <td align='left' valign='top'><p><font color='#000000'>Over the last 15 years, Guatemala has made significant progress in providing education for young children at the primary-school level, which suggests that the country could fulfill its MDG targets in this area, as well as in the area of gender equality.  The Guatemala Rural Solidarity Programme, which seeks to tackle extreme poverty in 41 priority municipalities throughout Guatemala, is also an important step forward.  This programme contains a package of economic and social policies specifically tailored to local needs.</font></p></td> </tr> <tr> <td align='left' valign='top'><a href='http://www.mdgmonitor.org/factsheets_00.cfm?c=GTM'>Read more... </a></td> </tr> <tr> <td align='right' valign='top'><p>Read related articles on <a href='http://news.google.com/archivesearch?hl=en&ned=us&ie=UTF-8&q=guatemala+and+%22millennium+development+goals%22'>Google News</a></p></td> </tr> <tr> <td align='right' valign='top'>&nbsp;</td> </tr> <tr> <td align='center'><table border='0' cellpadding='0' cellspacing='0'> <tr> <td align='right' valign='middle'><a href='http://www.un.org/'><img src='files/un_logo_small.png' alt='UN logo' border='0' /></a></td> <td align='left' valign='middle'><font color='#666666'>The  <a href="http://www.un.org/millenniumgoals/" target="_blank">Millennium Development Goals </a>(MDGs) were laid out by the leaders of the world in 2000. They include  halving extreme poverty, halting the spread of HIV/AIDS and   providing universal primary education, all by 2015.</font></td> </tr> </table></td> </tr> </table>]]></description>
			<styleUrl>#text_photo_banner</styleUrl>
			<Point>
				<coordinates>-90.526252,14.609428,0</coordinates>
			</Point>
		</Placemark>
		<Placemark>
			<name>Guinea</name>
			<visibility>0</visibility>
			<address>http://www.mdgmonitor.org/factsheets_00.cfm?c=GIN</address>
			<Snippet maxLines="2"></Snippet>
			<description><![CDATA[<table width='350' border='0' cellpadding='3' cellspacing='0' bgcolor='#FFFFFF'> <tr> <td align='left'><table border='0' cellspacing='0' cellpadding='0'> <tr> <td rowspan='2' align='left' valign='middle'><a href='http://www.mdgmonitor.org/'><img src='files/mdg_logo.png' alt='mdp logo' border='0' /></a></td> <td align='left' valign='bottom'><font color='#00486D' size='6'><b>MDG</b>MONITOR</td> </tr> <tr> <td align='right' valign='top'><font color='#00486D' size='4'>Track. Learn. Support.</font></td> </tr> </table></td> </tr> <tr> <td align='left' valign='top' bgcolor='#003F7C'><font color='#FFFFFF' size='5'><strong>Guinea</strong></font></td> </tr> <tr> <td align='left' valign='top'><table border='0' cellspacing='0' cellpadding='0'> <tr> <td align='left' valign='top'><a href='http://www.mdgmonitor.org/factsheets_00.cfm?c=GIN'><img src='files/guinea.jpg' alt='image' width='200' border='0' align='left' /></a></td> <td align='left' valign='middle'><p><strong><font size='3'>Total Population (millions):</font> </strong>9.4</p><p><strong><font size'3'><a href='http://unstats.un.org/unsd/cdb/cdb_dict_xrxx.asp?def_code=63'>GDP</a> per capita (PPP US$):</font></strong> 2281 </p><p><font size='3'><strong>2006 <a href='http://hdr.undp.org/hdr2006/statistics/indices/default.cfm' target='_blank'>Human Development Index</a> (Rank 1-177):</strong> </font>160 </p></td> </tr> </table></td> </tr> <tr> <td align='left' valign='top'><font color='#003F7C' size='5'><strong>Extra financing needed</strong></font></td> </tr> <tr> <td align='left' valign='top'><p><font color='#000000'>Guinea has suffered from major armed conflicts, and finding ways to help the country recover is high on the international agenda. In 2005 consultations between the government, the United Nations country team, and other development countries culminated in the launching of a full-scale process for the strategic planning of the Millennium Development Goals (MDGs) in the context of Guinea. Nonetheless, because of slippages in economic policy and the political process, Guinea has experienced a drastic decline in external financing and its worst economic results in the course of the last 15 years, including a deepening of poverty, which increased from 49.2 percent in 2002 to 53.6 percent in 2005.</font></p></td> </tr> <tr> <td align='left' valign='top'><a href='http://www.mdgmonitor.org/factsheets_00.cfm?c=GIN'>Read more... </a></td> </tr> <tr> <td align='right' valign='top'><p>Read related articles on <a href='http://news.google.com/archivesearch?q=%22guinea%22%2C+conakry%2C+%22millennium+development+goals%22+&hl=en&ned=us&ie=UTF-8'>Google News</a></p></td> </tr> <tr> <td align='right' valign='top'>&nbsp;</td> </tr> <tr> <td align='center'><table border='0' cellpadding='0' cellspacing='0'> <tr> <td align='right' valign='middle'><a href='http://www.un.org/'><img src='files/un_logo_small.png' alt='UN logo' border='0' /></a></td> <td align='left' valign='middle'><font color='#666666'>The  <a href="http://www.un.org/millenniumgoals/" target="_blank">Millennium Development Goals </a>(MDGs) were laid out by the leaders of the world in 2000. They include  halving extreme poverty, halting the spread of HIV/AIDS and   providing universal primary education, all by 2015.</font></td> </tr> </table></td> </tr> </table>]]></description>
			<styleUrl>#text_photo_banner</styleUrl>
			<Point>
				<coordinates>-13.67797294,9.536263098999999,0</coordinates>
			</Point>
		</Placemark>
		<Placemark>
			<name>Guinea-Bissau</name>
			<visibility>0</visibility>
			<address>http://www.mdgmonitor.org/factsheets_00.cfm?c=GNB</address>
			<Snippet maxLines="2"></Snippet>
			<description><![CDATA[<table width='350' border='0' cellpadding='3' cellspacing='0' bgcolor='#FFFFFF'> <tr> <td align='left'><table border='0' cellspacing='0' cellpadding='0'> <tr> <td rowspan='2' align='left' valign='middle'><a href='http://www.mdgmonitor.org/'><img src='files/mdg_logo.png' alt='mdp logo' border='0' /></a></td> <td align='left' valign='bottom'><font color='#00486D' size='6'><b>MDG</b>MONITOR</td> </tr> <tr> <td align='right' valign='top'><font color='#00486D' size='4'>Track. Learn. Support.</font></td> </tr> </table></td> </tr> <tr> <td align='left' valign='top' bgcolor='#003F7C'><font color='#FFFFFF' size='5'><strong>Guinea-Bissau</strong></font></td> </tr> <tr> <td align='left' valign='top'><table border='0' cellspacing='0' cellpadding='0'> <tr> <td align='left' valign='top'><a href='http://www.mdgmonitor.org/factsheets_00.cfm?c=GNB'><img src='files/guineabissau.jpg' alt='image' width='200' border='0' align='left' /></a></td> <td align='left' valign='middle'><p><strong><font size='3'>Total Population (millions):</font> </strong>1.59</p><p><strong><font size'3'><a href='http://unstats.un.org/unsd/cdb/cdb_dict_xrxx.asp?def_code=63'>GDP</a> per capita (PPP US$):</font></strong> 731 </p><p><font size='3'><strong>2006 <a href='http://hdr.undp.org/hdr2006/statistics/indices/default.cfm' target='_blank'>Human Development Index</a> (Rank 1-177):</strong> </font>173 </p></td> </tr> </table></td> </tr> <tr> <td align='left' valign='top'><font color='#003F7C' size='5'><strong>Improvements delayed</strong></font></td> </tr> <tr> <td align='left' valign='top'><p><font color='#000000'>Guinea-Bissau is revising its targets in order to improve MDG achievement, which has been delayed.  Universal education has been slow to materialize, as was gender parity in education. The rate of infant mortality, under-five mortality, and the maternal mortality ratio have diminished, but not enough to meet the targets set for 2015. HIV/AIDS, malaria, and tuberculosis continue to spread. Provision of drinking water and sanitation, and access to decent housing are still lacking in many communities.</font></p></td> </tr> <tr> <td align='left' valign='top'><a href='http://www.mdgmonitor.org/factsheets_00.cfm?c=GNB'>Read more... </a></td> </tr> <tr> <td align='right' valign='top'><p>Read related articles on <a href='http://news.google.com/archivesearch?q=%22guinea-bissau%22+%2B+%22millennium+development+goals%22+&hl=en&ned=us&ie=UTF-8'>Google News</a></p></td> </tr> <tr> <td align='right' valign='top'>&nbsp;</td> </tr> <tr> <td align='center'><table border='0' cellpadding='0' cellspacing='0'> <tr> <td align='right' valign='middle'><a href='http://www.un.org/'><img src='files/un_logo_small.png' alt='UN logo' border='0' /></a></td> <td align='left' valign='middle'><font color='#666666'>The  <a href="http://www.un.org/millenniumgoals/" target="_blank">Millennium Development Goals </a>(MDGs) were laid out by the leaders of the world in 2000. They include  halving extreme poverty, halting the spread of HIV/AIDS and   providing universal primary education, all by 2015.</font></td> </tr> </table></td> </tr> </table>]]></description>
			<styleUrl>#text_photo_banner</styleUrl>
			<Point>
				<coordinates>-15.6,11.869999,0</coordinates>
			</Point>
		</Placemark>
		<Placemark>
			<name>Guyana</name>
			<visibility>0</visibility>
			<address>http://www.mdgmonitor.org/factsheets_00.cfm?c=GUY</address>
			<Snippet maxLines="2"></Snippet>
			<description><![CDATA[<table width='350' border='0' cellpadding='3' cellspacing='0' bgcolor='#FFFFFF'> <tr> <td align='left'><table border='0' cellspacing='0' cellpadding='0'> <tr> <td rowspan='2' align='left' valign='middle'><a href='http://www.mdgmonitor.org/'><img src='files/mdg_logo.png' alt='mdp logo' border='0' /></a></td> <td align='left' valign='bottom'><font color='#00486D' size='6'><b>MDG</b>MONITOR</td> </tr> <tr> <td align='right' valign='top'><font color='#00486D' size='4'>Track. Learn. Support.</font></td> </tr> </table></td> </tr> <tr> <td align='left' valign='top' bgcolor='#003F7C'><font color='#FFFFFF' size='5'><strong>Guyana</strong></font></td> </tr> <tr> <td align='left' valign='top'><table border='0' cellspacing='0' cellpadding='0'> <tr> <td align='left' valign='top'><a href='http://www.mdgmonitor.org/factsheets_00.cfm?c=GUY'><img src='files/guyana.jpg' alt='image' width='200' border='0' align='left' /></a></td> <td align='left' valign='middle'><p><strong><font size='3'>Total Population (millions):</font> </strong>0.75</p><p><strong><font size'3'><a href='http://unstats.un.org/unsd/cdb/cdb_dict_xrxx.asp?def_code=63'>GDP</a> per capita (PPP US$):</font></strong> 4518 </p><p><font size='3'><strong>2006 <a href='http://hdr.undp.org/hdr2006/statistics/indices/default.cfm' target='_blank'>Human Development Index</a> (Rank 1-177):</strong> </font>103 </p></td> </tr> </table></td> </tr> <tr> <td align='left' valign='top'><font color='#003F7C' size='5'><strong>Economic growth and political stability as major challenges</strong></font></td> </tr> <tr> <td align='left' valign='top'><p><font color='#000000'>The country’s achievements include: a reduction of the population suffering from hunger; increased access to social services and benefits; higher rates of primary school completion; and increased empowerment of women, including their representation in Parliament. However, Guyana also faces challenges. Economic growth has stagnated over the past five years, and security concerns and political tensions have created instability. The brain drain phenomenon has diminished national human resources and institutional capacities. The damage caused by the floods of 2005 and 2006 will require more than US$75 million to restore Guyana’s capacity to pre-disaster levels.</font></p></td> </tr> <tr> <td align='left' valign='top'><a href='http://www.mdgmonitor.org/factsheets_00.cfm?c=GUY'>Read more... </a></td> </tr> <tr> <td align='right' valign='top'><p>Read related articles on <a href='http://news.google.com/archivesearch?hl=en&ned=us&q=guyana+%22millennium+development+goals%22&ie=UTF-8'>Google News</a></p></td> </tr> <tr> <td align='right' valign='top'>&nbsp;</td> </tr> <tr> <td align='center'><table border='0' cellpadding='0' cellspacing='0'> <tr> <td align='right' valign='middle'><a href='http://www.un.org/'><img src='files/un_logo_small.png' alt='UN logo' border='0' /></a></td> <td align='left' valign='middle'><font color='#666666'>The  <a href="http://www.un.org/millenniumgoals/" target="_blank">Millennium Development Goals </a>(MDGs) were laid out by the leaders of the world in 2000. They include  halving extreme poverty, halting the spread of HIV/AIDS and   providing universal primary education, all by 2015.</font></td> </tr> </table></td> </tr> </table>]]></description>
			<styleUrl>#text_photo_banner</styleUrl>
			<Point>
				<coordinates>-58.159999,6.789999000000001,0</coordinates>
			</Point>
		</Placemark>
		<Placemark>
			<name>Haiti</name>
			<visibility>0</visibility>
			<address>http://www.mdgmonitor.org/factsheets_00.cfm?c=HTI</address>
			<Snippet maxLines="2"></Snippet>
			<description><![CDATA[<table width='350' border='0' cellpadding='3' cellspacing='0' bgcolor='#FFFFFF'> <tr> <td align='left'><table border='0' cellspacing='0' cellpadding='0'> <tr> <td rowspan='2' align='left' valign='middle'><a href='http://www.mdgmonitor.org/'><img src='files/mdg_logo.png' alt='mdp logo' border='0' /></a></td> <td align='left' valign='bottom'><font color='#00486D' size='6'><b>MDG</b>MONITOR</td> </tr> <tr> <td align='right' valign='top'><font color='#00486D' size='4'>Track. Learn. Support.</font></td> </tr> </table></td> </tr> <tr> <td align='left' valign='top' bgcolor='#003F7C'><font color='#FFFFFF' size='5'><strong>Haiti</strong></font></td> </tr> <tr> <td align='left' valign='top'><table border='0' cellspacing='0' cellpadding='0'> <tr> <td align='left' valign='top'><a href='http://www.mdgmonitor.org/factsheets_00.cfm?c=HTI'><img src='files/haiti.jpg' alt='image' width='200' border='0' align='left' /></a></td> <td align='left' valign='middle'><p><strong><font size='3'>Total Population (millions):</font> </strong>8.53</p><p><strong><font size'3'><a href='http://unstats.un.org/unsd/cdb/cdb_dict_xrxx.asp?def_code=63'>GDP</a> per capita (PPP US$):</font></strong> 1836 </p><p><font size='3'><strong>2006 <a href='http://hdr.undp.org/hdr2006/statistics/indices/default.cfm' target='_blank'>Human Development Index</a> (Rank 1-177):</strong> </font>154 </p></td> </tr> </table></td> </tr> <tr> <td align='left' valign='top'><font color='#003F7C' size='5'><strong>Providing access to basic social services</strong></font></td> </tr> <tr> <td align='left' valign='top'><p><font color='#000000'>Between 2004 and 2006 the government, in cooperation with UNDP, launched a campaign to achieve the MDGs. This initiative enabled the media to focus on the MDGs, resulting in numerous radio broadcasts and newspaper articles.  As a result of the awareness raised in this campaign, the challenges involved in achieving the MDGs were identified, including the difficult, sporadic and costly access to services, and the lack of consistency between established priorities and budgetary choices.</font></p></td> </tr> <tr> <td align='left' valign='top'><a href='http://www.mdgmonitor.org/factsheets_00.cfm?c=HTI'>Read more... </a></td> </tr> <tr> <td align='right' valign='top'><p>Read related articles on <a href='http://news.google.com/archivesearch?hl=en&ned=us&ie=UTF-8&q=haiti+%22millennium+development+goals%22'>Google News</a></p></td> </tr> <tr> <td align='right' valign='top'>&nbsp;</td> </tr> <tr> <td align='center'><table border='0' cellpadding='0' cellspacing='0'> <tr> <td align='right' valign='middle'><a href='http://www.un.org/'><img src='files/un_logo_small.png' alt='UN logo' border='0' /></a></td> <td align='left' valign='middle'><font color='#666666'>The  <a href="http://www.un.org/millenniumgoals/" target="_blank">Millennium Development Goals </a>(MDGs) were laid out by the leaders of the world in 2000. They include  halving extreme poverty, halting the spread of HIV/AIDS and   providing universal primary education, all by 2015.</font></td> </tr> </table></td> </tr> </table>]]></description>
			<styleUrl>#text_photo_banner</styleUrl>
			<Point>
				<coordinates>-72.339996,18.54,0</coordinates>
			</Point>
		</Placemark>
		<Placemark>
			<name>Honduras</name>
			<visibility>0</visibility>
			<address>http://www.mdgmonitor.org/factsheets_00.cfm?c=HND</address>
			<Snippet maxLines="2"></Snippet>
			<description><![CDATA[<table width='350' border='0' cellpadding='3' cellspacing='0' bgcolor='#FFFFFF'> <tr> <td align='left'><table border='0' cellspacing='0' cellpadding='0'> <tr> <td rowspan='2' align='left' valign='middle'><a href='http://www.mdgmonitor.org/'><img src='files/mdg_logo.png' alt='mdp logo' border='0' /></a></td> <td align='left' valign='bottom'><font color='#00486D' size='6'><b>MDG</b>MONITOR</td> </tr> <tr> <td align='right' valign='top'><font color='#00486D' size='4'>Track. Learn. Support.</font></td> </tr> </table></td> </tr> <tr> <td align='left' valign='top' bgcolor='#003F7C'><font color='#FFFFFF' size='5'><strong>Honduras</strong></font></td> </tr> <tr> <td align='left' valign='top'><table border='0' cellspacing='0' cellpadding='0'> <tr> <td align='left' valign='top'><a href='http://www.mdgmonitor.org/factsheets_00.cfm?c=HND'><img src='files/honduras.jpg' alt='image' width='200' border='0' align='left' /></a></td> <td align='left' valign='middle'><p><strong><font size='3'>Total Population (millions):</font> </strong>7.2</p><p><strong><font size'3'><a href='http://unstats.un.org/unsd/cdb/cdb_dict_xrxx.asp?def_code=63'>GDP</a> per capita (PPP US$):</font></strong> 2789 </p><p><font size='3'><strong>2006 <a href='http://hdr.undp.org/hdr2006/statistics/indices/default.cfm' target='_blank'>Human Development Index</a> (Rank 1-177):</strong> </font>117 </p></td> </tr> </table></td> </tr> <tr> <td align='left' valign='top'><font color='#003F7C' size='5'><strong>Poverty still an important issue</strong></font></td> </tr> <tr> <td align='left' valign='top'><p><font color='#000000'>Honduras achieved much progress between 1990 to 2005, reducing the number of individuals who live on less than a dollar a day, and decreasing the rates of infant malnutrition, youth illiteracy, and the prevalence of malaria and other diseases. During that same time period however, other challenges emerged. Poverty is still a serious problem, affecting more than 60 percent of the Honduran population, and the net primary education enrollment ratio is still low. As a result, the Government and other agencies have designed policy measures to overcome these challenges.</font></p></td> </tr> <tr> <td align='left' valign='top'><a href='http://www.mdgmonitor.org/factsheets_00.cfm?c=HND'>Read more... </a></td> </tr> <tr> <td align='right' valign='top'><p>Read related articles on <a href='http://news.google.com/archivesearch?hl=en&ned=us&ie=UTF-8&q=honduras+%22millennium+development+goals%22'>Google News</a></p></td> </tr> <tr> <td align='right' valign='top'>&nbsp;</td> </tr> <tr> <td align='center'><table border='0' cellpadding='0' cellspacing='0'> <tr> <td align='right' valign='middle'><a href='http://www.un.org/'><img src='files/un_logo_small.png' alt='UN logo' border='0' /></a></td> <td align='left' valign='middle'><font color='#666666'>The  <a href="http://www.un.org/millenniumgoals/" target="_blank">Millennium Development Goals </a>(MDGs) were laid out by the leaders of the world in 2000. They include  halving extreme poverty, halting the spread of HIV/AIDS and   providing universal primary education, all by 2015.</font></td> </tr> </table></td> </tr> </table>]]></description>
			<styleUrl>#text_photo_banner</styleUrl>
			<Point>
				<coordinates>-87.220001,14.09,0</coordinates>
			</Point>
		</Placemark>
		<Placemark>
			<name>Hungary</name>
			<visibility>0</visibility>
			<address>http://www.mdgmonitor.org/factsheets_00.cfm?c=HUN</address>
			<Snippet maxLines="2"></Snippet>
			<description><![CDATA[<table width='350' border='0' cellpadding='3' cellspacing='0' bgcolor='#FFFFFF'> <tr> <td align='left'><table border='0' cellspacing='0' cellpadding='0'> <tr> <td rowspan='2' align='left' valign='middle'><a href='http://www.mdgmonitor.org/'><img src='files/mdg_logo.png' alt='mdp logo' border='0' /></a></td> <td align='left' valign='bottom'><font color='#00486D' size='6'><b>MDG</b>MONITOR</td> </tr> <tr> <td align='right' valign='top'><font color='#00486D' size='4'>Track. Learn. Support.</font></td> </tr> </table></td> </tr> <tr> <td align='left' valign='top' bgcolor='#003F7C'><font color='#FFFFFF' size='5'><strong>Hungary</strong></font></td> </tr> <tr> <td align='left' valign='top'><table border='0' cellspacing='0' cellpadding='0'> <tr> <td align='left' valign='top'><a href='http://www.mdgmonitor.org/factsheets_00.cfm?c=HUN'><img src='files/budapest.jpg' alt='image' width='200' border='0' align='left' /></a></td> <td align='left' valign='middle'><p><strong><font size='3'>Total Population (millions):</font> </strong>10.1</p><p><strong><font size'3'><a href='http://unstats.un.org/unsd/cdb/cdb_dict_xrxx.asp?def_code=63'>GDP</a> per capita (PPP US$):</font></strong> 18086 </p><p><font size='3'><strong>2006 <a href='http://hdr.undp.org/hdr2006/statistics/indices/default.cfm' target='_blank'>Human Development Index</a> (Rank 1-177):</strong> </font>35 </p></td> </tr> </table></td> </tr> <tr> <td align='left' valign='top'><font color='#003F7C' size='5'><strong>An EU Member State on track</strong></font></td> </tr> <tr> <td align='left' valign='top'><p><font color='#000000'>Hungary, a member State of the European Union, is well on track to meet most of the MDGs. New targets for Goal Nos. 1-7 will make it possible to achieve further progress both among vulnerable population groups and in priority geographical areas. With 0.11% of its gross national income devoted to providing Overseas Development Assistance in 2005, Hungary is on track to meet the European Union target set for the new member States at 0.17% of gross national income in 2010.</font></p></td> </tr> <tr> <td align='left' valign='top'><a href='http://www.mdgmonitor.org/factsheets_00.cfm?c=HUN'>Read more... </a></td> </tr> <tr> <td align='right' valign='top'><p>Read related articles on <a href='http://news.google.com/archivesearch?q=hungary+and+%22millennium+development+goals%22&hl=en&ned=us&ie=UTF-8'>Google News</a></p></td> </tr> <tr> <td align='right' valign='top'>&nbsp;</td> </tr> <tr> <td align='center'><table border='0' cellpadding='0' cellspacing='0'> <tr> <td align='right' valign='middle'><a href='http://www.un.org/'><img src='files/un_logo_small.png' alt='UN logo' border='0' /></a></td> <td align='left' valign='middle'><font color='#666666'>The  <a href="http://www.un.org/millenniumgoals/" target="_blank">Millennium Development Goals </a>(MDGs) were laid out by the leaders of the world in 2000. They include  halving extreme poverty, halting the spread of HIV/AIDS and   providing universal primary education, all by 2015.</font></td> </tr> </table></td> </tr> </table>]]></description>
			<styleUrl>#text_photo_banner</styleUrl>
			<Point>
				<coordinates>19.046746,47.50703,0</coordinates>
			</Point>
		</Placemark>
		<Placemark>
			<name>India</name>
			<visibility>0</visibility>
			<address>http://www.mdgmonitor.org/factsheets_00.cfm?c=IND</address>
			<Snippet maxLines="2"></Snippet>
			<description><![CDATA[<table width='350' border='0' cellpadding='3' cellspacing='0' bgcolor='#FFFFFF'> <tr> <td align='left'><table border='0' cellspacing='0' cellpadding='0'> <tr> <td rowspan='2' align='left' valign='middle'><a href='http://www.mdgmonitor.org/'><img src='files/mdg_logo.png' alt='mdp logo' border='0' /></a></td> <td align='left' valign='bottom'><font color='#00486D' size='6'><b>MDG</b>MONITOR</td> </tr> <tr> <td align='right' valign='top'><font color='#00486D' size='4'>Track. Learn. Support.</font></td> </tr> </table></td> </tr> <tr> <td align='left' valign='top' bgcolor='#003F7C'><font color='#FFFFFF' size='5'><strong>India</strong></font></td> </tr> <tr> <td align='left' valign='top'><table border='0' cellspacing='0' cellpadding='0'> <tr> <td align='left' valign='top'><a href='http://www.mdgmonitor.org/factsheets_00.cfm?c=IND'><img src='files/india.jpg' alt='image' width='200' border='0' align='left' /></a></td> <td align='left' valign='middle'><p><strong><font size='3'>Total Population (millions):</font> </strong>1103.37</p><p><strong><font size'3'><a href='http://unstats.un.org/unsd/cdb/cdb_dict_xrxx.asp?def_code=63'>GDP</a> per capita (PPP US$):</font></strong> 3486 </p><p><font size='3'><strong>2006 <a href='http://hdr.undp.org/hdr2006/statistics/indices/default.cfm' target='_blank'>Human Development Index</a> (Rank 1-177):</strong> </font>126 </p></td> </tr> </table></td> </tr> <tr> <td align='left' valign='top'><font color='#003F7C' size='5'><strong>Service delivery and capacity building</strong></font></td> </tr> <tr> <td align='left' valign='top'><p><font color='#000000'>India’s most impressive achievement in the field of poverty reduction includes the National Rural Employment Guarantee Scheme, with an annual allocation of $2.5 billion, which guarantees 100 days of work for every household. In addition, the Jawaharlal Nehru National Urban Renewal Mission has allocated $7 billion over a seven-year period to provide basic services to the urban poor in 63 major cities. A major task ahead for India is the improvement of service delivery and capacity development. Social, economic, and political inclusion; decreasing the incidence of violence; and reducing regional disparities require concerted efforts to promote greater access of vulnerable groups to basic services.</font></p></td> </tr> <tr> <td align='left' valign='top'><a href='http://www.mdgmonitor.org/factsheets_00.cfm?c=IND'>Read more... </a></td> </tr> <tr> <td align='right' valign='top'><p>Read related articles on <a href='http://news.google.com/archivesearch?hl=en&ned=us&ie=UTF-8&q=india+%22millennium+development+goals%22'>Google News</a></p></td> </tr> <tr> <td align='right' valign='top'>&nbsp;</td> </tr> <tr> <td align='center'><table border='0' cellpadding='0' cellspacing='0'> <tr> <td align='right' valign='middle'><a href='http://www.un.org/'><img src='files/un_logo_small.png' alt='UN logo' border='0' /></a></td> <td align='left' valign='middle'><font color='#666666'>The  <a href="http://www.un.org/millenniumgoals/" target="_blank">Millennium Development Goals </a>(MDGs) were laid out by the leaders of the world in 2000. They include  halving extreme poverty, halting the spread of HIV/AIDS and   providing universal primary education, all by 2015.</font></td> </tr> </table></td> </tr> </table>]]></description>
			<styleUrl>#text_photo_banner</styleUrl>
			<Point>
				<coordinates>77.21650322000001,28.63459112,0</coordinates>
			</Point>
		</Placemark>
		<Placemark>
			<name>Indonesia</name>
			<visibility>0</visibility>
			<address>http://www.mdgmonitor.org/factsheets_00.cfm?c=IDN</address>
			<Snippet maxLines="2"></Snippet>
			<description><![CDATA[<table width='350' border='0' cellpadding='3' cellspacing='0' bgcolor='#FFFFFF'> <tr> <td align='left'><table border='0' cellspacing='0' cellpadding='0'> <tr> <td rowspan='2' align='left' valign='middle'><a href='http://www.mdgmonitor.org/'><img src='files/mdg_logo.png' alt='mdp logo' border='0' /></a></td> <td align='left' valign='bottom'><font color='#00486D' size='6'><b>MDG</b>MONITOR</td> </tr> <tr> <td align='right' valign='top'><font color='#00486D' size='4'>Track. Learn. Support.</font></td> </tr> </table></td> </tr> <tr> <td align='left' valign='top' bgcolor='#003F7C'><font color='#FFFFFF' size='5'><strong>Indonesia</strong></font></td> </tr> <tr> <td align='left' valign='top'><table border='0' cellspacing='0' cellpadding='0'> <tr> <td align='left' valign='top'><a href='http://www.mdgmonitor.org/factsheets_00.cfm?c=IDN'><img src='files/indonesia.jpg' alt='image' width='200' border='0' align='left' /></a></td> <td align='left' valign='middle'><p><strong><font size='3'>Total Population (millions):</font> </strong>222.78</p><p><strong><font size'3'><a href='http://unstats.un.org/unsd/cdb/cdb_dict_xrxx.asp?def_code=63'>GDP</a> per capita (PPP US$):</font></strong> 3842 </p><p><font size='3'><strong>2006 <a href='http://hdr.undp.org/hdr2006/statistics/indices/default.cfm' target='_blank'>Human Development Index</a> (Rank 1-177):</strong> </font>108 </p></td> </tr> </table></td> </tr> <tr> <td align='left' valign='top'><font color='#003F7C' size='5'><strong>A mixed picture</strong></font></td> </tr> <tr> <td align='left' valign='top'><p><font color='#000000'>Since the economic crisis and political transformation of 1997-1998, the MDG picture has been mixed for Indonesia. Nearly 18 percent of the population lives below the national poverty line. More than half the poor do not have access to safe water, and about 44 percent do not have adequate sanitation. Maternal mortality rates have dropped slightly, but are still among the highest in Southeast Asia. The government is committed to increasing funding for poverty alleviation, education and health. For example, it recently launched a programme which seeks to create short-term employment and improve rural infrastructure.</font></p></td> </tr> <tr> <td align='left' valign='top'><a href='http://www.mdgmonitor.org/factsheets_00.cfm?c=IDN'>Read more... </a></td> </tr> <tr> <td align='right' valign='top'><p>Read related articles on <a href='http://news.google.com/archivesearch?hl=en&ned=us&ie=UTF-8&q=indonesia+%22millennium+development+goals%22'>Google News</a></p></td> </tr> <tr> <td align='right' valign='top'>&nbsp;</td> </tr> <tr> <td align='center'><table border='0' cellpadding='0' cellspacing='0'> <tr> <td align='right' valign='middle'><a href='http://www.un.org/'><img src='files/un_logo_small.png' alt='UN logo' border='0' /></a></td> <td align='left' valign='middle'><font color='#666666'>The  <a href="http://www.un.org/millenniumgoals/" target="_blank">Millennium Development Goals </a>(MDGs) were laid out by the leaders of the world in 2000. They include  halving extreme poverty, halting the spread of HIV/AIDS and   providing universal primary education, all by 2015.</font></td> </tr> </table></td> </tr> </table>]]></description>
			<styleUrl>#text_photo_banner</styleUrl>
			<Point>
				<coordinates>106.830001,-6.179999,0</coordinates>
			</Point>
		</Placemark>
		<Placemark>
			<name>Iran, Islamic Rep of</name>
			<visibility>0</visibility>
			<address>http://www.mdgmonitor.org/factsheets_00.cfm?c=IRN</address>
			<Snippet maxLines="2"></Snippet>
			<description><![CDATA[<table width='350' border='0' cellpadding='3' cellspacing='0' bgcolor='#FFFFFF'> <tr> <td align='left'><table border='0' cellspacing='0' cellpadding='0'> <tr> <td rowspan='2' align='left' valign='middle'><a href='http://www.mdgmonitor.org/'><img src='files/mdg_logo.png' alt='mdp logo' border='0' /></a></td> <td align='left' valign='bottom'><font color='#00486D' size='6'><b>MDG</b>MONITOR</td> </tr> <tr> <td align='right' valign='top'><font color='#00486D' size='4'>Track. Learn. Support.</font></td> </tr> </table></td> </tr> <tr> <td align='left' valign='top' bgcolor='#003F7C'><font color='#FFFFFF' size='5'><strong>Iran, Islamic Rep of</strong></font></td> </tr> <tr> <td align='left' valign='top'><table border='0' cellspacing='0' cellpadding='0'> <tr> <td align='left' valign='top'><a href='http://www.mdgmonitor.org/factsheets_00.cfm?c=IRN'><img src='files/iran.jpg' alt='image' width='200' border='0' align='left' /></a></td> <td align='left' valign='middle'><p><strong><font size='3'>Total Population (millions):</font> </strong>69.52</p><p><strong><font size'3'><a href='http://unstats.un.org/unsd/cdb/cdb_dict_xrxx.asp?def_code=63'>GDP</a> per capita (PPP US$):</font></strong> 7979 </p><p><font size='3'><strong>2006 <a href='http://hdr.undp.org/hdr2006/statistics/indices/default.cfm' target='_blank'>Human Development Index</a> (Rank 1-177):</strong> </font>96 </p></td> </tr> </table></td> </tr> <tr> <td align='left' valign='top'><font color='#003F7C' size='5'><strong>Improvements in most of the MDGs</strong></font></td> </tr> <tr> <td align='left' valign='top'><p><font color='#000000'>In Iran, most of the indicators relating to poverty, education, gender (except the number of seats held by women in parliament), child mortality, maternal mortality, HIV/AIDS, the environment have continued to improve. Based on food-calorie intake measurements, poverty now represents 7 percent of the population.</font></p></td> </tr> <tr> <td align='left' valign='top'><a href='http://www.mdgmonitor.org/factsheets_00.cfm?c=IRN'>Read more... </a></td> </tr> <tr> <td align='right' valign='top'><p>Read related articles on <a href='http://news.google.com/archivesearch?hl=en&ned=us&ie=UTF-8&q=iran+%22millennium+development+goals%22'>Google News</a></p></td> </tr> <tr> <td align='right' valign='top'>&nbsp;</td> </tr> <tr> <td align='center'><table border='0' cellpadding='0' cellspacing='0'> <tr> <td align='right' valign='middle'><a href='http://www.un.org/'><img src='files/un_logo_small.png' alt='UN logo' border='0' /></a></td> <td align='left' valign='middle'><font color='#666666'>The  <a href="http://www.un.org/millenniumgoals/" target="_blank">Millennium Development Goals </a>(MDGs) were laid out by the leaders of the world in 2000. They include  halving extreme poverty, halting the spread of HIV/AIDS and   providing universal primary education, all by 2015.</font></td> </tr> </table></td> </tr> </table>]]></description>
			<styleUrl>#text_photo_banner</styleUrl>
			<Point>
				<coordinates>51.43,35.669998,0</coordinates>
			</Point>
		</Placemark>
		<Placemark>
			<name>Iraq</name>
			<visibility>0</visibility>
			<address>http://www.mdgmonitor.org/factsheets_00.cfm?c=IRQ</address>
			<Snippet maxLines="2"></Snippet>
			<description><![CDATA[<table width='350' border='0' cellpadding='3' cellspacing='0' bgcolor='#FFFFFF'> <tr> <td align='left'><table border='0' cellspacing='0' cellpadding='0'> <tr> <td rowspan='2' align='left' valign='middle'><a href='http://www.mdgmonitor.org/'><img src='files/mdg_logo.png' alt='mdp logo' border='0' /></a></td> <td align='left' valign='bottom'><font color='#00486D' size='6'><b>MDG</b>MONITOR</td> </tr> <tr> <td align='right' valign='top'><font color='#00486D' size='4'>Track. Learn. Support.</font></td> </tr> </table></td> </tr> <tr> <td align='left' valign='top' bgcolor='#003F7C'><font color='#FFFFFF' size='5'><strong>Iraq</strong></font></td> </tr> <tr> <td align='left' valign='top'><table border='0' cellspacing='0' cellpadding='0'> <tr> <td align='left' valign='top'><a href='http://www.mdgmonitor.org/factsheets_00.cfm?c=IRQ'><img src='files/iraq.jpg' alt='image' width='200' border='0' align='left' /></a></td> <td align='left' valign='middle'><p><strong><font size='3'>Total Population (millions):</font> </strong>28.81</p><p><strong><font size'3'><a href='http://unstats.un.org/unsd/cdb/cdb_dict_xrxx.asp?def_code=63'>GDP</a> per capita (PPP US$):</font></strong> NA </p><p><font size='3'><strong>2006 <a href='http://hdr.undp.org/hdr2006/statistics/indices/default.cfm' target='_blank'>Human Development Index</a> (Rank 1-177):</strong> </font>NA </p></td> </tr> </table></td> </tr> <tr> <td align='left' valign='top'><font color='#003F7C' size='5'><strong>Wars and sanctions</strong></font></td> </tr> <tr> <td align='left' valign='top'><p><font color='#000000'>Iraq has low human development indicators as a result of many long wars and sanctions imposed on the country from 1990 to 2003.  After 2003, efforts focused on the reconstruction and regeneration of the Iraqi economy and social well-being. Successive governments developed a National Development Strategy, of which one of the main pillars is to achieve the MDGs and improve the quality of life. The focus is on achieving economic growth, human resources development, improving the infrastructure and expanding social protection coverage.</font></p></td> </tr> <tr> <td align='left' valign='top'><a href='http://www.mdgmonitor.org/factsheets_00.cfm?c=IRQ'>Read more... </a></td> </tr> <tr> <td align='right' valign='top'><p>Read related articles on <a href='http://news.google.com/archivesearch?hl=en&ned=us&ie=UTF-8&q=iraq+%22millennium+development+goals%22'>Google News</a></p></td> </tr> <tr> <td align='right' valign='top'>&nbsp;</td> </tr> <tr> <td align='center'><table border='0' cellpadding='0' cellspacing='0'> <tr> <td align='right' valign='middle'><a href='http://www.un.org/'><img src='files/un_logo_small.png' alt='UN logo' border='0' /></a></td> <td align='left' valign='middle'><font color='#666666'>The  <a href="http://www.un.org/millenniumgoals/" target="_blank">Millennium Development Goals </a>(MDGs) were laid out by the leaders of the world in 2000. They include  halving extreme poverty, halting the spread of HIV/AIDS and   providing universal primary education, all by 2015.</font></td> </tr> </table></td> </tr> </table>]]></description>
			<styleUrl>#text_photo_banner</styleUrl>
			<Point>
				<coordinates>44.39853852,33.30190034,0</coordinates>
			</Point>
		</Placemark>
		<Placemark>
			<name>Jordan</name>
			<visibility>0</visibility>
			<address>http://www.mdgmonitor.org/factsheets_00.cfm?c=JOR</address>
			<Snippet maxLines="2"></Snippet>
			<description><![CDATA[<table width='350' border='0' cellpadding='3' cellspacing='0' bgcolor='#FFFFFF'> <tr> <td align='left'><table border='0' cellspacing='0' cellpadding='0'> <tr> <td rowspan='2' align='left' valign='middle'><a href='http://www.mdgmonitor.org/'><img src='files/mdg_logo.png' alt='mdp logo' border='0' /></a></td> <td align='left' valign='bottom'><font color='#00486D' size='6'><b>MDG</b>MONITOR</td> </tr> <tr> <td align='right' valign='top'><font color='#00486D' size='4'>Track. Learn. Support.</font></td> </tr> </table></td> </tr> <tr> <td align='left' valign='top' bgcolor='#003F7C'><font color='#FFFFFF' size='5'><strong>Jordan</strong></font></td> </tr> <tr> <td align='left' valign='top'><table border='0' cellspacing='0' cellpadding='0'> <tr> <td align='left' valign='top'><a href='http://www.mdgmonitor.org/factsheets_00.cfm?c=JOR'><img src='files/jordan.jpg' alt='image' width='200' border='0' align='left' /></a></td> <td align='left' valign='middle'><p><strong><font size='3'>Total Population (millions):</font> </strong>5.7</p><p><strong><font size'3'><a href='http://unstats.un.org/unsd/cdb/cdb_dict_xrxx.asp?def_code=63'>GDP</a> per capita (PPP US$):</font></strong> 5126 </p><p><font size='3'><strong>2006 <a href='http://hdr.undp.org/hdr2006/statistics/indices/default.cfm' target='_blank'>Human Development Index</a> (Rank 1-177):</strong> </font>86 </p></td> </tr> </table></td> </tr> <tr> <td align='left' valign='top'><font color='#003F7C' size='5'><strong>Expanding social protection</strong></font></td> </tr> <tr> <td align='left' valign='top'><p><font color='#000000'>Jordan’s achievements include access to education and basic infrastructure. Shortfalls include the quality of public education, access to sewerage, efficiency in water distribution and water sources. Jordan is striving to expand social protection to the unemployed and those working in marginalized industries. In addition, gender equality is now high on the agenda, such as increasing the women’s quota in electoral bodies.</font></p></td> </tr> <tr> <td align='left' valign='top'><a href='http://www.mdgmonitor.org/factsheets_00.cfm?c=JOR'>Read more... </a></td> </tr> <tr> <td align='right' valign='top'><p>Read related articles on <a href='http://news.google.com/archivesearch?hl=en&ned=us&ie=UTF-8&q=jordan+%22millennium+development+goals%22'>Google News</a></p></td> </tr> <tr> <td align='right' valign='top'>&nbsp;</td> </tr> <tr> <td align='center'><table border='0' cellpadding='0' cellspacing='0'> <tr> <td align='right' valign='middle'><a href='http://www.un.org/'><img src='files/un_logo_small.png' alt='UN logo' border='0' /></a></td> <td align='left' valign='middle'><font color='#666666'>The  <a href="http://www.un.org/millenniumgoals/" target="_blank">Millennium Development Goals </a>(MDGs) were laid out by the leaders of the world in 2000. They include  halving extreme poverty, halting the spread of HIV/AIDS and   providing universal primary education, all by 2015.</font></td> </tr> </table></td> </tr> </table>]]></description>
			<styleUrl>#text_photo_banner</styleUrl>
			<Point>
				<coordinates>35.93,31.95,0</coordinates>
			</Point>
		</Placemark>
		<Placemark>
			<name>Kazakhstan</name>
			<visibility>0</visibility>
			<address>http://www.mdgmonitor.org/factsheets_00.cfm?c=KAZ</address>
			<Snippet maxLines="2"></Snippet>
			<description><![CDATA[<table width='350' border='0' cellpadding='3' cellspacing='0' bgcolor='#FFFFFF'> <tr> <td align='left'><table border='0' cellspacing='0' cellpadding='0'> <tr> <td rowspan='2' align='left' valign='middle'><a href='http://www.mdgmonitor.org/'><img src='files/mdg_logo.png' alt='mdp logo' border='0' /></a></td> <td align='left' valign='bottom'><font color='#00486D' size='6'><b>MDG</b>MONITOR</td> </tr> <tr> <td align='right' valign='top'><font color='#00486D' size='4'>Track. Learn. Support.</font></td> </tr> </table></td> </tr> <tr> <td align='left' valign='top' bgcolor='#003F7C'><font color='#FFFFFF' size='5'><strong>Kazakhstan</strong></font></td> </tr> <tr> <td align='left' valign='top'><table border='0' cellspacing='0' cellpadding='0'> <tr> <td align='left' valign='top'><a href='http://www.mdgmonitor.org/factsheets_00.cfm?c=KAZ'><img src='files/kazakhstan.jpg' alt='image' width='200' border='0' align='left' /></a></td> <td align='left' valign='middle'><p><strong><font size='3'>Total Population (millions):</font> </strong>14.83</p><p><strong><font size'3'><a href='http://unstats.un.org/unsd/cdb/cdb_dict_xrxx.asp?def_code=63'>GDP</a> per capita (PPP US$):</font></strong> 8515 </p><p><font size='3'><strong>2006 <a href='http://hdr.undp.org/hdr2006/statistics/indices/default.cfm' target='_blank'>Human Development Index</a> (Rank 1-177):</strong> </font>79 </p></td> </tr> </table></td> </tr> <tr> <td align='left' valign='top'><font color='#003F7C' size='5'><strong>Impressive progress</strong></font></td> </tr> <tr> <td align='left' valign='top'><p><font color='#000000'>Kazakhstan has already achieved a number of MDGs and demonstrates impressive progress on others, such as poverty reduction, access to education, and the promotion of women’s rights. Eleven programmes dealing with various dimensions of poverty have contributed to a reduction of poverty from 34.6 percent in 1996 to 16.1 percent in 2004. Greater challenges lie in the areas of health care, education and environmental sustainability.</font></p></td> </tr> <tr> <td align='left' valign='top'><a href='http://www.mdgmonitor.org/factsheets_00.cfm?c=KAZ'>Read more... </a></td> </tr> <tr> <td align='right' valign='top'><p>Read related articles on <a href='http://news.google.com/archivesearch?hl=en&ned=us&ie=UTF-8&q=kazakhstan+%22millennium+development+goals%22'>Google News</a></p></td> </tr> <tr> <td align='right' valign='top'>&nbsp;</td> </tr> <tr> <td align='center'><table border='0' cellpadding='0' cellspacing='0'> <tr> <td align='right' valign='middle'><a href='http://www.un.org/'><img src='files/un_logo_small.png' alt='UN logo' border='0' /></a></td> <td align='left' valign='middle'><font color='#666666'>The  <a href="http://www.un.org/millenniumgoals/" target="_blank">Millennium Development Goals </a>(MDGs) were laid out by the leaders of the world in 2000. They include  halving extreme poverty, halting the spread of HIV/AIDS and   providing universal primary education, all by 2015.</font></td> </tr> </table></td> </tr> </table>]]></description>
			<styleUrl>#text_photo_banner</styleUrl>
			<Point>
				<coordinates>71.446609,51.179846,0</coordinates>
			</Point>
		</Placemark>
		<Placemark>
			<name>Kosovo, UN administered province of, (Serbia)</name>
			<visibility>0</visibility>
			<address>http://www.mdgmonitor.org/factsheets_00.cfm?c=KOS</address>
			<Snippet maxLines="2"></Snippet>
			<description><![CDATA[<table width='350' border='0' cellpadding='3' cellspacing='0' bgcolor='#FFFFFF'> <tr> <td align='left'><table border='0' cellspacing='0' cellpadding='0'> <tr> <td rowspan='2' align='left' valign='middle'><a href='http://www.mdgmonitor.org/'><img src='files/mdg_logo.png' alt='mdp logo' border='0' /></a></td> <td align='left' valign='bottom'><font color='#00486D' size='6'><b>MDG</b>MONITOR</td> </tr> <tr> <td align='right' valign='top'><font color='#00486D' size='4'>Track. Learn. Support.</font></td> </tr> </table></td> </tr> <tr> <td align='left' valign='top' bgcolor='#003F7C'><font color='#FFFFFF' size='5'><strong>Kosovo, UN administered province of, (Serbia)</strong></font></td> </tr> <tr> <td align='left' valign='top'><table border='0' cellspacing='0' cellpadding='0'> <tr> <td align='left' valign='top'><a href='http://www.mdgmonitor.org/factsheets_00.cfm?c=KOS'><img src='files/kosovo.jpg' alt='image' width='200' border='0' align='left' /></a></td> <td align='left' valign='middle'><p><strong><font size='3'>Total Population (millions):</font> </strong>NA</p><p><strong><font size'3'><a href='http://unstats.un.org/unsd/cdb/cdb_dict_xrxx.asp?def_code=63'>GDP</a> per capita (PPP US$):</font></strong> NA </p><p><font size='3'><strong>2006 <a href='http://hdr.undp.org/hdr2006/statistics/indices/default.cfm' target='_blank'>Human Development Index</a> (Rank 1-177):</strong> </font>NA </p></td> </tr> </table></td> </tr> <tr> <td align='left' valign='top'><font color='#003F7C' size='5'><strong>A special status</strong></font></td> </tr> <tr> <td align='left' valign='top'><p><font color='#000000'>Kosovo is administered by the UN Mission in Kosovo under Security Council Resolution 1244. Because of this status, Kosovo representatives were not sitting at the Millennium Summit and thus have not signed its declaration. The Goals that stand out from this declaration are nonetheless relevant to the situation in Kosovo.  UNDP Kosovo, with support from UNICEF, the United Nations Development Fund for Women, the United Nations Food and Agriculture Organization, UN-Habitat, and the United Nations Volunteers, supported the Gjakova municipality, revising the existing municipal development plan and bringing it in line with the MDGs.</font></p></td> </tr> <tr> <td align='left' valign='top'><a href='http://www.mdgmonitor.org/factsheets_00.cfm?c=KOS'>Read more... </a></td> </tr> <tr> <td align='right' valign='top'><p>Read related articles on <a href='http://news.google.com/archivesearch?hl=en&ned=us&ie=UTF-8&q=kosovo+%22millennium+development+goals%22'>Google News</a></p></td> </tr> <tr> <td align='right' valign='top'>&nbsp;</td> </tr> <tr> <td align='center'><table border='0' cellpadding='0' cellspacing='0'> <tr> <td align='right' valign='middle'><a href='http://www.un.org/'><img src='files/un_logo_small.png' alt='UN logo' border='0' /></a></td> <td align='left' valign='middle'><font color='#666666'>The  <a href="http://www.un.org/millenniumgoals/" target="_blank">Millennium Development Goals </a>(MDGs) were laid out by the leaders of the world in 2000. They include  halving extreme poverty, halting the spread of HIV/AIDS and   providing universal primary education, all by 2015.</font></td> </tr> </table></td> </tr> </table>]]></description>
			<styleUrl>#text_photo_banner</styleUrl>
			<Point>
				<coordinates>21.16453900000001,42.672421,0</coordinates>
			</Point>
		</Placemark>
		<Placemark>
			<name>Kuwait</name>
			<visibility>0</visibility>
			<address>http://www.mdgmonitor.org/factsheets_00.cfm?c=KWT</address>
			<Snippet maxLines="2"></Snippet>
			<description><![CDATA[<table width='350' border='0' cellpadding='3' cellspacing='0' bgcolor='#FFFFFF'> <tr> <td align='left'><table border='0' cellspacing='0' cellpadding='0'> <tr> <td rowspan='2' align='left' valign='middle'><a href='http://www.mdgmonitor.org/'><img src='files/mdg_logo.png' alt='mdp logo' border='0' /></a></td> <td align='left' valign='bottom'><font color='#00486D' size='6'><b>MDG</b>MONITOR</td> </tr> <tr> <td align='right' valign='top'><font color='#00486D' size='4'>Track. Learn. Support.</font></td> </tr> </table></td> </tr> <tr> <td align='left' valign='top' bgcolor='#003F7C'><font color='#FFFFFF' size='5'><strong>Kuwait</strong></font></td> </tr> <tr> <td align='left' valign='top'><table border='0' cellspacing='0' cellpadding='0'> <tr> <td align='left' valign='top'><a href='http://www.mdgmonitor.org/factsheets_00.cfm?c=KWT'><img src='files/Kuwait.jpg' alt='image' width='200' border='0' align='left' /></a></td> <td align='left' valign='middle'><p><strong><font size='3'>Total Population (millions):</font> </strong>2.69</p><p><strong><font size'3'><a href='http://unstats.un.org/unsd/cdb/cdb_dict_xrxx.asp?def_code=63'>GDP</a> per capita (PPP US$):</font></strong> 21534 </p><p><font size='3'><strong>2006 <a href='http://hdr.undp.org/hdr2006/statistics/indices/default.cfm' target='_blank'>Human Development Index</a> (Rank 1-177):</strong> </font>33 </p></td> </tr> </table></td> </tr> <tr> <td align='left' valign='top'><font color='#003F7C' size='5'><strong>Empowering women politically</strong></font></td> </tr> <tr> <td align='left' valign='top'><p><font color='#000000'>Kuwait faces its main challenges in the areas of gender equality and the empowerment of women (Goal No. 3) and environmental sustainability (Goal No. 7). While Kuwait is performing very well in women’s education, literacy, and wage employment, the main difficulty lies in the political empowerment of women. In May 2005 there was a breakthrough when the National Assembly approved an amendment to the elections law, allowing women to vote and run for office for the first time. On the environmental sustainability front, two indicators present a problem: energy use and carbon dioxide emissions.</font></p></td> </tr> <tr> <td align='left' valign='top'><a href='http://www.mdgmonitor.org/factsheets_00.cfm?c=KWT'>Read more... </a></td> </tr> <tr> <td align='right' valign='top'><p>Read related articles on <a href='http://news.google.com/archivesearch?q=kuwait+%22millennium+development+goals%22&hl=en&ned=us&ie=UTF-8'>Google News</a></p></td> </tr> <tr> <td align='right' valign='top'>&nbsp;</td> </tr> <tr> <td align='center'><table border='0' cellpadding='0' cellspacing='0'> <tr> <td align='right' valign='middle'><a href='http://www.un.org/'><img src='files/un_logo_small.png' alt='UN logo' border='0' /></a></td> <td align='left' valign='middle'><font color='#666666'>The  <a href="http://www.un.org/millenniumgoals/" target="_blank">Millennium Development Goals </a>(MDGs) were laid out by the leaders of the world in 2000. They include  halving extreme poverty, halting the spread of HIV/AIDS and   providing universal primary education, all by 2015.</font></td> </tr> </table></td> </tr> </table>]]></description>
			<styleUrl>#text_photo_banner</styleUrl>
			<Point>
				<coordinates>47.990001,29.379999,0</coordinates>
			</Point>
		</Placemark>
		<Placemark>
			<name>Kyrgyz Republic</name>
			<visibility>0</visibility>
			<address>http://www.mdgmonitor.org/factsheets_00.cfm?c=KGZ</address>
			<Snippet maxLines="2"></Snippet>
			<description><![CDATA[<table width='350' border='0' cellpadding='3' cellspacing='0' bgcolor='#FFFFFF'> <tr> <td align='left'><table border='0' cellspacing='0' cellpadding='0'> <tr> <td rowspan='2' align='left' valign='middle'><a href='http://www.mdgmonitor.org/'><img src='files/mdg_logo.png' alt='mdp logo' border='0' /></a></td> <td align='left' valign='bottom'><font color='#00486D' size='6'><b>MDG</b>MONITOR</td> </tr> <tr> <td align='right' valign='top'><font color='#00486D' size='4'>Track. Learn. Support.</font></td> </tr> </table></td> </tr> <tr> <td align='left' valign='top' bgcolor='#003F7C'><font color='#FFFFFF' size='5'><strong>Kyrgyz Republic</strong></font></td> </tr> <tr> <td align='left' valign='top'><table border='0' cellspacing='0' cellpadding='0'> <tr> <td align='left' valign='top'><a href='http://www.mdgmonitor.org/factsheets_00.cfm?c=KGZ'><img src='files/kyrgyzstan.jpg' alt='image' width='200' border='0' align='left' /></a></td> <td align='left' valign='middle'><p><strong><font size='3'>Total Population (millions):</font> </strong>5.26</p><p><strong><font size'3'><a href='http://unstats.un.org/unsd/cdb/cdb_dict_xrxx.asp?def_code=63'>GDP</a> per capita (PPP US$):</font></strong> 1934 </p><p><font size='3'><strong>2006 <a href='http://hdr.undp.org/hdr2006/statistics/indices/default.cfm' target='_blank'>Human Development Index</a> (Rank 1-177):</strong> </font>110 </p></td> </tr> </table></td> </tr> <tr> <td align='left' valign='top'><font color='#003F7C' size='5'><strong>Gender equality as a major issue</strong></font></td> </tr> <tr> <td align='left' valign='top'><p><font color='#000000'>Kyrgyzstan has a mixed track record in its progress towards achieving the MDGs. Since the fall of the Soviet Union, Kyrgyzstan has suffered  increased gender inequality. For instance, women’s wages represent 66 percent of those of men. Also, there are no women represented in the parliament and no female heads in government agencies. Health-care reform has been ongoing for 10 years, but ensuring universal access to qualified obstetrics and childbirth services is still a problem, especially in rural areas.</font></p></td> </tr> <tr> <td align='left' valign='top'><a href='http://www.mdgmonitor.org/factsheets_00.cfm?c=KGZ'>Read more... </a></td> </tr> <tr> <td align='right' valign='top'><p>Read related articles on <a href='http://news.google.com/archivesearch?q=kyrgyzstan+%22millennium+development+goals%22&hl=en&ned=us&ie=UTF-8'>Google News</a></p></td> </tr> <tr> <td align='right' valign='top'>&nbsp;</td> </tr> <tr> <td align='center'><table border='0' cellpadding='0' cellspacing='0'> <tr> <td align='right' valign='middle'><a href='http://www.un.org/'><img src='files/un_logo_small.png' alt='UN logo' border='0' /></a></td> <td align='left' valign='middle'><font color='#666666'>The  <a href="http://www.un.org/millenniumgoals/" target="_blank">Millennium Development Goals </a>(MDGs) were laid out by the leaders of the world in 2000. They include  halving extreme poverty, halting the spread of HIV/AIDS and   providing universal primary education, all by 2015.</font></td> </tr> </table></td> </tr> </table>]]></description>
			<styleUrl>#text_photo_banner</styleUrl>
			<Point>
				<coordinates>74.587925,42.870039,0</coordinates>
			</Point>
		</Placemark>
		<Placemark>
			<name>Lao People&apos;s Democratic Republic</name>
			<visibility>0</visibility>
			<address>http://www.mdgmonitor.org/factsheets_00.cfm?c=LAO</address>
			<Snippet maxLines="2"></Snippet>
			<description><![CDATA[<table width='350' border='0' cellpadding='3' cellspacing='0' bgcolor='#FFFFFF'> <tr> <td align='left'><table border='0' cellspacing='0' cellpadding='0'> <tr> <td rowspan='2' align='left' valign='middle'><a href='http://www.mdgmonitor.org/'><img src='files/mdg_logo.png' alt='mdp logo' border='0' /></a></td> <td align='left' valign='bottom'><font color='#00486D' size='6'><b>MDG</b>MONITOR</td> </tr> <tr> <td align='right' valign='top'><font color='#00486D' size='4'>Track. Learn. Support.</font></td> </tr> </table></td> </tr> <tr> <td align='left' valign='top' bgcolor='#003F7C'><font color='#FFFFFF' size='5'><strong>Lao People's Democratic Republic</strong></font></td> </tr> <tr> <td align='left' valign='top'><table border='0' cellspacing='0' cellpadding='0'> <tr> <td align='left' valign='top'><a href='http://www.mdgmonitor.org/factsheets_00.cfm?c=LAO'><img src='files/laos.jpg' alt='image' width='200' border='0' align='left' /></a></td> <td align='left' valign='middle'><p><strong><font size='3'>Total Population (millions):</font> </strong>5.92</p><p><strong><font size'3'><a href='http://unstats.un.org/unsd/cdb/cdb_dict_xrxx.asp?def_code=63'>GDP</a> per capita (PPP US$):</font></strong> 2182 </p><p><font size='3'><strong>2006 <a href='http://hdr.undp.org/hdr2006/statistics/indices/default.cfm' target='_blank'>Human Development Index</a> (Rank 1-177):</strong> </font>133 </p></td> </tr> </table></td> </tr> <tr> <td align='left' valign='top'><font color='#003F7C' size='5'><strong>Four priorities for the government</strong></font></td> </tr> <tr> <td align='left' valign='top'><p><font color='#000000'>The Government of the Lao People’s Democratic Republic identified four priorities: agriculture and forestry; education; health; and infrastructure. The Government also identified the 47 poorest districts and another 25 poor districts spread all over the country for poverty reduction interventions. If the trend continues, Laos will achieve the MDG target of reducing the proportion of people living below the poverty line by half by 2015. In 2000-2001, 304,100 households were classified as poor. By 2005, some 137,500 households had graduated from poverty.</font></p></td> </tr> <tr> <td align='left' valign='top'><a href='http://www.mdgmonitor.org/factsheets_00.cfm?c=LAO'>Read more... </a></td> </tr> <tr> <td align='right' valign='top'><p>Read related articles on <a href='http://news.google.com/archivesearch?q=laos++%22millennium+development+goals%22&hl=en&ned=us&ie=UTF-8'>Google News</a></p></td> </tr> <tr> <td align='right' valign='top'>&nbsp;</td> </tr> <tr> <td align='center'><table border='0' cellpadding='0' cellspacing='0'> <tr> <td align='right' valign='middle'><a href='http://www.un.org/'><img src='files/un_logo_small.png' alt='UN logo' border='0' /></a></td> <td align='left' valign='middle'><font color='#666666'>The  <a href="http://www.un.org/millenniumgoals/" target="_blank">Millennium Development Goals </a>(MDGs) were laid out by the leaders of the world in 2000. They include  halving extreme poverty, halting the spread of HIV/AIDS and   providing universal primary education, all by 2015.</font></td> </tr> </table></td> </tr> </table>]]></description>
			<styleUrl>#text_photo_banner</styleUrl>
			<Point>
				<coordinates>102.61,17.969999,0</coordinates>
			</Point>
		</Placemark>
		<Placemark>
			<name>Lebanon</name>
			<visibility>0</visibility>
			<address>http://www.mdgmonitor.org/factsheets_00.cfm?c=LBN</address>
			<Snippet maxLines="2"></Snippet>
			<description><![CDATA[<table width='350' border='0' cellpadding='3' cellspacing='0' bgcolor='#FFFFFF'> <tr> <td align='left'><table border='0' cellspacing='0' cellpadding='0'> <tr> <td rowspan='2' align='left' valign='middle'><a href='http://www.mdgmonitor.org/'><img src='files/mdg_logo.png' alt='mdp logo' border='0' /></a></td> <td align='left' valign='bottom'><font color='#00486D' size='6'><b>MDG</b>MONITOR</td> </tr> <tr> <td align='right' valign='top'><font color='#00486D' size='4'>Track. Learn. Support.</font></td> </tr> </table></td> </tr> <tr> <td align='left' valign='top' bgcolor='#003F7C'><font color='#FFFFFF' size='5'><strong>Lebanon</strong></font></td> </tr> <tr> <td align='left' valign='top'><table border='0' cellspacing='0' cellpadding='0'> <tr> <td align='left' valign='top'><a href='http://www.mdgmonitor.org/factsheets_00.cfm?c=LBN'><img src='files/lebanon.jpg' alt='image' width='200' border='0' align='left' /></a></td> <td align='left' valign='middle'><p><strong><font size='3'>Total Population (millions):</font> </strong>3.58</p><p><strong><font size'3'><a href='http://unstats.un.org/unsd/cdb/cdb_dict_xrxx.asp?def_code=63'>GDP</a> per capita (PPP US$):</font></strong> 6065 </p><p><font size='3'><strong>2006 <a href='http://hdr.undp.org/hdr2006/statistics/indices/default.cfm' target='_blank'>Human Development Index</a> (Rank 1-177):</strong> </font>78 </p></td> </tr> </table></td> </tr> <tr> <td align='left' valign='top'><font color='#003F7C' size='5'><strong>Resuming sustainable growth</strong></font></td> </tr> <tr> <td align='left' valign='top'><p><font color='#000000'>Several challenges continue to impede achievement of the MDGs in Lebanon. These include political instability, the impact of the July 2006 war, rising fiscal deficits and debt, a stagnating economy, increasing unemployment, and widening regional disparities. Nevertheless, the Government of Lebanon has finalized an ambitious medium-term reform and reconstruction programme that addresses economic and fiscal adjustments to place Lebanon on a sustainable growth path.</font></p></td> </tr> <tr> <td align='left' valign='top'><a href='http://www.mdgmonitor.org/factsheets_00.cfm?c=LBN'>Read more... </a></td> </tr> <tr> <td align='right' valign='top'><p>Read related articles on <a href='http://news.google.com/archivesearch?hl=en&ned=us&q=lebanon%22millennium+development+goals%22&spell=1'>Google News</a></p></td> </tr> <tr> <td align='right' valign='top'>&nbsp;</td> </tr> <tr> <td align='center'><table border='0' cellpadding='0' cellspacing='0'> <tr> <td align='right' valign='middle'><a href='http://www.un.org/'><img src='files/un_logo_small.png' alt='UN logo' border='0' /></a></td> <td align='left' valign='middle'><font color='#666666'>The  <a href="http://www.un.org/millenniumgoals/" target="_blank">Millennium Development Goals </a>(MDGs) were laid out by the leaders of the world in 2000. They include  halving extreme poverty, halting the spread of HIV/AIDS and   providing universal primary education, all by 2015.</font></td> </tr> </table></td> </tr> </table>]]></description>
			<styleUrl>#text_photo_banner</styleUrl>
			<Point>
				<coordinates>35.513404,33.887189,0</coordinates>
			</Point>
		</Placemark>
		<Placemark>
			<name>Lesotho</name>
			<visibility>0</visibility>
			<address>http://www.mdgmonitor.org/factsheets_00.cfm?c=LSO</address>
			<Snippet maxLines="2"></Snippet>
			<description><![CDATA[<table width='350' border='0' cellpadding='3' cellspacing='0' bgcolor='#FFFFFF'> <tr> <td align='left'><table border='0' cellspacing='0' cellpadding='0'> <tr> <td rowspan='2' align='left' valign='middle'><a href='http://www.mdgmonitor.org/'><img src='files/mdg_logo.png' alt='mdp logo' border='0' /></a></td> <td align='left' valign='bottom'><font color='#00486D' size='6'><b>MDG</b>MONITOR</td> </tr> <tr> <td align='right' valign='top'><font color='#00486D' size='4'>Track. Learn. Support.</font></td> </tr> </table></td> </tr> <tr> <td align='left' valign='top' bgcolor='#003F7C'><font color='#FFFFFF' size='5'><strong>Lesotho</strong></font></td> </tr> <tr> <td align='left' valign='top'><table border='0' cellspacing='0' cellpadding='0'> <tr> <td align='left' valign='top'><a href='http://www.mdgmonitor.org/factsheets_00.cfm?c=LSO'><img src='files/lesotho.jpg' alt='image' width='200' border='0' align='left' /></a></td> <td align='left' valign='middle'><p><strong><font size='3'>Total Population (millions):</font> </strong>1.79</p><p><strong><font size'3'><a href='http://unstats.un.org/unsd/cdb/cdb_dict_xrxx.asp?def_code=63'>GDP</a> per capita (PPP US$):</font></strong> 2764 </p><p><font size='3'><strong>2006 <a href='http://hdr.undp.org/hdr2006/statistics/indices/default.cfm' target='_blank'>Human Development Index</a> (Rank 1-177):</strong> </font>149 </p></td> </tr> </table></td> </tr> <tr> <td align='left' valign='top'><font color='#003F7C' size='5'><strong>Education for the country</strong></font></td> </tr> <tr> <td align='left' valign='top'><p><font color='#000000'>The Government of Lesotho is committed to providing education for its people. Primary school enrolment currently stands at 85 percent, one of the highest levels in sub-Saharan Africa. However, progress has been slow on a number of other fronts. For instance Lesotho has an adult HIV/AIDS prevalence rate of 23.2 percent, the third highest in the world. Poverty is equally pervasive. The poorest 10 percent of the population hold less than 1 percent of the national income, while the richest 10 percent control more than 50 percent of it.</font></p></td> </tr> <tr> <td align='left' valign='top'><a href='http://www.mdgmonitor.org/factsheets_00.cfm?c=LSO'>Read more... </a></td> </tr> <tr> <td align='right' valign='top'><p>Read related articles on <a href='http://news.google.com/archivesearch?hl=en&ned=us&ie=UTF-8&q=lesotho+%22millennium+development+goals%22'>Google News</a></p></td> </tr> <tr> <td align='right' valign='top'>&nbsp;</td> </tr> <tr> <td align='center'><table border='0' cellpadding='0' cellspacing='0'> <tr> <td align='right' valign='middle'><a href='http://www.un.org/'><img src='files/un_logo_small.png' alt='UN logo' border='0' /></a></td> <td align='left' valign='middle'><font color='#666666'>The  <a href="http://www.un.org/millenniumgoals/" target="_blank">Millennium Development Goals </a>(MDGs) were laid out by the leaders of the world in 2000. They include  halving extreme poverty, halting the spread of HIV/AIDS and   providing universal primary education, all by 2015.</font></td> </tr> </table></td> </tr> </table>]]></description>
			<styleUrl>#text_photo_banner</styleUrl>
			<Point>
				<coordinates>27.48892692,-29.31202768,0</coordinates>
			</Point>
		</Placemark>
		<Placemark>
			<name>Liberia</name>
			<visibility>0</visibility>
			<address>http://www.mdgmonitor.org/factsheets_00.cfm?c=LIB</address>
			<Snippet maxLines="2"></Snippet>
			<description><![CDATA[<table width='350' border='0' cellpadding='3' cellspacing='0' bgcolor='#FFFFFF'> <tr> <td align='left'><table border='0' cellspacing='0' cellpadding='0'> <tr> <td rowspan='2' align='left' valign='middle'><a href='http://www.mdgmonitor.org/'><img src='files/mdg_logo.png' alt='mdp logo' border='0' /></a></td> <td align='left' valign='bottom'><font color='#00486D' size='6'><b>MDG</b>MONITOR</td> </tr> <tr> <td align='right' valign='top'><font color='#00486D' size='4'>Track. Learn. Support.</font></td> </tr> </table></td> </tr> <tr> <td align='left' valign='top' bgcolor='#003F7C'><font color='#FFFFFF' size='5'><strong>Liberia</strong></font></td> </tr> <tr> <td align='left' valign='top'><table border='0' cellspacing='0' cellpadding='0'> <tr> <td align='left' valign='top'><a href='http://www.mdgmonitor.org/factsheets_00.cfm?c=LIB'><img src='files/liberia.jpg' alt='image' width='200' border='0' align='left' /></a></td> <td align='left' valign='middle'><p><strong><font size='3'>Total Population (millions):</font> </strong>3.28</p><p><strong><font size'3'><a href='http://unstats.un.org/unsd/cdb/cdb_dict_xrxx.asp?def_code=63'>GDP</a> per capita (PPP US$):</font></strong> NA </p><p><font size='3'><strong>2006 <a href='http://hdr.undp.org/hdr2006/statistics/indices/default.cfm' target='_blank'>Human Development Index</a> (Rank 1-177):</strong> </font>NA </p></td> </tr> </table></td> </tr> <tr> <td align='left' valign='top'><font color='#003F7C' size='5'><strong>Recovering from conflict</strong></font></td> </tr> <tr> <td align='left' valign='top'><p><font color='#000000'>Recovery from the prolonged conflict in Liberia has undermined the prospect of the country achieving the MDGs. The new president of Liberia, Ellen Johnson Sirleaf, has promised that her government would accelerate efforts to achieve the MDGs.  After the official launch of the MDG Report of Liberia, workshops were held for civil servants and government officials acquainting them with the report and the MDGs.  Another major success was the restoration of electricity to some parts of the capital.</font></p></td> </tr> <tr> <td align='left' valign='top'><a href='http://www.mdgmonitor.org/factsheets_00.cfm?c=LIB'>Read more... </a></td> </tr> <tr> <td align='right' valign='top'><p>Read related articles on <a href='http://news.google.com/archivesearch?q=liberia+%22millennium+development+goals%22&hl=en&ned=us&ie=UTF-8'>Google News</a></p></td> </tr> <tr> <td align='right' valign='top'>&nbsp;</td> </tr> <tr> <td align='center'><table border='0' cellpadding='0' cellspacing='0'> <tr> <td align='right' valign='middle'><a href='http://www.un.org/'><img src='files/un_logo_small.png' alt='UN logo' border='0' /></a></td> <td align='left' valign='middle'><font color='#666666'>The  <a href="http://www.un.org/millenniumgoals/" target="_blank">Millennium Development Goals </a>(MDGs) were laid out by the leaders of the world in 2000. They include  halving extreme poverty, halting the spread of HIV/AIDS and   providing universal primary education, all by 2015.</font></td> </tr> </table></td> </tr> </table>]]></description>
			<styleUrl>#text_photo_banner</styleUrl>
			<Point>
				<coordinates>-10.8,6.309999000000002,0</coordinates>
			</Point>
		</Placemark>
		<Placemark>
			<name>Libyan Arab Jamahiriya (Libya)</name>
			<visibility>0</visibility>
			<address>http://www.mdgmonitor.org/factsheets_00.cfm?c=LBY</address>
			<Snippet maxLines="2"></Snippet>
			<description><![CDATA[<table width='350' border='0' cellpadding='3' cellspacing='0' bgcolor='#FFFFFF'> <tr> <td align='left'><table border='0' cellspacing='0' cellpadding='0'> <tr> <td rowspan='2' align='left' valign='middle'><a href='http://www.mdgmonitor.org/'><img src='files/mdg_logo.png' alt='mdp logo' border='0' /></a></td> <td align='left' valign='bottom'><font color='#00486D' size='6'><b>MDG</b>MONITOR</td> </tr> <tr> <td align='right' valign='top'><font color='#00486D' size='4'>Track. Learn. Support.</font></td> </tr> </table></td> </tr> <tr> <td align='left' valign='top' bgcolor='#003F7C'><font color='#FFFFFF' size='5'><strong>Libyan Arab Jamahiriya (Libya)</strong></font></td> </tr> <tr> <td align='left' valign='top'><table border='0' cellspacing='0' cellpadding='0'> <tr> <td align='left' valign='top'><a href='http://www.mdgmonitor.org/factsheets_00.cfm?c=LBY'><img src='files/libya.jpg' alt='image' width='200' border='0' align='left' /></a></td> <td align='left' valign='middle'><p><strong><font size='3'>Total Population (millions):</font> </strong>5.85</p><p><strong><font size'3'><a href='http://unstats.un.org/unsd/cdb/cdb_dict_xrxx.asp?def_code=63'>GDP</a> per capita (PPP US$):</font></strong> NA </p><p><font size='3'><strong>2006 <a href='http://hdr.undp.org/hdr2006/statistics/indices/default.cfm' target='_blank'>Human Development Index</a> (Rank 1-177):</strong> </font>64 </p></td> </tr> </table></td> </tr> <tr> <td align='left' valign='top'><font color='#003F7C' size='5'><strong>Unemployment, the environment and non-oil revenue</strong></font></td> </tr> <tr> <td align='left' valign='top'><p><font color='#000000'>Libya’s oil and natural gas resources translate into relatively high per capita incomes and health indicators as well as good levels of education. All MDGs are likely to be achieved in the country. Nonetheless, the country faces the challenges of rising unemployment, environmental degradation, and development of non-oil sectors. The government is in the process of diversifying its economy with a focus on private sector development to create more jobs.</font></p></td> </tr> <tr> <td align='left' valign='top'><a href='http://www.mdgmonitor.org/factsheets_00.cfm?c=LBY'>Read more... </a></td> </tr> <tr> <td align='right' valign='top'><p>Read related articles on <a href='http://news.google.com/archivesearch?q=libya+%22millennium+development+goals%22&hl=en&ned=us&ie=UTF-8'>Google News</a></p></td> </tr> <tr> <td align='right' valign='top'>&nbsp;</td> </tr> <tr> <td align='center'><table border='0' cellpadding='0' cellspacing='0'> <tr> <td align='right' valign='middle'><a href='http://www.un.org/'><img src='files/un_logo_small.png' alt='UN logo' border='0' /></a></td> <td align='left' valign='middle'><font color='#666666'>The  <a href="http://www.un.org/millenniumgoals/" target="_blank">Millennium Development Goals </a>(MDGs) were laid out by the leaders of the world in 2000. They include  halving extreme poverty, halting the spread of HIV/AIDS and   providing universal primary education, all by 2015.</font></td> </tr> </table></td> </tr> </table>]]></description>
			<styleUrl>#text_photo_banner</styleUrl>
			<Point>
				<coordinates>13.17010355,32.88853112,0</coordinates>
			</Point>
		</Placemark>
		<Placemark>
			<name>Lithuania</name>
			<visibility>0</visibility>
			<address>http://www.mdgmonitor.org/factsheets_00.cfm?c=LTU</address>
			<Snippet maxLines="2"></Snippet>
			<description><![CDATA[<table width='350' border='0' cellpadding='3' cellspacing='0' bgcolor='#FFFFFF'> <tr> <td align='left'><table border='0' cellspacing='0' cellpadding='0'> <tr> <td rowspan='2' align='left' valign='middle'><a href='http://www.mdgmonitor.org/'><img src='files/mdg_logo.png' alt='mdp logo' border='0' /></a></td> <td align='left' valign='bottom'><font color='#00486D' size='6'><b>MDG</b>MONITOR</td> </tr> <tr> <td align='right' valign='top'><font color='#00486D' size='4'>Track. Learn. Support.</font></td> </tr> </table></td> </tr> <tr> <td align='left' valign='top' bgcolor='#003F7C'><font color='#FFFFFF' size='5'><strong>Lithuania</strong></font></td> </tr> <tr> <td align='left' valign='top'><table border='0' cellspacing='0' cellpadding='0'> <tr> <td align='left' valign='top'><a href='http://www.mdgmonitor.org/factsheets_00.cfm?c=LTU'><img src='files/lithuania.jpg' alt='image' width='200' border='0' align='left' /></a></td> <td align='left' valign='middle'><p><strong><font size='3'>Total Population (millions):</font> </strong>3.43</p><p><strong><font size'3'><a href='http://unstats.un.org/unsd/cdb/cdb_dict_xrxx.asp?def_code=63'>GDP</a> per capita (PPP US$):</font></strong> 14382 </p><p><font size='3'><strong>2006 <a href='http://hdr.undp.org/hdr2006/statistics/indices/default.cfm' target='_blank'>Human Development Index</a> (Rank 1-177):</strong> </font>41 </p></td> </tr> </table></td> </tr> <tr> <td align='left' valign='top'><font color='#003F7C' size='5'><strong>A new donor</strong></font></td> </tr> <tr> <td align='left' valign='top'><p><font color='#000000'>Lithuania, as a country with a high level of human development and a new European Union Member State, has basically achieved the Millennium Development Goals (MDGs). MDG 8, which calls for a global partnership for development, is becoming particularly relevant for Lithuania as the country looks forward to helping achieve the Goals in its own region and around the world.</font></p></td> </tr> <tr> <td align='left' valign='top'><a href='http://www.mdgmonitor.org/factsheets_00.cfm?c=LTU'>Read more... </a></td> </tr> <tr> <td align='right' valign='top'><p>Read related articles on <a href='http://news.google.com/archivesearch?q=lithuania+and+%22millennium+development+goals%22&hl=en&ned=us&ie=UTF-8'>Google News</a></p></td> </tr> <tr> <td align='right' valign='top'>&nbsp;</td> </tr> <tr> <td align='center'><table border='0' cellpadding='0' cellspacing='0'> <tr> <td align='right' valign='middle'><a href='http://www.un.org/'><img src='files/un_logo_small.png' alt='UN logo' border='0' /></a></td> <td align='left' valign='middle'><font color='#666666'>The  <a href="http://www.un.org/millenniumgoals/" target="_blank">Millennium Development Goals </a>(MDGs) were laid out by the leaders of the world in 2000. They include  halving extreme poverty, halting the spread of HIV/AIDS and   providing universal primary education, all by 2015.</font></td> </tr> </table></td> </tr> </table>]]></description>
			<styleUrl>#text_photo_banner</styleUrl>
			<Point>
				<coordinates>25.16591100000001,54.40545800000001,0</coordinates>
			</Point>
		</Placemark>
		<Placemark>
			<name>Macedonia, FYROM</name>
			<visibility>0</visibility>
			<address>http://www.mdgmonitor.org/factsheets_00.cfm?c=MKD</address>
			<Snippet maxLines="2"></Snippet>
			<description><![CDATA[<table width='350' border='0' cellpadding='3' cellspacing='0' bgcolor='#FFFFFF'> <tr> <td align='left'><table border='0' cellspacing='0' cellpadding='0'> <tr> <td rowspan='2' align='left' valign='middle'><a href='http://www.mdgmonitor.org/'><img src='files/mdg_logo.png' alt='mdp logo' border='0' /></a></td> <td align='left' valign='bottom'><font color='#00486D' size='6'><b>MDG</b>MONITOR</td> </tr> <tr> <td align='right' valign='top'><font color='#00486D' size='4'>Track. Learn. Support.</font></td> </tr> </table></td> </tr> <tr> <td align='left' valign='top' bgcolor='#003F7C'><font color='#FFFFFF' size='5'><strong>Macedonia, FYROM</strong></font></td> </tr> <tr> <td align='left' valign='top'><table border='0' cellspacing='0' cellpadding='0'> <tr> <td align='left' valign='top'><a href='http://www.mdgmonitor.org/factsheets_00.cfm?c=MKD'><img src='files/macedonia.jpg' alt='image' width='200' border='0' align='left' /></a></td> <td align='left' valign='middle'><p><strong><font size='3'>Total Population (millions):</font> </strong>2.03</p><p><strong><font size'3'><a href='http://unstats.un.org/unsd/cdb/cdb_dict_xrxx.asp?def_code=63'>GDP</a> per capita (PPP US$):</font></strong> 7146 </p><p><font size='3'><strong>2006 <a href='http://hdr.undp.org/hdr2006/statistics/indices/default.cfm' target='_blank'>Human Development Index</a> (Rank 1-177):</strong> </font>66 </p></td> </tr> </table></td> </tr> <tr> <td align='left' valign='top'><font color='#003F7C' size='5'><strong>EU membership</strong></font></td> </tr> <tr> <td align='left' valign='top'><p><font color='#000000'>A candidate for membership of the European Union (EU), the former Yugoslav Republic of Macedonia (FYROM) is striving to become a democratic, multi-ethnic country. In order to carry out this project, the government is now basing its national development strategy on the eight goals. Priorities include: widening access to primary education; improving the living conditions of the most vulnerable groups (with an emphasis on the Roma); providing access to better health care services; and introducing legislation that would empower women.</font></p></td> </tr> <tr> <td align='left' valign='top'><a href='http://www.mdgmonitor.org/factsheets_00.cfm?c=MKD'>Read more... </a></td> </tr> <tr> <td align='right' valign='top'><p>Read related articles on <a href='http://news.google.com/news?hl=en&ned=us&ie=UTF-8&q=macedonia+%22millennium+development+goals%22'>Google News</a></p></td> </tr> <tr> <td align='right' valign='top'>&nbsp;</td> </tr> <tr> <td align='center'><table border='0' cellpadding='0' cellspacing='0'> <tr> <td align='right' valign='middle'><a href='http://www.un.org/'><img src='files/un_logo_small.png' alt='UN logo' border='0' /></a></td> <td align='left' valign='middle'><font color='#666666'>The  <a href="http://www.un.org/millenniumgoals/" target="_blank">Millennium Development Goals </a>(MDGs) were laid out by the leaders of the world in 2000. They include  halving extreme poverty, halting the spread of HIV/AIDS and   providing universal primary education, all by 2015.</font></td> </tr> </table></td> </tr> </table>]]></description>
			<styleUrl>#text_photo_banner</styleUrl>
			<Point>
				<coordinates>21.469999,42,0</coordinates>
			</Point>
		</Placemark>
		<Placemark>
			<name>Madagascar</name>
			<visibility>0</visibility>
			<address>http://www.mdgmonitor.org/factsheets_00.cfm?c=MDG</address>
			<Snippet maxLines="2"></Snippet>
			<description><![CDATA[<table width='350' border='0' cellpadding='3' cellspacing='0' bgcolor='#FFFFFF'> <tr> <td align='left'><table border='0' cellspacing='0' cellpadding='0'> <tr> <td rowspan='2' align='left' valign='middle'><a href='http://www.mdgmonitor.org/'><img src='files/mdg_logo.png' alt='mdp logo' border='0' /></a></td> <td align='left' valign='bottom'><font color='#00486D' size='6'><b>MDG</b>MONITOR</td> </tr> <tr> <td align='right' valign='top'><font color='#00486D' size='4'>Track. Learn. Support.</font></td> </tr> </table></td> </tr> <tr> <td align='left' valign='top' bgcolor='#003F7C'><font color='#FFFFFF' size='5'><strong>Madagascar</strong></font></td> </tr> <tr> <td align='left' valign='top'><table border='0' cellspacing='0' cellpadding='0'> <tr> <td align='left' valign='top'><a href='http://www.mdgmonitor.org/factsheets_00.cfm?c=MDG'><img src='files/madagascar.jpg' alt='image' width='200' border='0' align='left' /></a></td> <td align='left' valign='middle'><p><strong><font size='3'>Total Population (millions):</font> </strong>18.61</p><p><strong><font size'3'><a href='http://unstats.un.org/unsd/cdb/cdb_dict_xrxx.asp?def_code=63'>GDP</a> per capita (PPP US$):</font></strong> 897 </p><p><font size='3'><strong>2006 <a href='http://hdr.undp.org/hdr2006/statistics/indices/default.cfm' target='_blank'>Human Development Index</a> (Rank 1-177):</strong> </font>143 </p></td> </tr> </table></td> </tr> <tr> <td align='left' valign='top'><font color='#003F7C' size='5'><strong>Madagascar's "Action Plan"</strong></font></td> </tr> <tr> <td align='left' valign='top'><p><font color='#000000'>Devised in 2005, Madagascar’s “Action Plan” aims to reduce the percentage of people living on less than $2 a day from 85.1 percent in 2003 to 50 percent in 2012. In 2006, the national poverty level was down to 67.5, which indicates that the country is making good progress toward achieving the MDGs, largely as a result of improvements in education and health.</font></p></td> </tr> <tr> <td align='left' valign='top'><a href='http://www.mdgmonitor.org/factsheets_00.cfm?c=MDG'>Read more... </a></td> </tr> <tr> <td align='right' valign='top'><p>Read related articles on <a href='http://news.google.com/news?hl=en&ned=us&ie=UTF-8&q=madagascar+%22millennium+development+goals%22'>Google News</a></p></td> </tr> <tr> <td align='right' valign='top'>&nbsp;</td> </tr> <tr> <td align='center'><table border='0' cellpadding='0' cellspacing='0'> <tr> <td align='right' valign='middle'><a href='http://www.un.org/'><img src='files/un_logo_small.png' alt='UN logo' border='0' /></a></td> <td align='left' valign='middle'><font color='#666666'>The  <a href="http://www.un.org/millenniumgoals/" target="_blank">Millennium Development Goals </a>(MDGs) were laid out by the leaders of the world in 2000. They include  halving extreme poverty, halting the spread of HIV/AIDS and   providing universal primary education, all by 2015.</font></td> </tr> </table></td> </tr> </table>]]></description>
			<styleUrl>#text_photo_banner</styleUrl>
			<Point>
				<coordinates>47.51294463,-18.90703153,0</coordinates>
			</Point>
		</Placemark>
		<Placemark>
			<name>Malawi</name>
			<visibility>0</visibility>
			<address>http://www.mdgmonitor.org/factsheets_00.cfm?c=MWI</address>
			<Snippet maxLines="2"></Snippet>
			<description><![CDATA[<table width='350' border='0' cellpadding='3' cellspacing='0' bgcolor='#FFFFFF'> <tr> <td align='left'><table border='0' cellspacing='0' cellpadding='0'> <tr> <td rowspan='2' align='left' valign='middle'><a href='http://www.mdgmonitor.org/'><img src='files/mdg_logo.png' alt='mdp logo' border='0' /></a></td> <td align='left' valign='bottom'><font color='#00486D' size='6'><b>MDG</b>MONITOR</td> </tr> <tr> <td align='right' valign='top'><font color='#00486D' size='4'>Track. Learn. Support.</font></td> </tr> </table></td> </tr> <tr> <td align='left' valign='top' bgcolor='#003F7C'><font color='#FFFFFF' size='5'><strong>Malawi</strong></font></td> </tr> <tr> <td align='left' valign='top'><table border='0' cellspacing='0' cellpadding='0'> <tr> <td align='left' valign='top'><a href='http://www.mdgmonitor.org/factsheets_00.cfm?c=MWI'><img src='files/malawi.jpg' alt='image' width='200' border='0' align='left' /></a></td> <td align='left' valign='middle'><p><strong><font size='3'>Total Population (millions):</font> </strong>12.88</p><p><strong><font size'3'><a href='http://unstats.un.org/unsd/cdb/cdb_dict_xrxx.asp?def_code=63'>GDP</a> per capita (PPP US$):</font></strong> 667 </p><p><font size='3'><strong>2006 <a href='http://hdr.undp.org/hdr2006/statistics/indices/default.cfm' target='_blank'>Human Development Index</a> (Rank 1-177):</strong> </font>166 </p></td> </tr> </table></td> </tr> <tr> <td align='left' valign='top'><font color='#003F7C' size='5'><strong>Bold new initiatives</strong></font></td> </tr> <tr> <td align='left' valign='top'><p><font color='#000000'>The MDGs are an integral part of Malawi’s national development strategy and the government has been very active in its endeavour to achieve the goals. In 2005 for instance, it introduced a farm-input subsidy programme, averting a famine and even resulting in excess crops by the next year. In 2007, the government launched a massive HIV testing programme to identify tens of thousands of people unknowingly infected with the virus in the southern African nation.  Some of the major challenges include HIV/AIDS, maternal mortality and disparities between men and women.</font></p></td> </tr> <tr> <td align='left' valign='top'><a href='http://www.mdgmonitor.org/factsheets_00.cfm?c=MWI'>Read more... </a></td> </tr> <tr> <td align='right' valign='top'><p>Read related articles on <a href='http://news.google.com/news?hl=en&ned=us&ie=UTF-8&q=malawi+%22millennium+development+goals%22'>Google News</a></p></td> </tr> <tr> <td align='right' valign='top'>&nbsp;</td> </tr> <tr> <td align='center'><table border='0' cellpadding='0' cellspacing='0'> <tr> <td align='right' valign='middle'><a href='http://www.un.org/'><img src='files/un_logo_small.png' alt='UN logo' border='0' /></a></td> <td align='left' valign='middle'><font color='#666666'>The  <a href="http://www.un.org/millenniumgoals/" target="_blank">Millennium Development Goals </a>(MDGs) were laid out by the leaders of the world in 2000. They include  halving extreme poverty, halting the spread of HIV/AIDS and   providing universal primary education, all by 2015.</font></td> </tr> </table></td> </tr> </table>]]></description>
			<styleUrl>#text_photo_banner</styleUrl>
			<Point>
				<coordinates>33.77108557,-13.97751121,0</coordinates>
			</Point>
		</Placemark>
		<Placemark>
			<name>Malaysia</name>
			<visibility>0</visibility>
			<address>http://www.mdgmonitor.org/factsheets_00.cfm?c=MYS</address>
			<Snippet maxLines="2"></Snippet>
			<description><![CDATA[<table width='350' border='0' cellpadding='3' cellspacing='0' bgcolor='#FFFFFF'> <tr> <td align='left'><table border='0' cellspacing='0' cellpadding='0'> <tr> <td rowspan='2' align='left' valign='middle'><a href='http://www.mdgmonitor.org/'><img src='files/mdg_logo.png' alt='mdp logo' border='0' /></a></td> <td align='left' valign='bottom'><font color='#00486D' size='6'><b>MDG</b>MONITOR</td> </tr> <tr> <td align='right' valign='top'><font color='#00486D' size='4'>Track. Learn. Support.</font></td> </tr> </table></td> </tr> <tr> <td align='left' valign='top' bgcolor='#003F7C'><font color='#FFFFFF' size='5'><strong>Malaysia</strong></font></td> </tr> <tr> <td align='left' valign='top'><table border='0' cellspacing='0' cellpadding='0'> <tr> <td align='left' valign='top'><a href='http://www.mdgmonitor.org/factsheets_00.cfm?c=MYS'><img src='files/malaysia.jpg' alt='image' width='200' border='0' align='left' /></a></td> <td align='left' valign='middle'><p><strong><font size='3'>Total Population (millions):</font> </strong>25.35</p><p><strong><font size'3'><a href='http://unstats.un.org/unsd/cdb/cdb_dict_xrxx.asp?def_code=63'>GDP</a> per capita (PPP US$):</font></strong> 10843 </p><p><font size='3'><strong>2006 <a href='http://hdr.undp.org/hdr2006/statistics/indices/default.cfm' target='_blank'>Human Development Index</a> (Rank 1-177):</strong> </font>61 </p></td> </tr> </table></td> </tr> <tr> <td align='left' valign='top'><font color='#003F7C' size='5'><strong>Regional disparities</strong></font></td> </tr> <tr> <td align='left' valign='top'><p><font color='#000000'>For the past thirty years, Malaysia’s New Economic Policy has succeeded in increasing income levels and employment opportunities for all. As a result, the country has achieved most of the MDGs. But some important challenges remain, including halting the spread of HIV/AIDS, promoting equality among the different ethnic communities, upgrading the living conditions of indigenous peoples and migrants, as well as improving the country’s environmental record. As it tackles these issues, the Malaysian government is now paying close attention to regional disparities, focusing for instance on the lesser developed East Malaysia states of Sarawak and Sabah.</font></p></td> </tr> <tr> <td align='left' valign='top'><a href='http://www.mdgmonitor.org/factsheets_00.cfm?c=MYS'>Read more... </a></td> </tr> <tr> <td align='right' valign='top'><p>Read related articles on <a href='http://news.google.com/news?hl=en&ned=us&ie=UTF-8&q=malaysia+%22millennium+development+goals%22'>Google News</a></p></td> </tr> <tr> <td align='right' valign='top'>&nbsp;</td> </tr> <tr> <td align='center'><table border='0' cellpadding='0' cellspacing='0'> <tr> <td align='right' valign='middle'><a href='http://www.un.org/'><img src='files/un_logo_small.png' alt='UN logo' border='0' /></a></td> <td align='left' valign='middle'><font color='#666666'>The  <a href="http://www.un.org/millenniumgoals/" target="_blank">Millennium Development Goals </a>(MDGs) were laid out by the leaders of the world in 2000. They include  halving extreme poverty, halting the spread of HIV/AIDS and   providing universal primary education, all by 2015.</font></td> </tr> </table></td> </tr> </table>]]></description>
			<styleUrl>#text_photo_banner</styleUrl>
			<Point>
				<coordinates>101.709999,3.16,0</coordinates>
			</Point>
		</Placemark>
		<Placemark>
			<name>Maldives</name>
			<visibility>0</visibility>
			<address>http://www.mdgmonitor.org/factsheets_00.cfm?c=MDV</address>
			<Snippet maxLines="2"></Snippet>
			<description><![CDATA[<table width='350' border='0' cellpadding='3' cellspacing='0' bgcolor='#FFFFFF'> <tr> <td align='left'><table border='0' cellspacing='0' cellpadding='0'> <tr> <td rowspan='2' align='left' valign='middle'><a href='http://www.mdgmonitor.org/'><img src='files/mdg_logo.png' alt='mdp logo' border='0' /></a></td> <td align='left' valign='bottom'><font color='#00486D' size='6'><b>MDG</b>MONITOR</td> </tr> <tr> <td align='right' valign='top'><font color='#00486D' size='4'>Track. Learn. Support.</font></td> </tr> </table></td> </tr> <tr> <td align='left' valign='top' bgcolor='#003F7C'><font color='#FFFFFF' size='5'><strong>Maldives</strong></font></td> </tr> <tr> <td align='left' valign='top'><table border='0' cellspacing='0' cellpadding='0'> <tr> <td align='left' valign='top'><a href='http://www.mdgmonitor.org/factsheets_00.cfm?c=MDV'><img src='files/maldives.jpg' alt='image' width='200' border='0' align='left' /></a></td> <td align='left' valign='middle'><p><strong><font size='3'>Total Population (millions):</font> </strong>0.33</p><p><strong><font size'3'><a href='http://unstats.un.org/unsd/cdb/cdb_dict_xrxx.asp?def_code=63'>GDP</a> per capita (PPP US$):</font></strong> NA </p><p><font size='3'><strong>2006 <a href='http://hdr.undp.org/hdr2006/statistics/indices/default.cfm' target='_blank'>Human Development Index</a> (Rank 1-177):</strong> </font>98 </p></td> </tr> </table></td> </tr> <tr> <td align='left' valign='top'><font color='#003F7C' size='5'><strong>Tsunami recovery</strong></font></td> </tr> <tr> <td align='left' valign='top'><p><font color='#000000'>Just prior to the Tsunami a preliminary assessment showed the Maldives was en route to achieving almost all the MDGs by 2015. Fewer than 1 percent of the population lived on less than a dollar a day. Primary school enrollment was near 100 percent, and the nation’s literacy rate was above 98 percent. Maldivian girls outnumbered boys in lower secondary education and infant mortality rates declining at a rapid pace. The December 2004 Tsunami has made the country more vulnerable, with much of the infrastructure destroyed and basic livelihoods washed away. The government and the UN are now focusing on shelter, infrastructure, livelihoods and disaster risk-management.</font></p></td> </tr> <tr> <td align='left' valign='top'><a href='http://www.mdgmonitor.org/factsheets_00.cfm?c=MDV'>Read more... </a></td> </tr> <tr> <td align='right' valign='top'><p>Read related articles on <a href='http://news.google.com/archivesearch?hl=en&ned=us&ie=UTF-8&q=maldives+%22millennium+development+goals%22'>Google News</a></p></td> </tr> <tr> <td align='right' valign='top'>&nbsp;</td> </tr> <tr> <td align='center'><table border='0' cellpadding='0' cellspacing='0'> <tr> <td align='right' valign='middle'><a href='http://www.un.org/'><img src='files/un_logo_small.png' alt='UN logo' border='0' /></a></td> <td align='left' valign='middle'><font color='#666666'>The  <a href="http://www.un.org/millenniumgoals/" target="_blank">Millennium Development Goals </a>(MDGs) were laid out by the leaders of the world in 2000. They include  halving extreme poverty, halting the spread of HIV/AIDS and   providing universal primary education, all by 2015.</font></td> </tr> </table></td> </tr> </table>]]></description>
			<styleUrl>#text_photo_banner</styleUrl>
			<Point>
				<coordinates>73.510919,4.174199,0</coordinates>
			</Point>
		</Placemark>
		<Placemark>
			<name>Mali</name>
			<visibility>0</visibility>
			<address>http://www.mdgmonitor.org/factsheets_00.cfm?c=MLI</address>
			<Snippet maxLines="2"></Snippet>
			<description><![CDATA[<table width='350' border='0' cellpadding='3' cellspacing='0' bgcolor='#FFFFFF'> <tr> <td align='left'><table border='0' cellspacing='0' cellpadding='0'> <tr> <td rowspan='2' align='left' valign='middle'><a href='http://www.mdgmonitor.org/'><img src='files/mdg_logo.png' alt='mdp logo' border='0' /></a></td> <td align='left' valign='bottom'><font color='#00486D' size='6'><b>MDG</b>MONITOR</td> </tr> <tr> <td align='right' valign='top'><font color='#00486D' size='4'>Track. Learn. Support.</font></td> </tr> </table></td> </tr> <tr> <td align='left' valign='top' bgcolor='#003F7C'><font color='#FFFFFF' size='5'><strong>Mali</strong></font></td> </tr> <tr> <td align='left' valign='top'><table border='0' cellspacing='0' cellpadding='0'> <tr> <td align='left' valign='top'><a href='http://www.mdgmonitor.org/factsheets_00.cfm?c=MLI'><img src='files/mali.jpg' alt='image' width='200' border='0' align='left' /></a></td> <td align='left' valign='middle'><p><strong><font size='3'>Total Population (millions):</font> </strong>13.52</p><p><strong><font size'3'><a href='http://unstats.un.org/unsd/cdb/cdb_dict_xrxx.asp?def_code=63'>GDP</a> per capita (PPP US$):</font></strong> 1040 </p><p><font size='3'><strong>2006 <a href='http://hdr.undp.org/hdr2006/statistics/indices/default.cfm' target='_blank'>Human Development Index</a> (Rank 1-177):</strong> </font>175 </p></td> </tr> </table></td> </tr> <tr> <td align='left' valign='top'><font color='#003F7C' size='5'><strong>Focusing on the health sector</strong></font></td> </tr> <tr> <td align='left' valign='top'><p><font color='#000000'>With 75% of children in school and 67% of the population who have access to safe drinking water, Mali has made notable accomplishments over the past years in education and water and sanitation. But there is a good deal of ground still to be covered in the health sector which is struggling to manage epidemiological surveillance. In addition, strategies to fight disease are poorly coordinated, and policies to halt the spread of HIV/AIDS are faltering.</font></p></td> </tr> <tr> <td align='left' valign='top'><a href='http://www.mdgmonitor.org/factsheets_00.cfm?c=MLI'>Read more... </a></td> </tr> <tr> <td align='right' valign='top'><p>Read related articles on <a href='http://news.google.com/archivesearch?hl=en&ned=us&ie=UTF-8&q=mali+%22millennium+development+goals%22'>Google News</a></p></td> </tr> <tr> <td align='right' valign='top'>&nbsp;</td> </tr> <tr> <td align='center'><table border='0' cellpadding='0' cellspacing='0'> <tr> <td align='right' valign='middle'><a href='http://www.un.org/'><img src='files/un_logo_small.png' alt='UN logo' border='0' /></a></td> <td align='left' valign='middle'><font color='#666666'>The  <a href="http://www.un.org/millenniumgoals/" target="_blank">Millennium Development Goals </a>(MDGs) were laid out by the leaders of the world in 2000. They include  halving extreme poverty, halting the spread of HIV/AIDS and   providing universal primary education, all by 2015.</font></td> </tr> </table></td> </tr> </table>]]></description>
			<styleUrl>#text_photo_banner</styleUrl>
			<Point>
				<coordinates>-7.995125991,12.64371145,0</coordinates>
			</Point>
		</Placemark>
		<Placemark>
			<name>Mauritania</name>
			<visibility>0</visibility>
			<address>http://www.mdgmonitor.org/factsheets_00.cfm?c=MRT</address>
			<Snippet maxLines="2"></Snippet>
			<description><![CDATA[<table width='350' border='0' cellpadding='3' cellspacing='0' bgcolor='#FFFFFF'> <tr> <td align='left'><table border='0' cellspacing='0' cellpadding='0'> <tr> <td rowspan='2' align='left' valign='middle'><a href='http://www.mdgmonitor.org/'><img src='files/mdg_logo.png' alt='mdp logo' border='0' /></a></td> <td align='left' valign='bottom'><font color='#00486D' size='6'><b>MDG</b>MONITOR</td> </tr> <tr> <td align='right' valign='top'><font color='#00486D' size='4'>Track. Learn. Support.</font></td> </tr> </table></td> </tr> <tr> <td align='left' valign='top' bgcolor='#003F7C'><font color='#FFFFFF' size='5'><strong>Mauritania</strong></font></td> </tr> <tr> <td align='left' valign='top'><table border='0' cellspacing='0' cellpadding='0'> <tr> <td align='left' valign='top'><a href='http://www.mdgmonitor.org/factsheets_00.cfm?c=MRT'><img src='files/mauritania.jpg' alt='image' width='200' border='0' align='left' /></a></td> <td align='left' valign='middle'><p><strong><font size='3'>Total Population (millions):</font> </strong>3.07</p><p><strong><font size'3'><a href='http://unstats.un.org/unsd/cdb/cdb_dict_xrxx.asp?def_code=63'>GDP</a> per capita (PPP US$):</font></strong> 2228 </p><p><font size='3'><strong>2006 <a href='http://hdr.undp.org/hdr2006/statistics/indices/default.cfm' target='_blank'>Human Development Index</a> (Rank 1-177):</strong> </font>153 </p></td> </tr> </table></td> </tr> <tr> <td align='left' valign='top'><font color='#003F7C' size='5'><strong>Health and the environment</strong></font></td> </tr> <tr> <td align='left' valign='top'><p><font color='#000000'>According to the United Nations Development Programme, Mauritania is one of the poorest nations, ranked 153rd out of 177. The two most significant challenges are health and the environment with a health system that is still unaffordable and of poor quality for many Mauritanians, and an environment characterized by increasingly frequent droughts and depletion of fish stocks. By 2006, the government’s “Strategic Framework for Combating Poverty” was entirely based on the MDGs.</font></p></td> </tr> <tr> <td align='left' valign='top'><a href='http://www.mdgmonitor.org/factsheets_00.cfm?c=MRT'>Read more... </a></td> </tr> <tr> <td align='right' valign='top'><p>Read related articles on <a href='http://news.google.com/archivesearch?hl=en&ned=us&ie=UTF-8&q=mauritania+%22millennium+development+goals%22'>Google News</a></p></td> </tr> <tr> <td align='right' valign='top'>&nbsp;</td> </tr> <tr> <td align='center'><table border='0' cellpadding='0' cellspacing='0'> <tr> <td align='right' valign='middle'><a href='http://www.un.org/'><img src='files/un_logo_small.png' alt='UN logo' border='0' /></a></td> <td align='left' valign='middle'><font color='#666666'>The  <a href="http://www.un.org/millenniumgoals/" target="_blank">Millennium Development Goals </a>(MDGs) were laid out by the leaders of the world in 2000. They include  halving extreme poverty, halting the spread of HIV/AIDS and   providing universal primary education, all by 2015.</font></td> </tr> </table></td> </tr> </table>]]></description>
			<styleUrl>#text_photo_banner</styleUrl>
			<Point>
				<coordinates>-15.979999,18.09,0</coordinates>
			</Point>
		</Placemark>
		<Placemark>
			<name>Mexico</name>
			<visibility>0</visibility>
			<address>http://www.mdgmonitor.org/factsheets_00.cfm?c=MEX</address>
			<Snippet maxLines="2"></Snippet>
			<description><![CDATA[<table width='350' border='0' cellpadding='3' cellspacing='0' bgcolor='#FFFFFF'> <tr> <td align='left'><table border='0' cellspacing='0' cellpadding='0'> <tr> <td rowspan='2' align='left' valign='middle'><a href='http://www.mdgmonitor.org/'><img src='files/mdg_logo.png' alt='mdp logo' border='0' /></a></td> <td align='left' valign='bottom'><font color='#00486D' size='6'><b>MDG</b>MONITOR</td> </tr> <tr> <td align='right' valign='top'><font color='#00486D' size='4'>Track. Learn. Support.</font></td> </tr> </table></td> </tr> <tr> <td align='left' valign='top' bgcolor='#003F7C'><font color='#FFFFFF' size='5'><strong>Mexico</strong></font></td> </tr> <tr> <td align='left' valign='top'><table border='0' cellspacing='0' cellpadding='0'> <tr> <td align='left' valign='top'><a href='http://www.mdgmonitor.org/factsheets_00.cfm?c=MEX'><img src='files/mexico.jpg' alt='image' width='200' border='0' align='left' /></a></td> <td align='left' valign='middle'><p><strong><font size='3'>Total Population (millions):</font> </strong>107.03</p><p><strong><font size'3'><a href='http://unstats.un.org/unsd/cdb/cdb_dict_xrxx.asp?def_code=63'>GDP</a> per capita (PPP US$):</font></strong> 10209 </p><p><font size='3'><strong>2006 <a href='http://hdr.undp.org/hdr2006/statistics/indices/default.cfm' target='_blank'>Human Development Index</a> (Rank 1-177):</strong> </font>53 </p></td> </tr> </table></td> </tr> <tr> <td align='left' valign='top'><font color='#003F7C' size='5'><strong>Focusing on the "red flags"</strong></font></td> </tr> <tr> <td align='left' valign='top'><p><font color='#000000'>Mexico is a middle-income country that has already met two of the MDGs and is on its way to reaching most of them by 2015.The 2006 report confirms that Mexico is making important progress in the area of poverty reduction, universal primary education, gender equality in schools, as well as transmitted diseases like HIV/AIDS, malaria and tuberculosis. The priority of the government is to move to a national MDG strategy focusing on Mexico’s ‘red flags’: gender equality in political life, child malnutrition, maternal mortality and the environment.</font></p></td> </tr> <tr> <td align='left' valign='top'><a href='http://www.mdgmonitor.org/factsheets_00.cfm?c=MEX'>Read more... </a></td> </tr> <tr> <td align='right' valign='top'><p>Read related articles on <a href='http://news.google.com/news?q=mexico+%22millennium+development+goals%22&hl=en&ned=us&ie=UTF-8'>Google News</a></p></td> </tr> <tr> <td align='right' valign='top'>&nbsp;</td> </tr> <tr> <td align='center'><table border='0' cellpadding='0' cellspacing='0'> <tr> <td align='right' valign='middle'><a href='http://www.un.org/'><img src='files/un_logo_small.png' alt='UN logo' border='0' /></a></td> <td align='left' valign='middle'><font color='#666666'>The  <a href="http://www.un.org/millenniumgoals/" target="_blank">Millennium Development Goals </a>(MDGs) were laid out by the leaders of the world in 2000. They include  halving extreme poverty, halting the spread of HIV/AIDS and   providing universal primary education, all by 2015.</font></td> </tr> </table></td> </tr> </table>]]></description>
			<styleUrl>#text_photo_banner</styleUrl>
			<Point>
				<coordinates>-99.139999,19.43,0</coordinates>
			</Point>
		</Placemark>
		<Placemark>
			<name>Moldova, Republic of</name>
			<visibility>0</visibility>
			<address>http://www.mdgmonitor.org/factsheets_00.cfm?c=MDA</address>
			<Snippet maxLines="2"></Snippet>
			<description><![CDATA[<table width='350' border='0' cellpadding='3' cellspacing='0' bgcolor='#FFFFFF'> <tr> <td align='left'><table border='0' cellspacing='0' cellpadding='0'> <tr> <td rowspan='2' align='left' valign='middle'><a href='http://www.mdgmonitor.org/'><img src='files/mdg_logo.png' alt='mdp logo' border='0' /></a></td> <td align='left' valign='bottom'><font color='#00486D' size='6'><b>MDG</b>MONITOR</td> </tr> <tr> <td align='right' valign='top'><font color='#00486D' size='4'>Track. Learn. Support.</font></td> </tr> </table></td> </tr> <tr> <td align='left' valign='top' bgcolor='#003F7C'><font color='#FFFFFF' size='5'><strong>Moldova, Republic of</strong></font></td> </tr> <tr> <td align='left' valign='top'><table border='0' cellspacing='0' cellpadding='0'> <tr> <td align='left' valign='top'><a href='http://www.mdgmonitor.org/factsheets_00.cfm?c=MDA'><img src='files/moldova.jpg' alt='image' width='200' border='0' align='left' /></a></td> <td align='left' valign='middle'><p><strong><font size='3'>Total Population (millions):</font> </strong>4.21</p><p><strong><font size'3'><a href='http://unstats.un.org/unsd/cdb/cdb_dict_xrxx.asp?def_code=63'>GDP</a> per capita (PPP US$):</font></strong> 1908 </p><p><font size='3'><strong>2006 <a href='http://hdr.undp.org/hdr2006/statistics/indices/default.cfm' target='_blank'>Human Development Index</a> (Rank 1-177):</strong> </font>114 </p></td> </tr> </table></td> </tr> <tr> <td align='left' valign='top'><font color='#003F7C' size='5'><strong>Robust growth rates</strong></font></td> </tr> <tr> <td align='left' valign='top'><p><font color='#000000'>Moldova has made significant progress toward achieving Goal 1. The poverty rate (measured as the proportion of the population living on less than $2.15 per person per day) decreased from 64.5 percent in 2000 to 27.6 percent in 2005, an advance that is linked to the country’s robust growth rates over the last six years. Good progress has also been made towards reducing child and maternal mortality rates. However achieving the objective on HIV/AIDS is a serious challenge. In 2006, the incidence of HIV/AIDS in Moldova had more than doubled as compared to 2000.</font></p></td> </tr> <tr> <td align='left' valign='top'><a href='http://www.mdgmonitor.org/factsheets_00.cfm?c=MDA'>Read more... </a></td> </tr> <tr> <td align='right' valign='top'><p>Read related articles on <a href='http://news.google.com/archivesearch?hl=en&ned=us&q=moldova+%22millennium+development+goals%22&ie=UTF-8'>Google News</a></p></td> </tr> <tr> <td align='right' valign='top'>&nbsp;</td> </tr> <tr> <td align='center'><table border='0' cellpadding='0' cellspacing='0'> <tr> <td align='right' valign='middle'><a href='http://www.un.org/'><img src='files/un_logo_small.png' alt='UN logo' border='0' /></a></td> <td align='left' valign='middle'><font color='#666666'>The  <a href="http://www.un.org/millenniumgoals/" target="_blank">Millennium Development Goals </a>(MDGs) were laid out by the leaders of the world in 2000. They include  halving extreme poverty, halting the spread of HIV/AIDS and   providing universal primary education, all by 2015.</font></td> </tr> </table></td> </tr> </table>]]></description>
			<styleUrl>#text_photo_banner</styleUrl>
			<Point>
				<coordinates>28.829999,47.02999800000001,0</coordinates>
			</Point>
		</Placemark>
		<Placemark>
			<name>Mongolia</name>
			<visibility>0</visibility>
			<address>http://www.mdgmonitor.org/factsheets_00.cfm?c=MNG</address>
			<Snippet maxLines="2"></Snippet>
			<description><![CDATA[<table width='350' border='0' cellpadding='3' cellspacing='0' bgcolor='#FFFFFF'> <tr> <td align='left'><table border='0' cellspacing='0' cellpadding='0'> <tr> <td rowspan='2' align='left' valign='middle'><a href='http://www.mdgmonitor.org/'><img src='files/mdg_logo.png' alt='mdp logo' border='0' /></a></td> <td align='left' valign='bottom'><font color='#00486D' size='6'><b>MDG</b>MONITOR</td> </tr> <tr> <td align='right' valign='top'><font color='#00486D' size='4'>Track. Learn. Support.</font></td> </tr> </table></td> </tr> <tr> <td align='left' valign='top' bgcolor='#003F7C'><font color='#FFFFFF' size='5'><strong>Mongolia</strong></font></td> </tr> <tr> <td align='left' valign='top'><table border='0' cellspacing='0' cellpadding='0'> <tr> <td align='left' valign='top'><a href='http://www.mdgmonitor.org/factsheets_00.cfm?c=MNG'><img src='files/mongolia.jpg' alt='image' width='200' border='0' align='left' /></a></td> <td align='left' valign='middle'><p><strong><font size='3'>Total Population (millions):</font> </strong>2.65</p><p><strong><font size'3'><a href='http://unstats.un.org/unsd/cdb/cdb_dict_xrxx.asp?def_code=63'>GDP</a> per capita (PPP US$):</font></strong> 2250 </p><p><font size='3'><strong>2006 <a href='http://hdr.undp.org/hdr2006/statistics/indices/default.cfm' target='_blank'>Human Development Index</a> (Rank 1-177):</strong> </font>116 </p></td> </tr> </table></td> </tr> <tr> <td align='left' valign='top'><font color='#003F7C' size='5'><strong>An incomplete transition</strong></font></td> </tr> <tr> <td align='left' valign='top'><p><font color='#000000'>After more than a decade of transition, Mongolia faces a number of pressing development challenges. As a result of the early years of the transition, when incomes and social spending plummeted and unemployment and inflation increased, poverty remains widespread. Mongolia has, however, made good progress toward improving maternal health and has already achieved the fourth goal: reducing child mortality.  Most challenging among the remaining goals are those relating to income poverty, tuberculosis, air pollution, safe drinking water and housing, and gender equality at the political decision-making level.</font></p></td> </tr> <tr> <td align='left' valign='top'><a href='http://www.mdgmonitor.org/factsheets_00.cfm?c=MNG'>Read more... </a></td> </tr> <tr> <td align='right' valign='top'><p>Read related articles on <a href='http://news.google.com/archivesearch?hl=en&ned=us&ie=UTF-8&q=Mongolia+%22millennium+development+goals%22'>Google News</a></p></td> </tr> <tr> <td align='right' valign='top'>&nbsp;</td> </tr> <tr> <td align='center'><table border='0' cellpadding='0' cellspacing='0'> <tr> <td align='right' valign='middle'><a href='http://www.un.org/'><img src='files/un_logo_small.png' alt='UN logo' border='0' /></a></td> <td align='left' valign='middle'><font color='#666666'>The  <a href="http://www.un.org/millenniumgoals/" target="_blank">Millennium Development Goals </a>(MDGs) were laid out by the leaders of the world in 2000. They include  halving extreme poverty, halting the spread of HIV/AIDS and   providing universal primary education, all by 2015.</font></td> </tr> </table></td> </tr> </table>]]></description>
			<styleUrl>#text_photo_banner</styleUrl>
			<Point>
				<coordinates>106.910003,47.93,0</coordinates>
			</Point>
		</Placemark>
		<Placemark>
			<name>Montenegro</name>
			<visibility>0</visibility>
			<address>http://www.mdgmonitor.org/factsheets_00.cfm?c=MON</address>
			<Snippet maxLines="2"></Snippet>
			<description><![CDATA[<table width='350' border='0' cellpadding='3' cellspacing='0' bgcolor='#FFFFFF'> <tr> <td align='left'><table border='0' cellspacing='0' cellpadding='0'> <tr> <td rowspan='2' align='left' valign='middle'><a href='http://www.mdgmonitor.org/'><img src='files/mdg_logo.png' alt='mdp logo' border='0' /></a></td> <td align='left' valign='bottom'><font color='#00486D' size='6'><b>MDG</b>MONITOR</td> </tr> <tr> <td align='right' valign='top'><font color='#00486D' size='4'>Track. Learn. Support.</font></td> </tr> </table></td> </tr> <tr> <td align='left' valign='top' bgcolor='#003F7C'><font color='#FFFFFF' size='5'><strong>Montenegro</strong></font></td> </tr> <tr> <td align='left' valign='top'><table border='0' cellspacing='0' cellpadding='0'> <tr> <td align='left' valign='top'><a href='http://www.mdgmonitor.org/factsheets_00.cfm?c=MON'><img src='files/montenegro.jpg' alt='image' width='200' border='0' align='left' /></a></td> <td align='left' valign='middle'><p><strong><font size='3'>Total Population (millions):</font> </strong>NA</p><p><strong><font size'3'><a href='http://unstats.un.org/unsd/cdb/cdb_dict_xrxx.asp?def_code=63'>GDP</a> per capita (PPP US$):</font></strong> NA </p><p><font size='3'><strong>2006 <a href='http://hdr.undp.org/hdr2006/statistics/indices/default.cfm' target='_blank'>Human Development Index</a> (Rank 1-177):</strong> </font>NA </p></td> </tr> </table></td> </tr> <tr> <td align='left' valign='top'><font color='#003F7C' size='5'><strong>A dynamic new country</strong></font></td> </tr> <tr> <td align='left' valign='top'><p><font color='#000000'>Montenegro is a country with a small, dynamic, self-sustaining economy and a wealth of natural resources that could bolster the economy in the medium term and provide the financial resources to address social issues. The country’s main development challenges include the fight against corruption, governance, social inclusion of all vulnerable groups and achieving a balance between economic development and the exploitation of natural resources.</font></p></td> </tr> <tr> <td align='left' valign='top'><a href='http://www.mdgmonitor.org/factsheets_00.cfm?c=MON'>Read more... </a></td> </tr> <tr> <td align='right' valign='top'><p>Read related articles on <a href='http://news.google.com/archivesearch?hl=en&ned=us&ie=UTF-8&q=Montenegro+%22millennium+development+goals%22'>Google News</a></p></td> </tr> <tr> <td align='right' valign='top'>&nbsp;</td> </tr> <tr> <td align='center'><table border='0' cellpadding='0' cellspacing='0'> <tr> <td align='right' valign='middle'><a href='http://www.un.org/'><img src='files/un_logo_small.png' alt='UN logo' border='0' /></a></td> <td align='left' valign='middle'><font color='#666666'>The  <a href="http://www.un.org/millenniumgoals/" target="_blank">Millennium Development Goals </a>(MDGs) were laid out by the leaders of the world in 2000. They include  halving extreme poverty, halting the spread of HIV/AIDS and   providing universal primary education, all by 2015.</font></td> </tr> </table></td> </tr> </table>]]></description>
			<styleUrl>#text_photo_banner</styleUrl>
			<Point>
				<coordinates>19.268646,42.442575,0</coordinates>
			</Point>
		</Placemark>
		<Placemark>
			<name>Morocco</name>
			<visibility>0</visibility>
			<address>http://www.mdgmonitor.org/factsheets_00.cfm?c=MAR</address>
			<Snippet maxLines="2"></Snippet>
			<description><![CDATA[<table width='350' border='0' cellpadding='3' cellspacing='0' bgcolor='#FFFFFF'> <tr> <td align='left'><table border='0' cellspacing='0' cellpadding='0'> <tr> <td rowspan='2' align='left' valign='middle'><a href='http://www.mdgmonitor.org/'><img src='files/mdg_logo.png' alt='mdp logo' border='0' /></a></td> <td align='left' valign='bottom'><font color='#00486D' size='6'><b>MDG</b>MONITOR</td> </tr> <tr> <td align='right' valign='top'><font color='#00486D' size='4'>Track. Learn. Support.</font></td> </tr> </table></td> </tr> <tr> <td align='left' valign='top' bgcolor='#003F7C'><font color='#FFFFFF' size='5'><strong>Morocco</strong></font></td> </tr> <tr> <td align='left' valign='top'><table border='0' cellspacing='0' cellpadding='0'> <tr> <td align='left' valign='top'><a href='http://www.mdgmonitor.org/factsheets_00.cfm?c=MAR'><img src='files/morocco.jpg' alt='image' width='200' border='0' align='left' /></a></td> <td align='left' valign='middle'><p><strong><font size='3'>Total Population (millions):</font> </strong>31.48</p><p><strong><font size'3'><a href='http://unstats.un.org/unsd/cdb/cdb_dict_xrxx.asp?def_code=63'>GDP</a> per capita (PPP US$):</font></strong> 4421 </p><p><font size='3'><strong>2006 <a href='http://hdr.undp.org/hdr2006/statistics/indices/default.cfm' target='_blank'>Human Development Index</a> (Rank 1-177):</strong> </font>123 </p></td> </tr> </table></td> </tr> <tr> <td align='left' valign='top'><font color='#003F7C' size='5'><strong>Strengthening health and education</strong></font></td> </tr> <tr> <td align='left' valign='top'><p><font color='#000000'>Morocco's 2005 MDG report shows that 25% of the population can be considered "economically vulnerable". The country's literacy rates have increased from 22% to 60% between 1960 and 2005 but the quality of the education remains a challenge. Similarly, though the average life expectancy now anounts to around 70 years, only 17% of the population benefits from health coverage.</font></p></td> </tr> <tr> <td align='left' valign='top'><a href='http://www.mdgmonitor.org/factsheets_00.cfm?c=MAR'>Read more... </a></td> </tr> <tr> <td align='right' valign='top'><p>Read related articles on <a href='http://news.google.com/archivesearch?hl=en&ned=us&ie=UTF-8&q=Morocco+%22millennium+development+goals%22'>Google News</a></p></td> </tr> <tr> <td align='right' valign='top'>&nbsp;</td> </tr> <tr> <td align='center'><table border='0' cellpadding='0' cellspacing='0'> <tr> <td align='right' valign='middle'><a href='http://www.un.org/'><img src='files/un_logo_small.png' alt='UN logo' border='0' /></a></td> <td align='left' valign='middle'><font color='#666666'>The  <a href="http://www.un.org/millenniumgoals/" target="_blank">Millennium Development Goals </a>(MDGs) were laid out by the leaders of the world in 2000. They include  halving extreme poverty, halting the spread of HIV/AIDS and   providing universal primary education, all by 2015.</font></td> </tr> </table></td> </tr> </table>]]></description>
			<styleUrl>#text_photo_banner</styleUrl>
			<Point>
				<coordinates>-6.84,34.02,0</coordinates>
			</Point>
		</Placemark>
		<Placemark>
			<name>Mozambique</name>
			<visibility>0</visibility>
			<address>http://www.mdgmonitor.org/factsheets_00.cfm?c=MOZ</address>
			<Snippet maxLines="2"></Snippet>
			<description><![CDATA[<table width='350' border='0' cellpadding='3' cellspacing='0' bgcolor='#FFFFFF'> <tr> <td align='left'><table border='0' cellspacing='0' cellpadding='0'> <tr> <td rowspan='2' align='left' valign='middle'><a href='http://www.mdgmonitor.org/'><img src='files/mdg_logo.png' alt='mdp logo' border='0' /></a></td> <td align='left' valign='bottom'><font color='#00486D' size='6'><b>MDG</b>MONITOR</td> </tr> <tr> <td align='right' valign='top'><font color='#00486D' size='4'>Track. Learn. Support.</font></td> </tr> </table></td> </tr> <tr> <td align='left' valign='top' bgcolor='#003F7C'><font color='#FFFFFF' size='5'><strong>Mozambique</strong></font></td> </tr> <tr> <td align='left' valign='top'><table border='0' cellspacing='0' cellpadding='0'> <tr> <td align='left' valign='top'><a href='http://www.mdgmonitor.org/factsheets_00.cfm?c=MOZ'><img src='files/mozambique.jpg' alt='image' width='200' border='0' align='left' /></a></td> <td align='left' valign='middle'><p><strong><font size='3'>Total Population (millions):</font> </strong>19.79</p><p><strong><font size'3'><a href='http://unstats.un.org/unsd/cdb/cdb_dict_xrxx.asp?def_code=63'>GDP</a> per capita (PPP US$):</font></strong> 1364 </p><p><font size='3'><strong>2006 <a href='http://hdr.undp.org/hdr2006/statistics/indices/default.cfm' target='_blank'>Human Development Index</a> (Rank 1-177):</strong> </font>168 </p></td> </tr> </table></td> </tr> <tr> <td align='left' valign='top'><font color='#003F7C' size='5'><strong>A mixed record</strong></font></td> </tr> <tr> <td align='left' valign='top'><p><font color='#000000'>While some MDG progress is evident in Mozambique, the situation is not improving fast enough. For instance, Mozambique is on course to halve the proportion of people living in extreme poverty by 2015 but is unlikely to halve the proportion in hunger because of drought-related constraints. Similarly, while reducing child mortality and improving maternal health objectives are on track, it is unlikely that universal primary education, gender equality, halting and reversing the spread of HIV/AIDS and ensuring environmental sustainability shall be met by the target year of 2015.</font></p></td> </tr> <tr> <td align='left' valign='top'><a href='http://www.mdgmonitor.org/factsheets_00.cfm?c=MOZ'>Read more... </a></td> </tr> <tr> <td align='right' valign='top'><p>Read related articles on <a href='http://news.google.com/news?hl=en&ned=us&ie=UTF-8&q=Mozambique+%22millennium+development+goals%22'>Google News</a></p></td> </tr> <tr> <td align='right' valign='top'>&nbsp;</td> </tr> <tr> <td align='center'><table border='0' cellpadding='0' cellspacing='0'> <tr> <td align='right' valign='middle'><a href='http://www.un.org/'><img src='files/un_logo_small.png' alt='UN logo' border='0' /></a></td> <td align='left' valign='middle'><font color='#666666'>The  <a href="http://www.un.org/millenniumgoals/" target="_blank">Millennium Development Goals </a>(MDGs) were laid out by the leaders of the world in 2000. They include  halving extreme poverty, halting the spread of HIV/AIDS and   providing universal primary education, all by 2015.</font></td> </tr> </table></td> </tr> </table>]]></description>
			<styleUrl>#text_photo_banner</styleUrl>
			<Point>
				<coordinates>32.57302057,-25.96925931,0</coordinates>
			</Point>
		</Placemark>
		<Placemark>
			<name>Myanmar</name>
			<visibility>0</visibility>
			<address>http://www.mdgmonitor.org/factsheets_00.cfm?c=MMR</address>
			<Snippet maxLines="2"></Snippet>
			<description><![CDATA[<table width='350' border='0' cellpadding='3' cellspacing='0' bgcolor='#FFFFFF'> <tr> <td align='left'><table border='0' cellspacing='0' cellpadding='0'> <tr> <td rowspan='2' align='left' valign='middle'><a href='http://www.mdgmonitor.org/'><img src='files/mdg_logo.png' alt='mdp logo' border='0' /></a></td> <td align='left' valign='bottom'><font color='#00486D' size='6'><b>MDG</b>MONITOR</td> </tr> <tr> <td align='right' valign='top'><font color='#00486D' size='4'>Track. Learn. Support.</font></td> </tr> </table></td> </tr> <tr> <td align='left' valign='top' bgcolor='#003F7C'><font color='#FFFFFF' size='5'><strong>Myanmar</strong></font></td> </tr> <tr> <td align='left' valign='top'><table border='0' cellspacing='0' cellpadding='0'> <tr> <td align='left' valign='top'><a href='http://www.mdgmonitor.org/factsheets_00.cfm?c=MMR'><img src='files/myanmar.jpg' alt='image' width='200' border='0' align='left' /></a></td> <td align='left' valign='middle'><p><strong><font size='3'>Total Population (millions):</font> </strong>50.52</p><p><strong><font size'3'><a href='http://unstats.un.org/unsd/cdb/cdb_dict_xrxx.asp?def_code=63'>GDP</a> per capita (PPP US$):</font></strong> NA </p><p><font size='3'><strong>2006 <a href='http://hdr.undp.org/hdr2006/statistics/indices/default.cfm' target='_blank'>Human Development Index</a> (Rank 1-177):</strong> </font>130 </p></td> </tr> </table></td> </tr> <tr> <td align='left' valign='top'><font color='#003F7C' size='5'><strong>Lack of data</strong></font></td> </tr> <tr> <td align='left' valign='top'><p><font color='#000000'>To halt the spread of HIV/AIDS, tuberculosis and malaria, Myanmar’s Ministry of Health has been cooperating with the United Nations system and national and international NGOs. Although progress has been made towards achieving the Goals related to health and education, lack of routine data collection combined with a weak monitoring and evaluation system makes it difficult to measure progress – particularly in poverty reduction. Another challenge is that assistance from organizations such as the World Bank, the International Monetary Fund, and the Asian Development Bank has been suspended since 1988, and official development assistance is marginal.</font></p></td> </tr> <tr> <td align='left' valign='top'><a href='http://www.mdgmonitor.org/factsheets_00.cfm?c=MMR'>Read more... </a></td> </tr> <tr> <td align='right' valign='top'><p>Read related articles on <a href='http://news.google.com/news?hl=en&ned=us&ie=UTF-8&q=Myanmar+%22millennium+development+goals%22'>Google News</a></p></td> </tr> <tr> <td align='right' valign='top'>&nbsp;</td> </tr> <tr> <td align='center'><table border='0' cellpadding='0' cellspacing='0'> <tr> <td align='right' valign='middle'><a href='http://www.un.org/'><img src='files/un_logo_small.png' alt='UN logo' border='0' /></a></td> <td align='left' valign='middle'><font color='#666666'>The  <a href="http://www.un.org/millenniumgoals/" target="_blank">Millennium Development Goals </a>(MDGs) were laid out by the leaders of the world in 2000. They include  halving extreme poverty, halting the spread of HIV/AIDS and   providing universal primary education, all by 2015.</font></td> </tr> </table></td> </tr> </table>]]></description>
			<styleUrl>#text_photo_banner</styleUrl>
			<Point>
				<coordinates>96.150001,16.79,0</coordinates>
			</Point>
		</Placemark>
		<Placemark>
			<name>Namibia</name>
			<visibility>0</visibility>
			<address>http://www.mdgmonitor.org/factsheets_00.cfm?c=NAM</address>
			<Snippet maxLines="2"></Snippet>
			<description><![CDATA[<table width='350' border='0' cellpadding='3' cellspacing='0' bgcolor='#FFFFFF'> <tr> <td align='left'><table border='0' cellspacing='0' cellpadding='0'> <tr> <td rowspan='2' align='left' valign='middle'><a href='http://www.mdgmonitor.org/'><img src='files/mdg_logo.png' alt='mdp logo' border='0' /></a></td> <td align='left' valign='bottom'><font color='#00486D' size='6'><b>MDG</b>MONITOR</td> </tr> <tr> <td align='right' valign='top'><font color='#00486D' size='4'>Track. Learn. Support.</font></td> </tr> </table></td> </tr> <tr> <td align='left' valign='top' bgcolor='#003F7C'><font color='#FFFFFF' size='5'><strong>Namibia</strong></font></td> </tr> <tr> <td align='left' valign='top'><table border='0' cellspacing='0' cellpadding='0'> <tr> <td align='left' valign='top'><a href='http://www.mdgmonitor.org/factsheets_00.cfm?c=NAM'><img src='files/namibia.jpg' alt='image' width='200' border='0' align='left' /></a></td> <td align='left' valign='middle'><p><strong><font size='3'>Total Population (millions):</font> </strong>2.03</p><p><strong><font size'3'><a href='http://unstats.un.org/unsd/cdb/cdb_dict_xrxx.asp?def_code=63'>GDP</a> per capita (PPP US$):</font></strong> 7803 </p><p><font size='3'><strong>2006 <a href='http://hdr.undp.org/hdr2006/statistics/indices/default.cfm' target='_blank'>Human Development Index</a> (Rank 1-177):</strong> </font>125 </p></td> </tr> </table></td> </tr> <tr> <td align='left' valign='top'><font color='#003F7C' size='5'><strong>Developing human capital</strong></font></td> </tr> <tr> <td align='left' valign='top'><p><font color='#000000'>Current priorities in Namibia include reducing poverty and promoting social equality through programmes to accelerate economic growth, create employment, and stimulate human capital development. In 1990, the democratically elected government inherited a country rich in diamonds, minerals, and other natural resources but with immense structural inequalities. Because of this, Namibia today may be classified as a middle-income country, but poverty and food insecurity are widespread, especially in the northern rural regions; the distribution of wealth is among the most unequal in the world; and the rate of formal sector unemployment is over 30 per cent, and even higher for youth.</font></p></td> </tr> <tr> <td align='left' valign='top'><a href='http://www.mdgmonitor.org/factsheets_00.cfm?c=NAM'>Read more... </a></td> </tr> <tr> <td align='right' valign='top'><p>Read related articles on <a href='http://news.google.com/archivesearch?hl=en&ned=us&ie=UTF-8&q=Namibia+%22millennium+development+goals%22'>Google News</a></p></td> </tr> <tr> <td align='right' valign='top'>&nbsp;</td> </tr> <tr> <td align='center'><table border='0' cellpadding='0' cellspacing='0'> <tr> <td align='right' valign='middle'><a href='http://www.un.org/'><img src='files/un_logo_small.png' alt='UN logo' border='0' /></a></td> <td align='left' valign='middle'><font color='#666666'>The  <a href="http://www.un.org/millenniumgoals/" target="_blank">Millennium Development Goals </a>(MDGs) were laid out by the leaders of the world in 2000. They include  halving extreme poverty, halting the spread of HIV/AIDS and   providing universal primary education, all by 2015.</font></td> </tr> </table></td> </tr> </table>]]></description>
			<styleUrl>#text_photo_banner</styleUrl>
			<Point>
				<coordinates>17.082024,-22.55915,0</coordinates>
			</Point>
		</Placemark>
		<Placemark>
			<name>Nepal</name>
			<visibility>0</visibility>
			<address>http://www.mdgmonitor.org/factsheets_00.cfm?c=NPL</address>
			<Snippet maxLines="2"></Snippet>
			<description><![CDATA[<table width='350' border='0' cellpadding='3' cellspacing='0' bgcolor='#FFFFFF'> <tr> <td align='left'><table border='0' cellspacing='0' cellpadding='0'> <tr> <td rowspan='2' align='left' valign='middle'><a href='http://www.mdgmonitor.org/'><img src='files/mdg_logo.png' alt='mdp logo' border='0' /></a></td> <td align='left' valign='bottom'><font color='#00486D' size='6'><b>MDG</b>MONITOR</td> </tr> <tr> <td align='right' valign='top'><font color='#00486D' size='4'>Track. Learn. Support.</font></td> </tr> </table></td> </tr> <tr> <td align='left' valign='top' bgcolor='#003F7C'><font color='#FFFFFF' size='5'><strong>Nepal</strong></font></td> </tr> <tr> <td align='left' valign='top'><table border='0' cellspacing='0' cellpadding='0'> <tr> <td align='left' valign='top'><a href='http://www.mdgmonitor.org/factsheets_00.cfm?c=NPL'><img src='files/nepal.jpg' alt='image' width='200' border='0' align='left' /></a></td> <td align='left' valign='middle'><p><strong><font size='3'>Total Population (millions):</font> </strong>27.13</p><p><strong><font size'3'><a href='http://unstats.un.org/unsd/cdb/cdb_dict_xrxx.asp?def_code=63'>GDP</a> per capita (PPP US$):</font></strong> 1529 </p><p><font size='3'><strong>2006 <a href='http://hdr.undp.org/hdr2006/statistics/indices/default.cfm' target='_blank'>Human Development Index</a> (Rank 1-177):</strong> </font>138 </p></td> </tr> </table></td> </tr> <tr> <td align='left' valign='top'><font color='#003F7C' size='5'><strong>On track to accomplish most MDGs</strong></font></td> </tr> <tr> <td align='left' valign='top'><p><font color='#000000'>Nepal, despite its 12-year conflict, should be able to meet all the goals, except universal primary education and HIV/AIDS. Past efforts to monitor MDG progress are now leading to concrete outcomes: the government is developing a package of initiatives to support national and local development strategies based on the MDGs.</font></p></td> </tr> <tr> <td align='left' valign='top'><a href='http://www.mdgmonitor.org/factsheets_00.cfm?c=NPL'>Read more... </a></td> </tr> <tr> <td align='right' valign='top'><p>Read related articles on <a href='http://news.google.com/archivesearch?q=Nepal+%22millennium+development+goals%22&hl=en&ned=us&ie=UTF-8'>Google News</a></p></td> </tr> <tr> <td align='right' valign='top'>&nbsp;</td> </tr> <tr> <td align='center'><table border='0' cellpadding='0' cellspacing='0'> <tr> <td align='right' valign='middle'><a href='http://www.un.org/'><img src='files/un_logo_small.png' alt='UN logo' border='0' /></a></td> <td align='left' valign='middle'><font color='#666666'>The  <a href="http://www.un.org/millenniumgoals/" target="_blank">Millennium Development Goals </a>(MDGs) were laid out by the leaders of the world in 2000. They include  halving extreme poverty, halting the spread of HIV/AIDS and   providing universal primary education, all by 2015.</font></td> </tr> </table></td> </tr> </table>]]></description>
			<styleUrl>#text_photo_banner</styleUrl>
			<Point>
				<coordinates>85.32348800000001,27.698079,0</coordinates>
			</Point>
		</Placemark>
		<Placemark>
			<name>Nicaragua</name>
			<visibility>0</visibility>
			<address>http://www.mdgmonitor.org/factsheets_00.cfm?c=NIC</address>
			<Snippet maxLines="2"></Snippet>
			<description><![CDATA[<table width='350' border='0' cellpadding='3' cellspacing='0' bgcolor='#FFFFFF'> <tr> <td align='left'><table border='0' cellspacing='0' cellpadding='0'> <tr> <td rowspan='2' align='left' valign='middle'><a href='http://www.mdgmonitor.org/'><img src='files/mdg_logo.png' alt='mdp logo' border='0' /></a></td> <td align='left' valign='bottom'><font color='#00486D' size='6'><b>MDG</b>MONITOR</td> </tr> <tr> <td align='right' valign='top'><font color='#00486D' size='4'>Track. Learn. Support.</font></td> </tr> </table></td> </tr> <tr> <td align='left' valign='top' bgcolor='#003F7C'><font color='#FFFFFF' size='5'><strong>Nicaragua</strong></font></td> </tr> <tr> <td align='left' valign='top'><table border='0' cellspacing='0' cellpadding='0'> <tr> <td align='left' valign='top'><a href='http://www.mdgmonitor.org/factsheets_00.cfm?c=NIC'><img src='files/nicaragua.jpg' alt='image' width='200' border='0' align='left' /></a></td> <td align='left' valign='middle'><p><strong><font size='3'>Total Population (millions):</font> </strong>5.49</p><p><strong><font size'3'><a href='http://unstats.un.org/unsd/cdb/cdb_dict_xrxx.asp?def_code=63'>GDP</a> per capita (PPP US$):</font></strong> 3680 </p><p><font size='3'><strong>2006 <a href='http://hdr.undp.org/hdr2006/statistics/indices/default.cfm' target='_blank'>Human Development Index</a> (Rank 1-177):</strong> </font>112 </p></td> </tr> </table></td> </tr> <tr> <td align='left' valign='top'><font color='#003F7C' size='5'><strong>Dividing lines</strong></font></td> </tr> <tr> <td align='left' valign='top'><p><font color='#000000'>Nicaragua has "mainstreamed" the MDGs, which means that the Goals have been incorporated in every aspect of the national development strategy.  The current government plans to emphasize poverty reduction and the fight against hunger through initiatives such as the Zero Hunger programme. Nonetheless, the country still suffers from profound geographical, ethnic, and gender inequalities and levels of income.</font></p></td> </tr> <tr> <td align='left' valign='top'><a href='http://www.mdgmonitor.org/factsheets_00.cfm?c=NIC'>Read more... </a></td> </tr> <tr> <td align='right' valign='top'><p>Read related articles on <a href='http://news.google.com/news?hl=en&ned=us&ie=UTF-8&q=Nicaragua+%22millennium+development+goals%22'>Google News</a></p></td> </tr> <tr> <td align='right' valign='top'>&nbsp;</td> </tr> <tr> <td align='center'><table border='0' cellpadding='0' cellspacing='0'> <tr> <td align='right' valign='middle'><a href='http://www.un.org/'><img src='files/un_logo_small.png' alt='UN logo' border='0' /></a></td> <td align='left' valign='middle'><font color='#666666'>The  <a href="http://www.un.org/millenniumgoals/" target="_blank">Millennium Development Goals </a>(MDGs) were laid out by the leaders of the world in 2000. They include  halving extreme poverty, halting the spread of HIV/AIDS and   providing universal primary education, all by 2015.</font></td> </tr> </table></td> </tr> </table>]]></description>
			<styleUrl>#text_photo_banner</styleUrl>
			<Point>
				<coordinates>-86.26999600000002,12.149999,0</coordinates>
			</Point>
		</Placemark>
		<Placemark>
			<name>Niger</name>
			<visibility>0</visibility>
			<address>http://www.mdgmonitor.org/factsheets_00.cfm?c=NER</address>
			<Snippet maxLines="2"></Snippet>
			<description><![CDATA[<table width='350' border='0' cellpadding='3' cellspacing='0' bgcolor='#FFFFFF'> <tr> <td align='left'><table border='0' cellspacing='0' cellpadding='0'> <tr> <td rowspan='2' align='left' valign='middle'><a href='http://www.mdgmonitor.org/'><img src='files/mdg_logo.png' alt='mdp logo' border='0' /></a></td> <td align='left' valign='bottom'><font color='#00486D' size='6'><b>MDG</b>MONITOR</td> </tr> <tr> <td align='right' valign='top'><font color='#00486D' size='4'>Track. Learn. Support.</font></td> </tr> </table></td> </tr> <tr> <td align='left' valign='top' bgcolor='#003F7C'><font color='#FFFFFF' size='5'><strong>Niger</strong></font></td> </tr> <tr> <td align='left' valign='top'><table border='0' cellspacing='0' cellpadding='0'> <tr> <td align='left' valign='top'><a href='http://www.mdgmonitor.org/factsheets_00.cfm?c=NER'><img src='files/niger.jpg' alt='image' width='200' border='0' align='left' /></a></td> <td align='left' valign='middle'><p><strong><font size='3'>Total Population (millions):</font> </strong>13.96</p><p><strong><font size'3'><a href='http://unstats.un.org/unsd/cdb/cdb_dict_xrxx.asp?def_code=63'>GDP</a> per capita (PPP US$):</font></strong> 800 </p><p><font size='3'><strong>2006 <a href='http://hdr.undp.org/hdr2006/statistics/indices/default.cfm' target='_blank'>Human Development Index</a> (Rank 1-177):</strong> </font>177 </p></td> </tr> </table></td> </tr> <tr> <td align='left' valign='top'><font color='#003F7C' size='5'><strong>An ambitious set of goals</strong></font></td> </tr> <tr> <td align='left' valign='top'><p><font color='#000000'>Accelerated poverty reduction defines Niger’s steps towards accomplishing the MDGs. By 2012, the African country aims to: reduce the poverty rate to 42 percent; lower the malnutrition level to 24 percent; raise primary school enrolment to 94 percent; increase the literacy rate to 45 percent; drop the younger-than-five mortality rate to 108 in 1,000; bring the maternal mortality ratio to 200 per 100,000 live births; maintain an HIV/AIDS prevalence rate at less than 0.7 percent; offer improved drinking water to 80 percent of the population; and turn at least 8 per cent of national territory into protected lands.</font></p></td> </tr> <tr> <td align='left' valign='top'><a href='http://www.mdgmonitor.org/factsheets_00.cfm?c=NER'>Read more... </a></td> </tr> <tr> <td align='right' valign='top'><p>Read related articles on <a href='http://news.google.com/news?hl=en&ned=us&ie=UTF-8&q=Niger+%22millennium+development+goals%22'>Google News</a></p></td> </tr> <tr> <td align='right' valign='top'>&nbsp;</td> </tr> <tr> <td align='center'><table border='0' cellpadding='0' cellspacing='0'> <tr> <td align='right' valign='middle'><a href='http://www.un.org/'><img src='files/un_logo_small.png' alt='UN logo' border='0' /></a></td> <td align='left' valign='middle'><font color='#666666'>The  <a href="http://www.un.org/millenniumgoals/" target="_blank">Millennium Development Goals </a>(MDGs) were laid out by the leaders of the world in 2000. They include  halving extreme poverty, halting the spread of HIV/AIDS and   providing universal primary education, all by 2015.</font></td> </tr> </table></td> </tr> </table>]]></description>
			<styleUrl>#text_photo_banner</styleUrl>
			<Point>
				<coordinates>2.119999,13.52,0</coordinates>
			</Point>
		</Placemark>
		<Placemark>
			<name>Niue</name>
			<visibility>0</visibility>
			<address>http://www.mdgmonitor.org/factsheets_00.cfm?c=NUE</address>
			<Snippet maxLines="2"></Snippet>
			<description><![CDATA[<table width='350' border='0' cellpadding='3' cellspacing='0' bgcolor='#FFFFFF'> <tr> <td align='left'><table border='0' cellspacing='0' cellpadding='0'> <tr> <td rowspan='2' align='left' valign='middle'><a href='http://www.mdgmonitor.org/'><img src='files/mdg_logo.png' alt='mdp logo' border='0' /></a></td> <td align='left' valign='bottom'><font color='#00486D' size='6'><b>MDG</b>MONITOR</td> </tr> <tr> <td align='right' valign='top'><font color='#00486D' size='4'>Track. Learn. Support.</font></td> </tr> </table></td> </tr> <tr> <td align='left' valign='top' bgcolor='#003F7C'><font color='#FFFFFF' size='5'><strong>Niue</strong></font></td> </tr> <tr> <td align='left' valign='top'><table border='0' cellspacing='0' cellpadding='0'> <tr> <td align='left' valign='top'><a href='http://www.mdgmonitor.org/factsheets_00.cfm?c=NUE'><img src='files/niue.jpg' alt='image' width='200' border='0' align='left' /></a></td> <td align='left' valign='middle'><p><strong><font size='3'>Total Population (millions):</font> </strong>0.001</p><p><strong><font size'3'><a href='http://unstats.un.org/unsd/cdb/cdb_dict_xrxx.asp?def_code=63'>GDP</a> per capita (PPP US$):</font></strong> NA </p><p><font size='3'><strong>2006 <a href='http://hdr.undp.org/hdr2006/statistics/indices/default.cfm' target='_blank'>Human Development Index</a> (Rank 1-177):</strong> </font>NA </p></td> </tr> </table></td> </tr> <tr> <td align='left' valign='top'><font color='#003F7C' size='5'><strong>Small population, great progress</strong></font></td> </tr> <tr> <td align='left' valign='top'><p><font color='#000000'>Population development remains Niue’s “ninth” MDG.  The small Pacific island faces economic disadvantages because of its population size  – 1,625, one of the world’s smallest. Nonetheless, the country has managed to accomplish five of the eight goals already and is on track to achieve all eight by 2015.</font></p></td> </tr> <tr> <td align='left' valign='top'><a href='http://www.mdgmonitor.org/factsheets_00.cfm?c=NUE'>Read more... </a></td> </tr> <tr> <td align='right' valign='top'><p>Read related articles on <a href='http://news.google.com/news?hl=en&ned=us&ie=UTF-8&q=Niue+%22millennium+development+goals%22'>Google News</a></p></td> </tr> <tr> <td align='right' valign='top'>&nbsp;</td> </tr> <tr> <td align='center'><table border='0' cellpadding='0' cellspacing='0'> <tr> <td align='right' valign='middle'><a href='http://www.un.org/'><img src='files/un_logo_small.png' alt='UN logo' border='0' /></a></td> <td align='left' valign='middle'><font color='#666666'>The  <a href="http://www.un.org/millenniumgoals/" target="_blank">Millennium Development Goals </a>(MDGs) were laid out by the leaders of the world in 2000. They include  halving extreme poverty, halting the spread of HIV/AIDS and   providing universal primary education, all by 2015.</font></td> </tr> </table></td> </tr> </table>]]></description>
			<styleUrl>#text_photo_banner</styleUrl>
			<Point>
				<coordinates>-169.9208293,-19.05519232,0</coordinates>
			</Point>
		</Placemark>
		<Placemark>
			<name>Pakistan</name>
			<visibility>0</visibility>
			<address>http://www.mdgmonitor.org/factsheets_00.cfm?c=PAK</address>
			<Snippet maxLines="2"></Snippet>
			<description><![CDATA[<table width='350' border='0' cellpadding='3' cellspacing='0' bgcolor='#FFFFFF'> <tr> <td align='left'><table border='0' cellspacing='0' cellpadding='0'> <tr> <td rowspan='2' align='left' valign='middle'><a href='http://www.mdgmonitor.org/'><img src='files/mdg_logo.png' alt='mdp logo' border='0' /></a></td> <td align='left' valign='bottom'><font color='#00486D' size='6'><b>MDG</b>MONITOR</td> </tr> <tr> <td align='right' valign='top'><font color='#00486D' size='4'>Track. Learn. Support.</font></td> </tr> </table></td> </tr> <tr> <td align='left' valign='top' bgcolor='#003F7C'><font color='#FFFFFF' size='5'><strong>Pakistan</strong></font></td> </tr> <tr> <td align='left' valign='top'><table border='0' cellspacing='0' cellpadding='0'> <tr> <td align='left' valign='top'><a href='http://www.mdgmonitor.org/factsheets_00.cfm?c=PAK'><img src='files/pakistan.jpg' alt='image' width='200' border='0' align='left' /></a></td> <td align='left' valign='middle'><p><strong><font size='3'>Total Population (millions):</font> </strong>157.9</p><p><strong><font size'3'><a href='http://unstats.un.org/unsd/cdb/cdb_dict_xrxx.asp?def_code=63'>GDP</a> per capita (PPP US$):</font></strong> 2403 </p><p><font size='3'><strong>2006 <a href='http://hdr.undp.org/hdr2006/statistics/indices/default.cfm' target='_blank'>Human Development Index</a> (Rank 1-177):</strong> </font>134 </p></td> </tr> </table></td> </tr> <tr> <td align='left' valign='top'><font color='#003F7C' size='5'><strong>After the earthquake</strong></font></td> </tr> <tr> <td align='left' valign='top'><p><font color='#000000'>Although nearly all of the MDGs are within reach for Pakistan, the aftermath of the 2005 earthquake still compromises their achievement. Between 2000 and 2001 and 2004 and 2005, poverty rates declined significantly; immunization coverage showed remarkable progress between 2001 and 2005; and prenatal care improved dramatically within the same four years.  The earthquake of 2005, however, placed competing demands on the government’s limited resources that, coupled with persistent inflation, could slow MDG progress.</font></p></td> </tr> <tr> <td align='left' valign='top'><a href='http://www.mdgmonitor.org/factsheets_00.cfm?c=PAK'>Read more... </a></td> </tr> <tr> <td align='right' valign='top'><p>Read related articles on <a href='http://news.google.com/archivesearch?hl=en&ned=us&ie=UTF-8&filter=0&q=Pakistan+%22millennium+development+goals%22'>Google News</a></p></td> </tr> <tr> <td align='right' valign='top'>&nbsp;</td> </tr> <tr> <td align='center'><table border='0' cellpadding='0' cellspacing='0'> <tr> <td align='right' valign='middle'><a href='http://www.un.org/'><img src='files/un_logo_small.png' alt='UN logo' border='0' /></a></td> <td align='left' valign='middle'><font color='#666666'>The  <a href="http://www.un.org/millenniumgoals/" target="_blank">Millennium Development Goals </a>(MDGs) were laid out by the leaders of the world in 2000. They include  halving extreme poverty, halting the spread of HIV/AIDS and   providing universal primary education, all by 2015.</font></td> </tr> </table></td> </tr> </table>]]></description>
			<styleUrl>#text_photo_banner</styleUrl>
			<Point>
				<coordinates>73.059997,33.720001,0</coordinates>
			</Point>
		</Placemark>
		<Placemark>
			<name>Panama</name>
			<visibility>0</visibility>
			<address>http://www.mdgmonitor.org/factsheets_00.cfm?c=PAN</address>
			<Snippet maxLines="2"></Snippet>
			<description><![CDATA[<table width='350' border='0' cellpadding='3' cellspacing='0' bgcolor='#FFFFFF'> <tr> <td align='left'><table border='0' cellspacing='0' cellpadding='0'> <tr> <td rowspan='2' align='left' valign='middle'><a href='http://www.mdgmonitor.org/'><img src='files/mdg_logo.png' alt='mdp logo' border='0' /></a></td> <td align='left' valign='bottom'><font color='#00486D' size='6'><b>MDG</b>MONITOR</td> </tr> <tr> <td align='right' valign='top'><font color='#00486D' size='4'>Track. Learn. Support.</font></td> </tr> </table></td> </tr> <tr> <td align='left' valign='top' bgcolor='#003F7C'><font color='#FFFFFF' size='5'><strong>Panama</strong></font></td> </tr> <tr> <td align='left' valign='top'><table border='0' cellspacing='0' cellpadding='0'> <tr> <td align='left' valign='top'><a href='http://www.mdgmonitor.org/factsheets_00.cfm?c=PAN'><img src='files/panama.jpg' alt='image' width='200' border='0' align='left' /></a></td> <td align='left' valign='middle'><p><strong><font size='3'>Total Population (millions):</font> </strong>3.23</p><p><strong><font size'3'><a href='http://unstats.un.org/unsd/cdb/cdb_dict_xrxx.asp?def_code=63'>GDP</a> per capita (PPP US$):</font></strong> 7884 </p><p><font size='3'><strong>2006 <a href='http://hdr.undp.org/hdr2006/statistics/indices/default.cfm' target='_blank'>Human Development Index</a> (Rank 1-177):</strong> </font>58 </p></td> </tr> </table></td> </tr> <tr> <td align='left' valign='top'><font color='#003F7C' size='5'><strong>Education: a strong point</strong></font></td> </tr> <tr> <td align='left' valign='top'><p><font color='#000000'>Educational achievements highlight Panama’s MDG progress.  From the creation of new teacher-training materials, to outreach campaigns including national posters and commemorative stamps, the Latin American country has used government activities to bring the percentage of its population enroled in primary education to 98.2.</font></p></td> </tr> <tr> <td align='left' valign='top'><a href='http://www.mdgmonitor.org/factsheets_00.cfm?c=PAN'>Read more... </a></td> </tr> <tr> <td align='right' valign='top'><p>Read related articles on <a href='http://news.google.com/archivesearch?hl=en&ned=us&ie=UTF-8&filter=0&q=Panama+%22millennium+development+goals%22'>Google News</a></p></td> </tr> <tr> <td align='right' valign='top'>&nbsp;</td> </tr> <tr> <td align='center'><table border='0' cellpadding='0' cellspacing='0'> <tr> <td align='right' valign='middle'><a href='http://www.un.org/'><img src='files/un_logo_small.png' alt='UN logo' border='0' /></a></td> <td align='left' valign='middle'><font color='#666666'>The  <a href="http://www.un.org/millenniumgoals/" target="_blank">Millennium Development Goals </a>(MDGs) were laid out by the leaders of the world in 2000. They include  halving extreme poverty, halting the spread of HIV/AIDS and   providing universal primary education, all by 2015.</font></td> </tr> </table></td> </tr> </table>]]></description>
			<styleUrl>#text_photo_banner</styleUrl>
			<Point>
				<coordinates>-79.51881400000001,8.994225999999999,0</coordinates>
			</Point>
		</Placemark>
		<Placemark>
			<name>Papua New Guinea</name>
			<visibility>0</visibility>
			<address>http://www.mdgmonitor.org/factsheets_00.cfm?c=PNG</address>
			<Snippet maxLines="2"></Snippet>
			<description><![CDATA[<table width='350' border='0' cellpadding='3' cellspacing='0' bgcolor='#FFFFFF'> <tr> <td align='left'><table border='0' cellspacing='0' cellpadding='0'> <tr> <td rowspan='2' align='left' valign='middle'><a href='http://www.mdgmonitor.org/'><img src='files/mdg_logo.png' alt='mdp logo' border='0' /></a></td> <td align='left' valign='bottom'><font color='#00486D' size='6'><b>MDG</b>MONITOR</td> </tr> <tr> <td align='right' valign='top'><font color='#00486D' size='4'>Track. Learn. Support.</font></td> </tr> </table></td> </tr> <tr> <td align='left' valign='top' bgcolor='#003F7C'><font color='#FFFFFF' size='5'><strong>Papua New Guinea</strong></font></td> </tr> <tr> <td align='left' valign='top'><table border='0' cellspacing='0' cellpadding='0'> <tr> <td align='left' valign='top'><a href='http://www.mdgmonitor.org/factsheets_00.cfm?c=PNG'><img src='files/papuanewguinea.jpg' alt='image' width='200' border='0' align='left' /></a></td> <td align='left' valign='middle'><p><strong><font size='3'>Total Population (millions):</font> </strong>5.89</p><p><strong><font size'3'><a href='http://unstats.un.org/unsd/cdb/cdb_dict_xrxx.asp?def_code=63'>GDP</a> per capita (PPP US$):</font></strong> 2801 </p><p><font size='3'><strong>2006 <a href='http://hdr.undp.org/hdr2006/statistics/indices/default.cfm' target='_blank'>Human Development Index</a> (Rank 1-177):</strong> </font>139 </p></td> </tr> </table></td> </tr> <tr> <td align='left' valign='top'><font color='#003F7C' size='5'><strong>Youth and the MDGs</strong></font></td> </tr> <tr> <td align='left' valign='top'><p><font color='#000000'>Papua New Guinea’s 2006 MDG Youth Summit underscored the necessity of accomplishing the goals by 2015. Two girls and two boys from each of Papua New Guinea’s 20 provinces participated in the conference, which addressed the specific social issues affecting youth in the country, highlighting the dangers of risky sexual behaviors and calling attention to the MDGs.</font></p></td> </tr> <tr> <td align='left' valign='top'><a href='http://www.mdgmonitor.org/factsheets_00.cfm?c=PNG'>Read more... </a></td> </tr> <tr> <td align='right' valign='top'><p>Read related articles on <a href='http://news.google.com/archivesearch?hl=en&ned=us&ie=UTF-8&filter=0&q=Papua+New+Guinea+%22millennium+development+goals%22'>Google News</a></p></td> </tr> <tr> <td align='right' valign='top'>&nbsp;</td> </tr> <tr> <td align='center'><table border='0' cellpadding='0' cellspacing='0'> <tr> <td align='right' valign='middle'><a href='http://www.un.org/'><img src='files/un_logo_small.png' alt='UN logo' border='0' /></a></td> <td align='left' valign='middle'><font color='#666666'>The  <a href="http://www.un.org/millenniumgoals/" target="_blank">Millennium Development Goals </a>(MDGs) were laid out by the leaders of the world in 2000. They include  halving extreme poverty, halting the spread of HIV/AIDS and   providing universal primary education, all by 2015.</font></td> </tr> </table></td> </tr> </table>]]></description>
			<styleUrl>#text_photo_banner</styleUrl>
			<Point>
				<coordinates>147.172852,-9.476907000000001,0</coordinates>
			</Point>
		</Placemark>
		<Placemark>
			<name>Peru</name>
			<visibility>0</visibility>
			<address>http://www.mdgmonitor.org/factsheets_00.cfm?c=PER</address>
			<Snippet maxLines="2"></Snippet>
			<description><![CDATA[<table width='350' border='0' cellpadding='3' cellspacing='0' bgcolor='#FFFFFF'> <tr> <td align='left'><table border='0' cellspacing='0' cellpadding='0'> <tr> <td rowspan='2' align='left' valign='middle'><a href='http://www.mdgmonitor.org/'><img src='files/mdg_logo.png' alt='mdp logo' border='0' /></a></td> <td align='left' valign='bottom'><font color='#00486D' size='6'><b>MDG</b>MONITOR</td> </tr> <tr> <td align='right' valign='top'><font color='#00486D' size='4'>Track. Learn. Support.</font></td> </tr> </table></td> </tr> <tr> <td align='left' valign='top' bgcolor='#003F7C'><font color='#FFFFFF' size='5'><strong>Peru</strong></font></td> </tr> <tr> <td align='left' valign='top'><table border='0' cellspacing='0' cellpadding='0'> <tr> <td align='left' valign='top'><a href='http://www.mdgmonitor.org/factsheets_00.cfm?c=PER'><img src='files/peru.jpg' alt='image' width='200' border='0' align='left' /></a></td> <td align='left' valign='middle'><p><strong><font size='3'>Total Population (millions):</font> </strong>27.97</p><p><strong><font size'3'><a href='http://unstats.un.org/unsd/cdb/cdb_dict_xrxx.asp?def_code=63'>GDP</a> per capita (PPP US$):</font></strong> 6226 </p><p><font size='3'><strong>2006 <a href='http://hdr.undp.org/hdr2006/statistics/indices/default.cfm' target='_blank'>Human Development Index</a> (Rank 1-177):</strong> </font>82 </p></td> </tr> </table></td> </tr> <tr> <td align='left' valign='top'><font color='#003F7C' size='5'><strong>The MDGs as part of the congressional budget</strong></font></td> </tr> <tr> <td align='left' valign='top'><p><font color='#000000'>Bolstered by congress’ inclusion of the MDGs in its national budget, Peru is set to achieve some of its targets by 2015.   Primary education and gender equality have seen significant progress, with 97.1 percent of both sexes enroled in primary education and women holding 18.3 percent of parliamentary seats. To complement that success, some United Nations organizations in Peru have coordinated activities to promote specific goals at the community level, dealing with nutrition and food security, universal primary education, child and maternal health, the eradication of HIV/AIDS and other contagious diseases and environmental sustainability.</font></p></td> </tr> <tr> <td align='left' valign='top'><a href='http://www.mdgmonitor.org/factsheets_00.cfm?c=PER'>Read more... </a></td> </tr> <tr> <td align='right' valign='top'><p>Read related articles on <a href='http://news.google.com/archivesearch?hl=en&ned=us&ie=UTF-8&filter=0&q=Peru+%22millennium+development+goals%22'>Google News</a></p></td> </tr> <tr> <td align='right' valign='top'>&nbsp;</td> </tr> <tr> <td align='center'><table border='0' cellpadding='0' cellspacing='0'> <tr> <td align='right' valign='middle'><a href='http://www.un.org/'><img src='files/un_logo_small.png' alt='UN logo' border='0' /></a></td> <td align='left' valign='middle'><font color='#666666'>The  <a href="http://www.un.org/millenniumgoals/" target="_blank">Millennium Development Goals </a>(MDGs) were laid out by the leaders of the world in 2000. They include  halving extreme poverty, halting the spread of HIV/AIDS and   providing universal primary education, all by 2015.</font></td> </tr> </table></td> </tr> </table>]]></description>
			<styleUrl>#text_photo_banner</styleUrl>
			<Point>
				<coordinates>-77.04174899,-12.06040309,0</coordinates>
			</Point>
		</Placemark>
		<Placemark>
			<name>Philippines</name>
			<visibility>0</visibility>
			<address>http://www.mdgmonitor.org/factsheets_00.cfm?c=PHL</address>
			<Snippet maxLines="2"></Snippet>
			<description><![CDATA[<table width='350' border='0' cellpadding='3' cellspacing='0' bgcolor='#FFFFFF'> <tr> <td align='left'><table border='0' cellspacing='0' cellpadding='0'> <tr> <td rowspan='2' align='left' valign='middle'><a href='http://www.mdgmonitor.org/'><img src='files/mdg_logo.png' alt='mdp logo' border='0' /></a></td> <td align='left' valign='bottom'><font color='#00486D' size='6'><b>MDG</b>MONITOR</td> </tr> <tr> <td align='right' valign='top'><font color='#00486D' size='4'>Track. Learn. Support.</font></td> </tr> </table></td> </tr> <tr> <td align='left' valign='top' bgcolor='#003F7C'><font color='#FFFFFF' size='5'><strong>Philippines</strong></font></td> </tr> <tr> <td align='left' valign='top'><table border='0' cellspacing='0' cellpadding='0'> <tr> <td align='left' valign='top'><a href='http://www.mdgmonitor.org/factsheets_00.cfm?c=PHL'><img src='files/philippines.jpg' alt='image' width='200' border='0' align='left' /></a></td> <td align='left' valign='middle'><p><strong><font size='3'>Total Population (millions):</font> </strong>83.05</p><p><strong><font size'3'><a href='http://unstats.un.org/unsd/cdb/cdb_dict_xrxx.asp?def_code=63'>GDP</a> per capita (PPP US$):</font></strong> 4920 </p><p><font size='3'><strong>2006 <a href='http://hdr.undp.org/hdr2006/statistics/indices/default.cfm' target='_blank'>Human Development Index</a> (Rank 1-177):</strong> </font>84 </p></td> </tr> </table></td> </tr> <tr> <td align='left' valign='top'><font color='#003F7C' size='5'><strong>Refining investments and budgeting</strong></font></td> </tr> <tr> <td align='left' valign='top'><p><font color='#000000'>All of the MDGs are within reach for the Philippines.  Although certain areas, such as achieving universal primary education and improving maternal health, require extra efforts, the country has made significant progress toward its targets for gender equality, child mortality and the fight against HIV/AIDS.  Addressing investment priorities, financial requirements, budgeting and bridging resource gaps in order to achieve the goals is the government’s next step.</font></p></td> </tr> <tr> <td align='left' valign='top'><a href='http://www.mdgmonitor.org/factsheets_00.cfm?c=PHL'>Read more... </a></td> </tr> <tr> <td align='right' valign='top'><p>Read related articles on <a href='http://news.google.com/news?hl=en&ned=us&ie=UTF-8&filter=0&q=Philippines+%22millennium+development+goals%22'>Google News</a></p></td> </tr> <tr> <td align='right' valign='top'>&nbsp;</td> </tr> <tr> <td align='center'><table border='0' cellpadding='0' cellspacing='0'> <tr> <td align='right' valign='middle'><a href='http://www.un.org/'><img src='files/un_logo_small.png' alt='UN logo' border='0' /></a></td> <td align='left' valign='middle'><font color='#666666'>The  <a href="http://www.un.org/millenniumgoals/" target="_blank">Millennium Development Goals </a>(MDGs) were laid out by the leaders of the world in 2000. They include  halving extreme poverty, halting the spread of HIV/AIDS and   providing universal primary education, all by 2015.</font></td> </tr> </table></td> </tr> </table>]]></description>
			<styleUrl>#text_photo_banner</styleUrl>
			<Point>
				<coordinates>120.9818043,14.60392159,0</coordinates>
			</Point>
		</Placemark>
		<Placemark>
			<name>Romania</name>
			<visibility>0</visibility>
			<address>http://www.mdgmonitor.org/factsheets_00.cfm?c=ROM</address>
			<Snippet maxLines="2"></Snippet>
			<description><![CDATA[<table width='350' border='0' cellpadding='3' cellspacing='0' bgcolor='#FFFFFF'> <tr> <td align='left'><table border='0' cellspacing='0' cellpadding='0'> <tr> <td rowspan='2' align='left' valign='middle'><a href='http://www.mdgmonitor.org/'><img src='files/mdg_logo.png' alt='mdp logo' border='0' /></a></td> <td align='left' valign='bottom'><font color='#00486D' size='6'><b>MDG</b>MONITOR</td> </tr> <tr> <td align='right' valign='top'><font color='#00486D' size='4'>Track. Learn. Support.</font></td> </tr> </table></td> </tr> <tr> <td align='left' valign='top' bgcolor='#003F7C'><font color='#FFFFFF' size='5'><strong>Romania</strong></font></td> </tr> <tr> <td align='left' valign='top'><table border='0' cellspacing='0' cellpadding='0'> <tr> <td align='left' valign='top'><a href='http://www.mdgmonitor.org/factsheets_00.cfm?c=ROM'><img src='files/romania.jpg' alt='image' width='200' border='0' align='left' /></a></td> <td align='left' valign='middle'><p><strong><font size='3'>Total Population (millions):</font> </strong>21.71</p><p><strong><font size'3'><a href='http://unstats.un.org/unsd/cdb/cdb_dict_xrxx.asp?def_code=63'>GDP</a> per capita (PPP US$):</font></strong> 9208 </p><p><font size='3'><strong>2006 <a href='http://hdr.undp.org/hdr2006/statistics/indices/default.cfm' target='_blank'>Human Development Index</a> (Rank 1-177):</strong> </font>60 </p></td> </tr> </table></td> </tr> <tr> <td align='left' valign='top'><font color='#003F7C' size='5'><strong>Women's empowerment and localization</strong></font></td> </tr> <tr> <td align='left' valign='top'><p><font color='#000000'>With only two percent of Romania’s population surviving on less than $1 per day, the Eastern-European country has met its initial MDG target for eradicating extreme poverty and hunger.  The country has also met its goals for improving maternal health and combating HIV/AIDS, malaria and other diseases.  Nonetheless, Romania faces challenges in several areas, particularly the empowerment of women and the localization of the goals.</font></p></td> </tr> <tr> <td align='left' valign='top'><a href='http://www.mdgmonitor.org/factsheets_00.cfm?c=ROM'>Read more... </a></td> </tr> <tr> <td align='right' valign='top'><p>Read related articles on <a href='http://news.google.com/news?hl=en&ned=us&ie=UTF-8&q=Romania+%22millennium+development+goals%22'>Google News</a></p></td> </tr> <tr> <td align='right' valign='top'>&nbsp;</td> </tr> <tr> <td align='center'><table border='0' cellpadding='0' cellspacing='0'> <tr> <td align='right' valign='middle'><a href='http://www.un.org/'><img src='files/un_logo_small.png' alt='UN logo' border='0' /></a></td> <td align='left' valign='middle'><font color='#666666'>The  <a href="http://www.un.org/millenniumgoals/" target="_blank">Millennium Development Goals </a>(MDGs) were laid out by the leaders of the world in 2000. They include  halving extreme poverty, halting the spread of HIV/AIDS and   providing universal primary education, all by 2015.</font></td> </tr> </table></td> </tr> </table>]]></description>
			<styleUrl>#text_photo_banner</styleUrl>
			<Point>
				<coordinates>26.09080705,44.42737764,0</coordinates>
			</Point>
		</Placemark>
		<Placemark>
			<name>Russian Federation</name>
			<visibility>0</visibility>
			<address>http://www.mdgmonitor.org/factsheets_00.cfm?c=RUS</address>
			<Snippet maxLines="2"></Snippet>
			<description><![CDATA[<table width='350' border='0' cellpadding='3' cellspacing='0' bgcolor='#FFFFFF'> <tr> <td align='left'><table border='0' cellspacing='0' cellpadding='0'> <tr> <td rowspan='2' align='left' valign='middle'><a href='http://www.mdgmonitor.org/'><img src='files/mdg_logo.png' alt='mdp logo' border='0' /></a></td> <td align='left' valign='bottom'><font color='#00486D' size='6'><b>MDG</b>MONITOR</td> </tr> <tr> <td align='right' valign='top'><font color='#00486D' size='4'>Track. Learn. Support.</font></td> </tr> </table></td> </tr> <tr> <td align='left' valign='top' bgcolor='#003F7C'><font color='#FFFFFF' size='5'><strong>Russian Federation</strong></font></td> </tr> <tr> <td align='left' valign='top'><table border='0' cellspacing='0' cellpadding='0'> <tr> <td align='left' valign='top'><a href='http://www.mdgmonitor.org/factsheets_00.cfm?c=RUS'><img src='files/russia.jpg' alt='image' width='200' border='0' align='left' /></a></td> <td align='left' valign='middle'><p><strong><font size='3'>Total Population (millions):</font> </strong>143.2</p><p><strong><font size'3'><a href='http://unstats.un.org/unsd/cdb/cdb_dict_xrxx.asp?def_code=63'>GDP</a> per capita (PPP US$):</font></strong> 10897 </p><p><font size='3'><strong>2006 <a href='http://hdr.undp.org/hdr2006/statistics/indices/default.cfm' target='_blank'>Human Development Index</a> (Rank 1-177):</strong> </font>65 </p></td> </tr> </table></td> </tr> <tr> <td align='left' valign='top'><font color='#003F7C' size='5'><strong>80 plus regions and disparities</strong></font></td> </tr> <tr> <td align='left' valign='top'><p><font color='#000000'>Although the Russian Federation, a middle-income country and a member of the G8, does not formally follow the MDGs, the indicators provide a model for the country’s development planning. The main achievements of the past five to seven years include a significant poverty-level reduction as well as a reduction in child and maternal mortality levels. Nonetheless, additional work is necessary: disparities in the level of development between the 80-plus Russian regions remains very high; some compare with European Union countries, but some are as poor as the least developed nations.</font></p></td> </tr> <tr> <td align='left' valign='top'><a href='http://www.mdgmonitor.org/factsheets_00.cfm?c=RUS'>Read more... </a></td> </tr> <tr> <td align='right' valign='top'><p>Read related articles on <a href='http://news.google.com/news?hl=en&ned=us&ie=UTF-8&q=Russia+%22millennium+development+goals%22'>Google News</a></p></td> </tr> <tr> <td align='right' valign='top'>&nbsp;</td> </tr> <tr> <td align='center'><table border='0' cellpadding='0' cellspacing='0'> <tr> <td align='right' valign='middle'><a href='http://www.un.org/'><img src='files/un_logo_small.png' alt='UN logo' border='0' /></a></td> <td align='left' valign='middle'><font color='#666666'>The  <a href="http://www.un.org/millenniumgoals/" target="_blank">Millennium Development Goals </a>(MDGs) were laid out by the leaders of the world in 2000. They include  halving extreme poverty, halting the spread of HIV/AIDS and   providing universal primary education, all by 2015.</font></td> </tr> </table></td> </tr> </table>]]></description>
			<styleUrl>#text_photo_banner</styleUrl>
			<Point>
				<coordinates>37.62361817,55.75138041000001,0</coordinates>
			</Point>
		</Placemark>
		<Placemark>
			<name>Samoa</name>
			<visibility>0</visibility>
			<address>http://www.mdgmonitor.org/factsheets_00.cfm?c=WSM</address>
			<Snippet maxLines="2"></Snippet>
			<description><![CDATA[<table width='350' border='0' cellpadding='3' cellspacing='0' bgcolor='#FFFFFF'> <tr> <td align='left'><table border='0' cellspacing='0' cellpadding='0'> <tr> <td rowspan='2' align='left' valign='middle'><a href='http://www.mdgmonitor.org/'><img src='files/mdg_logo.png' alt='mdp logo' border='0' /></a></td> <td align='left' valign='bottom'><font color='#00486D' size='6'><b>MDG</b>MONITOR</td> </tr> <tr> <td align='right' valign='top'><font color='#00486D' size='4'>Track. Learn. Support.</font></td> </tr> </table></td> </tr> <tr> <td align='left' valign='top' bgcolor='#003F7C'><font color='#FFFFFF' size='5'><strong>Samoa</strong></font></td> </tr> <tr> <td align='left' valign='top'><table border='0' cellspacing='0' cellpadding='0'> <tr> <td align='left' valign='top'><a href='http://www.mdgmonitor.org/factsheets_00.cfm?c=WSM'><img src='files/samoa.jpg' alt='image' width='200' border='0' align='left' /></a></td> <td align='left' valign='middle'><p><strong><font size='3'>Total Population (millions):</font> </strong>0.18</p><p><strong><font size'3'><a href='http://unstats.un.org/unsd/cdb/cdb_dict_xrxx.asp?def_code=63'>GDP</a> per capita (PPP US$):</font></strong> 6615 </p><p><font size='3'><strong>2006 <a href='http://hdr.undp.org/hdr2006/statistics/indices/default.cfm' target='_blank'>Human Development Index</a> (Rank 1-177):</strong> </font>75 </p></td> </tr> </table></td> </tr> <tr> <td align='left' valign='top'><font color='#003F7C' size='5'><strong>"Poverty of opportunity"</strong></font></td> </tr> <tr> <td align='left' valign='top'><p><font color='#000000'>At the midpoint of the Millennium Campaign, Samoa has reached its targets for goals three, four and five: promoting gender equality, reducing child mortality and improving maternal health. The country is also on track to achieve its targets for goal six, combating HIV/AIDS and other diseases, and number seven, ensuring environmental sustainability. Despite these impressive social and economic developments, national figures hide disparities across communities. Although extreme poverty does not exist, ‘poverty of opportunity’ affects a sizeable number of Samoans, especially in rural areas and pockets of the urban population.</font></p></td> </tr> <tr> <td align='left' valign='top'><a href='http://www.mdgmonitor.org/factsheets_00.cfm?c=WSM'>Read more... </a></td> </tr> <tr> <td align='right' valign='top'><p>Read related articles on <a href='http://news.google.com/archivesearch?q=%22Samoa+%22+%22millennium+development+goals%22&hl=en&ned=us&ie=UTF-8'>Google News</a></p></td> </tr> <tr> <td align='right' valign='top'>&nbsp;</td> </tr> <tr> <td align='center'><table border='0' cellpadding='0' cellspacing='0'> <tr> <td align='right' valign='middle'><a href='http://www.un.org/'><img src='files/un_logo_small.png' alt='UN logo' border='0' /></a></td> <td align='left' valign='middle'><font color='#666666'>The  <a href="http://www.un.org/millenniumgoals/" target="_blank">Millennium Development Goals </a>(MDGs) were laid out by the leaders of the world in 2000. They include  halving extreme poverty, halting the spread of HIV/AIDS and   providing universal primary education, all by 2015.</font></td> </tr> </table></td> </tr> </table>]]></description>
			<styleUrl>#text_photo_banner</styleUrl>
			<Point>
				<coordinates>-171.7591128,-13.83032025,0</coordinates>
			</Point>
		</Placemark>
		<Placemark>
			<name>Saudi Arabia</name>
			<visibility>0</visibility>
			<address>http://www.mdgmonitor.org/factsheets_00.cfm?c=SAU</address>
			<Snippet maxLines="2"></Snippet>
			<description><![CDATA[<table width='350' border='0' cellpadding='3' cellspacing='0' bgcolor='#FFFFFF'> <tr> <td align='left'><table border='0' cellspacing='0' cellpadding='0'> <tr> <td rowspan='2' align='left' valign='middle'><a href='http://www.mdgmonitor.org/'><img src='files/mdg_logo.png' alt='mdp logo' border='0' /></a></td> <td align='left' valign='bottom'><font color='#00486D' size='6'><b>MDG</b>MONITOR</td> </tr> <tr> <td align='right' valign='top'><font color='#00486D' size='4'>Track. Learn. Support.</font></td> </tr> </table></td> </tr> <tr> <td align='left' valign='top' bgcolor='#003F7C'><font color='#FFFFFF' size='5'><strong>Saudi Arabia</strong></font></td> </tr> <tr> <td align='left' valign='top'><table border='0' cellspacing='0' cellpadding='0'> <tr> <td align='left' valign='top'><a href='http://www.mdgmonitor.org/factsheets_00.cfm?c=SAU'><img src='files/saudiarabia.jpg' alt='image' width='200' border='0' align='left' /></a></td> <td align='left' valign='middle'><p><strong><font size='3'>Total Population (millions):</font> </strong>24.57</p><p><strong><font size'3'><a href='http://unstats.un.org/unsd/cdb/cdb_dict_xrxx.asp?def_code=63'>GDP</a> per capita (PPP US$):</font></strong> 14729 </p><p><font size='3'><strong>2006 <a href='http://hdr.undp.org/hdr2006/statistics/indices/default.cfm' target='_blank'>Human Development Index</a> (Rank 1-177):</strong> </font>76 </p></td> </tr> </table></td> </tr> <tr> <td align='left' valign='top'><font color='#003F7C' size='5'><strong>Ahead of schedule</strong></font></td> </tr> <tr> <td align='left' valign='top'><p><font color='#000000'>A concerted effort to surpass the MDGs ahead of schedule marks Saudi Arabia’s progress.  The Middle Eastern country is on schedule to achieve nearly all of the MDGs by 2015, with  93.6 percent of students finishing grades one through five; and a 95.9 percent literacy rate for 15 through 24-year-olds. The country’s next step includes an emphasis on regional planning, with the need to localize MDG indicators for the 13 regions in Saudi Arabia.</font></p></td> </tr> <tr> <td align='left' valign='top'><a href='http://www.mdgmonitor.org/factsheets_00.cfm?c=SAU'>Read more... </a></td> </tr> <tr> <td align='right' valign='top'><p>Read related articles on <a href='http://news.google.com/archivesearch?q=%22Saudi+Arabia+%22+%22millennium+development+goals%22&hl=en&ned=us&ie=UTF-8'>Google News</a></p></td> </tr> <tr> <td align='right' valign='top'>&nbsp;</td> </tr> <tr> <td align='center'><table border='0' cellpadding='0' cellspacing='0'> <tr> <td align='right' valign='middle'><a href='http://www.un.org/'><img src='files/un_logo_small.png' alt='UN logo' border='0' /></a></td> <td align='left' valign='middle'><font color='#666666'>The  <a href="http://www.un.org/millenniumgoals/" target="_blank">Millennium Development Goals </a>(MDGs) were laid out by the leaders of the world in 2000. They include  halving extreme poverty, halting the spread of HIV/AIDS and   providing universal primary education, all by 2015.</font></td> </tr> </table></td> </tr> </table>]]></description>
			<styleUrl>#text_photo_banner</styleUrl>
			<Point>
				<coordinates>46.71839759000001,24.64030763,0</coordinates>
			</Point>
		</Placemark>
		<Placemark>
			<name>Senegal</name>
			<visibility>0</visibility>
			<address>http://www.mdgmonitor.org/factsheets_00.cfm?c=SEN</address>
			<Snippet maxLines="2"></Snippet>
			<description><![CDATA[<table width='350' border='0' cellpadding='3' cellspacing='0' bgcolor='#FFFFFF'> <tr> <td align='left'><table border='0' cellspacing='0' cellpadding='0'> <tr> <td rowspan='2' align='left' valign='middle'><a href='http://www.mdgmonitor.org/'><img src='files/mdg_logo.png' alt='mdp logo' border='0' /></a></td> <td align='left' valign='bottom'><font color='#00486D' size='6'><b>MDG</b>MONITOR</td> </tr> <tr> <td align='right' valign='top'><font color='#00486D' size='4'>Track. Learn. Support.</font></td> </tr> </table></td> </tr> <tr> <td align='left' valign='top' bgcolor='#003F7C'><font color='#FFFFFF' size='5'><strong>Senegal</strong></font></td> </tr> <tr> <td align='left' valign='top'><table border='0' cellspacing='0' cellpadding='0'> <tr> <td align='left' valign='top'><a href='http://www.mdgmonitor.org/factsheets_00.cfm?c=SEN'><img src='files/senegal.jpg' alt='image' width='200' border='0' align='left' /></a></td> <td align='left' valign='middle'><p><strong><font size='3'>Total Population (millions):</font> </strong>11.66</p><p><strong><font size'3'><a href='http://unstats.un.org/unsd/cdb/cdb_dict_xrxx.asp?def_code=63'>GDP</a> per capita (PPP US$):</font></strong> 1806 </p><p><font size='3'><strong>2006 <a href='http://hdr.undp.org/hdr2006/statistics/indices/default.cfm' target='_blank'>Human Development Index</a> (Rank 1-177):</strong> </font>156 </p></td> </tr> </table></td> </tr> <tr> <td align='left' valign='top'><font color='#003F7C' size='5'><strong>A national MDG coalition</strong></font></td> </tr> <tr> <td align='left' valign='top'><p><font color='#000000'>On schedule to reach its targets for achieving universal primary education and reducing child mortality, Senegal is committed to the MDGs. In 2007, the African country monitored the establishment of a national MDG coalition (made up of members of civil society, representatives of civil society, and elected members serving on regional councils) to provide supervision for action programmes.</font></p></td> </tr> <tr> <td align='left' valign='top'><a href='http://www.mdgmonitor.org/factsheets_00.cfm?c=SEN'>Read more... </a></td> </tr> <tr> <td align='right' valign='top'><p>Read related articles on <a href='http://news.google.com/news?hl=en&ned=us&q=%22Senegal+%22+%22millennium+development+goals%22&btnG=Search+News'>Google News</a></p></td> </tr> <tr> <td align='right' valign='top'>&nbsp;</td> </tr> <tr> <td align='center'><table border='0' cellpadding='0' cellspacing='0'> <tr> <td align='right' valign='middle'><a href='http://www.un.org/'><img src='files/un_logo_small.png' alt='UN logo' border='0' /></a></td> <td align='left' valign='middle'><font color='#666666'>The  <a href="http://www.un.org/millenniumgoals/" target="_blank">Millennium Development Goals </a>(MDGs) were laid out by the leaders of the world in 2000. They include  halving extreme poverty, halting the spread of HIV/AIDS and   providing universal primary education, all by 2015.</font></td> </tr> </table></td> </tr> </table>]]></description>
			<styleUrl>#text_photo_banner</styleUrl>
			<Point>
				<coordinates>-17.44464916,14.68337626,0</coordinates>
			</Point>
		</Placemark>
		<Placemark>
			<name>Serbia</name>
			<visibility>0</visibility>
			<address>http://www.mdgmonitor.org/factsheets_00.cfm?c=SRB</address>
			<Snippet maxLines="2"></Snippet>
			<description><![CDATA[<table width='350' border='0' cellpadding='3' cellspacing='0' bgcolor='#FFFFFF'> <tr> <td align='left'><table border='0' cellspacing='0' cellpadding='0'> <tr> <td rowspan='2' align='left' valign='middle'><a href='http://www.mdgmonitor.org/'><img src='files/mdg_logo.png' alt='mdp logo' border='0' /></a></td> <td align='left' valign='bottom'><font color='#00486D' size='6'><b>MDG</b>MONITOR</td> </tr> <tr> <td align='right' valign='top'><font color='#00486D' size='4'>Track. Learn. Support.</font></td> </tr> </table></td> </tr> <tr> <td align='left' valign='top' bgcolor='#003F7C'><font color='#FFFFFF' size='5'><strong>Serbia</strong></font></td> </tr> <tr> <td align='left' valign='top'><table border='0' cellspacing='0' cellpadding='0'> <tr> <td align='left' valign='top'><a href='http://www.mdgmonitor.org/factsheets_00.cfm?c=SRB'><img src='files/serbia.jpg' alt='image' width='200' border='0' align='left' /></a></td> <td align='left' valign='middle'><p><strong><font size='3'>Total Population (millions):</font> </strong>10.5</p><p><strong><font size'3'><a href='http://unstats.un.org/unsd/cdb/cdb_dict_xrxx.asp?def_code=63'>GDP</a> per capita (PPP US$):</font></strong> NA </p><p><font size='3'><strong>2006 <a href='http://hdr.undp.org/hdr2006/statistics/indices/default.cfm' target='_blank'>Human Development Index</a> (Rank 1-177):</strong> </font>NA </p></td> </tr> </table></td> </tr> <tr> <td align='left' valign='top'><font color='#003F7C' size='5'><strong>Monitoring progress as an issue</strong></font></td> </tr> <tr> <td align='left' valign='top'><p><font color='#000000'>In 2006, the Government of Serbia set up a task force to customize the MDGs to the special needs of its citizens. National priorities include unemployment reduction as the main prerequisite for poverty alleviation, and tending to the needs of vulnerable groups such as the Roma and rural populations. Tracking progress toward the goals remains one of Serbia’s toughest challenges. Too often, success is measured regionally but without any sectoral harmonization.</font></p></td> </tr> <tr> <td align='left' valign='top'><a href='http://www.mdgmonitor.org/factsheets_00.cfm?c=SRB'>Read more... </a></td> </tr> <tr> <td align='right' valign='top'><p>Read related articles on <a href='http://news.google.com/news?hl=en&ned=us&ie=UTF-8&q=Serbia+%22millennium+development+goals%22'>Google News</a></p></td> </tr> <tr> <td align='right' valign='top'>&nbsp;</td> </tr> <tr> <td align='center'><table border='0' cellpadding='0' cellspacing='0'> <tr> <td align='right' valign='middle'><a href='http://www.un.org/'><img src='files/un_logo_small.png' alt='UN logo' border='0' /></a></td> <td align='left' valign='middle'><font color='#666666'>The  <a href="http://www.un.org/millenniumgoals/" target="_blank">Millennium Development Goals </a>(MDGs) were laid out by the leaders of the world in 2000. They include  halving extreme poverty, halting the spread of HIV/AIDS and   providing universal primary education, all by 2015.</font></td> </tr> </table></td> </tr> </table>]]></description>
			<styleUrl>#text_photo_banner</styleUrl>
			<Point>
				<coordinates>20.46429635000001,44.80653052,0</coordinates>
			</Point>
		</Placemark>
		<Placemark>
			<name>Sierra Leone</name>
			<visibility>0</visibility>
			<address>http://www.mdgmonitor.org/factsheets_00.cfm?c=SLE</address>
			<Snippet maxLines="2"></Snippet>
			<description><![CDATA[<table width='350' border='0' cellpadding='3' cellspacing='0' bgcolor='#FFFFFF'> <tr> <td align='left'><table border='0' cellspacing='0' cellpadding='0'> <tr> <td rowspan='2' align='left' valign='middle'><a href='http://www.mdgmonitor.org/'><img src='files/mdg_logo.png' alt='mdp logo' border='0' /></a></td> <td align='left' valign='bottom'><font color='#00486D' size='6'><b>MDG</b>MONITOR</td> </tr> <tr> <td align='right' valign='top'><font color='#00486D' size='4'>Track. Learn. Support.</font></td> </tr> </table></td> </tr> <tr> <td align='left' valign='top' bgcolor='#003F7C'><font color='#FFFFFF' size='5'><strong>Sierra Leone</strong></font></td> </tr> <tr> <td align='left' valign='top'><table border='0' cellspacing='0' cellpadding='0'> <tr> <td align='left' valign='top'><a href='http://www.mdgmonitor.org/factsheets_00.cfm?c=SLE'><img src='files/sierraLeone.JPG' alt='image' width='200' border='0' align='left' /></a></td> <td align='left' valign='middle'><p><strong><font size='3'>Total Population (millions):</font> </strong>5.53</p><p><strong><font size'3'><a href='http://unstats.un.org/unsd/cdb/cdb_dict_xrxx.asp?def_code=63'>GDP</a> per capita (PPP US$):</font></strong> 805 </p><p><font size='3'><strong>2006 <a href='http://hdr.undp.org/hdr2006/statistics/indices/default.cfm' target='_blank'>Human Development Index</a> (Rank 1-177):</strong> </font>176 </p></td> </tr> </table></td> </tr> <tr> <td align='left' valign='top'><font color='#003F7C' size='5'><strong>Political challenges</strong></font></td> </tr> <tr> <td align='left' valign='top'><p><font color='#000000'>Thanks to the allocation of funds from a multilateral debt-relief initiative, Sierra Leone seems on track to achieve several of the eight MDGs by 2015.  Promoting gender equality and combating HIV/AIDS and other diseases have seen progress in the African   ountry, where women hold 14.5 percent of parliamentary seats and only 847 out of every 100,000 people have tuberculosis.  Nonetheless, political challenges are likely to make the achievement of all eight goals difficult.</font></p></td> </tr> <tr> <td align='left' valign='top'><a href='http://www.mdgmonitor.org/factsheets_00.cfm?c=SLE'>Read more... </a></td> </tr> <tr> <td align='right' valign='top'><p>Read related articles on <a href='http://news.google.com/archivesearch?hl=en&ned=us&ie=UTF-8&q=Sierra+Leone+%22millennium+development+goals%22'>Google News</a></p></td> </tr> <tr> <td align='right' valign='top'>&nbsp;</td> </tr> <tr> <td align='center'><table border='0' cellpadding='0' cellspacing='0'> <tr> <td align='right' valign='middle'><a href='http://www.un.org/'><img src='files/un_logo_small.png' alt='UN logo' border='0' /></a></td> <td align='left' valign='middle'><font color='#666666'>The  <a href="http://www.un.org/millenniumgoals/" target="_blank">Millennium Development Goals </a>(MDGs) were laid out by the leaders of the world in 2000. They include  halving extreme poverty, halting the spread of HIV/AIDS and   providing universal primary education, all by 2015.</font></td> </tr> </table></td> </tr> </table>]]></description>
			<styleUrl>#text_photo_banner</styleUrl>
			<Point>
				<coordinates>-13.226405,8.487932000000001,0</coordinates>
			</Point>
		</Placemark>
		<Placemark>
			<name>Slovak Republic</name>
			<visibility>0</visibility>
			<address>http://www.mdgmonitor.org/factsheets_00.cfm?c=SVK</address>
			<Snippet maxLines="2"></Snippet>
			<description><![CDATA[<table width='350' border='0' cellpadding='3' cellspacing='0' bgcolor='#FFFFFF'> <tr> <td align='left'><table border='0' cellspacing='0' cellpadding='0'> <tr> <td rowspan='2' align='left' valign='middle'><a href='http://www.mdgmonitor.org/'><img src='files/mdg_logo.png' alt='mdp logo' border='0' /></a></td> <td align='left' valign='bottom'><font color='#00486D' size='6'><b>MDG</b>MONITOR</td> </tr> <tr> <td align='right' valign='top'><font color='#00486D' size='4'>Track. Learn. Support.</font></td> </tr> </table></td> </tr> <tr> <td align='left' valign='top' bgcolor='#003F7C'><font color='#FFFFFF' size='5'><strong>Slovak Republic</strong></font></td> </tr> <tr> <td align='left' valign='top'><table border='0' cellspacing='0' cellpadding='0'> <tr> <td align='left' valign='top'><a href='http://www.mdgmonitor.org/factsheets_00.cfm?c=SVK'><img src='files/slovakrepublic.jpg' alt='image' width='200' border='0' align='left' /></a></td> <td align='left' valign='middle'><p><strong><font size='3'>Total Population (millions):</font> </strong>5.4</p><p><strong><font size'3'><a href='http://unstats.un.org/unsd/cdb/cdb_dict_xrxx.asp?def_code=63'>GDP</a> per capita (PPP US$):</font></strong> 16459 </p><p><font size='3'><strong>2006 <a href='http://hdr.undp.org/hdr2006/statistics/indices/default.cfm' target='_blank'>Human Development Index</a> (Rank 1-177):</strong> </font>42 </p></td> </tr> </table></td> </tr> <tr> <td align='left' valign='top'><font color='#003F7C' size='5'><strong>Helping others</strong></font></td> </tr> <tr> <td align='left' valign='top'><p><font color='#000000'>Since the Slovak republic is on track to meet most MDGs by 2015, the country is now concentrating its efforts on providing assistance to poorer developing countries. In 2003, the Slovak Ministry of Foreign Affairs and UNDP set up a trust fund to provide Official Development Assistance for poorer countries. Slovakia is still working on a set of adapted MDGs that are designed to serve more vulnerable sections of its own population.</font></p></td> </tr> <tr> <td align='left' valign='top'><a href='http://www.mdgmonitor.org/factsheets_00.cfm?c=SVK'>Read more... </a></td> </tr> <tr> <td align='right' valign='top'><p>Read related articles on <a href='http://news.google.com/news?hl=en&ned=us&ie=UTF-8&q=%22Slovakia%22+%22millennium+development+goals%22'>Google News</a></p></td> </tr> <tr> <td align='right' valign='top'>&nbsp;</td> </tr> <tr> <td align='center'><table border='0' cellpadding='0' cellspacing='0'> <tr> <td align='right' valign='middle'><a href='http://www.un.org/'><img src='files/un_logo_small.png' alt='UN logo' border='0' /></a></td> <td align='left' valign='middle'><font color='#666666'>The  <a href="http://www.un.org/millenniumgoals/" target="_blank">Millennium Development Goals </a>(MDGs) were laid out by the leaders of the world in 2000. They include  halving extreme poverty, halting the spread of HIV/AIDS and   providing universal primary education, all by 2015.</font></td> </tr> </table></td> </tr> </table>]]></description>
			<styleUrl>#text_photo_banner</styleUrl>
			<Point>
				<coordinates>17.129999,48.15999900000001,0</coordinates>
			</Point>
		</Placemark>
		<Placemark>
			<name>Slovenia</name>
			<visibility>0</visibility>
			<address>http://www.mdgmonitor.org/factsheets_00.cfm?c=SVN</address>
			<Snippet maxLines="2"></Snippet>
			<description><![CDATA[<table width='350' border='0' cellpadding='3' cellspacing='0' bgcolor='#FFFFFF'> <tr> <td align='left'><table border='0' cellspacing='0' cellpadding='0'> <tr> <td rowspan='2' align='left' valign='middle'><a href='http://www.mdgmonitor.org/'><img src='files/mdg_logo.png' alt='mdp logo' border='0' /></a></td> <td align='left' valign='bottom'><font color='#00486D' size='6'><b>MDG</b>MONITOR</td> </tr> <tr> <td align='right' valign='top'><font color='#00486D' size='4'>Track. Learn. Support.</font></td> </tr> </table></td> </tr> <tr> <td align='left' valign='top' bgcolor='#003F7C'><font color='#FFFFFF' size='5'><strong>Slovenia</strong></font></td> </tr> <tr> <td align='left' valign='top'><table border='0' cellspacing='0' cellpadding='0'> <tr> <td align='left' valign='top'><a href='http://www.mdgmonitor.org/factsheets_00.cfm?c=SVN'><img src='files/slovenia.jpg' alt='image' width='200' border='0' align='left' /></a></td> <td align='left' valign='middle'><p><strong><font size='3'>Total Population (millions):</font> </strong>1.97</p><p><strong><font size'3'><a href='http://unstats.un.org/unsd/cdb/cdb_dict_xrxx.asp?def_code=63'>GDP</a> per capita (PPP US$):</font></strong> 22292 </p><p><font size='3'><strong>2006 <a href='http://hdr.undp.org/hdr2006/statistics/indices/default.cfm' target='_blank'>Human Development Index</a> (Rank 1-177):</strong> </font>27 </p></td> </tr> </table></td> </tr> <tr> <td align='left' valign='top'><font color='#003F7C' size='5'><strong>Joining the donor community</strong></font></td> </tr> <tr> <td align='left' valign='top'><p><font color='#000000'>Slovenia, after meeting targets for the first seven MDGs, has switched its focus to providing development assistance to poor countries. To meet its obligations as a donor country, the government has been working with all the national stakeholders involved to put in place the national framework for delivery of its assistance.  Even in light of the country’s MDG success, Slovenia has designated additional targets for goals one through seven that address problems facing vulnerable groups of the population.</font></p></td> </tr> <tr> <td align='left' valign='top'><a href='http://www.mdgmonitor.org/factsheets_00.cfm?c=SVN'>Read more... </a></td> </tr> <tr> <td align='right' valign='top'><p>Read related articles on <a href='http://news.google.com/news?hl=en&ned=us&ie=UTF-8&q=Slovenia+%22millennium+development+goals%22'>Google News</a></p></td> </tr> <tr> <td align='right' valign='top'>&nbsp;</td> </tr> <tr> <td align='center'><table border='0' cellpadding='0' cellspacing='0'> <tr> <td align='right' valign='middle'><a href='http://www.un.org/'><img src='files/un_logo_small.png' alt='UN logo' border='0' /></a></td> <td align='left' valign='middle'><font color='#666666'>The  <a href="http://www.un.org/millenniumgoals/" target="_blank">Millennium Development Goals </a>(MDGs) were laid out by the leaders of the world in 2000. They include  halving extreme poverty, halting the spread of HIV/AIDS and   providing universal primary education, all by 2015.</font></td> </tr> </table></td> </tr> </table>]]></description>
			<styleUrl>#text_photo_banner</styleUrl>
			<Point>
				<coordinates>14.50578358,46.05153605000001,0</coordinates>
			</Point>
		</Placemark>
		<Placemark>
			<name>Somalia</name>
			<visibility>0</visibility>
			<address>http://www.mdgmonitor.org/factsheets_00.cfm?c=SOM</address>
			<Snippet maxLines="2"></Snippet>
			<description><![CDATA[<table width='350' border='0' cellpadding='3' cellspacing='0' bgcolor='#FFFFFF'> <tr> <td align='left'><table border='0' cellspacing='0' cellpadding='0'> <tr> <td rowspan='2' align='left' valign='middle'><a href='http://www.mdgmonitor.org/'><img src='files/mdg_logo.png' alt='mdp logo' border='0' /></a></td> <td align='left' valign='bottom'><font color='#00486D' size='6'><b>MDG</b>MONITOR</td> </tr> <tr> <td align='right' valign='top'><font color='#00486D' size='4'>Track. Learn. Support.</font></td> </tr> </table></td> </tr> <tr> <td align='left' valign='top' bgcolor='#003F7C'><font color='#FFFFFF' size='5'><strong>Somalia</strong></font></td> </tr> <tr> <td align='left' valign='top'><table border='0' cellspacing='0' cellpadding='0'> <tr> <td align='left' valign='top'><a href='http://www.mdgmonitor.org/factsheets_00.cfm?c=SOM'><img src='files/somalia.jpg' alt='image' width='200' border='0' align='left' /></a></td> <td align='left' valign='middle'><p><strong><font size='3'>Total Population (millions):</font> </strong>8.23</p><p><strong><font size'3'><a href='http://unstats.un.org/unsd/cdb/cdb_dict_xrxx.asp?def_code=63'>GDP</a> per capita (PPP US$):</font></strong> NA </p><p><font size='3'><strong>2006 <a href='http://hdr.undp.org/hdr2006/statistics/indices/default.cfm' target='_blank'>Human Development Index</a> (Rank 1-177):</strong> </font>NA </p></td> </tr> </table></td> </tr> <tr> <td align='left' valign='top'><font color='#003F7C' size='5'><strong>Lack in national capacities</strong></font></td> </tr> <tr> <td align='left' valign='top'><p><font color='#000000'>Somalia has implemented a number of programmes and interventions, allowing some progress in increasing primary-education enrolment, reducing child mortality, improving maternal health and alleviating extreme poverty and hunger. However, combined with a shortage of resources and facilities providing basic social services, lack of national capacity has been slowing down the development process. The main challenges include:  human rights abuses, unsustainable management of natural resources, high vulnerability to drought and floods, limited reconstruction and development assistance, prevailing conflict and insecurity in many parts of the country, and poor national and local institutional capacity.</font></p></td> </tr> <tr> <td align='left' valign='top'><a href='http://www.mdgmonitor.org/factsheets_00.cfm?c=SOM'>Read more... </a></td> </tr> <tr> <td align='right' valign='top'><p>Read related articles on <a href='http://news.google.com/archivesearch?hl=en&ned=us&ie=UTF-8&q=%22Somalia+%22+%22millennium+development+goals%22'>Google News</a></p></td> </tr> <tr> <td align='right' valign='top'>&nbsp;</td> </tr> <tr> <td align='center'><table border='0' cellpadding='0' cellspacing='0'> <tr> <td align='right' valign='middle'><a href='http://www.un.org/'><img src='files/un_logo_small.png' alt='UN logo' border='0' /></a></td> <td align='left' valign='middle'><font color='#666666'>The  <a href="http://www.un.org/millenniumgoals/" target="_blank">Millennium Development Goals </a>(MDGs) were laid out by the leaders of the world in 2000. They include  halving extreme poverty, halting the spread of HIV/AIDS and   providing universal primary education, all by 2015.</font></td> </tr> </table></td> </tr> </table>]]></description>
			<styleUrl>#text_photo_banner</styleUrl>
			<Point>
				<coordinates>45.34215751000001,2.039259122,0</coordinates>
			</Point>
		</Placemark>
		<Placemark>
			<name>Sri Lanka</name>
			<visibility>0</visibility>
			<address>http://www.mdgmonitor.org/factsheets_00.cfm?c=LKA</address>
			<Snippet maxLines="2"></Snippet>
			<description><![CDATA[<table width='350' border='0' cellpadding='3' cellspacing='0' bgcolor='#FFFFFF'> <tr> <td align='left'><table border='0' cellspacing='0' cellpadding='0'> <tr> <td rowspan='2' align='left' valign='middle'><a href='http://www.mdgmonitor.org/'><img src='files/mdg_logo.png' alt='mdp logo' border='0' /></a></td> <td align='left' valign='bottom'><font color='#00486D' size='6'><b>MDG</b>MONITOR</td> </tr> <tr> <td align='right' valign='top'><font color='#00486D' size='4'>Track. Learn. Support.</font></td> </tr> </table></td> </tr> <tr> <td align='left' valign='top' bgcolor='#003F7C'><font color='#FFFFFF' size='5'><strong>Sri Lanka</strong></font></td> </tr> <tr> <td align='left' valign='top'><table border='0' cellspacing='0' cellpadding='0'> <tr> <td align='left' valign='top'><a href='http://www.mdgmonitor.org/factsheets_00.cfm?c=LKA'><img src='files/srilanka.jpg' alt='image' width='200' border='0' align='left' /></a></td> <td align='left' valign='middle'><p><strong><font size='3'>Total Population (millions):</font> </strong>20.74</p><p><strong><font size'3'><a href='http://unstats.un.org/unsd/cdb/cdb_dict_xrxx.asp?def_code=63'>GDP</a> per capita (PPP US$):</font></strong> 4569 </p><p><font size='3'><strong>2006 <a href='http://hdr.undp.org/hdr2006/statistics/indices/default.cfm' target='_blank'>Human Development Index</a> (Rank 1-177):</strong> </font>93 </p></td> </tr> </table></td> </tr> <tr> <td align='left' valign='top'><font color='#003F7C' size='5'><strong>On track</strong></font></td> </tr> <tr> <td align='left' valign='top'><p><font color='#000000'>On track to achieve most of the MDGs, Sri Lanka has long been viewed as a model developing country: it has achieved noticeable success in attaining high levels of male and female literacy rates, school enrolment and health coverage, despite its low level of per capita income. Still, malnutrition is prevalent in most of Sri Lanka’s districts, with more than 50 per cent of the population below the minimum level of dietary energy consumption, and gender-based violence remains an issue calling for immediate action.</font></p></td> </tr> <tr> <td align='left' valign='top'><a href='http://www.mdgmonitor.org/factsheets_00.cfm?c=LKA'>Read more... </a></td> </tr> <tr> <td align='right' valign='top'><p>Read related articles on <a href='http://news.google.com/news?hl=en&ned=us&ie=UTF-8&q=%22Sri+Lanka+%22+%22millennium+development+goals%22'>Google News</a></p></td> </tr> <tr> <td align='right' valign='top'>&nbsp;</td> </tr> <tr> <td align='center'><table border='0' cellpadding='0' cellspacing='0'> <tr> <td align='right' valign='middle'><a href='http://www.un.org/'><img src='files/un_logo_small.png' alt='UN logo' border='0' /></a></td> <td align='left' valign='middle'><font color='#666666'>The  <a href="http://www.un.org/millenniumgoals/" target="_blank">Millennium Development Goals </a>(MDGs) were laid out by the leaders of the world in 2000. They include  halving extreme poverty, halting the spread of HIV/AIDS and   providing universal primary education, all by 2015.</font></td> </tr> </table></td> </tr> </table>]]></description>
			<styleUrl>#text_photo_banner</styleUrl>
			<Point>
				<coordinates>79.84499477,6.936200254,0</coordinates>
			</Point>
		</Placemark>
		<Placemark>
			<name>Sudan</name>
			<visibility>0</visibility>
			<address>http://www.mdgmonitor.org/factsheets_00.cfm?c=SDN</address>
			<Snippet maxLines="2"></Snippet>
			<description><![CDATA[<table width='350' border='0' cellpadding='3' cellspacing='0' bgcolor='#FFFFFF'> <tr> <td align='left'><table border='0' cellspacing='0' cellpadding='0'> <tr> <td rowspan='2' align='left' valign='middle'><a href='http://www.mdgmonitor.org/'><img src='files/mdg_logo.png' alt='mdp logo' border='0' /></a></td> <td align='left' valign='bottom'><font color='#00486D' size='6'><b>MDG</b>MONITOR</td> </tr> <tr> <td align='right' valign='top'><font color='#00486D' size='4'>Track. Learn. Support.</font></td> </tr> </table></td> </tr> <tr> <td align='left' valign='top' bgcolor='#003F7C'><font color='#FFFFFF' size='5'><strong>Sudan</strong></font></td> </tr> <tr> <td align='left' valign='top'><table border='0' cellspacing='0' cellpadding='0'> <tr> <td align='left' valign='top'><a href='http://www.mdgmonitor.org/factsheets_00.cfm?c=SDN'><img src='files/sudan.jpg' alt='image' width='200' border='0' align='left' /></a></td> <td align='left' valign='middle'><p><strong><font size='3'>Total Population (millions):</font> </strong>36.23</p><p><strong><font size'3'><a href='http://unstats.un.org/unsd/cdb/cdb_dict_xrxx.asp?def_code=63'>GDP</a> per capita (PPP US$):</font></strong> 2151 </p><p><font size='3'><strong>2006 <a href='http://hdr.undp.org/hdr2006/statistics/indices/default.cfm' target='_blank'>Human Development Index</a> (Rank 1-177):</strong> </font>141 </p></td> </tr> </table></td> </tr> <tr> <td align='left' valign='top'><font color='#003F7C' size='5'><strong>Pockets of violence: a possible obstacle</strong></font></td> </tr> <tr> <td align='left' valign='top'><p><font color='#000000'>Sudan continues to prioritize the incorporation of the MDGs into its strategic planning framework. Despite only moderate MDG progress so far, the goals have been incorporated into the African country’s five-year strategy plan and are supported at both the national level and in regional policies and plans. Nonetheless, unreliable information systems, poor infrastructure and pockets of violence could make meeting all eight MDGs by 2015 a challenge for Sudan.</font></p></td> </tr> <tr> <td align='left' valign='top'><a href='http://www.mdgmonitor.org/factsheets_00.cfm?c=SDN'>Read more... </a></td> </tr> <tr> <td align='right' valign='top'><p>Read related articles on <a href='http://news.google.com/news?hl=en&ned=us&ie=UTF-8&q=%22Sudan+%22+%22millennium+development+goals%22'>Google News</a></p></td> </tr> <tr> <td align='right' valign='top'>&nbsp;</td> </tr> <tr> <td align='center'><table border='0' cellpadding='0' cellspacing='0'> <tr> <td align='right' valign='middle'><a href='http://www.un.org/'><img src='files/un_logo_small.png' alt='UN logo' border='0' /></a></td> <td align='left' valign='middle'><font color='#666666'>The  <a href="http://www.un.org/millenniumgoals/" target="_blank">Millennium Development Goals </a>(MDGs) were laid out by the leaders of the world in 2000. They include  halving extreme poverty, halting the spread of HIV/AIDS and   providing universal primary education, all by 2015.</font></td> </tr> </table></td> </tr> </table>]]></description>
			<styleUrl>#text_photo_banner</styleUrl>
			<Point>
				<coordinates>32.52,15.579999,0</coordinates>
			</Point>
		</Placemark>
		<Placemark>
			<name>Suriname</name>
			<visibility>0</visibility>
			<address>http://www.mdgmonitor.org/factsheets_00.cfm?c=SUR</address>
			<Snippet maxLines="2"></Snippet>
			<description><![CDATA[<table width='350' border='0' cellpadding='3' cellspacing='0' bgcolor='#FFFFFF'> <tr> <td align='left'><table border='0' cellspacing='0' cellpadding='0'> <tr> <td rowspan='2' align='left' valign='middle'><a href='http://www.mdgmonitor.org/'><img src='files/mdg_logo.png' alt='mdp logo' border='0' /></a></td> <td align='left' valign='bottom'><font color='#00486D' size='6'><b>MDG</b>MONITOR</td> </tr> <tr> <td align='right' valign='top'><font color='#00486D' size='4'>Track. Learn. Support.</font></td> </tr> </table></td> </tr> <tr> <td align='left' valign='top' bgcolor='#003F7C'><font color='#FFFFFF' size='5'><strong>Suriname</strong></font></td> </tr> <tr> <td align='left' valign='top'><table border='0' cellspacing='0' cellpadding='0'> <tr> <td align='left' valign='top'><a href='http://www.mdgmonitor.org/factsheets_00.cfm?c=SUR'><img src='files/suriname.jpg' alt='image' width='200' border='0' align='left' /></a></td> <td align='left' valign='middle'><p><strong><font size='3'>Total Population (millions):</font> </strong>0.45</p><p><strong><font size'3'><a href='http://unstats.un.org/unsd/cdb/cdb_dict_xrxx.asp?def_code=63'>GDP</a> per capita (PPP US$):</font></strong> NA </p><p><font size='3'><strong>2006 <a href='http://hdr.undp.org/hdr2006/statistics/indices/default.cfm' target='_blank'>Human Development Index</a> (Rank 1-177):</strong> </font>89 </p></td> </tr> </table></td> </tr> <tr> <td align='left' valign='top'><font color='#003F7C' size='5'><strong>Raising awareness as an important tool</strong></font></td> </tr> <tr> <td align='left' valign='top'><p><font color='#000000'>Building MDG awareness among Suriname’s youth, residents and civil society organizations remains a priority for the Caribbean country, which boasts a net ratio of 92.4 percent for primary education enrolment. Progress has been most consistent in the areas of achieving universal primary education, reducing child mortality, and fighting HIV/AIDS and malaria. Of concern are improving poverty reduction, gender equality, maternal health, and environmental sustainability.</font></p></td> </tr> <tr> <td align='left' valign='top'><a href='http://www.mdgmonitor.org/factsheets_00.cfm?c=SUR'>Read more... </a></td> </tr> <tr> <td align='right' valign='top'><p>Read related articles on <a href='http://news.google.com/news?hl=en&ned=us&ie=UTF-8&q=Suriname+%22millennium+development+goals%22'>Google News</a></p></td> </tr> <tr> <td align='right' valign='top'>&nbsp;</td> </tr> <tr> <td align='center'><table border='0' cellpadding='0' cellspacing='0'> <tr> <td align='right' valign='middle'><a href='http://www.un.org/'><img src='files/un_logo_small.png' alt='UN logo' border='0' /></a></td> <td align='left' valign='middle'><font color='#666666'>The  <a href="http://www.un.org/millenniumgoals/" target="_blank">Millennium Development Goals </a>(MDGs) were laid out by the leaders of the world in 2000. They include  halving extreme poverty, halting the spread of HIV/AIDS and   providing universal primary education, all by 2015.</font></td> </tr> </table></td> </tr> </table>]]></description>
			<styleUrl>#text_photo_banner</styleUrl>
			<Point>
				<coordinates>-55.16547869000001,5.820879475,0</coordinates>
			</Point>
		</Placemark>
		<Placemark>
			<name>Swaziland</name>
			<visibility>0</visibility>
			<address>http://www.mdgmonitor.org/factsheets_00.cfm?c=SWZ</address>
			<Snippet maxLines="2"></Snippet>
			<description><![CDATA[<table width='350' border='0' cellpadding='3' cellspacing='0' bgcolor='#FFFFFF'> <tr> <td align='left'><table border='0' cellspacing='0' cellpadding='0'> <tr> <td rowspan='2' align='left' valign='middle'><a href='http://www.mdgmonitor.org/'><img src='files/mdg_logo.png' alt='mdp logo' border='0' /></a></td> <td align='left' valign='bottom'><font color='#00486D' size='6'><b>MDG</b>MONITOR</td> </tr> <tr> <td align='right' valign='top'><font color='#00486D' size='4'>Track. Learn. Support.</font></td> </tr> </table></td> </tr> <tr> <td align='left' valign='top' bgcolor='#003F7C'><font color='#FFFFFF' size='5'><strong>Swaziland</strong></font></td> </tr> <tr> <td align='left' valign='top'><table border='0' cellspacing='0' cellpadding='0'> <tr> <td align='left' valign='top'><a href='http://www.mdgmonitor.org/factsheets_00.cfm?c=SWZ'><img src='files/swaziland.jpg' alt='image' width='200' border='0' align='left' /></a></td> <td align='left' valign='middle'><p><strong><font size='3'>Total Population (millions):</font> </strong>1.03</p><p><strong><font size'3'><a href='http://unstats.un.org/unsd/cdb/cdb_dict_xrxx.asp?def_code=63'>GDP</a> per capita (PPP US$):</font></strong> 5137 </p><p><font size='3'><strong>2006 <a href='http://hdr.undp.org/hdr2006/statistics/indices/default.cfm' target='_blank'>Human Development Index</a> (Rank 1-177):</strong> </font>146 </p></td> </tr> </table></td> </tr> <tr> <td align='left' valign='top'><font color='#003F7C' size='5'><strong>HIV/AIDS as the biggest challenge</strong></font></td> </tr> <tr> <td align='left' valign='top'><p><font color='#000000'>A national awareness campaign, accurate needs assessments, and sectoral interventions are central to the Swaziland government’s plan to accelerate MDG progress. The biggest challenges facing the country are the HIV/AIDS pandemic, the high rate of poverty, and gender and income inequality. Although efforts are under way to address all these problems, a significant acceleration of interventions is required if the country is to have a realistic chance of attaining the MDGs by 2015.</font></p></td> </tr> <tr> <td align='left' valign='top'><a href='http://www.mdgmonitor.org/factsheets_00.cfm?c=SWZ'>Read more... </a></td> </tr> <tr> <td align='right' valign='top'><p>Read related articles on <a href='http://news.google.com/archivesearch?hl=en&ned=us&ie=UTF-8&q=Swaziland+%22millennium+development+goals%22'>Google News</a></p></td> </tr> <tr> <td align='right' valign='top'>&nbsp;</td> </tr> <tr> <td align='center'><table border='0' cellpadding='0' cellspacing='0'> <tr> <td align='right' valign='middle'><a href='http://www.un.org/'><img src='files/un_logo_small.png' alt='UN logo' border='0' /></a></td> <td align='left' valign='middle'><font color='#666666'>The  <a href="http://www.un.org/millenniumgoals/" target="_blank">Millennium Development Goals </a>(MDGs) were laid out by the leaders of the world in 2000. They include  halving extreme poverty, halting the spread of HIV/AIDS and   providing universal primary education, all by 2015.</font></td> </tr> </table></td> </tr> </table>]]></description>
			<styleUrl>#text_photo_banner</styleUrl>
			<Point>
				<coordinates>31.14328281,-26.32309484,0</coordinates>
			</Point>
		</Placemark>
		<Placemark>
			<name>Syrian Arab Republic (Syria)</name>
			<visibility>0</visibility>
			<address>http://www.mdgmonitor.org/factsheets_00.cfm?c=SYR</address>
			<Snippet maxLines="2"></Snippet>
			<description><![CDATA[<table width='350' border='0' cellpadding='3' cellspacing='0' bgcolor='#FFFFFF'> <tr> <td align='left'><table border='0' cellspacing='0' cellpadding='0'> <tr> <td rowspan='2' align='left' valign='middle'><a href='http://www.mdgmonitor.org/'><img src='files/mdg_logo.png' alt='mdp logo' border='0' /></a></td> <td align='left' valign='bottom'><font color='#00486D' size='6'><b>MDG</b>MONITOR</td> </tr> <tr> <td align='right' valign='top'><font color='#00486D' size='4'>Track. Learn. Support.</font></td> </tr> </table></td> </tr> <tr> <td align='left' valign='top' bgcolor='#003F7C'><font color='#FFFFFF' size='5'><strong>Syrian Arab Republic (Syria)</strong></font></td> </tr> <tr> <td align='left' valign='top'><table border='0' cellspacing='0' cellpadding='0'> <tr> <td align='left' valign='top'><a href='http://www.mdgmonitor.org/factsheets_00.cfm?c=SYR'><img src='files/syria.jpg' alt='image' width='200' border='0' align='left' /></a></td> <td align='left' valign='middle'><p><strong><font size='3'>Total Population (millions):</font> </strong>19.04</p><p><strong><font size'3'><a href='http://unstats.un.org/unsd/cdb/cdb_dict_xrxx.asp?def_code=63'>GDP</a> per capita (PPP US$):</font></strong> 3842 </p><p><font size='3'><strong>2006 <a href='http://hdr.undp.org/hdr2006/statistics/indices/default.cfm' target='_blank'>Human Development Index</a> (Rank 1-177):</strong> </font>107 </p></td> </tr> </table></td> </tr> <tr> <td align='left' valign='top'><font color='#003F7C' size='5'><strong>On track for most of the MDGs</strong></font></td> </tr> <tr> <td align='left' valign='top'><p><font color='#000000'>With 98 percent of children immunized against measles, 94.5 percent of children enroled in primary school and 12 percent of parliamentary seats held by women, Syria remains on track to achieve nearly all of the MDGs by 2015.  Nonetheless, some regional disparities still remain:  97.1 percent of people had access to safe drinking water in urban areas, but only 76.3 percent had access in rural areas; similarly, the female literacy rate for 15 to 24-year-olds were as low as 68.9 percent in some rural areas, but the national literacy rate registered at 92.5 percent.</font></p></td> </tr> <tr> <td align='left' valign='top'><a href='http://www.mdgmonitor.org/factsheets_00.cfm?c=SYR'>Read more... </a></td> </tr> <tr> <td align='right' valign='top'><p>Read related articles on <a href='http://news.google.com/news?hl=en&ned=us&ie=UTF-8&q=Syria+%22millennium+development+goals%22'>Google News</a></p></td> </tr> <tr> <td align='right' valign='top'>&nbsp;</td> </tr> <tr> <td align='center'><table border='0' cellpadding='0' cellspacing='0'> <tr> <td align='right' valign='middle'><a href='http://www.un.org/'><img src='files/un_logo_small.png' alt='UN logo' border='0' /></a></td> <td align='left' valign='middle'><font color='#666666'>The  <a href="http://www.un.org/millenniumgoals/" target="_blank">Millennium Development Goals </a>(MDGs) were laid out by the leaders of the world in 2000. They include  halving extreme poverty, halting the spread of HIV/AIDS and   providing universal primary education, all by 2015.</font></td> </tr> </table></td> </tr> </table>]]></description>
			<styleUrl>#text_photo_banner</styleUrl>
			<Point>
				<coordinates>36.30008079,33.5146241,0</coordinates>
			</Point>
		</Placemark>
		<Placemark>
			<name>Tajikistan</name>
			<visibility>0</visibility>
			<address>http://www.mdgmonitor.org/factsheets_00.cfm?c=TJK</address>
			<Snippet maxLines="2"></Snippet>
			<description><![CDATA[<table width='350' border='0' cellpadding='3' cellspacing='0' bgcolor='#FFFFFF'> <tr> <td align='left'><table border='0' cellspacing='0' cellpadding='0'> <tr> <td rowspan='2' align='left' valign='middle'><a href='http://www.mdgmonitor.org/'><img src='files/mdg_logo.png' alt='mdp logo' border='0' /></a></td> <td align='left' valign='bottom'><font color='#00486D' size='6'><b>MDG</b>MONITOR</td> </tr> <tr> <td align='right' valign='top'><font color='#00486D' size='4'>Track. Learn. Support.</font></td> </tr> </table></td> </tr> <tr> <td align='left' valign='top' bgcolor='#003F7C'><font color='#FFFFFF' size='5'><strong>Tajikistan</strong></font></td> </tr> <tr> <td align='left' valign='top'><table border='0' cellspacing='0' cellpadding='0'> <tr> <td align='left' valign='top'><a href='http://www.mdgmonitor.org/factsheets_00.cfm?c=TJK'><img src='files/tajikistan.jpg' alt='image' width='200' border='0' align='left' /></a></td> <td align='left' valign='middle'><p><strong><font size='3'>Total Population (millions):</font> </strong>6.51</p><p><strong><font size'3'><a href='http://unstats.un.org/unsd/cdb/cdb_dict_xrxx.asp?def_code=63'>GDP</a> per capita (PPP US$):</font></strong> 1311 </p><p><font size='3'><strong>2006 <a href='http://hdr.undp.org/hdr2006/statistics/indices/default.cfm' target='_blank'>Human Development Index</a> (Rank 1-177):</strong> </font>122 </p></td> </tr> </table></td> </tr> <tr> <td align='left' valign='top'><font color='#003F7C' size='5'><strong>Significant growth</strong></font></td> </tr> <tr> <td align='left' valign='top'><p><font color='#000000'>The annual GDP growth of 7.5 percent has been a strong foundation for poverty reduction in Tajikstan, where only 7 percent of the country survives on less than $1 per day. With 96.7 percent of children enrolled in primary education, the country is also on track to achieve universal primary education by 2015. Poor government management, however, has hindered the achievement of the nation’s health-related goals: only 59 percent of the population has access to clean drinking water, and 100 in 10,000 mothers die while giving birth.</font></p></td> </tr> <tr> <td align='left' valign='top'><a href='http://www.mdgmonitor.org/factsheets_00.cfm?c=TJK'>Read more... </a></td> </tr> <tr> <td align='right' valign='top'><p>Read related articles on <a href='http://news.google.com/archivesearch?hl=en&ned=us&ie=UTF-8&q=Tajikistan+%22millennium+development+goals%22'>Google News</a></p></td> </tr> <tr> <td align='right' valign='top'>&nbsp;</td> </tr> <tr> <td align='center'><table border='0' cellpadding='0' cellspacing='0'> <tr> <td align='right' valign='middle'><a href='http://www.un.org/'><img src='files/un_logo_small.png' alt='UN logo' border='0' /></a></td> <td align='left' valign='middle'><font color='#666666'>The  <a href="http://www.un.org/millenniumgoals/" target="_blank">Millennium Development Goals </a>(MDGs) were laid out by the leaders of the world in 2000. They include  halving extreme poverty, halting the spread of HIV/AIDS and   providing universal primary education, all by 2015.</font></td> </tr> </table></td> </tr> </table>]]></description>
			<styleUrl>#text_photo_banner</styleUrl>
			<Point>
				<coordinates>68.78657649000002,38.57416599,0</coordinates>
			</Point>
		</Placemark>
		<Placemark>
			<name>Tanzania, United Republic of</name>
			<visibility>0</visibility>
			<address>http://www.mdgmonitor.org/factsheets_00.cfm?c=TZA</address>
			<Snippet maxLines="2"></Snippet>
			<description><![CDATA[<table width='350' border='0' cellpadding='3' cellspacing='0' bgcolor='#FFFFFF'> <tr> <td align='left'><table border='0' cellspacing='0' cellpadding='0'> <tr> <td rowspan='2' align='left' valign='middle'><a href='http://www.mdgmonitor.org/'><img src='files/mdg_logo.png' alt='mdp logo' border='0' /></a></td> <td align='left' valign='bottom'><font color='#00486D' size='6'><b>MDG</b>MONITOR</td> </tr> <tr> <td align='right' valign='top'><font color='#00486D' size='4'>Track. Learn. Support.</font></td> </tr> </table></td> </tr> <tr> <td align='left' valign='top' bgcolor='#003F7C'><font color='#FFFFFF' size='5'><strong>Tanzania, United Republic of</strong></font></td> </tr> <tr> <td align='left' valign='top'><table border='0' cellspacing='0' cellpadding='0'> <tr> <td align='left' valign='top'><a href='http://www.mdgmonitor.org/factsheets_00.cfm?c=TZA'><img src='files/tanzania.JPG' alt='image' width='200' border='0' align='left' /></a></td> <td align='left' valign='middle'><p><strong><font size='3'>Total Population (millions):</font> </strong>38.33</p><p><strong><font size'3'><a href='http://unstats.un.org/unsd/cdb/cdb_dict_xrxx.asp?def_code=63'>GDP</a> per capita (PPP US$):</font></strong> 730 </p><p><font size='3'><strong>2006 <a href='http://hdr.undp.org/hdr2006/statistics/indices/default.cfm' target='_blank'>Human Development Index</a> (Rank 1-177):</strong> </font>162 </p></td> </tr> </table></td> </tr> <tr> <td align='left' valign='top'><font color='#003F7C' size='5'><strong>Impressive growth, including rural</strong></font></td> </tr> <tr> <td align='left' valign='top'><p><font color='#000000'>Impressive growth in gross domestic product, institutional reforms and the transformation of the rural economy suggest that the United Republic of Tanzania could meet goal one by 2015, despite the fact that 58 percent of the population survives on less than $1 per day.  Even so, the African country has seen significant reductions in child mortality rates, with 94 percent of children receiving measles immunizations.</font></p></td> </tr> <tr> <td align='left' valign='top'><a href='http://www.mdgmonitor.org/factsheets_00.cfm?c=TZA'>Read more... </a></td> </tr> <tr> <td align='right' valign='top'><p>Read related articles on <a href='http://news.google.com/news?hl=en&ned=us&ie=UTF-8&q=Tanzania+%22millennium+development+goals%22'>Google News</a></p></td> </tr> <tr> <td align='right' valign='top'>&nbsp;</td> </tr> <tr> <td align='center'><table border='0' cellpadding='0' cellspacing='0'> <tr> <td align='right' valign='middle'><a href='http://www.un.org/'><img src='files/un_logo_small.png' alt='UN logo' border='0' /></a></td> <td align='left' valign='middle'><font color='#666666'>The  <a href="http://www.un.org/millenniumgoals/" target="_blank">Millennium Development Goals </a>(MDGs) were laid out by the leaders of the world in 2000. They include  halving extreme poverty, halting the spread of HIV/AIDS and   providing universal primary education, all by 2015.</font></td> </tr> </table></td> </tr> </table>]]></description>
			<styleUrl>#text_photo_banner</styleUrl>
			<Point>
				<coordinates>35.7382,-6.17485,0</coordinates>
			</Point>
		</Placemark>
		<Placemark>
			<name>Thailand</name>
			<visibility>0</visibility>
			<address>http://www.mdgmonitor.org/factsheets_00.cfm?c=THA</address>
			<Snippet maxLines="2"></Snippet>
			<description><![CDATA[<table width='350' border='0' cellpadding='3' cellspacing='0' bgcolor='#FFFFFF'> <tr> <td align='left'><table border='0' cellspacing='0' cellpadding='0'> <tr> <td rowspan='2' align='left' valign='middle'><a href='http://www.mdgmonitor.org/'><img src='files/mdg_logo.png' alt='mdp logo' border='0' /></a></td> <td align='left' valign='bottom'><font color='#00486D' size='6'><b>MDG</b>MONITOR</td> </tr> <tr> <td align='right' valign='top'><font color='#00486D' size='4'>Track. Learn. Support.</font></td> </tr> </table></td> </tr> <tr> <td align='left' valign='top' bgcolor='#003F7C'><font color='#FFFFFF' size='5'><strong>Thailand</strong></font></td> </tr> <tr> <td align='left' valign='top'><table border='0' cellspacing='0' cellpadding='0'> <tr> <td align='left' valign='top'><a href='http://www.mdgmonitor.org/factsheets_00.cfm?c=THA'><img src='files/thailand.jpg' alt='image' width='200' border='0' align='left' /></a></td> <td align='left' valign='middle'><p><strong><font size='3'>Total Population (millions):</font> </strong>64.23</p><p><strong><font size'3'><a href='http://unstats.un.org/unsd/cdb/cdb_dict_xrxx.asp?def_code=63'>GDP</a> per capita (PPP US$):</font></strong> 8551 </p><p><font size='3'><strong>2006 <a href='http://hdr.undp.org/hdr2006/statistics/indices/default.cfm' target='_blank'>Human Development Index</a> (Rank 1-177):</strong> </font>74 </p></td> </tr> </table></td> </tr> <tr> <td align='left' valign='top'><font color='#003F7C' size='5'><strong>Women's empowerment on the agenda</strong></font></td> </tr> <tr> <td align='left' valign='top'><p><font color='#000000'>After successfully achieving the MDGs on a national level, Thailand has shifted its focus to empowering women and promoting gender equality nationwide. Prior to the coup d’état in September 2006, the number of female senators had doubled. Despite this national success, local and regional development issues still remain: it has been difficult to reach people in very remote areas; and disparities between achievements at the national and provincial levels are still wide.</font></p></td> </tr> <tr> <td align='left' valign='top'><a href='http://www.mdgmonitor.org/factsheets_00.cfm?c=THA'>Read more... </a></td> </tr> <tr> <td align='right' valign='top'><p>Read related articles on <a href='http://news.google.com/news?hl=en&ned=us&ie=UTF-8&q=Thailand+%22millennium+development+goals%22'>Google News</a></p></td> </tr> <tr> <td align='right' valign='top'>&nbsp;</td> </tr> <tr> <td align='center'><table border='0' cellpadding='0' cellspacing='0'> <tr> <td align='right' valign='middle'><a href='http://www.un.org/'><img src='files/un_logo_small.png' alt='UN logo' border='0' /></a></td> <td align='left' valign='middle'><font color='#666666'>The  <a href="http://www.un.org/millenniumgoals/" target="_blank">Millennium Development Goals </a>(MDGs) were laid out by the leaders of the world in 2000. They include  halving extreme poverty, halting the spread of HIV/AIDS and   providing universal primary education, all by 2015.</font></td> </tr> </table></td> </tr> </table>]]></description>
			<styleUrl>#text_photo_banner</styleUrl>
			<Point>
				<coordinates>100.5018099,13.75653223,0</coordinates>
			</Point>
		</Placemark>
		<Placemark>
			<name>Timor-Leste (East Timor)</name>
			<visibility>0</visibility>
			<address>http://www.mdgmonitor.org/factsheets_00.cfm?c=TMP</address>
			<Snippet maxLines="2"></Snippet>
[truncated: 10,045,293 more chars]
