# Supplementary material
Source: MDPI journal article supplement (https://www.mdpi.com/1660-3397/6/4/550)
Supplement: s2 [file s2]

<?xml version="1.0" encoding="UTF-8"?>
<kml xmlns="http://earth.google.com/kml/2.1">
<Document>
<Placemark><name>Cochin (Kochi), India</name><description><p>Kumar SS, Philip R, Achuthankutty CT (2006) "Antiviral property of marine actinomycetes against white spot syndrome virus in penaeid shrimps." Current Science 91: 807-811.</p><p><a href="http://www.ias.ac.in/currsci/sep252006/807.pdf">   Click here to open the article's abstract at the publisher's web-site   </a></p></description><Point><altitudeMode>relativeToGround</altitudeMode><coordinates>75.327,9.952,0</coordinates></Point><Style><IconStyle><Icon><href>http://data.aims.gov.au/resources/images/flags/IN-flag.gif</href><w>240</w><h>160</h></Icon></IconStyle></Style><TimeStamp><when>2006</when></TimeStamp></Placemark>
<Placemark><name>Bay of Bengal</name><description><p>Selvin J, Joseph S, Asha KRT, Manjusha WA, Sangeetha VS, Jayaseema DM, Antony MC, Vinitha AJD (2004) "Antibacterial potential of antagonistic Streptomyces sp. isolated from marine sponge; Dendrilla nigra." FEMS Microbiology Ecology 50: 117�122.</p><p><a href="http://www.blackwell-synergy.com/doi/abs/10.1016/j.femsec.2004.06.007">   Click here to open the article's abstract at the publisher's web-site   </a></p></description><Point><altitudeMode>relativeToGround</altitudeMode><coordinates>81.5888191645,14.1977978464,0</coordinates></Point><Style><IconStyle><Icon><href>http://data.aims.gov.au/resources/images/flags/IN-flag.gif</href></Icon></IconStyle></Style><TimeStamp><when>2004</when></TimeStamp></Placemark>
<Placemark><name>Bay of Bengal</name><description><p>Adinarayana G, Venkateshan M, Bapiraju V, Sujatha P, Premkumar J, Ellaiah P, Zeeck A (2006) "Cytotoxic compounds from the marine  actinobacterium Streptomyces corchorusii AUBN1/7-1." Russian Journal of Bioorganic Chemistry 32: 295-300.</p><p><a href="http://dx.doi.org/10.1134/S1068162006030125">   Click here to open the article's abstract at the publisher's web-site   </a></p><p><a href="http://pubchem.ncbi.nlm.nih.gov/summary/summary.cgi?cid=5282060">   Click here to open the natural product's record in Pubchem   </a></p></description><Point><altitudeMode>relativeToGround</altitudeMode><coordinates>85.4148988045,16.209640581,0</coordinates></Point><Style><IconStyle><Icon><href>http://data.aims.gov.au/resources/images/flags/IN-flag.gif</href></Icon></IconStyle></Style><TimeStamp><when>2006</when></TimeStamp></Placemark>
<Placemark><name>Bay of Bengal</name><description><p>Gorajana A, Kurada BVVSN, Peela S, Jangam P, Vinjamuri S, Poluri E, Zeeck A (2005) "1-hydroxy-1-norresistomycin, a new cytotoxic compound from a marine actinomycete, Streptomyces chibaensis AUBN1/7." J. Antibiot. 58: 526-529.</p><p><a href="http://pubchem.ncbi.nlm.nih.gov/summary/summary.cgi?cid=5282060">   Click here to open the natural product's record in Pubchem   </a></p><p><a href="http://www.jstage.jst.go.jp/article/antibiotics/58/8/526/_pdf">   Click here to open the article's abstract at the publisher's web-site   </a></p></description><Point><altitudeMode>relativeToGround</altitudeMode><coordinates>86.0232121506,18.0079700356,0</coordinates></Point><Style><IconStyle><Icon><href>http://data.aims.gov.au/resources/images/flags/IN-flag.gif</href></Icon></IconStyle></Style><TimeStamp><when>2005</when></TimeStamp></Placemark>
<Placemark><name>Bay of Bengal</name><description><p>Saha M, Jr. DG, Ghosh D, Garai D, Jaisankar P, Sarkar KK, Dutta PK, Das S, Jha T, Mukherjee J (2005) "Studies on the production and purification  of an antimicrobial compound and taxonomy of the producer isolated from the marine environment of the sundarbans." Applied Microbiology and Biotechnology 66: 497-505.</p><p><a href="http://dx.doi.org/10.1007/s00253-004-1706-3">   Click here to open the article's abstract at the publisher's web-site   </a></p></description><Point><altitudeMode>relativeToGround</altitudeMode><coordinates>88.7600937596,20.9137355295,0</coordinates></Point><Style><IconStyle><Icon><href>http://data.aims.gov.au/resources/images/flags/IN-flag.gif</href></Icon></IconStyle></Style><TimeStamp><when>2005</when></TimeStamp></Placemark>
<Placemark><name>Bay of Bengal</name><description><p>Saha M, Jaisankar P, Das S, Sarkar KK, Roy S, Besra SE, Vedasiromani JR, Ghosh D, Sana B, Mukherjee J (2006) "Production and purification of a bioactive substance inhibiting multiple drug resistant bacteria and human leukemia cells from a salt-tolerant marine Actinobacterium sp. isolated from the Bay of Bengal." Biotechnology Letters 28: 1083-1088.</p><p><a href="http://dx.doi.org/10.1007/s10529-006-9054-2">   Click here to open the article's abstract at the publisher's web-site   </a></p></description><Point><altitudeMode>relativeToGround</altitudeMode><coordinates>88.7600937596,20.9137355295,0</coordinates></Point><Style><IconStyle><Icon><href>http://data.aims.gov.au/resources/images/flags/IN-flag.gif</href></Icon></IconStyle></Style><TimeStamp><when>2006</when></TimeStamp></Placemark>
<Placemark><name>Eastern Thailand</name><description><p>Isaka M, Suyarnsestakorn C, Tanticharoen M (2002) "Aigialomycins A-E, new resorcylic macrolides from the marine mangrove fungus Aigialus parvus." J. Org. Chem. 67: 1561 -1566.</p><p><a href="http://dx.doi.org/10.1021/jo010930g">   Click here to open the article's abstract at the publisher's web-site   </a></p></description><Point><altitudeMode>relativeToGround</altitudeMode><coordinates>101.811,12.240,0</coordinates></Point><Style><IconStyle><Icon><href>http://data.aims.gov.au/resources/images/flags/TH-flag.gif</href></Icon></IconStyle></Style><TimeStamp><when>2002</when></TimeStamp></Placemark>
<Placemark><name>Sulawesi, Indonesia</name><description><p>Sperry S, Samuels GJ, Crews P (1998) "Vertinoid polyketides from the saltwater culture of the fungus Trichoderma longibrachiatum separated from a Haliclona marine sponge." J. Org. Chem. 63: 10011-10014.</p><p><a href="http://pubchem.ncbi.nlm.nih.gov/summary/summary.cgi?cid=5376187">   Click here to open the natural product's record in Pubchem   </a></p><p><a href="http://dx.doi.org/10.1021/jo9808122">   Click here to open the article's abstract at the publisher's web-site   </a></p></description><Point><altitudeMode>relativeToGround</altitudeMode><coordinates>122.823,-2.479,0</coordinates></Point><Style><IconStyle><Icon><href>http://data.aims.gov.au/resources/images/flags/US-flag.gif</href></Icon></IconStyle></Style><TimeStamp><when>1998</when></TimeStamp></Placemark>
<Placemark><name>Bali Sea, Indonesia</name><description><p>Lin W, Brauers G, Ebel R, Wray V, Sudarsono AB, Proksch P (2003) "Novel chromone derivatives from the fungus Aspergillus versicolor isolated from the marine sponge Xestospongia exigua." J. Nat. Prod. 66: 57-61.</p><p><a href="http://pubchem.ncbi.nlm.nih.gov/summary/summary.cgi?cid=637028">   Click here to open the natural product's record in Pubchem   </a></p><p><a href="http://dx.doi.org/10.1021/np020196b">   Click here to open the article's abstract at the publisher's web-site   </a></p></description><Point><altitudeMode>relativeToGround</altitudeMode><coordinates>115.159,-7.441,0</coordinates></Point><Style><IconStyle><Icon><href>http://data.aims.gov.au/resources/images/flags/DE-flag.gif</href></Icon></IconStyle></Style><TimeStamp><when>2002</when></TimeStamp></Placemark>
<Placemark><name>Menjangan Island, Bali, Indonesia</name><description><p>Smith CJ, Abbanat D, Bernan VS, Maiese WM, Greenstein M, Tahir JJA, Ireland CM (2000) "Novel polyketide metabolites from a species of marine fungi." J. Nat. Prod. 63: 142-145.</p><p><a href="http://pubchem.ncbi.nlm.nih.gov/summary/summary.cgi?cid=6444127">   Click here to open the natural product's record in Pubchem   </a></p><p><a href="http://dx.doi.org/10.1021/np990368d">   Click here to open the article's abstract at the publisher's web-site   </a></p></description><Point><altitudeMode>relativeToGround</altitudeMode><coordinates>114.575,-8.101,0</coordinates></Point><Style><IconStyle><Icon><href>http://data.aims.gov.au/resources/images/flags/US-flag.gif</href></Icon></IconStyle></Style><TimeStamp><when>2003</when></TimeStamp></Placemark>
<Placemark><name>Togian Island, Indonesia</name><description><p>Abrell LM, Borgeson B, Crews P (1996) "A new polyketide, secocurvularin from the salt water culture of a sponge derived fungus." Tetrahedron Letters 37: 8983-8984.</p><p><a href="http://dx.doi.org/10.1016S0040-4039(96)02108-9">   Click here to open the article's abstract at the publisher's web-site   </a></p></description><Point><altitudeMode>relativeToGround</altitudeMode><coordinates>122.286,-0.312,0</coordinates></Point><Style><IconStyle><Icon><href>http://data.aims.gov.au/resources/images/flags/US-flag.gif</href></Icon></IconStyle></Style><TimeStamp><when>2000</when></TimeStamp></Placemark>
<Placemark><name>Ayu Trough</name><description><p>Jeong S-Y, Shin HJ, Kim TS, Lee H-S, Park S-k, Kim HM (2006) "Streptokordin, a new cytotoxic compound of the methylpyridine class from a marine-derived Streptomyces sp. Kordi-3238." J. Antibiot. 59: 234�240.</p><p><a href="http://www.jstage.jst.go.jp/article/antibiotics/59/4/234/_pdf">   Click here to open the article's abstract at the publisher's web-site   </a></p></description><Point><altitudeMode>relativeToGround</altitudeMode><coordinates>134,5,0</coordinates></Point><Style><IconStyle><Icon><href>http://data.aims.gov.au/resources/images/flags/KR-flag.gif</href></Icon></IconStyle></Style><TimeStamp><when>2006</when></TimeStamp></Placemark>
<Placemark><name>Loloata Island, Papua New Guinea</name><description><p>Gerard JM, Haden P, Kelly MT, Andersen RJ (1999) "Loloatins A-D, cyclic decapeptide antibiotics produced in culture by a tropical marine bacterium." J. Nat. Prod. 62: 80-85.</p><p><a href="http://pubchem.ncbi.nlm.nih.gov/summary/summary.cgi?cid=16197712">   Click here to open the natural product's record in Pubchem   </a></p><p><a href="http://dx.doi.org/10.1021/np980219f">   Click here to open the article's abstract at the publisher's web-site   </a></p></description><Point><altitudeMode>relativeToGround</altitudeMode><coordinates>147.285,-9.551,0</coordinates></Point><Style><IconStyle><Icon><href>http://data.aims.gov.au/resources/images/flags/CA-flag.gif</href></Icon></IconStyle></Style><TimeStamp><when>1999</when></TimeStamp></Placemark>
<Placemark><name>Loloata Island, Papua New Guinea</name><description><p>Barsby T. Kelly MT, Gagne SM, Andersen RJ (2001) "Bogorol A produced in culture by a marine Bacillus sp. reveals a novel template for cationic peptide antibiotics." Org Lett. 3: 437-440.</p><p><a href="http://dx.doi.org/10.1021/ol006942q ">   Click here to open the article's abstract at the publisher's web-site   </a></p></description><Point><altitudeMode>relativeToGround</altitudeMode><coordinates>147.285,-9.551,0</coordinates></Point><Style><IconStyle><Icon><href>http://data.aims.gov.au/resources/images/flags/CA-flag.gif</href></Icon></IconStyle></Style><TimeStamp><when>2001</when></TimeStamp></Placemark>
<Placemark><name>Loloata Island, Papua New Guinea</name><description><p>Desjardine K, Pereira A, Wright H, Matainaho, T., Kelly, M., Andersen RJ (2007) "Tauramamide, a lipopeptide antibiotic produced in culture by Brevibacillus laterosporus isolated from a marine habitat: Structure elucidation and synthesis." J Nat Prod. 70: 1850-1853.</p><p><a href="http://dx.doi.org/10.1021/np070209r">   Click here to open the article's abstract at the publisher's web-site   </a></p></description><Point><altitudeMode>relativeToGround</altitudeMode><coordinates>147.285,-9.551,0</coordinates></Point><Style><IconStyle><Icon><href>http://data.aims.gov.au/resources/images/flags/CA-flag.gif</href></Icon></IconStyle></Style><TimeStamp><when>2007</when></TimeStamp></Placemark>
<Placemark><name>Madang, Papua New Guinea</name><description><p>Garo E, Starks CM, Jensen PR, Fenical W, Lobkovsky E, Clardy J (2003) "Trichodermamides A and B, cytotoxic modified dipeptides from the marine-derived fungus Trichoderma virens." J. Nat. Prod. 66: 423-426.</p><p><a href="http://pubchem.ncbi.nlm.nih.gov/summary/summary.cgi?cid=639644">   Click here to open the natural product's record in Pubchem   </a></p><p><a href="http://dx.doi.org/10.1021/np0204390">   Click here to open the article's abstract at the publisher's web-site   </a></p></description><Point><altitudeMode>relativeToGround</altitudeMode><coordinates>146.213,-5.185,0</coordinates></Point><Style><IconStyle><Icon><href>http://data.aims.gov.au/resources/images/flags/US-flag.gif</href></Icon></IconStyle></Style><TimeStamp><when>2003</when></TimeStamp></Placemark>
<Placemark><name>Madang, Papua New Guinea</name><description><p>Magarvey NA, Keller JM, Bernan V, Dworkin M, Sherman DH (2004) "Isolation and characterization of novel marine-derived actinomycete taxa rich in bioactive metabolites." Applied and Environmental Microbiology 70: 7520�7529.</p><p><a href="http://dx.doi.org/10.1128/AEM.70.12.7520-7529.2004">   Click here to open the article's abstract at the publisher's web-site   </a></p></description><Point><altitudeMode>relativeToGround</altitudeMode><coordinates>146.213,-5.185,0</coordinates></Point><Style><IconStyle><Icon><href>http://data.aims.gov.au/resources/images/flags/US-flag.gif</href></Icon></IconStyle></Style><TimeStamp><when>2004</when></TimeStamp></Placemark>
<Placemark><name>Fiji Islands</name><description><p>Abrell LM, Cheng X-C, Crews P (1994) "New nectriapyrones by salt water culture of a fungus separated from an Indo-Pacific sponge." Tetrahedron Letters 35: 9159-9160.</p><p><a href="http://pubchem.ncbi.nlm.nih.gov/summary/summary.cgi?cid=5358550">   Click here to open the natural product's record in Pubchem   </a></p><p><a href="http://dx.doi.org/10.1016/0040-4039(94)88453-6 ">   Click here to open the article's abstract at the publisher's web-site   </a></p></description><Point><altitudeMode>relativeToGround</altitudeMode><coordinates>179.555125271,-17.6245385738,0</coordinates></Point><Style><IconStyle><Icon><href>http://data.aims.gov.au/resources/images/flags/US-flag.gif</href></Icon></IconStyle></Style><TimeStamp><when>1994</when></TimeStamp></Placemark>
<Placemark><name>North eastern Australia</name><description><p>Guella G, Pietra F, Dini F (2004) "Rarisetenolide, epoxyrarisetenolide, and epirarisetenolide, new-skeleton sesquiterpene lactones as taxonomic markers and defensive agents of the marine ciliated morphospecies, Euplotes rariseta." Helvetica Chimica Acta 79: 2180 � 2189.</p><p><a href="http://dx.doi.org/10.1002/hlca.19960790813">   Click here to open the article's abstract at the publisher's web-site   </a></p></description><Point><altitudeMode>relativeToGround</altitudeMode><coordinates>148.067793265,-16.1758740067,0</coordinates></Point><Style><IconStyle><Icon><href>http://data.aims.gov.au/resources/images/flags/IT-flag.gif</href></Icon></IconStyle></Style><TimeStamp><when>2004</when></TimeStamp></Placemark>
<Placemark><name>New Zealand</name><description><p>Guella G, Pietra F, Dini F (2004) "Rarisetenolide, epoxyrarisetenolide, and epirarisetenolide, new-skeleton sesquiterpene lactones as taxonomic markers and defensive agents of the marine ciliated morphospecies, Euplotes rariseta." Helvetica Chimica Acta 79: 2180 � 2189.</p><p><a href="http://dx.doi.org/10.1128/AEM.70.12.7520-7529.2004">   Click here to open the article's abstract at the publisher's web-site   </a></p></description><Point><altitudeMode>relativeToGround</altitudeMode><coordinates>172.652653051,-34.7063440074,0</coordinates></Point><Style><IconStyle><Icon><href>http://data.aims.gov.au/resources/images/flags/IT-flag.gif</href></Icon></IconStyle></Style><TimeStamp><when>2004</when></TimeStamp></Placemark>
<Placemark><name>Brazilian coast</name><description><p>Guella G, Pietra F, Dini F (2004) "Rarisetenolide, epoxyrarisetenolide, and epirarisetenolide, new-skeleton sesquiterpene lactones as taxonomic markers and defensive agents of the marine ciliated morphospecies, Euplotes rariseta." Helvetica Chimica Acta 79: 2180 � 2189.</p><p><a href="http://dx.doi.org/10.1128/AEM.70.12.7520-7529.2004">   Click here to open the article's abstract at the publisher's web-site   </a></p></description><Point><altitudeMode>relativeToGround</altitudeMode><coordinates>-46.5,-25,0</coordinates></Point><Style><IconStyle><Icon><href>http://data.aims.gov.au/resources/images/flags/IT-flag.gif</href></Icon></IconStyle></Style><TimeStamp><when>2004</when></TimeStamp></Placemark>
<Placemark><name>Gambier Islands,French Polynesia</name><description><p>Nagai H, Murata M, Torigoe K, Satake M, Yasumoto T (1992) "Gambieric acids, new potent antifungal substances with unprecedented polyether structures from a marine dinoflagellate Gambierdiscus toxicus." J. Org. Chem. 57: 5448-5453.</p><p><a href="http://pubchem.ncbi.nlm.nih.gov/summary/summary.cgi?cid=6436300">   Click here to open the natural product's record in Pubchem   </a></p><p><a href="http://pubs.acs.org/cgi-bin/archive.cgi/joceah/1992/57/i20/pdf/jo00046a029.pdf">   Click here to open the article's abstract at the publisher's web-site   </a></p></description><Point><altitudeMode>relativeToGround</altitudeMode><coordinates>-134.967,-23.15,0</coordinates></Point><Style><IconStyle><Icon><href>http://data.aims.gov.au/resources/images/flags/JP-flag.gif</href></Icon></IconStyle></Style><TimeStamp><when>1992</when></TimeStamp></Placemark>
<Placemark><name>Gambier Islands,French Polynesia</name><description><p>Zheng W, DeMattei JA, Wu J-P, Duan JJ-W, Cook LR, Oinuma H, Kishi Y (1996) "Complete relative stereochemistry of maitotoxin." J. Am. Chem. Soc. 118: 7946-7968.</p><p><a href="http://dx.doi.org/10.1021/ja961230+ S0002-7863(96)01230-9">   Click here to open the article's abstract at the publisher's web-site   </a></p></description><Point><altitudeMode>relativeToGround</altitudeMode><coordinates>-134.967,-23.15,0</coordinates></Point><Style><IconStyle><Icon><href>http://data.aims.gov.au/resources/images/flags/US-flag.gif</href></Icon></IconStyle></Style><TimeStamp><when>1996</when></TimeStamp></Placemark>
<Placemark><name>Xiamen Island, China</name><description><p>Zheng Z, Zeng W, Huang Y, Yanga Z, Li J, Cai H, Su W (2000) "Detection of antitumor and antimicrobial activities in marine organism associated actinomycetes isolated from the Taiwan Strait, China." FEMS Microbiology Letters 188: 87-91.</p><p><a href="http://dx.doi.org/10.1016/S0378-1097(00)00215-9">   Click here to open the article's abstract at the publisher's web-site   </a></p></description><Point><altitudeMode>relativeToGround</altitudeMode><coordinates>118.052,24.444,0</coordinates></Point><Style><IconStyle><Icon><href>http://data.aims.gov.au/resources/images/flags/CH-flag.gif</href></Icon></IconStyle></Style><TimeStamp><when>2000</when></TimeStamp></Placemark>
<Placemark><name>Yap Island, Micronesia</name><description><p>Namikoshi M, Kobayashi H, Yoshimoto T, Meguro S (2000) "Paecilospirone, a unique spiro[chroman-2,1(3H)-isobenzofuran] derivative isolated from tropical marine fungus Paecilomyces sp." Chemistry Letters 29: 308.</p><p><a href="http://www.jstage.jst.go.jp/article/cl/29/4/29_308/_article/-char/en">   Click here to open the article's abstract at the publisher's web-site   </a></p></description><Point><altitudeMode>relativeToGround</altitudeMode><coordinates>138.125,9.53735,0</coordinates></Point><Style><IconStyle><Icon><href>http://data.aims.gov.au/resources/images/flags/JP-flag.gif</href></Icon></IconStyle></Style><TimeStamp><when>2000</when></TimeStamp></Placemark>
<Placemark><name>Yap Island, Micronesia</name><description><p>Nakahara T, Yokochi T, Higashihara T, Tanaka S, Yaguchi T, Honda D (1996) "Production of docosahexaenoic and docosapentaenoic acids by Schizochytrium sp isolated from Yap Islands." J. Am. Oil Chem. Soc. 73: 1421-1426.</p><p><a href="http://dx.doi.org/10.1007/s00253-006-0376-8">   Click here to open the article's abstract at the publisher's web-site   </a></p></description><Point><altitudeMode>relativeToGround</altitudeMode><coordinates>138.05,9.51,0</coordinates></Point><Style><IconStyle><Icon><href>http://data.aims.gov.au/resources/images/flags/JP-flag.gif</href></Icon></IconStyle></Style><TimeStamp><when>1996</when></TimeStamp></Placemark>
<Placemark><name>Okinawa, Japan</name><description><p>Shigemori H, Tenma M, Shimazaki K, Kobayashi Ji (1998) "Three new metabolites from the marine yeast Aureobasidium pullulans." J. Nat. Prod. 61: 696-698.</p><p><a href="http://dx.doi.org/10.1021/np980011u">   Click here to open the article's abstract at the publisher's web-site   </a></p></description><Point><altitudeMode>relativeToGround</altitudeMode><coordinates>127.398,26.094,0</coordinates></Point><Style><IconStyle><Icon><href>http://data.aims.gov.au/resources/images/flags/JP-flag.gif</href></Icon></IconStyle></Style><TimeStamp><when>1998</when></TimeStamp></Placemark>
<Placemark><name>Okinawa, Japan</name><description><p>Kubota T, Tsuda M, Takahashi M, Ishibashi M, Naoki H, Kobayashi J (1999) "Colopsinols B and C, new long chain polyhydroxy compounds from cultured marine dinoflagellate Amphidinium sp." J. Chem. Soc., Perkin Trans. 1: 3483 � 3487.</p><p><a href="http://dx.doi.org/10.1039/a906296c">   Click here to open the article's abstract at the publisher's web-site   </a></p></description><Point><altitudeMode>relativeToGround</altitudeMode><coordinates>127.498,26.194,0</coordinates></Point><Style><IconStyle><Icon><href>http://data.aims.gov.au/resources/images/flags/JP-flag.gif</href></Icon></IconStyle></Style><TimeStamp><when>1999</when></TimeStamp></Placemark>
<Placemark><name>Seragaki Beach, Okinawa Island, Japan</name><description><p>Komatsu K, Shigemori H, Mikami Y, Kobayashi Ji (2000) "Sculezonones A and B, two metabolites possessing a phenalenone skeleton from a marine-derived fungus Penicillium species." J. Nat. Prod. 63: 408-409.</p><p><a href="http://dx.doi.org/10.1021/np990452t">   Click here to open the article's abstract at the publisher's web-site   </a></p></description><Point><altitudeMode>relativeToGround</altitudeMode><coordinates>127.877,26.511,0</coordinates></Point><Style><IconStyle><Icon><href>http://data.aims.gov.au/resources/images/flags/JP-flag.gif</href></Icon></IconStyle></Style><TimeStamp><when>2000</when></TimeStamp></Placemark>
<Placemark><name>Cape Ma'eda, Okinawa, Japan</name><description><p>Kobayashi J, Kubota T (2007) "Bioactive macrolides and polyketides from marine dinoflagellates of the genus Amphidinium." J. Nat. Prod. 70: 451 -460.</p><p><a href="http://dx.doi.org/10.1021/np0605844">   Click here to open the article's abstract at the publisher's web-site   </a></p></description><Point><altitudeMode>relativeToGround</altitudeMode><coordinates>127.890,26.511,0</coordinates></Point><Style><IconStyle><Icon><href>http://data.aims.gov.au/resources/images/flags/JP-flag.gif</href></Icon></IconStyle></Style><TimeStamp><when>2007</when></TimeStamp></Placemark>
<Placemark><name>Cape Zanpa, Okinawa, Japan</name><description><p>Kobayashi J, Kubota T (2007) "Bioactive macrolides and polyketides from marine dinoflagellates of the genus Amphidinium." J. Nat. Prod. 70: 451 -460.</p><p><a href="http://dx.doi.org/10.1021/np0605844">   Click here to open the article's abstract at the publisher's web-site   </a></p></description><Point><altitudeMode>relativeToGround</altitudeMode><coordinates>127.705,26.443,0</coordinates></Point><Style><IconStyle><Icon><href>http://data.aims.gov.au/resources/images/flags/JP-flag.gif</href></Icon></IconStyle></Style><TimeStamp><when>2007</when></TimeStamp></Placemark>
<Placemark><name>Sunabe, Okinawa, Japan</name><description><p>Kobayashi J, Kubota T (2007) "Bioactive macrolides and polyketides from marine dinoflagellates of the genus Amphidinium." J. Nat. Prod. 70: 451 -460.</p><p><a href="http://dx.doi.org/10.1021/np0605844">   Click here to open the article's abstract at the publisher's web-site   </a></p></description><Point><altitudeMode>relativeToGround</altitudeMode><coordinates>127.75,26.31667,0</coordinates></Point><Style><IconStyle><Icon><href>http://data.aims.gov.au/resources/images/flags/JP-flag.gif</href></Icon></IconStyle></Style><TimeStamp><when>2007</when></TimeStamp></Placemark>
<Placemark><name>Tahiti, French Polynesia</name><description><p>Murata M, Legrand AM, Ishibashi Y, Fukui M, Yasumoto T (1990) "Structures and configurations of ciguatoxin from the moray eel Gymnothorax javanicus and its likely precursor from the dinoflagellate Gambierdiscus toxicus." J. Am. Chem Soc 112: 4380-4386.</p><p><a href="http://pubchem.ncbi.nlm.nih.gov/summary/summary.cgi?cid=5311333">   Click here to open the natural product's record in Pubchem   </a></p><p><a href="http://pubs.acs.org/cgi-bin/archive.cgi/jacsat/1990/112/i11/pdf/ja00167a040.pdf">   Click here to open the article's abstract at the publisher's web-site   </a></p></description><Point><altitudeMode>relativeToGround</altitudeMode><coordinates>-149.091651617,-17.5812999521,0</coordinates></Point><Style><IconStyle><Icon><href>http://data.aims.gov.au/resources/images/flags/JP-flag.gif</href></Icon></IconStyle></Style><TimeStamp><when>1990</when></TimeStamp></Placemark>
<Placemark><name>Komodo Island, Indonesia</name><description><p>Itoh T, Kinoshita M, Aoki S, Kobayashi M (2003) "Komodoquinone A, a novel neuritogenic anthracycline, from marine Streptomyces sp. Ks3." J. Nat. Prod. 66: 1373-1377.</p><p><a href="http://dx.doi.org/10.1021/np030212k">   Click here to open the article's abstract at the publisher's web-site   </a></p></description><Point><altitudeMode>relativeToGround</altitudeMode><coordinates>119.45,-8.55,0</coordinates></Point><Style><IconStyle><Icon><href>http://data.aims.gov.au/resources/images/flags/JP-flag.gif</href></Icon></IconStyle></Style><TimeStamp><when>2003</when></TimeStamp></Placemark>
<Placemark><name>Joseph Bonaparte Gulf, Australia</name><description><p>Motti C, Bourne DG, Burnell JN, Doyle JR, Haines DS, Liptrot CH, Llewellyn LE, Ludke S, Muirhead A, Tapiolas DM (2007) "Screening marine fungi for inhibitors of the C4 plant enzyme pyruvate phosphate dikinase: Unguinol as a potential novel herbicide candidate." Appl Environ Microbiol. 73: 1921-7.</p><p><a href="http://dx.doi.org/10.1128/AEM.02479-06">   Click here to open the article's abstract at the publisher's web-site   </a></p></description><Point><altitudeMode>relativeToGround</altitudeMode><coordinates>128.659,-14.1947,0</coordinates></Point><Style><IconStyle><Icon><href>http://data.aims.gov.au/resources/images/flags/AU-flag.gif</href></Icon></IconStyle></Style><TimeStamp><when>2003</when></TimeStamp></Placemark>
<Placemark><name>Palau</name><description><p>Namikoshi M, Akano K, Meguro S, Kasuga I, Mine Y, Takahashi T, Kobayashi H (2001) "A new macrocyclic trichothecene, 12,13-deoxyroridin E, produced by the marine-derived fungus Myrothecium roridum collected in Palau." J. Nat. Prod. 64: 396-398.</p><p><a href="http://pubchem.ncbi.nlm.nih.gov/summary/summary.cgi?cid=11968047">   Roridin E Click here to open the natural product's record in Pubchem   </a></p><p><a href="http://dx.doi.org/10.1021/np000443g">   Click here to open the article's abstract at the publisher's web-site   </a></p></description><Point><altitudeMode>relativeToGround</altitudeMode><coordinates>134.405,7.381,0</coordinates></Point><Style><IconStyle><Icon><href>http://data.aims.gov.au/resources/images/flags/JP-flag.gif</href></Icon></IconStyle></Style><TimeStamp><when>2001</when></TimeStamp></Placemark>
<Placemark><name>Mochima Bay, Venezuela</name><description><p>Malmstr�m J, Christophersen C, Barrero AF, Oltra JE, Justicia J, Rosales A (2002) "Bioactive metabolites from a marine-derived strain of the fungus Emericella variecolor." J. Nat. Prod. 65: 364-367.</p><p><a href="http://pubchem.ncbi.nlm.nih.gov/summary/summary.cgi?cid=636888">   Click here to open the natural product's record in Pubchem   </a></p><p><a href="http://dx.doi.org/10.1021/np0103214">   Click here to open the article's abstract at the publisher's web-site   </a></p></description><Point><altitudeMode>relativeToGround</altitudeMode><coordinates>-64.5,10.5,0</coordinates></Point><Style><IconStyle><Icon><href>http://data.aims.gov.au/resources/images/flags/SP-flag.gif</href></Icon></IconStyle></Style><TimeStamp><when>2002</when></TimeStamp></Placemark>
<Placemark><name>La Jolla Coast, USA</name><description><p>Kwon HC, Kauffman CA, Jensen PR, Fenical W (2006) "Marinomycins A-D, antitumor-antibiotics of a new structure class from a marine actinomycete of the recently discovered genus �Marinispora�." J. Am. Chem. Soc. 128: 1622-1632.</p><p><a href="http://dx.doi.org/10.1021/ja0558948">   Click here to open the article's abstract at the publisher's web-site   </a></p></description><Point><altitudeMode>relativeToGround</altitudeMode><coordinates>-117.360556549,32.8093895519,0</coordinates></Point><Style><IconStyle><Icon><href>http://data.aims.gov.au/resources/images/flags/US-flag.gif</href></Icon></IconStyle></Style><TimeStamp><when>2006</when></TimeStamp></Placemark>
<Placemark><name>Middle Pacific MP station, West Pacific</name><description><p>Xu Y, Miao L, Li X-C, Xiao X, Qian P-Y (2007) "Antibacterial and antilarval activity of deep-sea bacteria from sediments of the West Pacific Ocean." Biofouling 23: 131 - 137.</p><p><a href="http://dx.doi.org/10.1080/08927010701219323" >   Click here to open the article's abstract at the publisher's web-site   </a></p></description><Point><altitudeMode>relativeToGround</altitudeMode><coordinates>-177.705,10.585,0</coordinates></Point><Style><IconStyle><Icon><href>http://data.aims.gov.au/resources/images/flags/CH-flag.gif</href></Icon></IconStyle></Style><TimeStamp><when>2007</when></TimeStamp></Placemark>
<Placemark><name>Pacific nodule province A station 3, West Pacific</name><description><p>Xu Y, Miao L, Li X-C, Xiao X, Qian P-Y (2007) "Antibacterial and antilarval activity of deep-sea bacteria from sediments of the West Pacific Ocean." Biofouling 23: 131 - 137</p><p><a href="http://dx.doi.org/10.1080/08927010701219323" >   Click here to open the article's abstract at the publisher's web-site   </a></p></description><Point><altitudeMode>relativeToGround</altitudeMode><coordinates>-153.872,7.229,0</coordinates></Point><Style><IconStyle><Icon><href>http://data.aims.gov.au/resources/images/flags/CH-flag.gif</href></Icon></IconStyle></Style><TimeStamp><when>2007</when></TimeStamp></Placemark>
<Placemark><name>La Jolla coast, USA</name><description><p>Soria-Mercado IE, Prieto-Davo A, Jensen PR, Fenical W (2005) "Antibiotic terpenoid chloro-dihydroquinones from a new marine actinomycete." J. Nat. Prod. 68: 904-910.</p><p><a href="http://dx.doi.org/10.1021/np058011z">   Click here to open the article's abstract at the publisher's web-site   </a></p></description><Point><altitudeMode>relativeToGround</altitudeMode><coordinates>-117.293,32.868,0</coordinates></Point><Style><IconStyle><Icon><href>http://data.aims.gov.au/resources/images/flags/US-flag.gif</href></Icon></IconStyle></Style><TimeStamp><when>2005</when></TimeStamp></Placemark>
<Placemark><name>Florida Keys</name><description><p>Moore BS, Trischman JA, Seng D, Kho D, Jensen PR, Fenical W (1999) "Salinamides, antiinflammatory depsipeptides from a marine streptomycete." J. Org. Chem. 64: 1145-1150.</p><p><a href="http://dx.doi.org/10.1021/jo9814391">   Click here to open the article's abstract at the publisher's web-site   </a></p></description><Point><altitudeMode>relativeToGround</altitudeMode><coordinates>-81.488,24.630,0</coordinates></Point><Style><IconStyle><Icon><href>http://data.aims.gov.au/resources/images/flags/US-flag.gif</href></Icon></IconStyle></Style><TimeStamp><when>1999</when></TimeStamp></Placemark>
<Placemark><name>Exuma Islands, Bahamas</name><description><p>Jenkins KM, Renner MK, Jensen PR, Fenical W (1998) "Exumolides A and B: Antimicroalgal cyclic depsipeptides produced by a marine fungus of the genus Scytalidium." Tetrahedron Letters 39: 2463-2466.</p><p><a href="http://dx.doi.org/10.1016/S0040-4039(98)00288-3">   Click here to open the article's abstract at the publisher's web-site   </a></p></description><Point><altitudeMode>relativeToGround</altitudeMode><coordinates>-75.843,23.568,0</coordinates></Point><Style><IconStyle><Icon><href>http://data.aims.gov.au/resources/images/flags/US-flag.gif</href></Icon></IconStyle></Style><TimeStamp><when>1998</when></TimeStamp></Placemark>
<Placemark><name>Chub Cay, Bahamas</name><description><p>Feling RH, Buchanan GO, Mincer TJ, Kauffman CA, Jensen PR, Fenical W (2003) "Salinosporamide A: A highly cytotoxic proteasome inhibitor from a novel microbial source, a marine bacterium of the new genus Salinospora." Angew. Chem. Int. Ed. 42: 355-357.</p><p><a href="http://dx.doi.org/10.1002/anie.200390115">   Click here to open the article's abstract at the publisher's web-site   </a></p></description><Point><altitudeMode>relativeToGround</altitudeMode><coordinates>-77.883,25.408,0</coordinates></Point><Style><IconStyle><Icon><href>http://data.aims.gov.au/resources/images/flags/US-flag.gif</href></Icon></IconStyle></Style><TimeStamp><when>2003</when></TimeStamp></Placemark>
<Placemark><name>Bahamas</name><description><p>Cueto M, Jensen P, Fenical W (2000) "N-methylsansalvamide, a cytotoxic cyclic depsipeptide from a marine fungus of the genus Fusarium." Phytochemistry 55: 223-6.</p><p><a href="http://dx.doi.org/10.1021/np0102713">   Click here to open the article's abstract at the publisher's web-site   </a></p></description><Point><altitudeMode>relativeToGround</altitudeMode><coordinates>-78.6339469448,23.6599089287,0</coordinates></Point><Style><IconStyle><Icon><href>http://data.aims.gov.au/resources/images/flags/US-flag.gif</href></Icon></IconStyle></Style><TimeStamp><when>2001</when></TimeStamp></Placemark>
<Placemark><name>Little San Salvador, Bahamas</name><description><p>Rahb�k L, Christophersen C, Frisvad J, Bengaard HS, Larsen S, Rassingj BR (1997) "Insulicolide A: A new nitrobenzoyloxy-substituted sesquiterpene from the marine fungus Aspergillus insulicola." J. Nat. Prod. 60: 811-813.</p><p><a href="http://dx.doi.org/10.1021/np970142f">   Click here to open the article's abstract at the publisher's web-site   </a></p></description><Point><altitudeMode>relativeToGround</altitudeMode><coordinates>-75.92,24.580,0</coordinates></Point><Style><IconStyle><Icon><href>http://data.aims.gov.au/resources/images/flags/DK-flag.gif</href></Icon></IconStyle></Style><TimeStamp><when>1997</when></TimeStamp></Placemark>
<Placemark><name>Sweetings Cay, Bahamas</name><description><p>Renner MK, Jensen PR, Fenical W (2000) "Mangicols: Structures and biosynthesis of a new class of sesterterpene polyols from a marine fungus of the genus Fusarium." J. Org. Chem. 65: 4843-4852.</p><p><a href="http://dx.doi.org/10.1021/jo000081h">   Click here to open the article's abstract at the publisher's web-site   </a></p></description><Point><altitudeMode>relativeToGround</altitudeMode><coordinates>-77.88,26.6,0</coordinates></Point><Style><IconStyle><Icon><href>http://data.aims.gov.au/resources/images/flags/US-flag.gif</href></Icon></IconStyle></Style><TimeStamp><when>2000</when></TimeStamp></Placemark>
<Placemark><name>Sweetings Cay, Bahamas</name><description><p>Renner MK, Jensen PR, Fenical W (1998) "Neomangicols: Structures and absolute stereochemistries of unprecedented halogenated sesterterpenes from a marine fungus of the genus Fusarium." J. Org. Chem. 63: 8346 � 8354</p><p><a href="http://dx.doi.org/10.1021/jo981226b">   Click here to open the article's abstract at the publisher's web-site   </a></p></description><Point><altitudeMode>relativeToGround</altitudeMode><coordinates>-77.88,26.6,0</coordinates></Point><Style><IconStyle><Icon><href>http://data.aims.gov.au/resources/images/flags/US-flag.gif</href></Icon></IconStyle></Style><TimeStamp><when>1998</when></TimeStamp></Placemark>
<Placemark><name>Bovoni Cay, US Virgin Islands</name><description><p>Cueto M, Jensen P, Fenical W (2000) "N-methylsansalvamide, a cytotoxic cyclic depsipeptide from a marine fungus of the genus Fusarium." Phytochemistry 55: 223-6.</p><p><a href="http://pubchem.ncbi.nlm.nih.gov/summary/summary.cgi?cid=637870">   Click here to open the natural product's record in Pubchem   </a></p><p><a href="http://dx.doi.org/10.1016/S0031-9422(00)00280-6">   Click here to open the article's abstract at the publisher's web-site   </a></p></description><Point><altitudeMode>relativeToGround</altitudeMode><coordinates>-64.872147,18.314153,0</coordinates></Point><Style><IconStyle><Icon><href>http://data.aims.gov.au/resources/images/flags/US-flag.gif</href></Icon></IconStyle></Style><TimeStamp><when>2000</when></TimeStamp></Placemark>
<Placemark><name>Sweetings Cay, Bahamas</name><description><p>Belofsky GN, Anguera M, Jensen PR, Fenical W, K�ck M (2000) "Oxepinamides A-C and fumiquinazolines H-I: Bioactive metabolites from a marine isolate of a fungus of the genus Acremonium." Chem. Eur. J. 6: 1355-1360.</p><p><a href="http://www3.interscience.wiley.com/cgi-bin/abstract/71008768/ABSTRACT">   Click here to open the article's abstract at the publisher's web-site   </a></p></description><Point><altitudeMode>relativeToGround</altitudeMode><coordinates>-77.88,26.6,0</coordinates></Point><Style><IconStyle><Icon><href>http://data.aims.gov.au/resources/images/flags/US-flag.gif</href></Icon></IconStyle></Style><TimeStamp><when>2000</when></TimeStamp></Placemark>
<Placemark><name>Eleuthera Point, Bahamas</name><description><p>Belofsky GN, Jensen PR, Renner MK, Fenical W (1998). "New cytotoxic sesquiterpenoid nitrobenzoyl esters from a marine isolate of the fungus Aspergillus versicolor." Tetrahedron 54: 1715-1724.</p><p><a href="http://pubchem.ncbi.nlm.nih.gov/summary/summary.cgi?cid=13281">   Click here to open the natural product's record in Pubchem   </a></p><p><a href="http://dx.doi.org/10.1016/S0040-4020(97)10396-9">   Click here to open the article's abstract at the publisher's web-site   </a></p></description><Point><altitudeMode>relativeToGround</altitudeMode><coordinates>-76.134,24.609,0</coordinates></Point><Style><IconStyle><Icon><href>http://data.aims.gov.au/resources/images/flags/US-flag.gif</href></Icon></IconStyle></Style><TimeStamp><when>1998</when></TimeStamp></Placemark>
<Placemark><name>Dry Tortugas National Park, Florida, USA</name><description><p>Varoglu M, Crews P (2000) "Biosynthetically diverse compounds from a saltwater culture of sponge-derived Aspergillus niger." J. Nat. Prod. 63: 41-43.</p><p><a href="http://pubchem.ncbi.nlm.nih.gov/summary/summary.cgi?cid=198385">  Click here to open Pubchem record for malformin  </a></p><p><a href="http://pubchem.ncbi.nlm.nih.gov/summary/summary.cgi?cid=370342">   Click here to open Pubchem record for pyrophen  </a></p><p><a href="http://dx.doi.org/10.1021/np9902892">   Click here to open the article's abstract at the publisher's web-site   </a></p></description><Point><altitudeMode>relativeToGround</altitudeMode><coordinates>-82.9226,24.6289,0</coordinates></Point><Style><IconStyle><Icon><href>http://data.aims.gov.au/resources/images/flags/US-flag.gif</href></Icon></IconStyle></Style><TimeStamp><when>2000</when></TimeStamp></Placemark>
<Placemark><name>Dry Tortugas National Park, Florida, USA</name><description><p>Varoglu M, Corbett TH, Valeriote FA, Crews P (1997) "Asperazine, a selective cytotoxic alkaloid from a sponge-derived culture of Aspergillus niger." J. Org. Chem. 62: 7078-7079.</p><p><a href="http://dx.doi.org/10.1021/jo970568z">   Click here to open the article's abstract at the publisher's web-site   </a></p></description><Point><altitudeMode>relativeToGround</altitudeMode><coordinates>-82.9226,24.6289,0</coordinates></Point><Style><IconStyle><Icon><href>http://data.aims.gov.au/resources/images/flags/US-flag.gif</href></Icon></IconStyle></Style><TimeStamp><when>1997</when></TimeStamp></Placemark>
<Placemark><name>Hector Bay, Jamaica</name><description><p>Edwards DJ, Marquez BL, Nogle LM, McPhail K, Goeger DE, Roberts MA, Gerwick WH (2004) "Structure and biosynthesis of the jamaicamides, new mixed polyketide-peptide neurotoxins from the marine cyanobacterium Lyngbya majuscule." Chemistry and Biology 11: 817-833.</p><p><a href="http://dx.doi.org/10.1016/j.chembiol.2004.03.030">   Click here to open the article's abstract at the publisher's web-site   </a></p></description><Point><altitudeMode>relativeToGround</altitudeMode><coordinates>-76.250,18,0</coordinates></Point><Style><IconStyle><Icon><href>http://data.aims.gov.au/resources/images/flags/US-flag.gif</href></Icon></IconStyle></Style><TimeStamp><when>2004</when></TimeStamp></Placemark>
<Placemark><name>Casablanca, Morocco</name><description><p>Guella G, Dini F, Erra F, Pietra F (1994) "Raikovenal, a new sesquiterpenoid favouring adaptive radiation of the marine ciliate Euplotes raikovi, and its putative biogenetic precursor, preraikovenal." J. Chem. Soc., Chem. Commun. 1994: 2585 � 2586.</p><p><a href="http://dx.doi.org/10.1039/C39940002585">   Click here to open the article's abstract at the publisher's web-site   </a></p></description><Point><altitudeMode>relativeToGround</altitudeMode><coordinates>-9.15,33.74,0</coordinates></Point><Style><IconStyle><Icon><href>http://data.aims.gov.au/resources/images/flags/IT-flag.gif</href></Icon></IconStyle></Style><TimeStamp><when>1994</when></TimeStamp></Placemark>
<Placemark><name>Dominica</name><description><p>H�ller U, Konig GM, Wright AD (1999) "Three new metabolites from marine-derived fungi of the genera Coniothyrium and Microsphaeropsis." J. Nat. Prod. 62: 114-118.</p><p><a href="http://dx.doi.org/10.1021/np980341e">   Click here to open the article's abstract at the publisher's web-site   </a></p></description><Point><altitudeMode>relativeToGround</altitudeMode><coordinates>-61.16,15.4,0</coordinates></Point><Style><IconStyle><Icon><href>http://data.aims.gov.au/resources/images/flags/DE-flag.gif</href></Icon></IconStyle></Style><TimeStamp><when>1999</when></TimeStamp></Placemark>
<Placemark><name>Dominica</name><description><p>H�ller U, K�nig GM, Wright AD (1999) "A new tyrosine kinase inhibitor from a marine isolate of Ulocladium botrytis and new metabolites from the marine fungi Asteromyces cruciatus and Varicosporina ramulosa." Eur. J. Org. Chem. 1999: 2949 � 2955.</p><p><a href="http://www3.interscience.wiley.com/cgi-bin/abstract/66502021/ABSTRACT">   Click here to open the article's abstract at the publisher's web-site   </a></p></description><Point><altitudeMode>relativeToGround</altitudeMode><coordinates>-61.16,15.4,0</coordinates></Point><Style><IconStyle><Icon><href>http://data.aims.gov.au/resources/images/flags/DE-flag.gif</href></Icon></IconStyle></Style><TimeStamp><when>1999</when></TimeStamp></Placemark>
<Placemark><name>Tanikely Island, Madagascar</name><description><p>Singh IP, Milligan KE, Gerwick WH (1999) "Tanikolide, a toxic and antifungal lactone from the marine cyanobacterium Lyngbya majuscule." J. Nat. Prod. 62: 1333-1335.</p><p><a href="http://pubchem.ncbi.nlm.nih.gov/summary/summary.cgi?cid=5276592">   Click here to open the natural product's record in Pubchem   </a></p><p><a href="http://dx.doi.org/10.1021/np990162c">   Click here to open the article's abstract at the publisher's web-site   </a></p></description><Point><altitudeMode>relativeToGround</altitudeMode><coordinates>48.232,-13.483,0</coordinates></Point><Style><IconStyle><Icon><href>http://data.aims.gov.au/resources/images/flags/US-flag.gif</href></Icon></IconStyle></Style><TimeStamp><when>1999</when></TimeStamp></Placemark>
<Placemark><name>Gulf of Sanya, Hainan Island, China</name><description><p>Wu J, Long L, Song Y, Zhang S, Li Q, Huang J, Xiao Z (2005) "A new unsaturated glycoglycerolipid from a cultured marine dinoflagellate Amphidinium carterae." Chem. Pharm. Bull. 53: 330-332.</p><p><a href="http://www.jstage.jst.go.jp/article/cpb/53/3/330/_pdf">   Click here to open the article's abstract at the publisher's web-site   </a></p></description><Point><altitudeMode>relativeToGround</altitudeMode><coordinates>109.382,18..235,0</coordinates></Point><Style><IconStyle><Icon><href>http://data.aims.gov.au/resources/images/flags/CH-flag.gif</href></Icon></IconStyle></Style><TimeStamp><when>2005</when></TimeStamp></Placemark>
<Placemark><name>South China Sea</name><description><p>Lin Y, Shao Z, Jiang G, Zhou S, Cai J, Vrijmoed LLP, Gareth Jones EB (2000) "Penicillazine, a unique quinolone derivative with 4H-5,6-dihydro-1,2-oxazine ring system from the marine fungus Penicillium sp. (strain #386) from the South China Sea." Tetrahedron 56: 9607-9609.</p><p><a href="http://dx.doi.org/10.1016/S0040-4020(00)00917-0">   Click here to open the article's abstract at the publisher's web-site   </a></p></description><Point><altitudeMode>relativeToGround</altitudeMode><coordinates>114.180,22.190,0</coordinates></Point><Style><IconStyle><Icon><href>http://data.aims.gov.au/resources/images/flags/CH-flag.gif</href></Icon></IconStyle></Style><TimeStamp><when>2000</when></TimeStamp></Placemark>
<Placemark><name>Pohoiki, Hawaii </name><description><p>Asolkar RN, Maskey RP, Helmke E, Laatsch H (2002) "Chalcomycin B, a new macrolide antibiotic from the marine isolate Streptomyces sp. B7064." J. Antibiot. 55: 893-898.</p><p><a href="http://pubchem.ncbi.nlm.nih.gov/summary/summary.cgi?cid=6436271">   Click here to open the natural product's record in Pubchem   </a></p><p><a href="http://www.antibiotics.or.jp/journal/contents/vol-55/abstract/55-10/6.htm">   Click here to open the article's abstract at the publisher's web-site   </a></p></description><Point><altitudeMode>relativeToGround</altitudeMode><coordinates>-154.804,19.446,0</coordinates></Point><Style><IconStyle><Icon><href>http://data.aims.gov.au/resources/images/flags/DE-flag.gif</href></Icon></IconStyle></Style><TimeStamp><when>2002</when></TimeStamp></Placemark>
<Placemark><name>Whitewater Bay, Florida </name><description><p>Xu X, de Guzman FS, Gloer JB, Shearer CA (1992) "Stachybotrins A and B: Novel bioactive metabolites from a brackish water isolate of the fungus Stachybotrys sp." J. Org. Chem. 57: 6700-6703.</p><p><a href="http://dx.doi.org/10.1021/jo00051a006">   Click here to open the article's abstract at the publisher's web-site   </a></p></description><Point><altitudeMode>relativeToGround</altitudeMode><coordinates>-81.000,25.307,0</coordinates></Point><Style><IconStyle><Icon><href>http://data.aims.gov.au/resources/images/flags/US-flag.gif</href></Icon></IconStyle></Style><TimeStamp><begin>1992-01</begin><end>1992-12</end></TimeStamp></Placemark>
<Placemark><name>Sea of Cortez (Gulf of California), Mexico</name><description><p>Tapiolas DM, Roman M, Fenical W, Stout TJ, Clardy J (1991) "Octalactins A and B: Cytotoxic eight-membered-ring lactones from a marine bacterium, Streptomyces sp." J. Am. Chem. Soc. 113: 4682-4683.</p><p><a href="http://dx.doi.org/10.1021/ja00012a048">   Click here to open the article's abstract at the publisher's web-site   </a></p></description><Point><altitudeMode>relativeToGround</altitudeMode><coordinates>-110.580085036,25.7596324789,0</coordinates></Point><Style><IconStyle><Icon><href>http://data.aims.gov.au/resources/images/flags/US-flag.gif</href></Icon></IconStyle></Style><TimeStamp><when>1991</when></TimeStamp></Placemark>
<Placemark><name>Davies Reef, Great Barrier Reef</name><description><p>Long PF, Dunlap WC, Battershill CN, Jaspars M (2005) "Shotgun cloning and heterologous expression of the patellamide gene cluster as a strategy to achieving sustained metabolite production." ChemBioChem 6: 1760-1765.</p><p><a href="http://dx.doi.org/10.1002/cbic.200500210">   Click here to open the article's abstract at the publisher's web-site   </a></p></description><Point><altitudeMode>relativeToGround</altitudeMode><coordinates>147.633,-18.85,0</coordinates></Point><Style><IconStyle><Icon><href>http://data.aims.gov.au/resources/images/flags/UK-flag.gif</href></Icon></IconStyle></Style><TimeStamp><when>2005</when></TimeStamp></Placemark>
<Placemark><name>Torrey Pines Estuary, La Jolla, California, USA</name><description><p>Pathirana C, Jensen P, R., Fenical W (1992) "Marinone and debromomarinone antibiotic sesquiterpenoid naphthoquinones of a new structure class from a marine bacterium." Tetrahedron Letters 33: 7663-7666.</p><p><a href="http://dx.doi.org/10.1016/0040-4039(93)88010-G">   Click here to open the article's abstract at the publisher's web-site   </a></p></description><Point><altitudeMode>relativeToGround</altitudeMode><coordinates>-117.263,32.935,0</coordinates></Point><Style><IconStyle><Icon><href>http://data.aims.gov.au/resources/images/flags/US-flag.gif</href></Icon></IconStyle></Style><TimeStamp><when>1992</when></TimeStamp></Placemark>
<Placemark><name>Hawaii</name><description><p>Poch GK, James B. Gloer (1989) "Helicascolides A and B: New lactones from the marine fungus Helicascus kanaloanus." J. Nat. Prod. 52: 257-260.</p><p><a href="http://pubchem.ncbi.nlm.nih.gov/summary/summary.cgi?cid=6439087">   Click here to open the natural product's record in Pubchem   </a></p><p><a href="http://dx.doi.org/10.1021/np50062a006">   Click here to open the article's abstract at the publisher's web-site   </a></p></description><Point><altitudeMode>relativeToGround</altitudeMode><coordinates>-155.866,21.35,0</coordinates></Point><Style><IconStyle><Icon><href>http://data.aims.gov.au/resources/images/flags/US-flag.gif</href></Icon></IconStyle></Style><TimeStamp><when>1989</when></TimeStamp></Placemark>
<Placemark><name>Caeser's Rocks, Benga, Fiji</name><description><p>Bugni TS, Abbanat D, Bernan VS, Maiese WM, Greenstein M, Van Wagoner RM, Ireland CM (2000) "Yanuthones: Novel metabolites from a marine isolate of Aspergillus niger." J. Org. Chem. 6: 7195-7200.</p><p><a href="http://dx.doi.org/10.1021/jo0006831">   Click here to open the article's abstract at the publisher's web-site   </a></p></description><Point><altitudeMode>relativeToGround</altitudeMode><coordinates>178.020,-18.323263,0</coordinates></Point><Style><IconStyle><Icon><href>http://data.aims.gov.au/resources/images/flags/US-flag.gif</href></Icon></IconStyle></Style><TimeStamp><when>2000</when></TimeStamp></Placemark>
<Placemark><name>Dravuni, Fiji</name><description><p>Bugni TS, Janso JE, Williamson RT, Feng X, Bernan VS, Greenstein M, Carter GT, Maiese WM, Ireland CM (2004) "Dictyosphaeric acids A and B: New decalactones from an undescribed Penicillium sp. obtained from the alga Dictyosphaeria versluyii." J. Nat. Prod. 67: 1396-1399.</p><p><a href="http://dx.doi.org/10.1021/np049973t">   Click here to open the article's abstract at the publisher's web-site   </a></p></description><Point><altitudeMode>relativeToGround</altitudeMode><coordinates>178.525,-18.7673,0</coordinates></Point><Style><IconStyle><Icon><href>http://data.aims.gov.au/resources/images/flags/US-flag.gif</href></Icon></IconStyle></Style><TimeStamp><when>2004</when></TimeStamp></Placemark>
<Placemark><name>Bali Bata National Park, Indonesia</name><description><p>Jadulco R, Brauers G, Edrada RA, Ebel R, Wray V, Sudarsono, Proksch P (2002) "New metabolites from sponge-derived fungi Curvularia lunata and Cladosporium herbarum." J. Nat. Prod. 65: 730-733.</p><p><a href="http://pubchem.ncbi.nlm.nih.gov/summary/summary.cgi?cid=636723">   Lunatin Click here to open the natural product's record in Pubchem   </a></p><p><a href="http://pubchem.ncbi.nlm.nih.gov/summary/summary.cgi?cid=3084629">   Herbarin Click here to open the natural product's record in Pubchem   </a></p><p><a href="http://dx.doi.org/10.1021/np010390i">   Click here to open the article's abstract at the publisher's web-site   </a></p></description><Point><altitudeMode>relativeToGround</altitudeMode><coordinates>114.432222,-8.088889,0</coordinates></Point><Style><IconStyle><Icon><href>http://data.aims.gov.au/resources/images/flags/DE-flag.gif</href></Icon></IconStyle></Style><TimeStamp><when>2002</when></TimeStamp></Placemark>
<Placemark><name>Bali Bata National Park, Indonesia</name><description><p>Jadulco R, Proksch P, Wray V, Sudarsono, Berg A, Grafe U (2001) "New macrolides and furan carboxylic acid derivative from the sponge-derived fungus Cladosporium herbarum." J. Nat. Prod. 64: 527 � 530.</p><p><a href="http://dx.doi.org/10.1021/np000401s">   Click here to open the article's abstract at the publisher's web-site   </a></p></description><Point><altitudeMode>relativeToGround</altitudeMode><coordinates>114.432222,-8.088889,0</coordinates></Point><Style><IconStyle><Icon><href>http://data.aims.gov.au/resources/images/flags/DE-flag.gif</href></Icon></IconStyle></Style><TimeStamp><when>2001</when></TimeStamp></Placemark>
<Placemark><name>Long Island, Bahamas</name><description><p>Tan LT, Cheng XC, Jensen PR, Fenical W (2003) "Scytalidamides A and B, new cytotoxic cyclic heptapeptides from a marine fungus of the genus Scytalidium." J. Org. Chem. 68: 8767-8773.</p><p><a href="http://dx.doi.org/10.1021/jo030191z">   Click here to open the article's abstract at the publisher's web-site   </a></p></description><Point><altitudeMode>relativeToGround</altitudeMode><coordinates>-75.352,23.721,0</coordinates></Point><Style><IconStyle><Icon><href>http://data.aims.gov.au/resources/images/flags/US-flag.gif</href></Icon></IconStyle></Style><TimeStamp><when>2003</when></TimeStamp></Placemark>
<Placemark><name>Maui, Hawaii, USA</name><description><p>Amagata T, Rath C, Rigot JF, Tarlov N, Tenney K, Valeriote FA, Crews P (2003) "Structures and cytotoxic properties of trichoverroids and their macrolide analogues produced by saltwater culture of Myrothecium verrucaria." J. Med. Chem. 46: 4342-4350.</p><p><a href="http://dx.doi.org/10.1021/jm030090t">   Click here to open the article's abstract at the publisher's web-site   </a></p></description><Point><altitudeMode>relativeToGround</altitudeMode><coordinates>-155.953,20.915,0</coordinates></Point><Style><IconStyle><Icon><href>http://data.aims.gov.au/resources/images/flags/US-flag.gif</href></Icon></IconStyle></Style><TimeStamp><when>2003</when></TimeStamp></Placemark>
<Placemark><name>Pohnpei(Ponape), Federated States of Micronesia</name><description><p>Kito K, Ookura R, Yoshida S, Namikoshi M, Ooi T, Kusumi T (2007) "Pentaketides relating to aspinonene and dihydroaspyrone from a marine-derived fungus, Aspergillus ostianus." J. Nat. Prod. 70: 2022-2025.</p><p><a href="http://dx.doi.org/10.1021/np070301n">   Click here to open the article's abstract at the publisher's web-site   </a></p></description><Point><altitudeMode>relativeToGround</altitudeMode><coordinates>158.422,7,0</coordinates></Point><Style><IconStyle><Icon><href>http://data.aims.gov.au/resources/images/flags/JP-flag.gif</href></Icon></IconStyle></Style><TimeStamp><when>2007</when></TimeStamp></Placemark>
<Placemark><name>Milne Bay, Papua New Guinea</name><description><p>Boot CM, Tenney K, Valeriote FA, Crews P (2006) "Highly n-methylated linear peptides produced by an atypical sponge-derived Acremonium sp." J. Nat. Prod. 69: 83 � 92.</p><p><a href="http://dx.doi.org/10.1021/np0503653">   Click here to open the article's abstract at the publisher's web-site   </a></p></description><Point><altitudeMode>relativeToGround</altitudeMode><coordinates>151.674,-9.989,0</coordinates></Point><Style><IconStyle><Icon><href>http://data.aims.gov.au/resources/images/flags/US-flag.gif</href></Icon></IconStyle></Style><TimeStamp><when>2006</when></TimeStamp></Placemark>
<Placemark><name>Halawa Stream, Oahu, Hawaii, USA</name><description><p>Ford PW, Gadepalli M, Davidson BS (1998) "Halawanones A-D, new polycyclic quinones from a marine-derived Streptomycete." J. Nat. Prod. 61: 1232 � 1236.</p><p><a href="http://dx.doi.org/10.1021/np980126y">   Click here to open the article's abstract at the publisher's web-site   </a></p></description><Point><altitudeMode>relativeToGround</altitudeMode><coordinates>-157.943,21.373,0</coordinates></Point><Style><IconStyle><Icon><href>http://data.aims.gov.au/resources/images/flags/US-flag.gif</href></Icon></IconStyle></Style><TimeStamp><when>1998</when></TimeStamp></Placemark>
<Placemark><name>Tenerife, Canary Islands, Spain</name><description><p>Krick A, Kehraus S, Gerhauser C, Klimo K, Nieger M, Maier A, Fiebig H-H, Atodiresei I, Raabe G, Fleischhauer J, Konig GM (2007) "Potential cancer chemopreventive in vitro activities of monomeric xanthone derivatives from the marine algicolous fungus Monodictys putredinis." J. Nat. Prod. 70: 353-360.</p><p><a href="http://dx.doi.org/10.1021/np060505o">   Click here to open the article's abstract at the publisher's web-site   </a></p></description><Point><altitudeMode>relativeToGround</altitudeMode><coordinates>-16.278,28.107,0</coordinates></Point><Style><IconStyle><Icon><href>http://data.aims.gov.au/resources/images/flags/DE-flag.gif</href></Icon></IconStyle></Style><TimeStamp><when>2007</when></TimeStamp></Placemark>
<Placemark><name>Hong Kong</name><description><p>Huang H, She Z, Lin Y, Vrijmoed LLP, Lin W (2007) "Cyclic peptides from an endophytic fungus obtained from a mangrove leaf (Kandelia candel)" J. Nat. Prod. 70: 1696 � 1699.</p><p><a href="http://dx.doi.org/10.1021/np0605891">   Click here to open the article's abstract at the publisher's web-site   </a></p></description><Point><altitudeMode>relativeToGround</altitudeMode><coordinates>114.092,22.254,0</coordinates></Point><Style><IconStyle><Icon><href>http://data.aims.gov.au/resources/images/flags/CH-flag.gif</href></Icon></IconStyle></Style><TimeStamp><when>2007</when></TimeStamp></Placemark>
<Placemark><name>Si Chang Island, Thailand</name><description><p>Jaruchoktaweechai C, Suwanborirux K, Tanasupawatt S, Kittakoop P, Menasveta P (2000) "New macrolactins from a marine Bacillus sp. Sc026." J. Nat. Prod. 63: 984 -986.</p><p><a href="http://dx.doi.org/10.1021/np990605c">   Click here to open the article's abstract at the publisher's web-site   </a></p></description><Point><altitudeMode>relativeToGround</altitudeMode><coordinates>100.800,13.148,0</coordinates></Point><Style><IconStyle><Icon><href>http://data.aims.gov.au/resources/images/flags/TH-flag.gif</href></Icon></IconStyle></Style><TimeStamp><when>2000</when></TimeStamp></Placemark>
<Placemark><name>South China Sea</name><description><p>Jiang S, Sun W, Chen M, Dai S, Zhang L, Liu Y, Lee KJ, Li X (2007) "Diversity of culturable actinobacteria isolated from marine sponge Haliclona sp." Antonie Van Leeuwenhoek: 92:405-416.</p><p><a href="http://dx.doi.org/10.1007/s10482-007-9169-z">   Click here to open the article's abstract at the publisher's web-site   </a></p></description><Point><altitudeMode>relativeToGround</altitudeMode><coordinates>109.48333,18.216667,0</coordinates></Point><Style><IconStyle><Icon><href>http://data.aims.gov.au/resources/images/flags/CH-flag.gif</href></Icon></IconStyle></Style><TimeStamp><when>2007</when></TimeStamp></Placemark>
<Placemark><name>San Luis Estuary, California, USA</name><description><p>Cheng X, Jensen P, Fenical W (1999) "Luisols A and B, new aromatic tetraols produced by an estuarine marine bacterium of the genus Streptomyces (Actinomycetales)" J Nat Prod. 62: 608-10.</p><p><a href="http://dx.doi.org/10.1021/np980415m ">   Click here to open the article's abstract at the publisher's web-site   </a></p></description><Point><altitudeMode>relativeToGround</altitudeMode><coordinates>-117.413,33.198,0</coordinates></Point><Style><IconStyle><Icon><href>http://data.aims.gov.au/resources/images/flags/US-flag.gif</href></Icon></IconStyle></Style><TimeStamp><when>1999</when></TimeStamp></Placemark>
<Placemark><name>Deep sea sediment south-east of Fiji</name><description><p>Gautschi JT, Amagata, T., Amagata A, Valeriote FA. Mooberry SL, Crews P (2004) "Expanding the strategies in natural product studies of marine-derived fungi: A chemical investigation of Penicillium obtained from deep water sediment." J Nat Prod. 67: 362-367.</p><p><a href="http://pubchem.ncbi.nlm.nih.gov/summary/summary.cgi?cid=177381">   Anserinone A Click here to open the natural product's record in Pubchem   </a></p>><p><a href="http://pubchem.ncbi.nlm.nih.gov/summary/summary.cgi?cid=177382">   Anserinone B Click here to open the natural product's record in Pubchem   </a></p><p><a href="http://dx.doi.org/10.1021/np030388m">   Click here to open the article's abstract at the publisher's web-site   </a></p></description><Point><altitudeMode>relativeToGround</altitudeMode><coordinates>178.642,-18.2533,0</coordinates></Point><Style><IconStyle><Icon><href>http://data.aims.gov.au/resources/images/flags/US-flag.gif</href></Icon></IconStyle></Style><TimeStamp><when>2004</when></TimeStamp></Placemark>
<Placemark><name>South China Sea near Vietnamese Coast</name><description><p>Oleinikova G, Shevchenko L, Kuznetsova T, Mikhalov V (1995) "A novel fungicide of the iturin group, obtained from a marine isolate of Bacillus subtilis. Isolation, physico-chemical and biochemical properties, identification." Antibiot Khimioter. 40: 19-21. (Note article in Russian)</p><p>Abstract: Strain KMM 457 of Bacillus subtilis was isolated from a frozen sample of the soft coral Sarcophyton sp. The samples were collected in 1989 in the South China Sea near the Vietnam Shore during an expedition on the board of R/V "Akademik Oparin". Metabolites of the isolate were investigated and it was found to produce a number of physiologically active compounds. One of them designated as OGA showed fungicidal activity. By the physicochemical properties it was referred to the group of iturins. The comparison with the described antibiotics of the iturin group suggested that it was a new representative of the iturin group.</p></description><Point><altitudeMode>relativeToGround</altitudeMode><coordinates>111.056,13.430,0</coordinates></Point><Style><IconStyle><Icon><href>http://data.aims.gov.au/resources/images/flags/RU-flag.gif</href></Icon></IconStyle></Style><TimeStamp><when>1995</when></TimeStamp></Placemark>
<Placemark><name>Maui, Hawaii</name><description><p>Oh D, Jensen P, Fenical W (2006) "Zygosporamide, a cytotoxic cyclic depsipeptide from the marine-derived fungus Zygosporium masonii." Tetrahedron Lett. 47: 8625-8628.</p><p><a href="http://dx.doi.org/10.1016/j.tetlet.2006.08.113">   Click here to open the article's abstract at the publisher's web-site   </a></p></description><Point><altitudeMode>relativeToGround</altitudeMode><coordinates>-155.96,20.95,0</coordinates></Point><Style><IconStyle><Icon><href>http://data.aims.gov.au/resources/images/flags/US-flag.gif</href></Icon></IconStyle></Style><TimeStamp><when>2006</when></TimeStamp></Placemark>
<Placemark><name>Bahamas</name><description><p>Oh D, Strangman W, Kauffman C, Jensen P, Fenical W (2007) "Thalassospiramides A and B, immunosuppressive peptides from the marine bacterium Thalassospira sp." Org. Lett. 9: 1525-1528.</p><p><a href="http://dx.doi.org/10.1021/ol070294u">   Click here to open the article's abstract at the publisher's web-site   </a></p></description><Point><altitudeMode>relativeToGround</altitudeMode><coordinates>-78.36,23.50,0</coordinates></Point><Style><IconStyle><Icon><href>http://data.aims.gov.au/resources/images/flags/US-flag.gif</href></Icon></IconStyle></Style><TimeStamp><when>2007</when></TimeStamp></Placemark>
<Placemark><name>Kuala Selangor, Malaysia</name><description><p>McDonald L, Barbieri L, Bernan V, Janso J, Lassota P, Carter G (2004) "07h239-a, a new cytotoxic eremophilane sesquiterpene from the marine-derived xylariaceous fungus ll-07h239." J. Nat. Prod. 67: 1565-1567.</p><p><a href="http://dx.doi.org/10.1021/np049924g">   Click here to open the article's abstract at the publisher's web-site   </a></p></description><Point><altitudeMode>relativeToGround</altitudeMode><coordinates>101.23,3.30,0</coordinates></Point><Style><IconStyle><Icon><href>http://data.aims.gov.au/resources/images/flags/US-flag.gif</href></Icon></IconStyle></Style><TimeStamp><when>2004</when></TimeStamp></Placemark>
<Placemark><name>Gulf of Mexico</name><description><p>Park Y, Gunasekera S, Lopez J, McCarthy P, Wright A (2006) "Metabolites from the marine-derived fungus Chromocleista sp. isolated from a deep-water sediment sample collected in the Gulf of Mexico." J. Nat. Prod. 69: 580-584.</p><p><a href="http://dx.doi.org/10.1021/np058113p">   Click here to open the article's abstract at the publisher's web-site   </a></p></description><Point><altitudeMode>relativeToGround</altitudeMode><coordinates>-83.718,26.327,0</coordinates></Point><Style><IconStyle><Icon><href>http://data.aims.gov.au/resources/images/flags/US-flag.gif</href></Icon></IconStyle></Style><TimeStamp><when>2006</when></TimeStamp></Placemark>
<Placemark><name>Bahamas</name><description><p>Jenkins K, Jensen P, Fenical W (1999) "Thraustochytrosides A-C: New glycosphingolipids from a unique marine protist, Thraustochytrium globosum." Tetrahedron Lett. 40: 7637-7640.</p><p><a href="http://dx.doi.org/10.1016/S0040-4039(99)01562-2">   Click here to open the article's abstract at the publisher's web-site   </a></p></description><Point><altitudeMode>relativeToGround</altitudeMode><coordinates>-78.36,23.50,0</coordinates></Point><Style><IconStyle><Icon><href>http://data.aims.gov.au/resources/images/flags/US-flag.gif</href></Icon></IconStyle></Style><TimeStamp><when>1999</when></TimeStamp></Placemark>
<Placemark><name>Yung Shue O, Hong Kong</name><description><p>Miao L, Kwong T, Qian P (2006) "Effect of culture conditions on mycelial growth, antibacterial activity, and metabolite profiles of the marine-derived fungus Arthrinium c.F. saccharicola." Appl. Microbiol. Biotechnol. 72: 1063-1073.</p><p><a href="http://dx.doi.org/10.1007/s00253-006-0376-8">   Click here to open the article's abstract at the publisher's web-site   </a></p></description><Point><altitudeMode>relativeToGround</altitudeMode><coordinates>114.10,22.23,0</coordinates></Point><Style><IconStyle><Icon><href>http://data.aims.gov.au/resources/images/flags/CH-flag.gif</href></Icon></IconStyle></Style><TimeStamp><when>2006</when></TimeStamp></Placemark>
</Document>
</kml>
