# Supplementary material
Source: MDPI journal article supplement (https://www.mdpi.com/1660-3397/6/4/550)

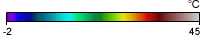

Supplement: s1 [file s1 › files/modis_sst_l3.gif]

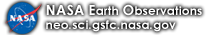

Supplement: s1 [file s1 › files/google_earth_banner.png]

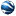

Supplement: s1 [file s1 › files/mysavedplaces_closed.png]

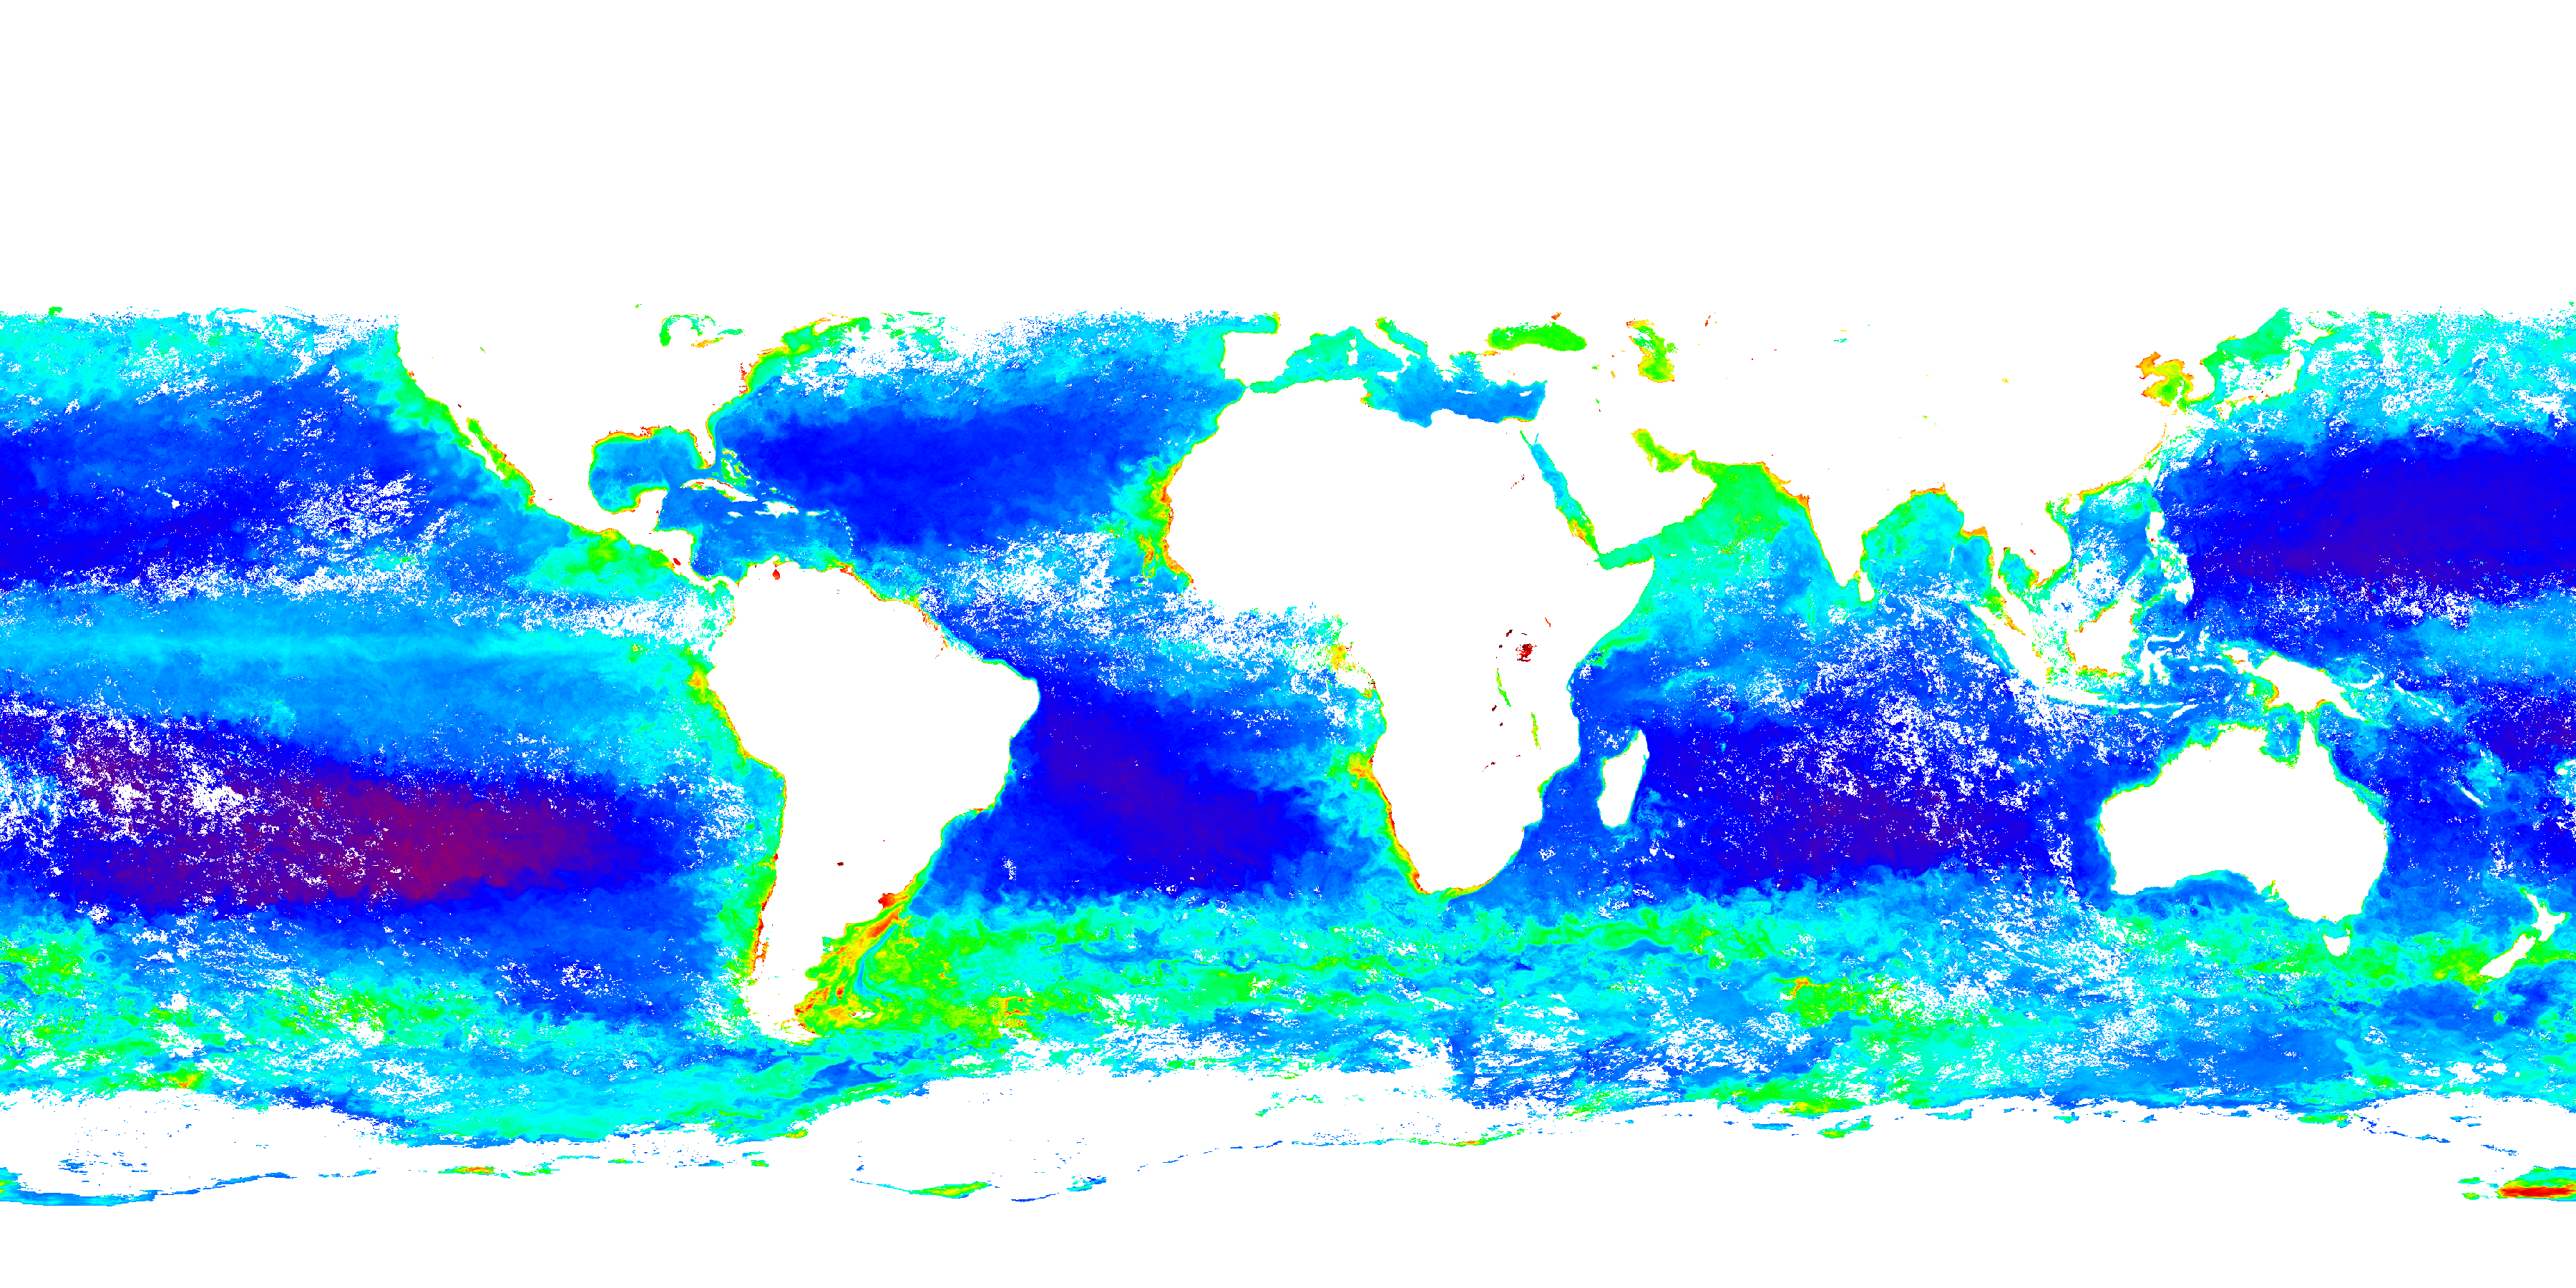

Supplement: s1 [file s1 › files/735022rgb_T.KMZ.png]

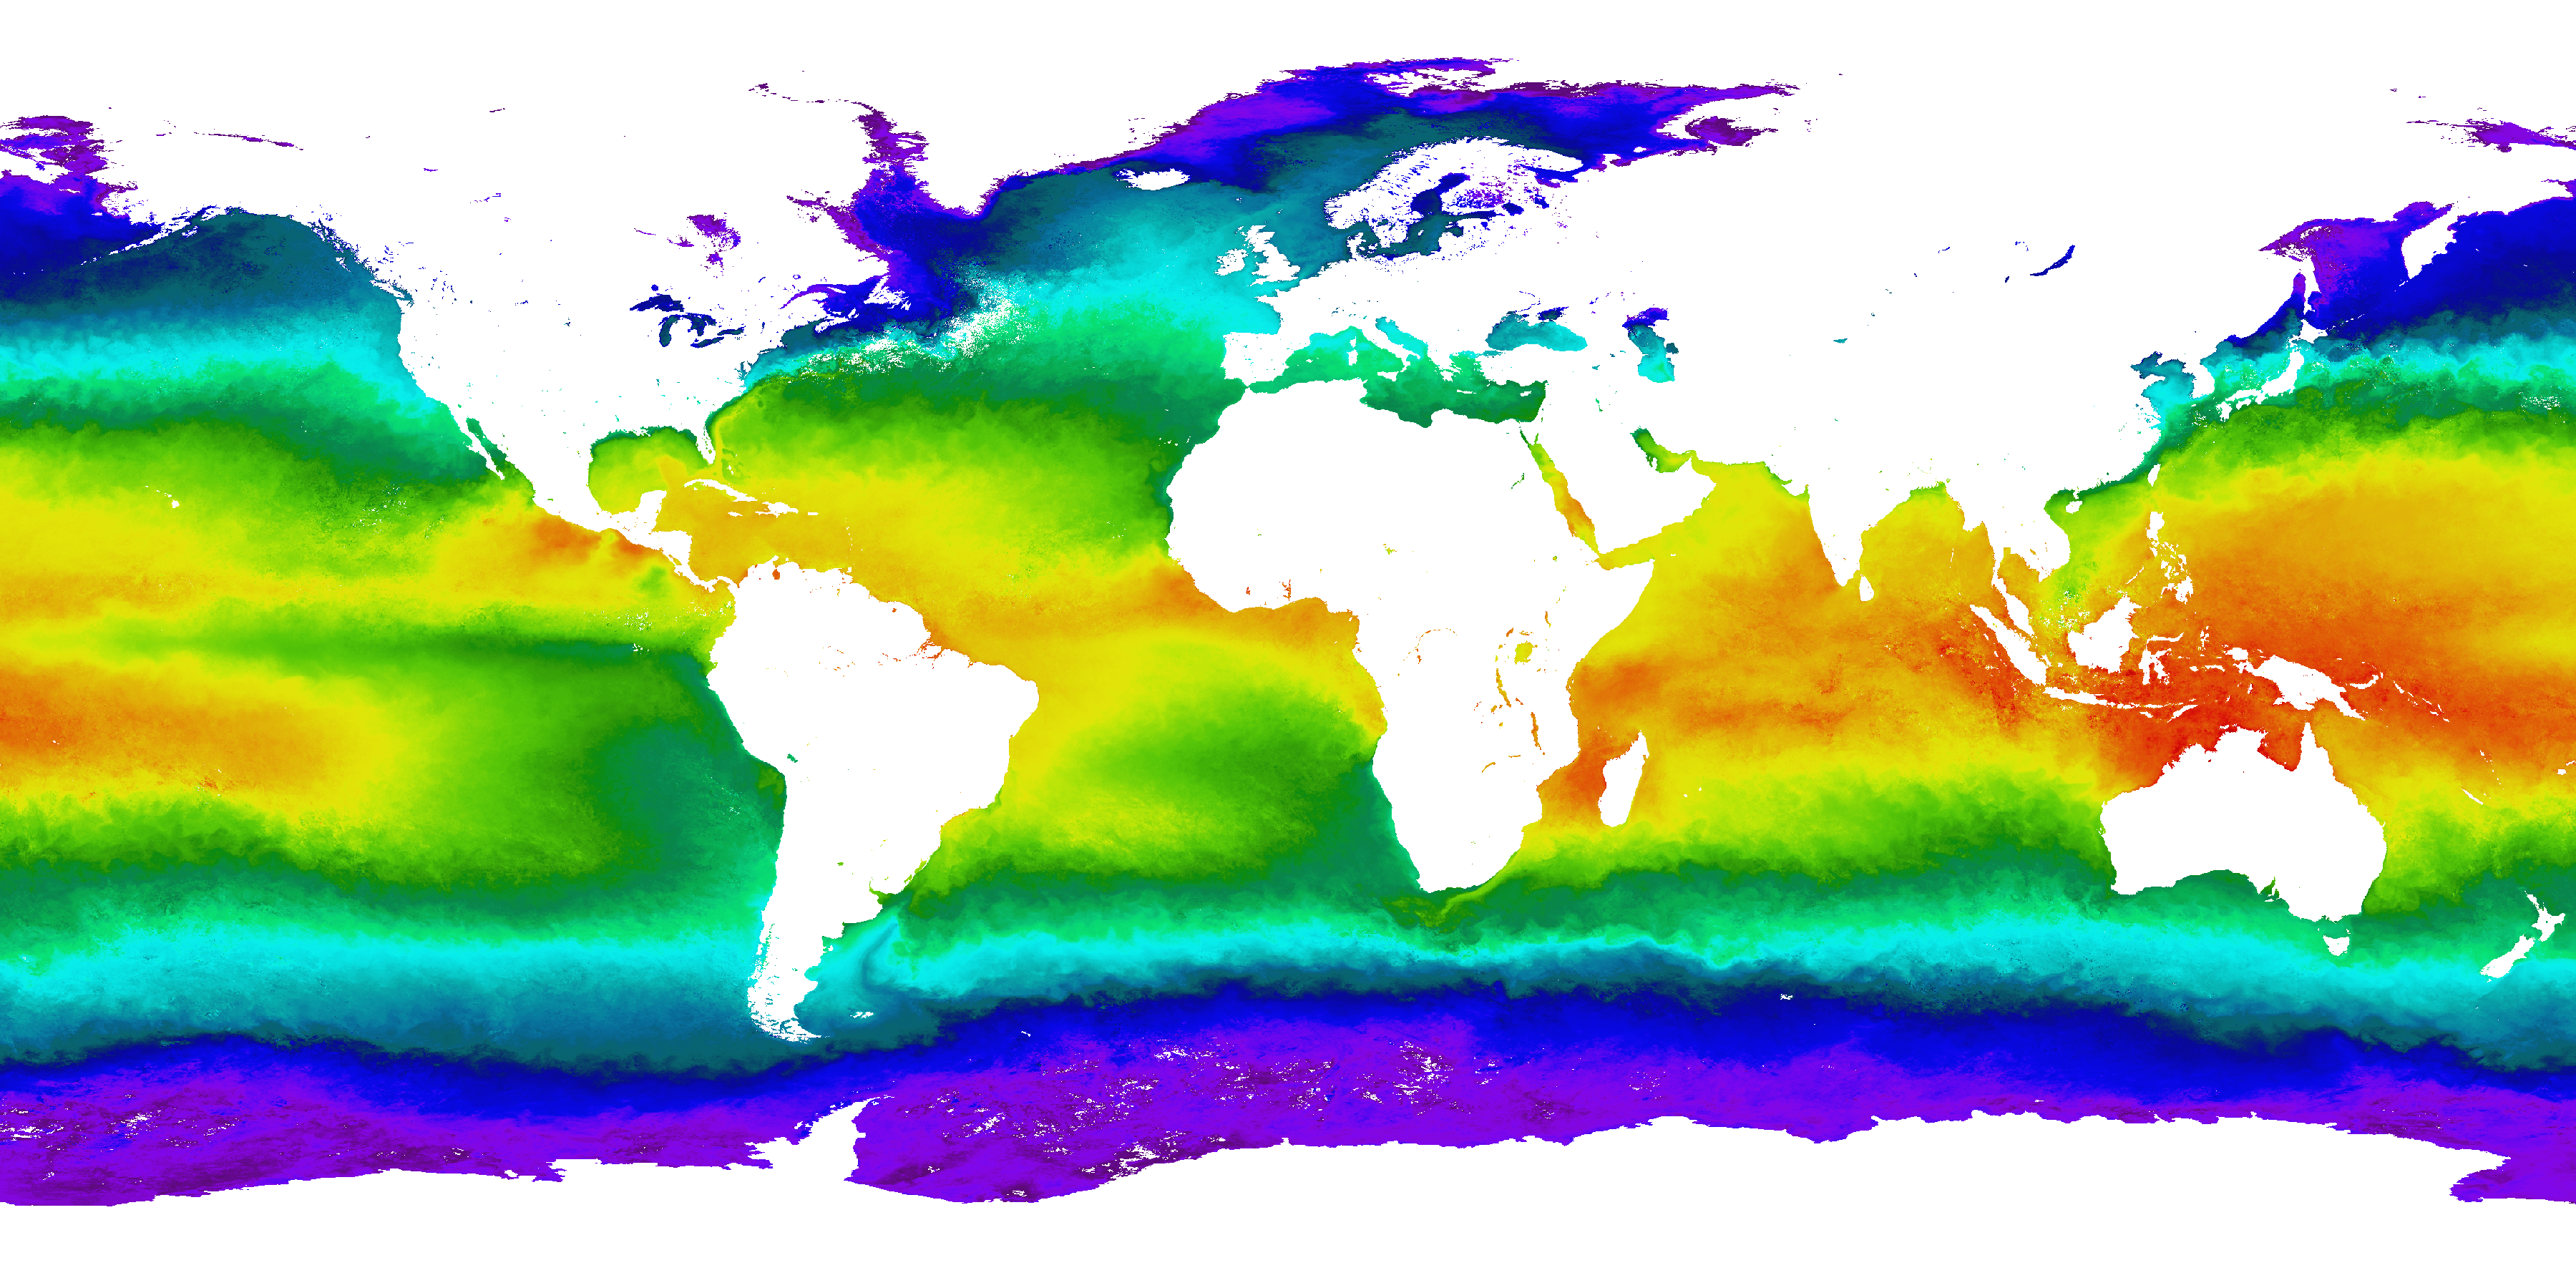

Supplement: s1 [file s1 › files/735018rgb_T.KMZ.png]

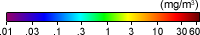

Supplement: s1 [file s1 › files/modis_chlor.gif]
